# Supplementary material for: Phenomic Impact of Genetically-Determined Euthyroid Function and Molecular Differences between Thyroid Disorders
Source: PubMed Central journal article supplement (PMC6210201; doi:10.3390/jcm7100296), 2018-09-21
Supplement: jcm-07-00296-s001.pdf [file jcm-07-00296-s001.pdf]

**Table S1.** Variants included in the genetic instruments used to investigate TSH and FT4.

| Phenotype | SNP         | effect_allele | other_allele | eaf    | $\beta$ | SE       | $p$      | $n$    | Reference |
|-----------|-------------|---------------|--------------|--------|---------|----------|----------|--------|-----------|
| TSH       | rs6885099   | A             | G            | 0.594  | -0.141  | 0.009    | 1.95E-56 | 26,042 | 9         |
|           | rs28435578  | C             | T            | 0.227  | -0.166  | 0.014    | 4.59E-32 | 16,333 | 10        |
|           | rs3008034   | C             | T            | 0.312  | -0.131  | 0.012    | 4.68E-26 | 16,335 | 10        |
|           | rs10799824  | A             | G            | 0.161  | -0.113  | 0.012    | 3.60E-21 | 26,031 | 9         |
|           | rs17767742  | G             | C            | 0.354  | -0.113  | 0.012    | 5.64E-20 | 16,335 | 10        |
|           | rs112817873 | T             | A            | 0.323  | -0.14   | 0.015    | 6.15E-20 | 11,544 | 10        |
|           | rs7568039   | A             | C            | 0.25   | -0.122  | 0.014    | 2.11E-19 | 16,335 | 10        |
|           | rs9472138   | T             | C            | 0.285  | -0.079  | 0.01     | 6.72E-16 | 25,767 | 9         |
|           | rs6923866   | C             | T            | 0.28   | -0.102  | 0.013    | 7.55E-15 | 16,333 | 10        |
|           | rs2928167   | G             | A            | 0.104  | -0.145  | 0.019    | 5.94E-14 | 16,334 | 10        |
|           | rs9915657   | T             | C            | 0.541  | -0.064  | 0.009    | 7.53E-13 | 25,692 | 9         |
|           | rs334699    | A             | G            | 0.052  | -0.141  | 0.021    | 5.40E-12 | 25,757 | 9         |
|           | rs10519227  | A             | T            | 0.245  | -0.072  | 0.011    | 1.02E-11 | 25,988 | 9         |
|           | rs116909374 | T             | C            | 0.043  | -0.208  | 0.032    | 4.69E-11 | 15,037 | 10        |
|           | rs17723470  | T             | C            | 0.279  | -0.065  | 0.01     | 8.83E-11 | 26,054 | 9         |
|           | rs17776563  | A             | G            | 0.322  | -0.06   | 0.01     | 2.89E-10 | 25,758 | 9         |
|           | rs4804416   | T             | G            | 0.569  | -0.057  | 0.009    | 3.16E-10 | 25,632 | 9         |
|           | rs657152    | A             | C            | 0.343  | 0.058   | 0.009    | 4.11E-10 | 25,765 | 9         |
|           | rs11624776  | A             | C            | 0.66   | -0.064  | 0.011    | 1.79E-09 | 23,482 | 9         |
|           | rs7825175   | A             | G            | 0.21   | -0.066  | 0.011    | 2.94E-09 | 25,996 | 9         |
| rs310763  | T           | C             | 0.235        | 0.083  | 0.014   | 6.15E-09 | 16,334   | 10     |           |
| rs1537424 | T           | C             | 0.608        | -0.052 | 0.009   | 1.17E-08 | 25,478   | 9      |           |
| rs9497965 | T           | C             | 0.415        | 0.051  | 0.009   | 2.25E-08 | 25,980   | 9      |           |
| rs1571583 | A           | G             | 0.249        | 0.057  | 0.01    | 2.55E-08 | 25,766   | 9      |           |
| FT4       | rs2235544   | A             | C            | 0.499  | 0.154   | 0.013    | 5.23E-34 | 13,650 | 10        |
|           | rs7860634   | A             | G            | 0.53   | 0.102   | 0.013    | 2.30E-14 | 14,529 | 9         |
|           | rs7045138   | T             | C            | 0.553  | 0.098   | 0.015    | 1.50E-11 | 10,997 | 9         |
|           | rs7694879   | T             | C            | 0.095  | 0.137   | 0.022    | 4.15E-10 | 13,650 | 10        |
|           | rs113107469 | T             | C            | 0.032  | 0.223   | 0.037    | 1.27E-09 | 13,649 | 10        |

**Table S2:** List of GWAS summary association data regarding 2419 traits used in the study.

| <b>UKB code</b> | <b>UKB Description</b>                                        | <b>Analyses Conducted</b> |
|-----------------|---------------------------------------------------------------|---------------------------|
| 46              | Hand grip strength (left)                                     | MR, LDSC                  |
| 47              | Hand grip strength (right)                                    | MR, LDSC                  |
| 48              | Waist circumference                                           | MR, LDSC                  |
| 49              | Hip circumference                                             | MR, LDSC                  |
| 50              | Standing height                                               | MR, LDSC                  |
| 78              | Heel bone mineral density (BMD) T-score, automated            | MR, LDSC                  |
| 102             | Pulse rate, automated reading                                 | MR, LDSC                  |
| 134             | Number of self-reported cancers                               | MR, LDSC                  |
| 135             | Number of self-reported non-cancer illnesses                  | MR, LDSC                  |
| 136             | Number of operations, self-reported                           | MR, LDSC                  |
| 137             | Number of treatments/medications taken                        | MR, LDSC                  |
| 189             | Townsend deprivation index at recruitment                     | MR, LDSC                  |
| 399             | Number of incorrect matches in round                          | MR, LDSC                  |
| 757             | Time employed in main current job                             | MR, LDSC                  |
| 767             | Length of working week for main job                           | MR, LDSC                  |
| 777             | Frequency of travelling from home to job workplace            | MR, LDSC                  |
| 796             | Distance between home and job workplace                       | MR, LDSC                  |
| 806             | Job involves mainly walking or standing                       | MR, LDSC                  |
| 816             | Job involves heavy manual or physical work                    | MR, LDSC                  |
| 826             | Job involves shift work                                       | MR, LDSC                  |
| 845             | Age completed full time education                             | MR, LDSC                  |
| 864             | Number of days/week walked 10+ minutes                        | MR, LDSC                  |
| 874             | Duration of walks                                             | MR, LDSC                  |
| 884             | Number of days/week of moderate physical activity 10+ minutes | MR, LDSC                  |
| 894             | Duration of moderate activity                                 | MR, LDSC                  |
| 904             | Number of days/week of vigorous physical activity 10+ minutes | MR, LDSC                  |
| 914             | Duration of vigorous activity                                 | MR, LDSC                  |

|      |                                                   |          |
|------|---------------------------------------------------|----------|
| 924  | Usual walking pace                                | MR, LDSC |
| 943  | Frequency of stair climbing in last 4 weeks       | MR, LDSC |
| 971  | Frequency of walking for pleasure in last 4 weeks | MR, LDSC |
| 981  | Duration walking for pleasure                     | MR, LDSC |
| 991  | Frequency of strenuous sports in last 4 weeks     | MR, LDSC |
| 1001 | Duration of strenuous sports                      | MR, LDSC |
| 1011 | Frequency of light DIY in last 4 weeks            | MR, LDSC |
| 1021 | Duration of light DIY                             | MR, LDSC |
| 1070 | Time spent watching television (TV)               | MR, LDSC |
| 1080 | Time spent using computer                         | MR, LDSC |
| 1090 | Time spent driving                                | MR, LDSC |
| 1100 | Drive faster than motorway speed limit            | MR, LDSC |
| 1160 | Sleep duration                                    | MR, LDSC |
| 1170 | Getting up in morning                             | MR, LDSC |
| 1180 | Morning/evening person (chronotype)               | MR, LDSC |
| 1190 | Nap during day                                    | MR, LDSC |
| 1200 | Sleeplessness / insomnia                          | MR, LDSC |
| 1210 | Snoring                                           | MR, LDSC |
| 1220 | Daytime dozing / sleeping (narcolepsy)            | MR, LDSC |
| 1239 | Current tobacco smoking                           | MR, LDSC |
| 1249 | Past tobacco smoking                              | MR, LDSC |
| 1259 | Smoking/smokers in household                      | MR, LDSC |
| 1269 | Exposure to tobacco smoke at home                 | MR, LDSC |
| 1279 | Exposure to tobacco smoke outside home            | MR, LDSC |
| 1558 | Alcohol intake frequency.                         | MR, LDSC |
| 1568 | Average weekly red wine intake                    | MR, LDSC |
| 1578 | Average weekly champagne plus white wine intake   | MR, LDSC |
| 1588 | Average weekly beer plus cider intake             | MR, LDSC |
| 1598 | Average weekly spirits intake                     | MR, LDSC |
| 1608 | Average weekly fortified wine intake              | MR, LDSC |

|      |                                                         |          |
|------|---------------------------------------------------------|----------|
| 1618 | Alcohol usually taken with meals                        | MR, LDSC |
| 1628 | Alcohol intake versus 10 years previously               | MR, LDSC |
| 1677 | Breastfed as a baby                                     | MR, LDSC |
| 1687 | Comparative body size at age 10                         | MR, LDSC |
| 1697 | Comparative height size at age 10                       | MR, LDSC |
| 1767 | Adopted as a child                                      | MR, LDSC |
| 1777 | Part of a multiple birth                                | MR, LDSC |
| 1787 | Maternal smoking around birth                           | MR, LDSC |
| 1797 | Father still alive                                      | MR, LDSC |
| 1807 | Father's age at death                                   | MR, LDSC |
| 1835 | Mother still alive                                      | MR, LDSC |
| 1873 | Number of full brothers                                 | MR, LDSC |
| 1883 | Number of full sisters                                  | MR, LDSC |
| 1920 | Mood swings                                             | MR, LDSC |
| 1930 | Miserableness                                           | MR, LDSC |
| 1940 | Irritability                                            | MR, LDSC |
| 1950 | Sensitivity / hurt feelings                             | MR, LDSC |
| 1960 | Fed-up feelings                                         | MR, LDSC |
| 1970 | Nervous feelings                                        | MR, LDSC |
| 1980 | Worrier / anxious feelings                              | MR, LDSC |
| 1990 | Tense / 'highly strung'                                 | MR, LDSC |
| 2000 | Worry too long after embarrassment                      | MR, LDSC |
| 2010 | Suffer from 'nerves'                                    | MR, LDSC |
| 2020 | Loneliness, isolation                                   | MR, LDSC |
| 2030 | Guilty feelings                                         | MR, LDSC |
| 2040 | Risk taking                                             | MR, LDSC |
| 2050 | Frequency of depressed mood in last 2 weeks             | MR, LDSC |
| 2060 | Frequency of unenthusiasm / disinterest in last 2 weeks | MR, LDSC |
| 2070 | Frequency of tenseness / restlessness in last 2 weeks   | MR, LDSC |
| 2080 | Frequency of tiredness / lethargy in last 2 weeks       | MR, LDSC |

|      |                                                                |          |
|------|----------------------------------------------------------------|----------|
| 2090 | Seen doctor (GP) for nerves, anxiety, tension or depression    | MR, LDSC |
| 2100 | Seen a psychiatrist for nerves, anxiety, tension or depression | MR, LDSC |
| 2178 | Overall health rating                                          | MR, LDSC |
| 2188 | Long-standing illness, disability or infirmity                 | MR, LDSC |
| 2207 | Wears glasses or contact lenses                                | MR, LDSC |
| 2227 | Other eye problems                                             | MR, LDSC |
| 2257 | Hearing difficulty/problems with background noise              | MR, LDSC |
| 2296 | Falls in the last year                                         | MR, LDSC |
| 2306 | Weight change compared with 1 year ago                         | MR, LDSC |
| 2316 | Wheeze or whistling in the chest in last year                  | MR, LDSC |
| 2335 | Chest pain or discomfort                                       | MR, LDSC |
| 2345 | Ever had bowel cancer screening                                | MR, LDSC |
| 2355 | Most recent bowel cancer screening                             | MR, LDSC |
| 2365 | Ever had prostate specific antigen (PSA) test                  | MR, LDSC |
| 2375 | Relative age of first facial hair                              | MR, LDSC |
| 2385 | Relative age voice broke                                       | MR, LDSC |
| 2405 | Number of children fathered                                    | MR, LDSC |
| 2415 | Had major operations                                           | MR, LDSC |
| 2443 | Diabetes diagnosed by doctor                                   | MR, LDSC |
| 2453 | Cancer diagnosed by doctor                                     | MR, LDSC |
| 2463 | Fractured/broken bones in last 5 years                         | MR, LDSC |
| 2473 | Other serious medical condition/disability diagnosed by doctor | MR, LDSC |
| 2492 | Taking other prescription medications                          | MR, LDSC |
| 2624 | Frequency of heavy DIY in last 4 weeks                         | MR, LDSC |
| 2634 | Duration of heavy DIY                                          | MR, LDSC |
| 2644 | Light smokers, at least 100 smokes in lifetime                 | MR, LDSC |
| 2674 | Ever had breast cancer screening / mammogram                   | MR, LDSC |
| 2684 | Years since last breast cancer screening / mammogram           | MR, LDSC |
| 2694 | Ever had cervical smear test                                   | MR, LDSC |
| 2704 | Years since last cervical smear test                           | MR, LDSC |

|      |                                                                         |          |
|------|-------------------------------------------------------------------------|----------|
| 2714 | Age when periods started (menarche)                                     | MR, LDSC |
| 2724 | Had menopause                                                           | MR, LDSC |
| 2734 | Number of live births                                                   | MR, LDSC |
| 2744 | Birth weight of first child                                             | MR, LDSC |
| 2754 | Age at first live birth                                                 | MR, LDSC |
| 2764 | Age at last live birth                                                  | MR, LDSC |
| 2774 | Ever had stillbirth, spontaneous miscarriage or termination             | MR, LDSC |
| 2784 | Ever taken oral contraceptive pill                                      | MR, LDSC |
| 2794 | Age started oral contraceptive pill                                     | MR, LDSC |
| 2814 | Ever used hormone-replacement therapy (HRT)                             | MR, LDSC |
| 2834 | Bilateral oophorectomy (both ovaries removed)                           | MR, LDSC |
| 2844 | Had other major operations                                              | MR, LDSC |
| 2887 | Number of cigarettes previously smoked daily                            | MR, LDSC |
| 2907 | Ever stopped smoking for 6+ months                                      | MR, LDSC |
| 2926 | Number of unsuccessful stop-smoking attempts                            | MR, LDSC |
| 2936 | Likelihood of resuming smoking                                          | MR, LDSC |
| 2956 | General pain for 3+ months                                              | MR       |
| 2986 | Started insulin within one year diagnosis of diabetes                   | MR, LDSC |
| 3005 | Fracture resulting from simple fall                                     | MR, LDSC |
| 3062 | Forced vital capacity (FVC)                                             | MR, LDSC |
| 3063 | Forced expiratory volume in 1-second (FEV1)                             | MR, LDSC |
| 3064 | Peak expiratory flow (PEF)                                              | MR, LDSC |
| 3079 | Pace-maker                                                              | MR, LDSC |
| 3090 | Used an inhaler for chest within last hour                              | MR, LDSC |
| 3159 | Smoked cigarette or pipe within last hour                               | MR, LDSC |
| 3393 | Hearing aid user                                                        | MR, LDSC |
| 3404 | Neck/shoulder pain for 3+ months                                        | MR, LDSC |
| 3414 | Hip pain for 3+ months                                                  | MR, LDSC |
| 3456 | Number of cigarettes currently smoked daily (current cigarette smokers) | MR, LDSC |
| 3466 | Time from waking to first cigarette                                     | MR, LDSC |

|      |                                                            |          |
|------|------------------------------------------------------------|----------|
| 3476 | Difficulty not smoking for 1 day                           | MR, LDSC |
| 3486 | Ever tried to stop smoking                                 | MR, LDSC |
| 3496 | Wants to stop smoking                                      | MR, LDSC |
| 3526 | Mother's age at death                                      | MR, LDSC |
| 3571 | Back pain for 3+ months                                    | MR, LDSC |
| 3591 | Ever had hysterectomy (womb removed)                       | MR, LDSC |
| 3606 | Chest pain or discomfort walking normally                  | MR, LDSC |
| 3616 | Chest pain due to walking ceases when standing still       | MR, LDSC |
| 3637 | Frequency of other exercises in last 4 weeks               | MR, LDSC |
| 3647 | Duration of other exercises                                | MR, LDSC |
| 3710 | Length of menstrual cycle                                  | MR, LDSC |
| 3731 | Former alcohol drinker                                     | MR, LDSC |
| 3741 | Stomach/abdominal pain for 3+ months                       | MR, LDSC |
| 3751 | Chest pain or discomfort when walking uphill or hurrying   | MR, LDSC |
| 3773 | Knee pain for 3+ months                                    | MR, LDSC |
| 3799 | Headaches for 3+ months                                    | MR, LDSC |
| 3829 | Number of stillbirths                                      | MR       |
| 3839 | Number of spontaneous miscarriages                         | MR, LDSC |
| 3849 | Number of pregnancy terminations                           | MR, LDSC |
| 3872 | Age of primiparous women at birth of child                 | MR, LDSC |
| 4041 | Gestational diabetes only                                  | MR, LDSC |
| 4067 | Facial pains for 3+ months                                 | MR       |
| 4079 | Diastolic blood pressure, automated reading                | MR, LDSC |
| 4080 | Systolic blood pressure, automated reading                 | MR, LDSC |
| 4106 | Heel bone mineral density (BMD) T-score, automated (left)  | MR, LDSC |
| 4125 | Heel bone mineral density (BMD) T-score, automated (right) | MR, LDSC |
| 4194 | Pulse rate                                                 | MR, LDSC |
| 4195 | Pulse wave reflection index                                | MR, LDSC |
| 4196 | Pulse wave peak to peak time                               | MR, LDSC |
| 4407 | Average monthly red wine intake                            | MR, LDSC |

|      |                                                    |          |
|------|----------------------------------------------------|----------|
| 4418 | Average monthly champagne plus white wine intake   | MR, LDSC |
| 4429 | Average monthly beer plus cider intake             | MR, LDSC |
| 4440 | Average monthly spirits intake                     | MR, LDSC |
| 4451 | Average monthly fortified wine intake              | MR, LDSC |
| 4462 | Average monthly intake of other alcoholic drinks   | MR, LDSC |
| 4501 | Non-accidental death in close genetic family       | MR, LDSC |
| 4526 | Happiness                                          | MR, LDSC |
| 4537 | Work/job satisfaction                              | MR, LDSC |
| 4548 | Health satisfaction                                | MR, LDSC |
| 4559 | Family relationship satisfaction                   | MR, LDSC |
| 4570 | Friendships satisfaction                           | MR, LDSC |
| 4581 | Financial situation satisfaction                   | MR, LDSC |
| 4598 | Ever depressed for a whole week                    | MR, LDSC |
| 4609 | Longest period of depression                       | MR, LDSC |
| 4620 | Number of depression episodes                      | MR, LDSC |
| 4631 | Ever unenthusiastic/disinterested for a whole week | MR, LDSC |
| 4642 | Ever manic/hyper for 2 days                        | MR, LDSC |
| 4653 | Ever highly irritable/argumentative for 2 days     | MR, LDSC |
| 4717 | Shortness of breath walking on level ground        | MR, LDSC |
| 4728 | Leg pain on walking                                | MR, LDSC |
| 4792 | Cochlear implant                                   | MR, LDSC |
| 4814 | Tinnitus severity/nuisance                         | MR, LDSC |
| 4825 | Noisy workplace                                    | MR, LDSC |
| 4836 | Loud music exposure frequency                      | MR, LDSC |
| 5057 | Number of older siblings                           | MR, LDSC |
| 5364 | Average weekly intake of other alcoholic drinks    | MR, LDSC |
| 5375 | Longest period of unenthusiasm / disinterest       | MR, LDSC |
| 5386 | Number of unenthusiastic/disinterested episodes    | MR, LDSC |
| 5452 | Leg pain when standing still or sitting            | MR, LDSC |
| 5463 | Leg pain in calf/calves                            | MR, LDSC |



|       |                                                                   |          |
|-------|-------------------------------------------------------------------|----------|
| 5474  | Leg pain when walking uphill or hurrying                          | MR, LDSC |
| 5485  | Leg pain when walking normally                                    | MR, LDSC |
| 5496  | Leg pain when walking ever disappears while walking               | MR, LDSC |
| 5507  | Leg pain on walking: action taken                                 | MR, LDSC |
| 5518  | Leg pain on walking: effect of standing still                     | MR, LDSC |
| 5529  | Surgery on leg arteries (other than for varicose veins)           | MR, LDSC |
| 5663  | Length of longest manic/irritable episode                         | MR, LDSC |
| 5674  | Severity of manic/irritable episodes                              | MR       |
| 5959  | Previously smoked cigarettes on most/all days                     | MR       |
| 6015  | Chest pain felt during physical activity                          | MR, LDSC |
| 6016  | Chest pain felt outside physical activity                         | MR, LDSC |
| 6017  | Able to walk or cycle unaided for 10 minutes                      | MR, LDSC |
| 6032  | Maximum workload during fitness test                              | MR, LDSC |
| 6033  | Maximum heart rate during fitness test                            | MR, LDSC |
| 6034  | Target heart rate achieved                                        | MR, LDSC |
| 6038  | Number of trend entries                                           | MR, LDSC |
| 6039  | Duration of fitness test                                          | MR, LDSC |
| 20015 | Sitting height                                                    | MR, LDSC |
| 20016 | Fluid intelligence score                                          | MR, LDSC |
| 20018 | Prospective memory result                                         | MR, LDSC |
| 20022 | Birth weight                                                      | MR, LDSC |
| 20023 | Mean time to correctly identify matches                           | MR, LDSC |
| 20121 | Cascot confidence score                                           | MR       |
| 20122 | Bipolar disorder status                                           | MR, LDSC |
| 20127 | Neuroticism score                                                 | MR, LDSC |
| 20150 | Forced expiratory volume in 1-second (FEV1), Best measure         | MR, LDSC |
| 20151 | Forced vital capacity (FVC), Best measure                         | MR, LDSC |
| 20152 | Reproducibility of spirometry measurement using ERS/ATS criteria  | MR, LDSC |
| 20153 | Forced expiratory volume in 1-second (FEV1), predicted            | MR, LDSC |
| 20154 | Forced expiratory volume in 1-second (FEV1), predicted percentage | MR, LDSC |

|       |                                                                                     |          |
|-------|-------------------------------------------------------------------------------------|----------|
| 20160 | Ever smoked                                                                         | MR, LDSC |
| 20161 | Pack years of smoking PREVIEW ONLY                                                  | MR, LDSC |
| 20162 | Pack years adult smoking as proportion of life span exposed to smoking PREVIEW ONLY | MR, LDSC |
| 21001 | Body mass index (BMI)                                                               | MR, LDSC |
| 21002 | Weight                                                                              | MR, LDSC |
| 21021 | Pulse wave Arterial Stiffness index                                                 | MR, LDSC |
| 22126 | Doctor diagnosed hayfever or allergic rhinitis                                      | MR, LDSC |
| 22127 | Doctor diagnosed asthma                                                             | MR, LDSC |
| 22128 | Doctor diagnosed emphysema                                                          | MR, LDSC |
| 22129 | Doctor diagnosed chronic bronchitis                                                 | MR       |
| 22130 | Doctor diagnosed COPD (chronic obstructive pulmonary disease)                       | MR, LDSC |
| 22133 | Doctor diagnosed sarcoidosis                                                        | MR, LDSC |
| 22134 | Doctor diagnosed bronchiectasis                                                     | MR, LDSC |
| 22135 | Doctor diagnosed idiopathic pulmonary fibrosis                                      | MR, LDSC |
| 22137 | Doctor diagnosed tuberculosis                                                       | MR, LDSC |
| 22140 | Doctor diagnosed lung cancer (not mesothelioma)                                     | MR       |
| 22502 | Cough on most days                                                                  | MR, LDSC |
| 22503 | Years of cough on most days                                                         | MR, LDSC |
| 22504 | Bring up phlegm/sputum/mucus on most days                                           | MR, LDSC |
| 23099 | Body fat percentage                                                                 | MR, LDSC |
| 23100 | Whole body fat mass                                                                 | MR, LDSC |
| 23101 | Whole body fat-free mass                                                            | MR, LDSC |
| 23102 | Whole body water mass                                                               | MR, LDSC |
| 23105 | Basal metabolic rate                                                                | MR, LDSC |
| 23106 | Impedance of whole body                                                             | MR, LDSC |
| 23107 | Impedance of leg (right)                                                            | MR, LDSC |
| 23108 | Impedance of leg (left)                                                             | MR, LDSC |
| 23109 | Impedance of arm (right)                                                            | MR, LDSC |
| 23110 | Impedance of arm (left)                                                             | MR, LDSC |
| 23111 | Leg fat percentage (right)                                                          | MR, LDSC |

|            |                                                                          |          |
|------------|--------------------------------------------------------------------------|----------|
| 23112      | Leg fat mass (right)                                                     | MR, LDSC |
| 23113      | Leg fat-free mass (right)                                                | MR, LDSC |
| 23114      | Leg predicted mass (right)                                               | MR, LDSC |
| 23115      | Leg fat percentage (left)                                                | MR, LDSC |
| 23116      | Leg fat mass (left)                                                      | MR, LDSC |
| 23117      | Leg fat-free mass (left)                                                 | MR, LDSC |
| 23118      | Leg predicted mass (left)                                                | MR, LDSC |
| 23119      | Arm fat percentage (right)                                               | MR, LDSC |
| 23120      | Arm fat mass (right)                                                     | MR, LDSC |
| 23121      | Arm fat-free mass (right)                                                | MR, LDSC |
| 23122      | Arm predicted mass (right)                                               | MR, LDSC |
| 23123      | Arm fat percentage (left)                                                | MR, LDSC |
| 23124      | Arm fat mass (left)                                                      | MR, LDSC |
| 23125      | Arm fat-free mass (left)                                                 | MR, LDSC |
| 23126      | Arm predicted mass (left)                                                | MR, LDSC |
| 23127      | Trunk fat percentage                                                     | MR, LDSC |
| 23128      | Trunk fat mass                                                           | MR, LDSC |
| 23129      | Trunk fat-free mass                                                      | MR, LDSC |
| 23130      | Trunk predicted mass                                                     | MR, LDSC |
| 30510      | Creatinine (enzymatic) in urine                                          | MR, LDSC |
| 30520      | Potassium in urine                                                       | MR, LDSC |
| 30530      | Sodium in urine                                                          | MR, LDSC |
| 40007      | Age at death                                                             | MR       |
| 40009      | Reported occurrences of cancer                                           | MR, LDSC |
| 90088      | No-wear time bias adjusted acceleration standard deviation               | MR, LDSC |
| 1707_2     | Handedness (chirality/laterality): Left-handed                           | MR, LDSC |
| 1707_3     | Handedness (chirality/laterality): Use both right and left hands equally | MR, LDSC |
| 20001_1001 | Cancer code, self-reported: lung cancer                                  | MR, LDSC |
| 20001_1002 | Cancer code, self-reported: breast cancer                                | MR, LDSC |
| 20001_1003 | Cancer code, self-reported: skin cancer                                  | MR, LDSC |

|            |                                                                           |          |
|------------|---------------------------------------------------------------------------|----------|
| 20001_1004 | Cancer code, self-reported: cancer of lip/mouth/pharynx/oral cavity       | MR       |
| 20001_1006 | Cancer code, self-reported: larynx/throat cancer                          | MR       |
| 20001_1011 | Cancer code, self-reported: tongue cancer                                 | MR, LDSC |
| 20001_1017 | Cancer code, self-reported: oesophageal cancer                            | MR, LDSC |
| 20001_1018 | Cancer code, self-reported: stomach cancer                                | MR       |
| 20001_1019 | Cancer code, self-reported: small intestine/small bowel cancer            | MR, LDSC |
| 20001_1020 | Cancer code, self-reported: large bowel cancer/colorectal cancer          | MR       |
| 20001_1022 | Cancer code, self-reported: colon cancer/sigmoid cancer                   | MR, LDSC |
| 20001_1023 | Cancer code, self-reported: rectal cancer                                 | MR, LDSC |
| 20001_1024 | Cancer code, self-reported: liver/hepatocellular cancer                   | MR, LDSC |
| 20001_1030 | Cancer code, self-reported: eye and/or adnexal cancer                     | MR, LDSC |
| 20001_1032 | Cancer code, self-reported: brain cancer / primary malignant brain tumour | MR, LDSC |
| 20001_1034 | Cancer code, self-reported: kidney/renal cell cancer                      | MR, LDSC |
| 20001_1035 | Cancer code, self-reported: bladder cancer                                | MR, LDSC |
| 20001_1039 | Cancer code, self-reported: ovarian cancer                                | MR       |
| 20001_1040 | Cancer code, self-reported: uterine/endometrial cancer                    | MR, LDSC |
| 20001_1041 | Cancer code, self-reported: cervical cancer                               | MR, LDSC |
| 20001_1044 | Cancer code, self-reported: prostate cancer                               | MR, LDSC |
| 20001_1045 | Cancer code, self-reported: testicular cancer                             | MR, LDSC |
| 20001_1047 | Cancer code, self-reported: lymphoma                                      | MR       |
| 20001_1048 | Cancer code, self-reported: leukaemia                                     | MR       |
| 20001_1050 | Cancer code, self-reported: multiple myeloma                              | MR       |
| 20001_1052 | Cancer code, self-reported: hodgkins lymphoma / hodgkins disease          | MR       |
| 20001_1053 | Cancer code, self-reported: non-hodgkins lymphoma                         | MR       |
| 20001_1055 | Cancer code, self-reported: chronic lymphocytic                           | MR, LDSC |
| 20001_1056 | Cancer code, self-reported: chronic myeloid                               | MR, LDSC |
| 20001_1059 | Cancer code, self-reported: malignant melanoma                            | MR, LDSC |
| 20001_1060 | Cancer code, self-reported: non-melanoma skin cancer                      | MR       |
| 20001_1061 | Cancer code, self-reported: basal cell carcinoma                          | MR, LDSC |
| 20001_1062 | Cancer code, self-reported: squamous cell carcinoma                       | MR, LDSC |

|             |                                                                                     |          |
|-------------|-------------------------------------------------------------------------------------|----------|
| 20001_1063  | Cancer code, self-reported: primary bone cancer                                     | MR       |
| 20001_1065  | Cancer code, self-reported: thyroid cancer                                          | MR, LDSC |
| 20001_1068  | Cancer code, self-reported: sarcoma/fibrosarcoma                                    | MR, LDSC |
| 20001_1070  | Cancer code, self-reported: malignant lymph node, unspecified                       | MR       |
| 20001_1072  | Cancer code, self-reported: cin/pre-cancer cells cervix                             | MR, LDSC |
| 20001_1073  | Cancer code, self-reported: rodent ulcer                                            | MR, LDSC |
| 20001_99999 | Cancer code, self-reported: unclassifiable                                          | MR, LDSC |
| 20002_1065  | Non-cancer illness code, self-reported: hypertension                                | MR, LDSC |
| 20002_1066  | Non-cancer illness code, self-reported: heart/cardiac problem                       | MR       |
| 20002_1067  | Non-cancer illness code, self-reported: peripheral vascular disease                 | MR, LDSC |
| 20002_1068  | Non-cancer illness code, self-reported: venous thromboembolic disease               | MR, LDSC |
| 20002_1072  | Non-cancer illness code, self-reported: essential hypertension                      | MR       |
| 20002_1073  | Non-cancer illness code, self-reported: gestational hypertension/pre-eclampsia      | MR, LDSC |
| 20002_1074  | Non-cancer illness code, self-reported: angina                                      | MR, LDSC |
| 20002_1075  | Non-cancer illness code, self-reported: heart attack/myocardial infarction          | MR, LDSC |
| 20002_1076  | Non-cancer illness code, self-reported: heart failure/pulmonary odema               | MR, LDSC |
| 20002_1077  | Non-cancer illness code, self-reported: heart arrhythmia                            | MR       |
| 20002_1078  | Non-cancer illness code, self-reported: heart valve problem/heart murmur            | MR, LDSC |
| 20002_1079  | Non-cancer illness code, self-reported: cardiomyopathy                              | MR, LDSC |
| 20002_1080  | Non-cancer illness code, self-reported: pericardial problem                         | MR, LDSC |
| 20002_1081  | Non-cancer illness code, self-reported: stroke                                      | MR, LDSC |
| 20002_1082  | Non-cancer illness code, self-reported: transient ischaemic attack (tia)            | MR, LDSC |
| 20002_1083  | Non-cancer illness code, self-reported: subdural haemorrhage/haematoma              | MR       |
| 20002_1086  | Non-cancer illness code, self-reported: subarachnoid haemorrhage                    | MR       |
| 20002_1087  | Non-cancer illness code, self-reported: leg claudication/ intermittent claudication | MR, LDSC |
| 20002_1093  | Non-cancer illness code, self-reported: pulmonary embolism +/- dvt                  | MR, LDSC |
| 20002_1094  | Non-cancer illness code, self-reported: deep venous thrombosis (dvt)                | MR, LDSC |
| 20002_1111  | Non-cancer illness code, self-reported: asthma                                      | MR, LDSC |
| 20002_1112  | Non-cancer illness code, self-reported: chronic obstructive airways disease/copd    | MR, LDSC |
| 20002_1113  | Non-cancer illness code, self-reported: emphysema/chronic bronchitis                | MR, LDSC |

|            |                                                                                           |          |
|------------|-------------------------------------------------------------------------------------------|----------|
| 20002_1114 | Non-cancer illness code, self-reported: bronchiectasis                                    | MR, LDSC |
| 20002_1115 | Non-cancer illness code, self-reported: interstitial lung disease                         | MR, LDSC |
| 20002_1117 | Non-cancer illness code, self-reported: other respiratory problems                        | MR       |
| 20002_1120 | Non-cancer illness code, self-reported: asbestosis                                        | MR       |
| 20002_1121 | Non-cancer illness code, self-reported: pulmonary fibrosis                                | MR, LDSC |
| 20002_1122 | Non-cancer illness code, self-reported: fibrosing alveolitis/unspecified alveolitis       | MR, LDSC |
| 20002_1123 | Non-cancer illness code, self-reported: sleep apnoea                                      | MR, LDSC |
| 20002_1125 | Non-cancer illness code, self-reported: pleurisy                                          | MR, LDSC |
| 20002_1126 | Non-cancer illness code, self-reported: spontaneous pneumothorax/recurrent pneumothorax   | MR, LDSC |
| 20002_1134 | Non-cancer illness code, self-reported: oesophageal disorder                              | MR, LDSC |
| 20002_1135 | Non-cancer illness code, self-reported: stomach disorder                                  | MR, LDSC |
| 20002_1136 | Non-cancer illness code, self-reported: liver/biliary/pancreas problem                    | MR, LDSC |
| 20002_1137 | Non-cancer illness code, self-reported: other abdominal problem                           | MR, LDSC |
| 20002_1138 | Non-cancer illness code, self-reported: gastro-oesophageal reflux (gord) / gastric reflux | MR, LDSC |
| 20002_1139 | Non-cancer illness code, self-reported: oesophagitis/barretts oesophagus                  | MR, LDSC |
| 20002_1140 | Non-cancer illness code, self-reported: oesophageal stricture                             | MR       |
| 20002_1142 | Non-cancer illness code, self-reported: gastric/stomach ulcers                            | MR, LDSC |
| 20002_1143 | Non-cancer illness code, self-reported: gastritis/gastric erosions                        | MR       |
| 20002_1154 | Non-cancer illness code, self-reported: irritable bowel syndrome                          | MR, LDSC |
| 20002_1155 | Non-cancer illness code, self-reported: hepatitis                                         | MR       |
| 20002_1156 | Non-cancer illness code, self-reported: infective/viral hepatitis                         | MR       |
| 20002_1157 | Non-cancer illness code, self-reported: non-infective hepatitis                           | MR       |
| 20002_1158 | Non-cancer illness code, self-reported: liver failure/cirrhosis                           | MR, LDSC |
| 20002_1161 | Non-cancer illness code, self-reported: gall bladder disease                              | MR, LDSC |
| 20002_1162 | Non-cancer illness code, self-reported: cholelithiasis/gall stones                        | MR, LDSC |
| 20002_1163 | Non-cancer illness code, self-reported: cholecystitis                                     | MR       |
| 20002_1165 | Non-cancer illness code, self-reported: pancreatitis                                      | MR, LDSC |
| 20002_1190 | Non-cancer illness code, self-reported: peritonitis                                       | MR, LDSC |
| 20002_1191 | Non-cancer illness code, self-reported: gastrointestinal bleeding                         | MR, LDSC |
| 20002_1192 | Non-cancer illness code, self-reported: renal/kidney failure                              | MR       |

|            |                                                                                        |          |
|------------|----------------------------------------------------------------------------------------|----------|
| 20002_1193 | Non-cancer illness code, self-reported: renal failure requiring dialysis               | MR, LDSC |
| 20002_1194 | Non-cancer illness code, self-reported: renal failure not requiring dialysis           | MR, LDSC |
| 20002_1196 | Non-cancer illness code, self-reported: urinary tract infection/kidney infection       | MR, LDSC |
| 20002_1197 | Non-cancer illness code, self-reported: kidney stone/ureter stone/bladder stone        | MR, LDSC |
| 20002_1200 | Non-cancer illness code, self-reported: ureteric obstruction/hydronephrosis            | MR, LDSC |
| 20002_1201 | Non-cancer illness code, self-reported: bladder problem (not cancer)                   | MR, LDSC |
| 20002_1202 | Non-cancer illness code, self-reported: urinary frequency / incontinence               | MR, LDSC |
| 20002_1207 | Non-cancer illness code, self-reported: prostate problem (not cancer)                  | MR       |
| 20002_1214 | Non-cancer illness code, self-reported: testicular problems (not cancer)               | MR, LDSC |
| 20002_1220 | Non-cancer illness code, self-reported: diabetes                                       | MR, LDSC |
| 20002_1221 | Non-cancer illness code, self-reported: gestational diabetes                           | MR       |
| 20002_1222 | Non-cancer illness code, self-reported: type 1 diabetes                                | MR       |
| 20002_1223 | Non-cancer illness code, self-reported: type 2 diabetes                                | MR, LDSC |
| 20002_1224 | Non-cancer illness code, self-reported: thyroid problem (not cancer)                   | MR       |
| 20002_1225 | Non-cancer illness code, self-reported: hyperthyroidism/thyrototoxicosis               | MR       |
| 20002_1226 | Non-cancer illness code, self-reported: hypothyroidism/myxoedema                       | MR       |
| 20002_1228 | Non-cancer illness code, self-reported: thyroid radioablation therapy                  | MR       |
| 20002_1229 | Non-cancer illness code, self-reported: parathyroid gland problem (not cancer)         | MR       |
| 20002_1230 | Non-cancer illness code, self-reported: parathyroid hyperplasia/adenoma                | MR       |
| 20002_1234 | Non-cancer illness code, self-reported: adrenocortical insufficiency/addison's disease | MR       |
| 20002_1238 | Non-cancer illness code, self-reported: pituitary adenoma/tumour                       | MR, LDSC |
| 20002_1240 | Non-cancer illness code, self-reported: neurological injury/trauma                     | MR       |
| 20002_1242 | Non-cancer illness code, self-reported: eye/eyelid problem                             | MR, LDSC |
| 20002_1243 | Non-cancer illness code, self-reported: psychological/psychiatric problem              | MR       |
| 20002_1246 | Non-cancer illness code, self-reported: encephalitis                                   | MR, LDSC |
| 20002_1247 | Non-cancer illness code, self-reported: meningitis                                     | MR       |
| 20002_1249 | Non-cancer illness code, self-reported: cranial nerve problem/palsy                    | MR       |
| 20002_1250 | Non-cancer illness code, self-reported: bell's palsy/facial nerve palsy                | MR, LDSC |
| 20002_1251 | Non-cancer illness code, self-reported: spinal cord disorder                           | MR, LDSC |
| 20002_1254 | Non-cancer illness code, self-reported: peripheral nerve disorder                      | MR, LDSC |

|            |                                                                                              |          |
|------------|----------------------------------------------------------------------------------------------|----------|
| 20002_1255 | Non-cancer illness code, self-reported: peripheral neuropathy                                | MR       |
| 20002_1256 | Non-cancer illness code, self-reported: acute infective polyneuritis/guillain-barre syndrome | MR, LDSC |
| 20002_1257 | Non-cancer illness code, self-reported: trapped nerve/compressed nerve                       | MR, LDSC |
| 20002_1258 | Non-cancer illness code, self-reported: chronic/degenerative neurological problem            | MR       |
| 20002_1261 | Non-cancer illness code, self-reported: multiple sclerosis                                   | MR, LDSC |
| 20002_1262 | Non-cancer illness code, self-reported: parkinsons disease                                   | MR, LDSC |
| 20002_1263 | Non-cancer illness code, self-reported: dementia/alzheimers/cognitive impairment             | MR       |
| 20002_1264 | Non-cancer illness code, self-reported: epilepsy                                             | MR, LDSC |
| 20002_1265 | Non-cancer illness code, self-reported: migraine                                             | MR, LDSC |
| 20002_1266 | Non-cancer illness code, self-reported: head injury                                          | MR, LDSC |
| 20002_1267 | Non-cancer illness code, self-reported: spinal injury                                        | MR, LDSC |
| 20002_1274 | Non-cancer illness code, self-reported: eye infection                                        | MR       |
| 20002_1275 | Non-cancer illness code, self-reported: retinal problem                                      | MR       |
| 20002_1276 | Non-cancer illness code, self-reported: diabetic eye disease                                 | MR, LDSC |
| 20002_1277 | Non-cancer illness code, self-reported: glaucoma                                             | MR, LDSC |
| 20002_1278 | Non-cancer illness code, self-reported: cataract                                             | MR, LDSC |
| 20002_1279 | Non-cancer illness code, self-reported: eye trauma                                           | MR       |
| 20002_1281 | Non-cancer illness code, self-reported: retinal detachment                                   | MR, LDSC |
| 20002_1282 | Non-cancer illness code, self-reported: retinal artery/vein occlusion                        | MR, LDSC |
| 20002_1286 | Non-cancer illness code, self-reported: depression                                           | MR, LDSC |
| 20002_1287 | Non-cancer illness code, self-reported: anxiety/panic attacks                                | MR, LDSC |
| 20002_1288 | Non-cancer illness code, self-reported: nervous breakdown                                    | MR       |
| 20002_1289 | Non-cancer illness code, self-reported: schizophrenia                                        | MR       |
| 20002_1290 | Non-cancer illness code, self-reported: deliberate self-harm/suicide attempt                 | MR       |
| 20002_1291 | Non-cancer illness code, self-reported: mania/bipolar disorder/manic depression              | MR, LDSC |
| 20002_1293 | Non-cancer illness code, self-reported: bone disorder                                        | MR, LDSC |
| 20002_1294 | Non-cancer illness code, self-reported: back problem                                         | MR, LDSC |
| 20002_1295 | Non-cancer illness code, self-reported: joint disorder                                       | MR, LDSC |
| 20002_1297 | Non-cancer illness code, self-reported: muscle/soft tissue problem                           | MR, LDSC |
| 20002_1308 | Non-cancer illness code, self-reported: osteomyelitis                                        | MR       |



|            |                                                                                        |          |
|------------|----------------------------------------------------------------------------------------|----------|
| 20002_1309 | Non-cancer illness code, self-reported: osteoporosis                                   | MR, LDSC |
| 20002_1311 | Non-cancer illness code, self-reported: spine arthritis/spondylitis                    | MR, LDSC |
| 20002_1312 | Non-cancer illness code, self-reported: prolapsed disc/slipped disc                    | MR, LDSC |
| 20002_1313 | Non-cancer illness code, self-reported: ankylosing spondylitis                         | MR, LDSC |
| 20002_1322 | Non-cancer illness code, self-reported: myositis/myopathy                              | MR       |
| 20002_1327 | Non-cancer illness code, self-reported: low platelets/platelet disorder                | MR       |
| 20002_1330 | Non-cancer illness code, self-reported: iron deficiency anaemia                        | MR, LDSC |
| 20002_1331 | Non-cancer illness code, self-reported: pernicious anaemia                             | MR, LDSC |
| 20002_1340 | Non-cancer illness code, self-reported: thalassaemia                                   | MR       |
| 20002_1348 | Non-cancer illness code, self-reported: gynaecological disorder (not cancer)           | MR       |
| 20002_1349 | Non-cancer illness code, self-reported: ovarian cyst or cysts                          | MR, LDSC |
| 20002_1350 | Non-cancer illness code, self-reported: polycystic ovaries/polycystic ovarian syndrome | MR, LDSC |
| 20002_1351 | Non-cancer illness code, self-reported: uterine fibroids                               | MR, LDSC |
| 20002_1352 | Non-cancer illness code, self-reported: uterine polyps                                 | MR       |
| 20002_1353 | Non-cancer illness code, self-reported: vaginal prolapse/uterine prolapse              | MR, LDSC |
| 20002_1364 | Non-cancer illness code, self-reported: breast disease (not cancer)                    | MR       |
| 20002_1366 | Non-cancer illness code, self-reported: fibrocystic disease                            | MR       |
| 20002_1367 | Non-cancer illness code, self-reported: breast cysts                                   | MR, LDSC |
| 20002_1371 | Non-cancer illness code, self-reported: sarcoidosis                                    | MR, LDSC |
| 20002_1372 | Non-cancer illness code, self-reported: vasculitis                                     | MR       |
| 20002_1373 | Non-cancer illness code, self-reported: connective tissue disorder                     | MR       |
| 20002_1374 | Non-cancer illness code, self-reported: allergy/hypersensitivity/anaphylaxis           | MR       |
| 20002_1376 | Non-cancer illness code, self-reported: giant cell/temporal arteritis                  | MR       |
| 20002_1377 | Non-cancer illness code, self-reported: polymyalgia rheumatica                         | MR, LDSC |
| 20002_1378 | Non-cancer illness code, self-reported: wegners granulomatosis                         | MR       |
| 20002_1381 | Non-cancer illness code, self-reported: systemic lupus erythematosus/sle               | MR, LDSC |
| 20002_1382 | Non-cancer illness code, self-reported: sjogren's syndrome/sicca syndrome              | MR       |
| 20002_1384 | Non-cancer illness code, self-reported: scleroderma/systemic sclerosis                 | MR       |
| 20002_1385 | Non-cancer illness code, self-reported: allergy or anaphylactic reaction to food       | MR, LDSC |
| 20002_1386 | Non-cancer illness code, self-reported: allergy or anaphylactic reaction to drug       | MR, LDSC |

|            |                                                                        |          |
|------------|------------------------------------------------------------------------|----------|
| 20002_1387 | Non-cancer illness code, self-reported: hayfever/allergic rhinitis     | MR, LDSC |
| 20002_1394 | Non-cancer illness code, self-reported: peripheral nerve injury        | MR, LDSC |
| 20002_1396 | Non-cancer illness code, self-reported: enlarged prostate              | MR, LDSC |
| 20002_1398 | Non-cancer illness code, self-reported: pneumonia                      | MR, LDSC |
| 20002_1400 | Non-cancer illness code, self-reported: peptic ulcer                   | MR, LDSC |
| 20002_1402 | Non-cancer illness code, self-reported: endometriosis                  | MR, LDSC |
| 20002_1403 | Non-cancer illness code, self-reported: female infertility             | MR       |
| 20002_1405 | Non-cancer illness code, self-reported: other renal/kidney problem     | MR, LDSC |
| 20002_1406 | Non-cancer illness code, self-reported: muscle or soft tissue injuries | MR, LDSC |
| 20002_1407 | Non-cancer illness code, self-reported: burns                          | MR, LDSC |
| 20002_1408 | Non-cancer illness code, self-reported: alcohol dependency             | MR, LDSC |
| 20002_1412 | Non-cancer illness code, self-reported: bronchitis                     | MR, LDSC |
| 20002_1413 | Non-cancer illness code, self-reported: nasal/sinus disorder           | MR       |
| 20002_1414 | Non-cancer illness code, self-reported: throat or larynx disorder      | MR       |
| 20002_1415 | Non-cancer illness code, self-reported: ear/vestibular disorder        | MR, LDSC |
| 20002_1416 | Non-cancer illness code, self-reported: chronic sinusitis              | MR       |
| 20002_1417 | Non-cancer illness code, self-reported: nasal polyps                   | MR, LDSC |
| 20002_1419 | Non-cancer illness code, self-reported: vocal cord polyp               | MR       |
| 20002_1420 | Non-cancer illness code, self-reported: otosclerosis                   | MR, LDSC |
| 20002_1421 | Non-cancer illness code, self-reported: meniere's disease              | MR, LDSC |
| 20002_1425 | Non-cancer illness code, self-reported: cerebral aneurysm              | MR, LDSC |
| 20002_1426 | Non-cancer illness code, self-reported: myocarditis                    | MR       |
| 20002_1427 | Non-cancer illness code, self-reported: polycystic kidney              | MR, LDSC |
| 20002_1428 | Non-cancer illness code, self-reported: thyroiditis                    | MR       |
| 20002_1430 | Non-cancer illness code, self-reported: hypopituitarism                | MR, LDSC |
| 20002_1433 | Non-cancer illness code, self-reported: cerebral palsy                 | MR       |
| 20002_1434 | Non-cancer illness code, self-reported: other neurological problem     | MR       |
| 20002_1435 | Non-cancer illness code, self-reported: optic neuritis                 | MR       |
| 20002_1436 | Non-cancer illness code, self-reported: headaches (not migraine)       | MR, LDSC |
| 20002_1437 | Non-cancer illness code, self-reported: myasthenia gravis              | MR       |

|            |                                                                                    |          |
|------------|------------------------------------------------------------------------------------|----------|
| 20002_1438 | Non-cancer illness code, self-reported: polycythaemia vera                         | MR, LDSC |
| 20002_1439 | Non-cancer illness code, self-reported: hiv/aids                                   | MR, LDSC |
| 20002_1440 | Non-cancer illness code, self-reported: tuberculosis (tb)                          | MR       |
| 20002_1441 | Non-cancer illness code, self-reported: malaria                                    | MR, LDSC |
| 20002_1442 | Non-cancer illness code, self-reported: helicobacter pylori                        | MR, LDSC |
| 20002_1445 | Non-cancer illness code, self-reported: clotting disorder/excessive bleeding       | MR, LDSC |
| 20002_1446 | Non-cancer illness code, self-reported: anaemia                                    | MR       |
| 20002_1448 | Non-cancer illness code, self-reported: neutropenia/lymphopenia                    | MR       |
| 20002_1451 | Non-cancer illness code, self-reported: hereditary/genetic haematological disorder | MR, LDSC |
| 20002_1452 | Non-cancer illness code, self-reported: eczema/dermatitis                          | MR, LDSC |
| 20002_1453 | Non-cancer illness code, self-reported: psoriasis                                  | MR, LDSC |
| 20002_1454 | Non-cancer illness code, self-reported: blistering/desquamating skin disorder      | MR, LDSC |
| 20002_1455 | Non-cancer illness code, self-reported: chronic skin ulcers                        | MR       |
| 20002_1456 | Non-cancer illness code, self-reported: malabsorption/coeliac disease              | MR, LDSC |
| 20002_1457 | Non-cancer illness code, self-reported: duodenal ulcer                             | MR, LDSC |
| 20002_1458 | Non-cancer illness code, self-reported: diverticular disease/diverticulitis        | MR, LDSC |
| 20002_1459 | Non-cancer illness code, self-reported: colitis/not crohns or ulcerative colitis   | MR       |
| 20002_1460 | Non-cancer illness code, self-reported: rectal or colon adenoma/polyps             | MR       |
| 20002_1461 | Non-cancer illness code, self-reported: inflammatory bowel disease                 | MR, LDSC |
| 20002_1462 | Non-cancer illness code, self-reported: crohns disease                             | MR, LDSC |
| 20002_1463 | Non-cancer illness code, self-reported: ulcerative colitis                         | MR, LDSC |
| 20002_1464 | Non-cancer illness code, self-reported: rheumatoid arthritis                       | MR, LDSC |
| 20002_1465 | Non-cancer illness code, self-reported: osteoarthritis                             | MR, LDSC |
| 20002_1466 | Non-cancer illness code, self-reported: gout                                       | MR, LDSC |
| 20002_1467 | Non-cancer illness code, self-reported: other joint disorder                       | MR, LDSC |
| 20002_1468 | Non-cancer illness code, self-reported: diabetic neuropathy/ulcers                 | MR       |
| 20002_1469 | Non-cancer illness code, self-reported: post-traumatic stress disorder             | MR       |
| 20002_1470 | Non-cancer illness code, self-reported: anorexia/bulimia/other eating disorder     | MR, LDSC |
| 20002_1471 | Non-cancer illness code, self-reported: atrial fibrillation                        | MR, LDSC |
| 20002_1472 | Non-cancer illness code, self-reported: emphysema                                  | MR, LDSC |

|            |                                                                            |          |
|------------|----------------------------------------------------------------------------|----------|
| 20002_1473 | Non-cancer illness code, self-reported: high cholesterol                   | MR, LDSC |
| 20002_1474 | Non-cancer illness code, self-reported: hiatus hernia                      | MR, LDSC |
| 20002_1476 | Non-cancer illness code, self-reported: sciatica                           | MR, LDSC |
| 20002_1477 | Non-cancer illness code, self-reported: psoriatic arthropathy              | MR, LDSC |
| 20002_1478 | Non-cancer illness code, self-reported: cervical spondylosis               | MR, LDSC |
| 20002_1479 | Non-cancer illness code, self-reported: rheumatic fever                    | MR, LDSC |
| 20002_1482 | Non-cancer illness code, self-reported: chronic fatigue syndrome           | MR, LDSC |
| 20002_1485 | Non-cancer illness code, self-reported: irregular heart beat               | MR       |
| 20002_1487 | Non-cancer illness code, self-reported: svt / supraventricular tachycardia | MR       |
| 20002_1491 | Non-cancer illness code, self-reported: brain haemorrhage                  | MR, LDSC |
| 20002_1494 | Non-cancer illness code, self-reported: varicose veins                     | MR, LDSC |
| 20002_1495 | Non-cancer illness code, self-reported: lymphoedema                        | MR       |
| 20002_1497 | Non-cancer illness code, self-reported: pneumothorax                       | MR, LDSC |
| 20002_1499 | Non-cancer illness code, self-reported: labyrinthitis                      | MR, LDSC |
| 20002_1500 | Non-cancer illness code, self-reported: vertigo                            | MR, LDSC |
| 20002_1501 | Non-cancer illness code, self-reported: pyloric stenosis                   | MR, LDSC |
| 20002_1502 | Non-cancer illness code, self-reported: appendicitis                       | MR, LDSC |
| 20002_1503 | Non-cancer illness code, self-reported: anal problem                       | MR, LDSC |
| 20002_1504 | Non-cancer illness code, self-reported: anal fissure                       | MR       |
| 20002_1505 | Non-cancer illness code, self-reported: haemorrhoids / piles               | MR, LDSC |
| 20002_1508 | Non-cancer illness code, self-reported: jaundice (unknown cause)           | MR       |
| 20002_1509 | Non-cancer illness code, self-reported: gastroenteritis/dysentery          | MR       |
| 20002_1510 | Non-cancer illness code, self-reported: dyspepsia / indigestion            | MR       |
| 20002_1511 | Non-cancer illness code, self-reported: abdominal hernia                   | MR, LDSC |
| 20002_1512 | Non-cancer illness code, self-reported: umbilical hernia                   | MR, LDSC |
| 20002_1513 | Non-cancer illness code, self-reported: inguinal hernia                    | MR, LDSC |
| 20002_1514 | Non-cancer illness code, self-reported: cystitis                           | MR       |
| 20002_1516 | Non-cancer illness code, self-reported: bph / benign prostatic hypertrophy | MR, LDSC |
| 20002_1517 | Non-cancer illness code, self-reported: prostatitis                        | MR       |
| 20002_1518 | Non-cancer illness code, self-reported: erectile dysfunction / impotence   | MR, LDSC |

|            |                                                                                                               |          |
|------------|---------------------------------------------------------------------------------------------------------------|----------|
| 20002_1522 | Non-cancer illness code, self-reported: grave's disease                                                       | MR       |
| 20002_1523 | Non-cancer illness code, self-reported: trigeminal neuralgia                                                  | MR, LDSC |
| 20002_1525 | Non-cancer illness code, self-reported: benign / essential tremor                                             | MR       |
| 20002_1526 | Non-cancer illness code, self-reported: polio / poliomyelitis                                                 | MR, LDSC |
| 20002_1528 | Non-cancer illness code, self-reported: macular degeneration                                                  | MR       |
| 20002_1529 | Non-cancer illness code, self-reported: dry eyes                                                              | MR, LDSC |
| 20002_1530 | Non-cancer illness code, self-reported: iritis                                                                | MR, LDSC |
| 20002_1531 | Non-cancer illness code, self-reported: post-natal depression                                                 | MR, LDSC |
| 20002_1532 | Non-cancer illness code, self-reported: disc problem                                                          | MR, LDSC |
| 20002_1533 | Non-cancer illness code, self-reported: disc degeneration                                                     | MR       |
| 20002_1534 | Non-cancer illness code, self-reported: back pain                                                             | MR       |
| 20002_1535 | Non-cancer illness code, self-reported: scoliosis                                                             | MR       |
| 20002_1536 | Non-cancer illness code, self-reported: spinal stenosis                                                       | MR       |
| 20002_1537 | Non-cancer illness code, self-reported: joint pain                                                            | MR       |
| 20002_1538 | Non-cancer illness code, self-reported: arthritis (nos)                                                       | MR, LDSC |
| 20002_1540 | Non-cancer illness code, self-reported: plantar fasciitis                                                     | MR       |
| 20002_1541 | Non-cancer illness code, self-reported: carpal tunnel syndrome                                                | MR, LDSC |
| 20002_1542 | Non-cancer illness code, self-reported: fibromyalgia                                                          | MR       |
| 20002_1544 | Non-cancer illness code, self-reported: dupuytren's contracture                                               | MR, LDSC |
| 20002_1545 | Non-cancer illness code, self-reported: neck problem/injury                                                   | MR       |
| 20002_1548 | Non-cancer illness code, self-reported: acne/acne vulgaris                                                    | MR, LDSC |
| 20002_1549 | Non-cancer illness code, self-reported: lichen planus                                                         | MR       |
| 20002_1550 | Non-cancer illness code, self-reported: lichen sclerosis                                                      | MR       |
| 20002_1554 | Non-cancer illness code, self-reported: cervical intra-epithelial neoplasia (cin) / precancerous cells cervix | MR       |
| 20002_1555 | Non-cancer illness code, self-reported: cervical polyps                                                       | MR, LDSC |
| 20002_1556 | Non-cancer illness code, self-reported: menorrhagia (unknown cause)                                           | MR, LDSC |
| 20002_1558 | Non-cancer illness code, self-reported: ectopic pregnancy                                                     | MR       |
| 20002_1559 | Non-cancer illness code, self-reported: miscarriage                                                           | MR, LDSC |
| 20002_1560 | Non-cancer illness code, self-reported: breast fibroadenoma                                                   | MR, LDSC |
| 20002_1561 | Non-cancer illness code, self-reported: raynaud's phenomenon/disease                                          | MR, LDSC |

|            |                                                                                                               |          |
|------------|---------------------------------------------------------------------------------------------------------------|----------|
| 20002_1562 | Non-cancer illness code, self-reported: food intolerance                                                      | MR       |
| 20002_1563 | Non-cancer illness code, self-reported: urticaria                                                             | MR, LDSC |
| 20002_1567 | Non-cancer illness code, self-reported: infectious mononucleosis / glandular fever / epstein barr virus (ebv) | MR, LDSC |
| 20002_1568 | Non-cancer illness code, self-reported: measles / morbillivirus                                               | MR, LDSC |
| 20002_1569 | Non-cancer illness code, self-reported: mumps / epidemic parotitis                                            | MR       |
| 20002_1570 | Non-cancer illness code, self-reported: rubella / german measles                                              | MR       |
| 20002_1571 | Non-cancer illness code, self-reported: chickenpox                                                            | MR, LDSC |
| 20002_1572 | Non-cancer illness code, self-reported: whooping cough / pertussis                                            | MR       |
| 20002_1573 | Non-cancer illness code, self-reported: shingles                                                              | MR       |
| 20002_1575 | Non-cancer illness code, self-reported: herpes simplex                                                        | MR       |
| 20002_1578 | Non-cancer illness code, self-reported: hepatitis a                                                           | MR, LDSC |
| 20002_1579 | Non-cancer illness code, self-reported: hepatitis b                                                           | MR, LDSC |
| 20002_1580 | Non-cancer illness code, self-reported: hepatitis c                                                           | MR       |
| 20002_1585 | Non-cancer illness code, self-reported: mitral regurgitation / incompetence                                   | MR       |
| 20002_1587 | Non-cancer illness code, self-reported: aortic regurgitation / incompetence                                   | MR       |
| 20002_1588 | Non-cancer illness code, self-reported: hypertrophic cardiomyopathy (hcm / hocm)                              | MR, LDSC |
| 20002_1589 | Non-cancer illness code, self-reported: pericarditis                                                          | MR, LDSC |
| 20002_1594 | Non-cancer illness code, self-reported: respiratory infection                                                 | MR       |
| 20002_1597 | Non-cancer illness code, self-reported: tinnitus / tinitis                                                    | MR       |
| 20002_1598 | Non-cancer illness code, self-reported: tonsillitis                                                           | MR       |
| 20002_1599 | Non-cancer illness code, self-reported: constipation                                                          | MR       |
| 20002_1602 | Non-cancer illness code, self-reported: bowel / intestinal obstruction                                        | MR, LDSC |
| 20002_1603 | Non-cancer illness code, self-reported: rectal prolapse                                                       | MR       |
| 20002_1605 | Non-cancer illness code, self-reported: femoral hernia                                                        | MR, LDSC |
| 20002_1606 | Non-cancer illness code, self-reported: incisional hernia                                                     | MR       |
| 20002_1608 | Non-cancer illness code, self-reported: nephritis                                                             | MR, LDSC |
| 20002_1610 | Non-cancer illness code, self-reported: thyroid goitre                                                        | MR, LDSC |
| 20002_1613 | Non-cancer illness code, self-reported: blepharitis / eyelid infection                                        | MR       |
| 20002_1614 | Non-cancer illness code, self-reported: stress                                                                | MR       |
| 20002_1615 | Non-cancer illness code, self-reported: obsessive compulsive disorder (ocd)                                   | MR, LDSC |

|            |                                                                                                 |          |
|------------|-------------------------------------------------------------------------------------------------|----------|
| 20002_1616 | Non-cancer illness code, self-reported: insomnia                                                | MR       |
| 20002_1617 | Non-cancer illness code, self-reported: osteopenia                                              | MR, LDSC |
| 20002_1618 | Non-cancer illness code, self-reported: soft tissue inflammation                                | MR       |
| 20002_1619 | Non-cancer illness code, self-reported: tendonitis / tendinitis / tenosynovitis                 | MR, LDSC |
| 20002_1620 | Non-cancer illness code, self-reported: bursitis                                                | MR, LDSC |
| 20002_1623 | Non-cancer illness code, self-reported: tennis elbow / lateral epicondylitis                    | MR, LDSC |
| 20002_1625 | Non-cancer illness code, self-reported: cellulitis                                              | MR, LDSC |
| 20002_1626 | Non-cancer illness code, self-reported: fracture skull / head                                   | MR, LDSC |
| 20002_1627 | Non-cancer illness code, self-reported: fracture jaw                                            | MR       |
| 20002_1628 | Non-cancer illness code, self-reported: fracture nose                                           | MR       |
| 20002_1629 | Non-cancer illness code, self-reported: fracture face / orbit / eye socket                      | MR       |
| 20002_1631 | Non-cancer illness code, self-reported: fracture clavicle / collar bone                         | MR       |
| 20002_1632 | Non-cancer illness code, self-reported: fracture shoulder / scapula                             | MR, LDSC |
| 20002_1633 | Non-cancer illness code, self-reported: fracture upper arm / humerus / elbow                    | MR, LDSC |
| 20002_1634 | Non-cancer illness code, self-reported: fracture forearm / wrist                                | MR, LDSC |
| 20002_1635 | Non-cancer illness code, self-reported: fracture radius                                         | MR       |
| 20002_1636 | Non-cancer illness code, self-reported: fracture ulna                                           | MR       |
| 20002_1637 | Non-cancer illness code, self-reported: fracture wrist / colles fracture                        | MR       |
| 20002_1638 | Non-cancer illness code, self-reported: fracture hand                                           | MR       |
| 20002_1639 | Non-cancer illness code, self-reported: fracture finger                                         | MR, LDSC |
| 20002_1640 | Non-cancer illness code, self-reported: fracture thumb                                          | MR       |
| 20002_1644 | Non-cancer illness code, self-reported: fracture rib                                            | MR       |
| 20002_1646 | Non-cancer illness code, self-reported: fracture vertebra / crush fracture / vertebral collapse | MR, LDSC |
| 20002_1647 | Non-cancer illness code, self-reported: fracture pelvis                                         | MR       |
| 20002_1648 | Non-cancer illness code, self-reported: fracture neck of femur / hip                            | MR, LDSC |
| 20002_1649 | Non-cancer illness code, self-reported: fracture shaft of femur                                 | MR, LDSC |
| 20002_1650 | Non-cancer illness code, self-reported: fracture patella / knee                                 | MR       |
| 20002_1651 | Non-cancer illness code, self-reported: fracture lower leg / ankle                              | MR, LDSC |
| 20002_1652 | Non-cancer illness code, self-reported: fracture tibia                                          | MR       |
| 20002_1653 | Non-cancer illness code, self-reported: fracture fibula                                         | MR       |

|                  |                                                                              |          |
|------------------|------------------------------------------------------------------------------|----------|
| 20002_1654       | Non-cancer illness code, self-reported: fracture foot                        | MR, LDSC |
| 20002_1655       | Non-cancer illness code, self-reported: fracture metatarsal                  | MR       |
| 20002_1656       | Non-cancer illness code, self-reported: fracture toe                         | MR       |
| 20002_1657       | Non-cancer illness code, self-reported: septicaemia / sepsis                 | MR       |
| 20002_1659       | Non-cancer illness code, self-reported: meningioma / benign meningeal tumour | MR       |
| 20002_1660       | Non-cancer illness code, self-reported: rosacea                              | MR, LDSC |
| 20002_1661       | Non-cancer illness code, self-reported: vitiligo                             | MR, LDSC |
| 20002_1662       | Non-cancer illness code, self-reported: cervical erosion                     | MR, LDSC |
| 20002_1663       | Non-cancer illness code, self-reported: abnormal smear (cervix)              | MR, LDSC |
| 20002_1664       | Non-cancer illness code, self-reported: dysmenorrhoea / dysmenorrhea         | MR       |
| 20002_1665       | Non-cancer illness code, self-reported: menopausal symptoms / menopause      | MR       |
| 20002_1666       | Non-cancer illness code, self-reported: benign breast lump                   | MR, LDSC |
| 20002_1667       | Non-cancer illness code, self-reported: alopecia / hair loss                 | MR       |
| 20002_1668       | Non-cancer illness code, self-reported: allergy to house dust mite           | MR       |
| 20002_1677       | Non-cancer illness code, self-reported: scarlet fever / scarlatina           | MR, LDSC |
| 20002_1679       | Non-cancer illness code, self-reported: undescended testicle                 | MR       |
| 20002_1683       | Non-cancer illness code, self-reported: benign neuroma                       | MR, LDSC |
| 20002_99999      | Non-cancer illness code, self-reported: unclassifiable                       | MR, LDSC |
| 20003_1140851088 | Treatment/medication code: senokot 7.5mg tablet                              | MR, LDSC |
| 20003_1140851812 | Treatment/medication code: gtn 400micrograms spray                           | MR, LDSC |
| 20003_1140852756 | Treatment/medication code: vitamin a                                         | MR, LDSC |
| 20003_1140852766 | Treatment/medication code: vitamin a+d capsule                               | MR       |
| 20003_1140852948 | Treatment/medication code: calcium+vitamin d 500units tablet                 | MR, LDSC |
| 20003_1140852976 | Treatment/medication code: multivitamins                                     | MR, LDSC |
| 20003_1140853200 | Treatment/medication code: bromelains                                        | MR       |
| 20003_1140854076 | Treatment/medication code: macrogol ointment                                 | MR, LDSC |
| 20003_1140855380 | Treatment/medication code: salbuvent 100micrograms inhaler                   | MR       |
| 20003_1140856342 | Treatment/medication code: syndol tablet                                     | MR       |
| 20003_1140857620 | Treatment/medication code: depo-provera 50mg/1ml injection                   | MR       |
| 20003_1140857636 | Treatment/medication code: prempak 0.625 tablet                              | MR, LDSC |



|                  |                                                                                     |          |
|------------------|-------------------------------------------------------------------------------------|----------|
| 20003_1140858452 | Treatment/medication code: hepacon b12 1mg/1ml injection                            | MR, LDSC |
| 20003_1140860690 | Treatment/medication code: cardura 1mg tablet                                       | MR, LDSC |
| 20003_1140860696 | Treatment/medication code: lisinopril                                               | MR, LDSC |
| 20003_1140860728 | Treatment/medication code: quinapril                                                | MR       |
| 20003_1140860750 | Treatment/medication code: captopril                                                | MR, LDSC |
| 20003_1140860790 | Treatment/medication code: enalapril maleate+hydrochlorothiazide 20mg/12.5mg tablet | MR, LDSC |
| 20003_1140860802 | Treatment/medication code: coversyl 2mg tablet                                      | MR       |
| 20003_1140860806 | Treatment/medication code: ramipril                                                 | MR, LDSC |
| 20003_1140860834 | Treatment/medication code: glyceryl trinitrate                                      | MR, LDSC |
| 20003_1140860840 | Treatment/medication code: nitrolingual 400micrograms spray                         | MR, LDSC |
| 20003_1140860904 | Treatment/medication code: trandolapril                                             | MR, LDSC |
| 20003_1140860954 | Treatment/medication code: isosorbide mononitrate                                   | MR, LDSC |
| 20003_1140860976 | Treatment/medication code: imdur 60mg durule                                        | MR, LDSC |
| 20003_1140861008 | Treatment/medication code: isosorbide dinitrate                                     | MR, LDSC |
| 20003_1140861088 | Treatment/medication code: nifedipine                                               | MR, LDSC |
| 20003_1140861090 | Treatment/medication code: adalat 5mg capsule                                       | MR, LDSC |
| 20003_1140861120 | Treatment/medication code: coracten sr 10mg m/r capsule                             | MR       |
| 20003_1140861128 | Treatment/medication code: tildiem 60mg m/r tablet                                  | MR, LDSC |
| 20003_1140861138 | Treatment/medication code: adizem-60 m/r tablet                                     | MR       |
| 20003_1140861166 | Treatment/medication code: dilzem sr 60mg long acting m/r capsule                   | MR       |
| 20003_1140861202 | Treatment/medication code: istin 5mg tablet                                         | MR       |
| 20003_1140861276 | Treatment/medication code: lacidipine                                               | MR, LDSC |
| 20003_1140861778 | Treatment/medication code: dipyridamole                                             | MR, LDSC |
| 20003_1140861780 | Treatment/medication code: persantin 25mg tablet                                    | MR       |
| 20003_1140861806 | Treatment/medication code: aspirin 75mg tablet                                      | MR       |
| 20003_1140861832 | Treatment/medication code: tranexamic acid                                          | MR, LDSC |
| 20003_1140861924 | Treatment/medication code: bezafibrate                                              | MR, LDSC |
| 20003_1140861936 | Treatment/medication code: questran 4g/sachet powder                                | MR       |
| 20003_1140861954 | Treatment/medication code: fenofibrate                                              | MR, LDSC |
| 20003_1140861958 | Treatment/medication code: simvastatin                                              | MR, LDSC |

|                  |                                                                   |          |
|------------------|-------------------------------------------------------------------|----------|
| 20003_1140861998 | Treatment/medication code: ventolin 100micrograms inhaler         | MR, LDSC |
| 20003_1140862060 | Treatment/medication code: ventolin 2mg tablet                    | MR       |
| 20003_1140862086 | Treatment/medication code: salamol 100micrograms inhaler          | MR, LDSC |
| 20003_1140862144 | Treatment/medication code: salmeterol                             | MR, LDSC |
| 20003_1140862148 | Treatment/medication code: serevent 25mcg inhaler                 | MR, LDSC |
| 20003_1140862168 | Treatment/medication code: bricanyl 250mcg inhaler                | MR       |
| 20003_1140862236 | Treatment/medication code: atrovent 20micrograms inhaler          | MR, LDSC |
| 20003_1140862260 | Treatment/medication code: aminophylline                          | MR, LDSC |
| 20003_1140862266 | Treatment/medication code: phyllocontin continus 225mg m/r tablet | MR       |
| 20003_1140862380 | Treatment/medication code: becloforte 250micrograms inhaler       | MR       |
| 20003_1140862382 | Treatment/medication code: becotide 50 inhaler                    | MR, LDSC |
| 20003_1140862438 | Treatment/medication code: uniphyllin continus 200mg m/r tablet   | MR, LDSC |
| 20003_1140862476 | Treatment/medication code: beclazone 50 inhaler                   | MR, LDSC |
| 20003_1140862526 | Treatment/medication code: sodium cromoglycate                    | MR       |
| 20003_1140862572 | Treatment/medication code: budesonide                             | MR, LDSC |
| 20003_1140862574 | Treatment/medication code: pulmicort ls 50micrograms inhaler      | MR       |
| 20003_1140862628 | Treatment/medication code: piriton 4mg tablet                     | MR, LDSC |
| 20003_1140862760 | Treatment/medication code: acrivastine                            | MR, LDSC |
| 20003_1140862770 | Treatment/medication code: zirtek 10mg tablet                     | MR, LDSC |
| 20003_1140862772 | Treatment/medication code: loratadine                             | MR, LDSC |
| 20003_1140862776 | Treatment/medication code: clarityn 10mg tablet                   | MR       |
| 20003_1140862810 | Treatment/medication code: phenergan 10mg tablet                  | MR       |
| 20003_1140862944 | Treatment/medication code: carbocisteine                          | MR       |
| 20003_1140862952 | Treatment/medication code: mucodyne 375mg capsule                 | MR       |
| 20003_1140863144 | Treatment/medication code: zopiclone                              | MR       |
| 20003_1140863152 | Treatment/medication code: diazepam                               | MR, LDSC |
| 20003_1140863182 | Treatment/medication code: nitrazepam                             | MR, LDSC |
| 20003_1140863202 | Treatment/medication code: temazepam                              | MR, LDSC |
| 20003_1140863302 | Treatment/medication code: lorazepam                              | MR       |
| 20003_1140864070 | Treatment/medication code: kapake tablet                          | MR, LDSC |

|                  |                                                                                       |          |
|------------------|---------------------------------------------------------------------------------------|----------|
| 20003_1140864184 | Treatment/medication code: dovonex 50micrograms/g cream                               | MR, LDSC |
| 20003_1140864196 | Treatment/medication code: climagest 1mg tablet                                       | MR, LDSC |
| 20003_1140864286 | Treatment/medication code: flixotide 25micrograms inhaler                             | MR, LDSC |
| 20003_1140864472 | Treatment/medication code: xatral 2.5mg tablet                                        | MR       |
| 20003_1140864566 | Treatment/medication code: cabergoline                                                | MR       |
| 20003_1140864618 | Treatment/medication code: zestoretic 10 tablet                                       | MR       |
| 20003_1140864734 | Treatment/medication code: combivent inhaler                                          | MR       |
| 20003_1140864752 | Treatment/medication code: lansoprazole                                               | MR, LDSC |
| 20003_1140864950 | Treatment/medication code: bisoprolol fumarate+hydrochlorothiazide 10mg/6.25mg tablet | MR       |
| 20003_1140864952 | Treatment/medication code: lisinopril+hydrochlorothiazide 10mg/12.5mg tablet          | MR, LDSC |
| 20003_1140864966 | Treatment/medication code: salbutamol+ipratropium 100micrograms/20micrograms inhaler  | MR, LDSC |
| 20003_1140864992 | Treatment/medication code: tramadol                                                   | MR, LDSC |
| 20003_1140865000 | Treatment/medication code: zydol 50mg capsule                                         | MR, LDSC |
| 20003_1140865010 | Treatment/medication code: viscotears liquid eye gel                                  | MR       |
| 20003_1140865016 | Treatment/medication code: zolpidem                                                   | MR       |
| 20003_1140865336 | Treatment/medication code: spasmonal 60mg capsule                                     | MR, LDSC |
| 20003_1140865350 | Treatment/medication code: fybogel mebeverine sachet                                  | MR, LDSC |
| 20003_1140865354 | Treatment/medication code: gaviscon liquid                                            | MR, LDSC |
| 20003_1140865382 | Treatment/medication code: merbentyl 10mg tablet                                      | MR, LDSC |
| 20003_1140865394 | Treatment/medication code: hyoscine butylbromide                                      | MR, LDSC |
| 20003_1140865396 | Treatment/medication code: buscopan 10mg tablet                                       | MR, LDSC |
| 20003_1140865414 | Treatment/medication code: peppermint oil product                                     | MR       |
| 20003_1140865416 | Treatment/medication code: colpermin 0.2ml m/r gel e/c capsule                        | MR       |
| 20003_1140865426 | Treatment/medication code: cimetidine                                                 | MR       |
| 20003_1140865564 | Treatment/medication code: imodium 2mg capsule                                        | MR       |
| 20003_1140865578 | Treatment/medication code: mesalazine                                                 | MR, LDSC |
| 20003_1140865580 | Treatment/medication code: asacol 400mg e/c tablet                                    | MR, LDSC |
| 20003_1140865588 | Treatment/medication code: pentasa sr 250mg m/r tablet                                | MR       |
| 20003_1140865618 | Treatment/medication code: nizatidine                                                 | MR       |
| 20003_1140865634 | Treatment/medication code: omeprazole                                                 | MR, LDSC |

|                  |                                                                                     |          |
|------------------|-------------------------------------------------------------------------------------|----------|
| 20003_1140865654 | Treatment/medication code: codeine phosphate+kaolin 10mg/3g/10ml mixture            | MR       |
| 20003_1140865668 | Treatment/medication code: sulphasalazine                                           | MR, LDSC |
| 20003_1140865670 | Treatment/medication code: salazopyrin 500mg tablet                                 | MR, LDSC |
| 20003_1140865716 | Treatment/medication code: senna                                                    | MR, LDSC |
| 20003_1140865752 | Treatment/medication code: ispaghula husk                                           | MR       |
| 20003_1140865762 | Treatment/medication code: regulan 3.6g/sachet powder                               | MR       |
| 20003_1140865786 | Treatment/medication code: bisacodyl                                                | MR       |
| 20003_1140865800 | Treatment/medication code: lactulose product                                        | MR, LDSC |
| 20003_1140865816 | Treatment/medication code: anusol cream                                             | MR, LDSC |
| 20003_1140865872 | Treatment/medication code: magnesium citrate                                        | MR, LDSC |
| 20003_1140866026 | Treatment/medication code: creon e/c granules in capsule                            | MR, LDSC |
| 20003_1140866078 | Treatment/medication code: indapamide                                               | MR, LDSC |
| 20003_1140866116 | Treatment/medication code: frusemide                                                | MR       |
| 20003_1140866122 | Treatment/medication code: bendrofluazide                                           | MR, LDSC |
| 20003_1140866236 | Treatment/medication code: spironolactone                                           | MR, LDSC |
| 20003_1140866280 | Treatment/medication code: bumetanide                                               | MR       |
| 20003_1140866466 | Treatment/medication code: securon 40mg tablet                                      | MR, LDSC |
| 20003_1140866738 | Treatment/medication code: atenolol                                                 | MR, LDSC |
| 20003_1140866800 | Treatment/medication code: half-inalderal la 80mg m/r capsule                       | MR, LDSC |
| 20003_1140866804 | Treatment/medication code: inderal 10mg tablet                                      | MR       |
| 20003_1140867444 | Treatment/medication code: risperidone                                              | MR       |
| 20003_1140867490 | Treatment/medication code: lithium product                                          | MR       |
| 20003_1140867504 | Treatment/medication code: priadel 200mg m/r tablet                                 | MR, LDSC |
| 20003_1140867624 | Treatment/medication code: prothiaden 25mg capsule                                  | MR       |
| 20003_1140867726 | Treatment/medication code: lofepramine                                              | MR, LDSC |
| 20003_1140867818 | Treatment/medication code: nortriptyline                                            | MR, LDSC |
| 20003_1140867876 | Treatment/medication code: prozac 20mg capsule                                      | MR, LDSC |
| 20003_1140867878 | Treatment/medication code: sertraline                                               | MR       |
| 20003_1140867888 | Treatment/medication code: paroxetine                                               | MR, LDSC |
| 20003_1140867948 | Treatment/medication code: amitriptyline hydrochloride+perphenazine 10mg/2mg tablet | MR, LDSC |

|                  |                                                               |          |
|------------------|---------------------------------------------------------------|----------|
| 20003_1140867998 | Treatment/medication code: motilium 10mg tablet               | MR       |
| 20003_1140868064 | Treatment/medication code: serc-8 tablet                      | MR       |
| 20003_1140868080 | Treatment/medication code: cyclizine                          | MR, LDSC |
| 20003_1140868120 | Treatment/medication code: trifluoperazine                    | MR       |
| 20003_1140868170 | Treatment/medication code: prochlorperazine                   | MR, LDSC |
| 20003_1140868172 | Treatment/medication code: stemetil 5mg tablet                | MR       |
| 20003_1140868192 | Treatment/medication code: buccastem 3mg tablet               | MR       |
| 20003_1140868226 | Treatment/medication code: aspirin                            | MR, LDSC |
| 20003_1140868364 | Treatment/medication code: prednisone                         | MR, LDSC |
| 20003_1140868372 | Treatment/medication code: climaval 1mg tablet                | MR, LDSC |
| 20003_1140868406 | Treatment/medication code: conjugated oestrogens              | MR, LDSC |
| 20003_1140868408 | Treatment/medication code: premarin 625micrograms tablet      | MR, LDSC |
| 20003_1140868426 | Treatment/medication code: triamcinolone                      | MR       |
| 20003_1140868456 | Treatment/medication code: oestradiol product                 | MR       |
| 20003_1140868458 | Treatment/medication code: hormonin tablet                    | MR       |
| 20003_1140868460 | Treatment/medication code: progynova 1mg tablet               | MR, LDSC |
| 20003_1140868472 | Treatment/medication code: vagifem 25mcg pessary              | MR, LDSC |
| 20003_1140868482 | Treatment/medication code: tibolone                           | MR, LDSC |
| 20003_1140868514 | Treatment/medication code: trisequens tablet                  | MR       |
| 20003_1140868518 | Treatment/medication code: nuvelle tablet                     | MR       |
| 20003_1140868520 | Treatment/medication code: estracombi tts patch               | MR       |
| 20003_1140868532 | Treatment/medication code: testosterone product               | MR       |
| 20003_1140868538 | Treatment/medication code: sustanon 100 oily injection        | MR, LDSC |
| 20003_1140868550 | Treatment/medication code: finasteride                        | MR       |
| 20003_1140868580 | Treatment/medication code: norethisterone                     | MR       |
| 20003_1140868588 | Treatment/medication code: progesterone product               | MR       |
| 20003_1140868772 | Treatment/medication code: didronel 200mg tablet              | MR       |
| 20003_1140868816 | Treatment/medication code: desmopressin                       | MR       |
| 20003_1140869034 | Treatment/medication code: ortho-gynest 500micrograms pessary | MR, LDSC |
| 20003_1140869036 | Treatment/medication code: ovestin 0.1% vaginal cream         | MR       |

|                  |                                                                                       |          |
|------------------|---------------------------------------------------------------------------------------|----------|
| 20003_1140869162 | Treatment/medication code: marvelon tablet                                            | MR       |
| 20003_1140869164 | Treatment/medication code: mercilon tablet                                            | MR, LDSC |
| 20003_1140869176 | Treatment/medication code: logynon tablet                                             | MR, LDSC |
| 20003_1140869180 | Treatment/medication code: microgynon 30 tablet                                       | MR, LDSC |
| 20003_1140869276 | Treatment/medication code: micronor tablet                                            | MR       |
| 20003_1140869278 | Treatment/medication code: noriday tablet                                             | MR       |
| 20003_1140869324 | Treatment/medication code: loestrin 20 tablet                                         | MR       |
| 20003_1140869346 | Treatment/medication code: cilest tablet                                              | MR       |
| 20003_1140869362 | Treatment/medication code: femulen tablet                                             | MR       |
| 20003_1140869370 | Treatment/medication code: norgeston tablet                                           | MR, LDSC |
| 20003_1140869848 | Treatment/medication code: methotrexate                                               | MR       |
| 20003_1140869930 | Treatment/medication code: azathioprine                                               | MR, LDSC |
| 20003_1140870164 | Treatment/medication code: tamoxifen                                                  | MR, LDSC |
| 20003_1140870196 | Treatment/medication code: zoladex 3.6mg implant                                      | MR       |
| 20003_1140870306 | Treatment/medication code: iron+folic acid                                            | MR       |
| 20003_1140870390 | Treatment/medication code: ferrous sulphate                                           | MR       |
| 20003_1140870422 | Treatment/medication code: folic acid product                                         | MR       |
| 20003_1140870488 | Treatment/medication code: forceval capsule                                           | MR       |
| 20003_1140870504 | Treatment/medication code: hydroxocobalamin product                                   | MR, LDSC |
| 20003_1140870512 | Treatment/medication code: cyanocobalamin product                                     | MR       |
| 20003_1140870570 | Treatment/medication code: vitamin b12 preparation                                    | MR, LDSC |
| 20003_1140870788 | Treatment/medication code: calcium salts                                              | MR, LDSC |
| 20003_1140870856 | Treatment/medication code: calcichew 1.25g chewable tablet                            | MR, LDSC |
| 20003_1140870862 | Treatment/medication code: calcichew forte 2.5g chewable tablet                       | MR       |
| 20003_1140870932 | Treatment/medication code: ascorbic acid product                                      | MR       |
| 20003_1140870954 | Treatment/medication code: vitamin d product                                          | MR       |
| 20003_1140870956 | Treatment/medication code: alfacalcidol                                               | MR, LDSC |
| 20003_1140871024 | Treatment/medication code: vitamin b compound tablet                                  | MR, LDSC |
| 20003_1140871050 | Treatment/medication code: calcichew d3 tablet                                        | MR, LDSC |
| 20003_1140871052 | Treatment/medication code: calcium carbonate+cholecalciferol 1.25g/5micrograms tablet | MR, LDSC |

|                  |                                                            |          |
|------------------|------------------------------------------------------------|----------|
| 20003_1140871112 | Treatment/medication code: vitamin e product               | MR       |
| 20003_1140871138 | Treatment/medication code: vitamin k product               | MR, LDSC |
| 20003_1140871168 | Treatment/medication code: voltarol 25mg e/c tablet        | MR       |
| 20003_1140871180 | Treatment/medication code: rhumalgan 25mg e/c tablet       | MR, LDSC |
| 20003_1140871188 | Treatment/medication code: etodolac                        | MR, LDSC |
| 20003_1140871196 | Treatment/medication code: iodine 200mg tablet             | MR, LDSC |
| 20003_1140871266 | Treatment/medication code: arthrotec tablet                | MR       |
| 20003_1140871310 | Treatment/medication code: ibuprofen                       | MR, LDSC |
| 20003_1140871336 | Treatment/medication code: indomethacin                    | MR       |
| 20003_1140871462 | Treatment/medication code: naproxen                        | MR, LDSC |
| 20003_1140871472 | Treatment/medication code: naprosyn 250mg tablet           | MR       |
| 20003_1140871506 | Treatment/medication code: ketoprofen                      | MR       |
| 20003_1140871542 | Treatment/medication code: mefenamic acid                  | MR       |
| 20003_1140871666 | Treatment/medication code: piroxicam                       | MR, LDSC |
| 20003_1140871680 | Treatment/medication code: tylex capsule                   | MR       |
| 20003_1140871688 | Treatment/medication code: solpadol caplet                 | MR, LDSC |
| 20003_1140871692 | Treatment/medication code: morphine                        | MR, LDSC |
| 20003_1140871732 | Treatment/medication code: buprenorphine                   | MR       |
| 20003_1140871984 | Treatment/medication code: dixarit 25mcg tablet            | MR, LDSC |
| 20003_1140871996 | Treatment/medication code: sanomigran 500micrograms tablet | MR       |
| 20003_1140872036 | Treatment/medication code: paramax tablet                  | MR       |
| 20003_1140872058 | Treatment/medication code: migril tablet                   | MR, LDSC |
| 20003_1140872072 | Treatment/medication code: tegretol 100mg tablet           | MR       |
| 20003_1140872112 | Treatment/medication code: epanutin 25mg capsule           | MR       |
| 20003_1140872150 | Treatment/medication code: clonazepam                      | MR, LDSC |
| 20003_1140872198 | Treatment/medication code: sodium valproate                | MR       |
| 20003_1140872200 | Treatment/medication code: epilim 100mg crushable tablet   | MR, LDSC |
| 20003_1140872228 | Treatment/medication code: gabapentin                      | MR, LDSC |
| 20003_1140872290 | Treatment/medication code: lamotrigine                     | MR       |
| 20003_1140872338 | Treatment/medication code: madopar 62.5 capsule            | MR       |

|                  |                                                    |          |
|------------------|----------------------------------------------------|----------|
| 20003_1140872492 | Treatment/medication code: nicotine product        | MR       |
| 20003_1140872590 | Treatment/medication code: phenoxymethylpenicillin | MR, LDSC |
| 20003_1140872694 | Treatment/medication code: flucloxacillin          | MR, LDSC |
| 20003_1140873394 | Treatment/medication code: doxycycline             | MR, LDSC |
| 20003_1140873450 | Treatment/medication code: tetracycline            | MR       |
| 20003_1140873474 | Treatment/medication code: lymecycline             | MR       |
| 20003_1140873476 | Treatment/medication code: tetralysal 300 capsule  | MR, LDSC |
| 20003_1140873480 | Treatment/medication code: minocycline             | MR, LDSC |
| 20003_1140873548 | Treatment/medication code: oxytetracycline         | MR, LDSC |
| 20003_1140873608 | Treatment/medication code: erythromycin            | MR, LDSC |
| 20003_1140873634 | Treatment/medication code: clarithromycin          | MR, LDSC |
| 20003_1140873642 | Treatment/medication code: azithromycin            | MR       |
| 20003_1140873966 | Treatment/medication code: trimethoprim            | MR, LDSC |
| 20003_1140874014 | Treatment/medication code: metronidazole           | MR, LDSC |
| 20003_1140874126 | Treatment/medication code: nitrofurantoin          | MR, LDSC |
| 20003_1140874138 | Treatment/medication code: ciprofloxacin           | MR       |
| 20003_1140874370 | Treatment/medication code: aciclovir               | MR, LDSC |
| 20003_1140874420 | Treatment/medication code: quinine                 | MR, LDSC |
| 20003_1140874686 | Treatment/medication code: glucophage 500mg tablet | MR, LDSC |
| 20003_1140874718 | Treatment/medication code: glibenclamide           | MR       |
| 20003_1140874744 | Treatment/medication code: gliclazide              | MR, LDSC |
| 20003_1140874790 | Treatment/medication code: betamethasone           | MR       |
| 20003_1140874816 | Treatment/medication code: dexamethasone           | MR       |
| 20003_1140874852 | Treatment/medication code: thyroxine sodium        | MR, LDSC |
| 20003_1140874866 | Treatment/medication code: carbimazole             | MR, LDSC |
| 20003_1140874896 | Treatment/medication code: hydrocortisone          | MR       |
| 20003_1140874930 | Treatment/medication code: prednisolone            | MR, LDSC |
| 20003_1140875336 | Treatment/medication code: nabumetone              | MR       |
| 20003_1140875392 | Treatment/medication code: plaquenil 200mg tablet  | MR       |
| 20003_1140875408 | Treatment/medication code: allopurinol             | MR, LDSC |



|                  |                                                                         |          |
|------------------|-------------------------------------------------------------------------|----------|
| 20003_1140875420 | Treatment/medication code: baclofen                                     | MR       |
| 20003_1140875486 | Treatment/medication code: colchicine                                   | MR, LDSC |
| 20003_1140875630 | Treatment/medication code: movelat cream                                | MR, LDSC |
| 20003_1140875632 | Treatment/medication code: movelat gel                                  | MR       |
| 20003_1140875816 | Treatment/medication code: pilocarpine                                  | MR, LDSC |
| 20003_1140875840 | Treatment/medication code: timolol 0.25% eye drops                      | MR, LDSC |
| 20003_1140875990 | Treatment/medication code: hypromellose                                 | MR, LDSC |
| 20003_1140876006 | Treatment/medication code: polyvinyl alcohol 1% eye drops               | MR, LDSC |
| 20003_1140876076 | Treatment/medication code: flixonase 50micrograms aqueous nasal spray   | MR, LDSC |
| 20003_1140876136 | Treatment/medication code: beconase 50micrograms nasal spray            | MR, LDSC |
| 20003_1140876146 | Treatment/medication code: rhinocort 50micrograms nasal spray           | MR, LDSC |
| 20003_1140876384 | Treatment/medication code: glandosane plain spray                       | MR       |
| 20003_1140876404 | Treatment/medication code: aqueous cream bp                             | MR, LDSC |
| 20003_1140876592 | Treatment/medication code: multivitamin+mineral preparations            | MR, LDSC |
| 20003_1140877630 | Treatment/medication code: calcium+ergocalciferol tablet                | MR, LDSC |
| 20003_1140877826 | Treatment/medication code: sodium bicarbonate                           | MR       |
| 20003_1140877892 | Treatment/medication code: voltarol emulgel                             | MR, LDSC |
| 20003_1140878036 | Treatment/medication code: diclofenac sodium+misoprostol                | MR, LDSC |
| 20003_1140878172 | Treatment/medication code: tears naturale eye drops                     | MR       |
| 20003_1140878184 | Treatment/medication code: sno-tears eye drops                          | MR       |
| 20003_1140878186 | Treatment/medication code: liquifilm tears 1.4% eye drops               | MR, LDSC |
| 20003_1140878190 | Treatment/medication code: minims artificial tears single-use eye drops | MR, LDSC |
| 20003_1140878226 | Treatment/medication code: diprobase cream                              | MR       |
| 20003_1140878248 | Treatment/medication code: oilatum emollient bath additive              | MR       |
| 20003_1140878304 | Treatment/medication code: e45 cream                                    | MR, LDSC |
| 20003_1140878324 | Treatment/medication code: oilatum cream                                | MR, LDSC |
| 20003_1140878378 | Treatment/medication code: dovonex 50micrograms/g ointment              | MR       |
| 20003_1140878498 | Treatment/medication code: polytar liquid                               | MR       |
| 20003_1140878512 | Treatment/medication code: capasal shampoo                              | MR, LDSC |
| 20003_1140878530 | Treatment/medication code: canesten 1% cream                            | MR, LDSC |

|                  |                                             |          |
|------------------|---------------------------------------------|----------|
| 20003_1140879392 | Treatment/medication code: manevac granules | MR       |
| 20003_1140879404 | Treatment/medication code: docusate sodium  | MR       |
| 20003_1140879406 | Treatment/medication code: ranitidine       | MR, LDSC |
| 20003_1140879424 | Treatment/medication code: alverine         | MR       |
| 20003_1140879428 | Treatment/medication code: mebeverine       | MR, LDSC |
| 20003_1140879430 | Treatment/medication code: domperidone      | MR       |
| 20003_1140879464 | Treatment/medication code: loperamide       | MR, LDSC |
| 20003_1140879494 | Treatment/medication code: metoclopramide   | MR, LDSC |
| 20003_1140879540 | Treatment/medication code: fluoxetine       | MR, LDSC |
| 20003_1140879616 | Treatment/medication code: amitriptyline    | MR, LDSC |
| 20003_1140879620 | Treatment/medication code: clomipramine     | MR, LDSC |
| 20003_1140879628 | Treatment/medication code: dothiepin        | MR, LDSC |
| 20003_1140879630 | Treatment/medication code: imipramine       | MR       |
| 20003_1140879634 | Treatment/medication code: trazodone        | MR, LDSC |
| 20003_1140879644 | Treatment/medication code: amantadine       | MR, LDSC |
| 20003_1140879658 | Treatment/medication code: chlorpromazine   | MR       |
| 20003_1140879668 | Treatment/medication code: selegiline       | MR       |
| 20003_1140879760 | Treatment/medication code: bisoprolol       | MR, LDSC |
| 20003_1140879762 | Treatment/medication code: celiprolol       | MR, LDSC |
| 20003_1140879774 | Treatment/medication code: alfuzosin        | MR       |
| 20003_1140879778 | Treatment/medication code: doxazosin        | MR, LDSC |
| 20003_1140879782 | Treatment/medication code: indoramin        | MR, LDSC |
| 20003_1140879792 | Treatment/medication code: terbutaline      | MR       |
| 20003_1140879798 | Treatment/medication code: terazosin        | MR       |
| 20003_1140879802 | Treatment/medication code: amlodipine       | MR, LDSC |
| 20003_1140879806 | Treatment/medication code: diltiazem        | MR       |
| 20003_1140879818 | Treatment/medication code: metoprolol       | MR       |
| 20003_1140879842 | Treatment/medication code: propranolol      | MR, LDSC |
| 20003_1140879854 | Treatment/medication code: sotalol          | MR, LDSC |
| 20003_1140879866 | Treatment/medication code: timolol          | MR       |

|                  |                                                                   |          |
|------------------|-------------------------------------------------------------------|----------|
| 20003_1140880072 | Treatment/medication code: gamolenic acid                         | MR       |
| 20003_1140880086 | Treatment/medication code: calcipotriol                           | MR       |
| 20003_1140880288 | Treatment/medication code: clotrimazole                           | MR       |
| 20003_1140880462 | Treatment/medication code: metrogel 0.75% gel                     | MR       |
| 20003_1140880956 | Treatment/medication code: fentanyl                               | MR, LDSC |
| 20003_1140881320 | Treatment/medication code: magnesium carbonate                    | MR       |
| 20003_1140881414 | Treatment/medication code: gastrocote liquid                      | MR       |
| 20003_1140881446 | Treatment/medication code: proctosedyl ointment                   | MR       |
| 20003_1140881472 | Treatment/medication code: lacri-lube eye ointment                | MR       |
| 20003_1140881474 | Treatment/medication code: normacol granules                      | MR       |
| 20003_1140881702 | Treatment/medication code: adalate 10mg capsule                   | MR, LDSC |
| 20003_1140881856 | Treatment/medication code: salbutamol                             | MR, LDSC |
| 20003_1140881882 | Treatment/medication code: timoptol 0.25% eye drops               | MR       |
| 20003_1140881938 | Treatment/medication code: beclomethasone dipropionate+salbutamol | MR       |
| 20003_1140882082 | Treatment/medication code: promethazine product                   | MR       |
| 20003_1140882112 | Treatment/medication code: co-careldopa                           | MR, LDSC |
| 20003_1140882236 | Treatment/medication code: seroxat 20mg tablet                    | MR       |
| 20003_1140882272 | Treatment/medication code: oramorph 10mg/5ml oral solution        | MR       |
| 20003_1140882374 | Treatment/medication code: co-amoxiclav                           | MR, LDSC |
| 20003_1140882394 | Treatment/medication code: paracetamol + codeine                  | MR, LDSC |
| 20003_1140882498 | Treatment/medication code: penicillin                             | MR, LDSC |
| 20003_1140882618 | Treatment/medication code: diprosalic ointment                    | MR, LDSC |
| 20003_1140882626 | Treatment/medication code: betnesol 0.1% eye/ear/nose drops       | MR       |
| 20003_1140882694 | Treatment/medication code: betnovate cream                        | MR, LDSC |
| 20003_1140882722 | Treatment/medication code: maxidex eye drops                      | MR       |
| 20003_1140882728 | Treatment/medication code: otomize ear spray                      | MR       |
| 20003_1140882756 | Treatment/medication code: timodine cream                         | MR       |
| 20003_1140882776 | Treatment/medication code: fucibet cream                          | MR, LDSC |
| 20003_1140882782 | Treatment/medication code: dermovate cream                        | MR       |
| 20003_1140882800 | Treatment/medication code: eumovate cream                         | MR, LDSC |

|                  |                                                |          |
|------------------|------------------------------------------------|----------|
| 20003_1140882910 | Treatment/medication code: daktacort cream     | MR, LDSC |
| 20003_1140882946 | Treatment/medication code: livial 2.5mg tablet | MR, LDSC |
| 20003_1140883066 | Treatment/medication code: insulin product     | MR, LDSC |
| 20003_1140883468 | Treatment/medication code: clonidine           | MR, LDSC |
| 20003_1140883476 | Treatment/medication code: procyclidine        | MR, LDSC |
| 20003_1140883504 | Treatment/medication code: cetirizine          | MR, LDSC |
| 20003_1140883520 | Treatment/medication code: chlorpheniramine    | MR, LDSC |
| 20003_1140883524 | Treatment/medication code: cinnarizine         | MR, LDSC |
| 20003_1140883548 | Treatment/medication code: ipratropium         | MR, LDSC |
| 20003_1140883568 | Treatment/medication code: oxybutynin          | MR, LDSC |
| 20003_1140883656 | Treatment/medication code: hydroxyzine         | MR       |
| 20003_1140883664 | Treatment/medication code: pizotifen           | MR, LDSC |
| 20003_1140883706 | Treatment/medication code: nedocromil          | MR       |
| 20003_1140883748 | Treatment/medication code: selenium product    | MR, LDSC |
| 20003_1140883968 | Treatment/medication code: carmellose          | MR       |
| 20003_1140884308 | Treatment/medication code: hydroxychloroquine  | MR       |
| 20003_1140884412 | Treatment/medication code: sumatriptan         | MR, LDSC |
| 20003_1140884444 | Treatment/medication code: codeine             | MR, LDSC |
| 20003_1140884464 | Treatment/medication code: dihydrocodeine      | MR, LDSC |
| 20003_1140884488 | Treatment/medication code: diclofenac          | MR, LDSC |
| 20003_1140884512 | Treatment/medication code: liothyronine        | MR, LDSC |
| 20003_1140884516 | Treatment/medication code: thyroxine product   | MR, LDSC |
| 20003_1140884560 | Treatment/medication code: nefopam             | MR       |
| 20003_1140884600 | Treatment/medication code: metformin           | MR, LDSC |
| 20003_1140884622 | Treatment/medication code: oestrogen product   | MR, LDSC |
| 20003_1140884654 | Treatment/medication code: beclomethasone      | MR, LDSC |
| 20003_1140884672 | Treatment/medication code: fludrocortisone     | MR, LDSC |
| 20003_1140884696 | Treatment/medication code: clobetasone         | MR       |
| 20003_1140884700 | Treatment/medication code: trimovate ointment  | MR       |
| 20003_1140888074 | Treatment/medication code: clobetasol          | MR, LDSC |

|                  |                                                             |          |
|------------------|-------------------------------------------------------------|----------|
| 20003_1140888092 | Treatment/medication code: elocon cream                     | MR       |
| 20003_1140888098 | Treatment/medication code: fluticasone                      | MR, LDSC |
| 20003_1140888172 | Treatment/medication code: mometasone                       | MR, LDSC |
| 20003_1140888176 | Treatment/medication code: mometasone furoate 0.1% ointment | MR       |
| 20003_1140888266 | Treatment/medication code: warfarin                         | MR, LDSC |
| 20003_1140888362 | Treatment/medication code: pyridoxine preparation           | MR       |
| 20003_1140888366 | Treatment/medication code: thiamine preparation             | MR, LDSC |
| 20003_1140888386 | Treatment/medication code: iron product                     | MR, LDSC |
| 20003_1140888390 | Treatment/medication code: ferrous salt product             | MR, LDSC |
| 20003_1140888432 | Treatment/medication code: potassium product                | MR       |
| 20003_1140888438 | Treatment/medication code: glucose product                  | MR       |
| 20003_1140888502 | Treatment/medication code: amiodarone                       | MR, LDSC |
| 20003_1140888510 | Treatment/medication code: verapamil                        | MR, LDSC |
| 20003_1140888512 | Treatment/medication code: amiloride                        | MR, LDSC |
| 20003_1140888538 | Treatment/medication code: zinc product                     | MR, LDSC |
| 20003_1140888552 | Treatment/medication code: enalapril                        | MR, LDSC |
| 20003_1140888556 | Treatment/medication code: fosinopril                       | MR, LDSC |
| 20003_1140888560 | Treatment/medication code: perindopril                      | MR, LDSC |
| 20003_1140888570 | Treatment/medication code: flecainide                       | MR, LDSC |
| 20003_1140888578 | Treatment/medication code: antihypertensive                 | MR       |
| 20003_1140888594 | Treatment/medication code: fluvastatin                      | MR       |
| 20003_1140888646 | Treatment/medication code: felodipine                       | MR, LDSC |
| 20003_1140888648 | Treatment/medication code: pravastatin                      | MR       |
| 20003_1140888688 | Treatment/medication code: betahistine                      | MR, LDSC |
| 20003_1140888758 | Treatment/medication code: penicillin v                     | MR       |
| 20003_1140888762 | Treatment/medication code: ismn - isosorbide mononitrate    | MR       |
| 20003_1140909368 | Treatment/medication code: carvedilol                       | MR, LDSC |
| 20003_1140909482 | Treatment/medication code: opticrom allergy eye drops       | MR, LDSC |
| 20003_1140909578 | Treatment/medication code: losec 10mg capsule               | MR       |
| 20003_1140909674 | Treatment/medication code: cod liver oil capsule            | MR, LDSC |

|                  |                                                          |          |
|------------------|----------------------------------------------------------|----------|
| 20003_1140909702 | Treatment/medication code: sulfasalazine                 | MR       |
| 20003_1140909708 | Treatment/medication code: furosemide                    | MR, LDSC |
| 20003_1140909726 | Treatment/medication code: vitamin c product             | MR, LDSC |
| 20003_1140909766 | Treatment/medication code: multivitamins capsule         | MR       |
| 20003_1140909780 | Treatment/medication code: colestyramine                 | MR, LDSC |
| 20003_1140909786 | Treatment/medication code: beclometasone                 | MR, LDSC |
| 20003_1140909788 | Treatment/medication code: sodium cromoglicate           | MR, LDSC |
| 20003_1140909790 | Treatment/medication code: chlorphenamine                | MR, LDSC |
| 20003_1140909806 | Treatment/medication code: dosulepin                     | MR       |
| 20003_1140909872 | Treatment/medication code: vitamin b1 preparation        | MR       |
| 20003_1140909874 | Treatment/medication code: vitamin b6 preparation        | MR, LDSC |
| 20003_1140909936 | Treatment/medication code: indometacin                   | MR, LDSC |
| 20003_1140909954 | Treatment/medication code: acyclovir                     | MR       |
| 20003_1140910494 | Treatment/medication code: b12 - hydroxocobalamin prep   | MR       |
| 20003_1140910498 | Treatment/medication code: flu - influenza vaccine       | MR       |
| 20003_1140910512 | Treatment/medication code: ismo - isosorbide mononitrate | MR, LDSC |
| 20003_1140910548 | Treatment/medication code: iron sulphate                 | MR, LDSC |
| 20003_1140910640 | Treatment/medication code: luteine                       | MR       |
| 20003_1140910698 | Treatment/medication code: oil of peppermint             | MR       |
| 20003_1140910706 | Treatment/medication code: phenobarbital                 | MR, LDSC |
| 20003_1140910766 | Treatment/medication code: nicorandil                    | MR, LDSC |
| 20003_1140910814 | Treatment/medication code: sodium thyroxine              | MR, LDSC |
| 20003_1140910832 | Treatment/medication code: sodium warfarin               | MR       |
| 20003_1140910884 | Treatment/medication code: dovonex scalp solution        | MR       |
| 20003_1140911636 | Treatment/medication code: kalms tablet                  | MR, LDSC |
| 20003_1140911638 | Treatment/medication code: kelp+garlic product           | MR, LDSC |
| 20003_1140911640 | Treatment/medication code: lecithin product              | MR       |
| 20003_1140911642 | Treatment/medication code: tacrolimus                    | MR, LDSC |
| 20003_1140911658 | Treatment/medication code: imigran 50mg tablet           | MR, LDSC |
| 20003_1140911680 | Treatment/medication code: starflower oil                | MR       |

|                  |                                                                   |          |
|------------------|-------------------------------------------------------------------|----------|
| 20003_1140911682 | Treatment/medication code: selenium ace tablet                    | MR       |
| 20003_1140911698 | Treatment/medication code: slozem 120mg m/r capsule               | MR, LDSC |
| 20003_1140911730 | Treatment/medication code: flax oil tablet                        | MR, LDSC |
| 20003_1140911732 | Treatment/medication code: garlic product                         | MR, LDSC |
| 20003_1140911734 | Treatment/medication code: ginkgo forte tablet                    | MR, LDSC |
| 20003_1140911736 | Treatment/medication code: ginseng product                        | MR       |
| 20003_1140911750 | Treatment/medication code: deep relief ibuprofen gel              | MR, LDSC |
| 20003_1140911754 | Treatment/medication code: anadin tablet                          | MR, LDSC |
| 20003_1140912212 | Treatment/medication code: menophase tablet                       | MR       |
| 20003_1140912228 | Treatment/medication code: b12 - cyanocobalamin prep              | MR, LDSC |
| 20003_1140913292 | Treatment/medication code: synalar 1:10 cream                     | MR, LDSC |
| 20003_1140916282 | Treatment/medication code: venlafaxine                            | MR, LDSC |
| 20003_1140916288 | Treatment/medication code: efexor 37.5mg tablet                   | MR       |
| 20003_1140916356 | Treatment/medication code: losartan                               | MR, LDSC |
| 20003_1140916682 | Treatment/medication code: evening primrose oil                   | MR, LDSC |
| 20003_1140916790 | Treatment/medication code: evorel 25 patch                        | MR, LDSC |
| 20003_1140916980 | Treatment/medication code: zantac 75 tablet                       | MR       |
| 20003_1140917034 | Treatment/medication code: airomir 100micrograms cfc-free inhaler | MR       |
| 20003_1140917056 | Treatment/medication code: klioferm tablet                        | MR       |
| 20003_1140917394 | Treatment/medication code: diclomax sr 75mg m/r capsule           | MR, LDSC |
| 20003_1140917428 | Treatment/medication code: angitil sr 90 m/r capsule              | MR, LDSC |
| 20003_1140917450 | Treatment/medication code: oestrogel 1.25g gel                    | MR       |
| 20003_1140921088 | Treatment/medication code: tridestra tablet                       | MR       |
| 20003_1140921600 | Treatment/medication code: citalopram                             | MR, LDSC |
| 20003_1140921814 | Treatment/medication code: mirena 52mg intrauterine system        | MR       |
| 20003_1140921822 | Treatment/medication code: mirena 20mcg/24hrs intrauterine system | MR       |
| 20003_1140921828 | Treatment/medication code: dicloflex 25mg e/c tablet              | MR, LDSC |
| 20003_1140922174 | Treatment/medication code: alendronate sodium                     | MR, LDSC |
| 20003_1140922562 | Treatment/medication code: femoston 1/10 tablet                   | MR, LDSC |
| 20003_1140922714 | Treatment/medication code: dorzolamide                            | MR       |

|                  |                                                                |          |
|------------------|----------------------------------------------------------------|----------|
| 20003_1140922804 | Treatment/medication code: premique 0.625mg/5mg tablet         | MR, LDSC |
| 20003_1140922806 | Treatment/medication code: premique cycle 10mg tablet          | MR       |
| 20003_1140923018 | Treatment/medication code: anastrozole                         | MR, LDSC |
| 20003_1140923022 | Treatment/medication code: arimidex 1mg tablet                 | MR       |
| 20003_1140923276 | Treatment/medication code: co-amilozide                        | MR       |
| 20003_1140923336 | Treatment/medication code: co-tenidone                         | MR, LDSC |
| 20003_1140923346 | Treatment/medication code: co-codamol                          | MR, LDSC |
| 20003_1140923348 | Treatment/medication code: co-proxamol                         | MR, LDSC |
| 20003_1140923350 | Treatment/medication code: co-dydramol                         | MR, LDSC |
| 20003_1140923402 | Treatment/medication code: co-amilofruse                       | MR       |
| 20003_1140923484 | Treatment/medication code: topiramate                          | MR       |
| 20003_1140923572 | Treatment/medication code: adipine mr 10 m/r tablet            | MR, LDSC |
| 20003_1140923670 | Treatment/medication code: gtn - glyceryl trinitrate           | MR       |
| 20003_1140923688 | Treatment/medication code: zoton 15mg capsule                  | MR       |
| 20003_1140923738 | Treatment/medication code: femseven 50 patch                   | MR       |
| 20003_1140923852 | Treatment/medication code: elleste-solo 1mg tablet             | MR, LDSC |
| 20003_1140923920 | Treatment/medication code: volsaid retard 75mg m/r tablet      | MR, LDSC |
| 20003_1140925800 | Treatment/medication code: movicol oral powder                 | MR, LDSC |
| 20003_1140925978 | Treatment/medication code: mycophenolate                       | MR, LDSC |
| 20003_1140926430 | Treatment/medication code: climesse tablet                     | MR       |
| 20003_1140926592 | Treatment/medication code: estraderm mx 25 patch               | MR, LDSC |
| 20003_1140926606 | Treatment/medication code: salbutamol 100micrograms spacehaler | MR, LDSC |
| 20003_1140926732 | Treatment/medication code: meloxicam                           | MR, LDSC |
| 20003_1140926780 | Treatment/medication code: adizem-xl plus m/r capsule          | MR, LDSC |
| 20003_1140926922 | Treatment/medication code: antihistamine 60mg tablet           | MR, LDSC |
| 20003_1140926934 | Treatment/medication code: tamsulosin                          | MR, LDSC |
| 20003_1140926940 | Treatment/medication code: flomax mr 400micrograms m/r capsule | MR       |
| 20003_1140927086 | Treatment/medication code: arthrotec 50 tablet                 | MR, LDSC |
| 20003_1140927320 | Treatment/medication code: dermol 500 lotion                   | MR, LDSC |
| 20003_1140927328 | Treatment/medication code: terbinafine                         | MR, LDSC |



|                  |                                                                                      |          |
|------------------|--------------------------------------------------------------------------------------|----------|
| 20003_1140927730 | Treatment/medication code: epaderm ointment                                          | MR, LDSC |
| 20003_1140928004 | Treatment/medication code: zimovane ls 3.75mg tablet                                 | MR, LDSC |
| 20003_1140928274 | Treatment/medication code: ropinirole                                                | MR       |
| 20003_1140928284 | Treatment/medication code: moxonidine                                                | MR, LDSC |
| 20003_1140928384 | Treatment/medication code: ritonavir                                                 | MR       |
| 20003_1140928878 | Treatment/medication code: zumenon 1mg tablet                                        | MR       |
| 20003_1140928916 | Treatment/medication code: olanzapine                                                | MR       |
| 20003_1140929012 | Treatment/medication code: pantoprazole                                              | MR, LDSC |
| 20003_1141145630 | Treatment/medication code: nitromin 400micrograms cfc-free spray                     | MR, LDSC |
| 20003_1141145638 | Treatment/medication code: nasobec aqueous 50micrograms nasal spray                  | MR, LDSC |
| 20003_1141145660 | Treatment/medication code: valsartan                                                 | MR, LDSC |
| 20003_1141145668 | Treatment/medication code: diovan 40mg capsule                                       | MR, LDSC |
| 20003_1141145812 | Treatment/medication code: minerals - magnesium                                      | MR       |
| 20003_1141145896 | Treatment/medication code: letrozole                                                 | MR, LDSC |
| 20003_1141145900 | Treatment/medication code: femara 2.5mg tablet                                       | MR       |
| 20003_1141146138 | Treatment/medication code: lipitor 10mg tablet                                       | MR, LDSC |
| 20003_1141146188 | Treatment/medication code: latanoprost                                               | MR, LDSC |
| 20003_1141146198 | Treatment/medication code: xalatan 0.005% eye drops                                  | MR, LDSC |
| 20003_1141146234 | Treatment/medication code: atorvastatin                                              | MR, LDSC |
| 20003_1141146378 | Treatment/medication code: natrilix sr 1.5mg m/r tablet                              | MR       |
| 20003_1141146428 | Treatment/medication code: fexofenadine                                              | MR       |
| 20003_1141146508 | Treatment/medication code: nasacort 55micrograms aqueous nasal spray                 | MR       |
| 20003_1141146606 | Treatment/medication code: calcium carbonate+cholecalciferol 1.25g/200iu tablet      | MR, LDSC |
| 20003_1141146612 | Treatment/medication code: calceos chewable tablet                                   | MR       |
| 20003_1141150620 | Treatment/medication code: zolmitriptan                                              | MR, LDSC |
| 20003_1141150624 | Treatment/medication code: zomig 2.5mg tablet                                        | MR, LDSC |
| 20003_1141150750 | Treatment/medication code: brimonidine tartrate                                      | MR, LDSC |
| 20003_1141150754 | Treatment/medication code: alphagan 0.2% eye drops                                   | MR       |
| 20003_1141150944 | Treatment/medication code: nasonex 0.05% aqueous nasal spray                         | MR, LDSC |
| 20003_1141151016 | Treatment/medication code: losartan potassium+hydrochlorothiazide 50mg/12.5mg tablet | MR, LDSC |

|                  |                                                           |          |
|------------------|-----------------------------------------------------------|----------|
| 20003_1141151018 | Treatment/medication code: cozaar-comp 50mg/12.5mg tablet | MR, LDSC |
| 20003_1141151284 | Treatment/medication code: naratriptan                    | MR       |
| 20003_1141151288 | Treatment/medication code: naramig 2.5mg tablet           | MR       |
| 20003_1141151368 | Treatment/medication code: sandrena 0.5mg gel             | MR, LDSC |
| 20003_1141151474 | Treatment/medication code: viazem xl 120mg m/r capsule    | MR, LDSC |
| 20003_1141151718 | Treatment/medication code: evorel conti patch             | MR       |
| 20003_1141151946 | Treatment/medication code: cipramil 10mg tablet           | MR       |
| 20003_1141152590 | Treatment/medication code: glimepiride                    | MR       |
| 20003_1141152732 | Treatment/medication code: mirtazapine                    | MR, LDSC |
| 20003_1141152848 | Treatment/medication code: quetiapine                     | MR, LDSC |
| 20003_1141152998 | Treatment/medication code: irbesartan                     | MR, LDSC |
| 20003_1141153006 | Treatment/medication code: aprovel 75mg tablet            | MR       |
| 20003_1141153026 | Treatment/medication code: lercanidipine                  | MR       |
| 20003_1141153032 | Treatment/medication code: zanidip 10mg tablet            | MR       |
| 20003_1141153236 | Treatment/medication code: oxis 6micrograms turbobhaler   | MR       |
| 20003_1141153242 | Treatment/medication code: balsalazide disodium           | MR       |
| 20003_1141153490 | Treatment/medication code: amisulpride                    | MR       |
| 20003_1141156644 | Treatment/medication code: elleste duet conti tablet      | MR       |
| 20003_1141156836 | Treatment/medication code: candesartan cilexetil          | MR, LDSC |
| 20003_1141156846 | Treatment/medication code: amias 2mg tablet               | MR, LDSC |
| 20003_1141157126 | Treatment/medication code: montelukast product            | MR       |
| 20003_1141157132 | Treatment/medication code: singulair 10mg tablet          | MR, LDSC |
| 20003_1141157178 | Treatment/medication code: senna product                  | MR, LDSC |
| 20003_1141157252 | Treatment/medication code: glyceryl trinitrate product    | MR       |
| 20003_1141157264 | Treatment/medication code: salmeterol product             | MR, LDSC |
| 20003_1141157294 | Treatment/medication code: hydrocortisone product         | MR       |
| 20003_1141157324 | Treatment/medication code: loratadine product             | MR       |
| 20003_1141157364 | Treatment/medication code: metronidazole product          | MR, LDSC |
| 20003_1141157402 | Treatment/medication code: prednisolone product           | MR, LDSC |
| 20003_1141157412 | Treatment/medication code: ibuprofen product              | MR       |

|                  |                                                                       |          |
|------------------|-----------------------------------------------------------------------|----------|
| 20003_1141157418 | Treatment/medication code: budesonide product                         | MR       |
| 20003_1141157458 | Treatment/medication code: hypromellose product                       | MR       |
| 20003_1141157486 | Treatment/medication code: salbutamol product                         | MR       |
| 20003_1141157494 | Treatment/medication code: ispaghula husk product                     | MR       |
| 20003_1141162526 | Treatment/medication code: benadryl allergy relief 8mg capsule        | MR       |
| 20003_1141162544 | Treatment/medication code: lipantil micro 67mg capsule                | MR, LDSC |
| 20003_1141162764 | Treatment/medication code: tolterodine l-tartrate                     | MR, LDSC |
| 20003_1141162824 | Treatment/medication code: detrusitol 1mg tablet                      | MR, LDSC |
| 20003_1141164060 | Treatment/medication code: pramipexole                                | MR       |
| 20003_1141164068 | Treatment/medication code: mirapexin 0.088mg tablet                   | MR, LDSC |
| 20003_1141164086 | Treatment/medication code: salmeterol+fluticasone propionate          | MR, LDSC |
| 20003_1141164276 | Treatment/medication code: nebivolol                                  | MR       |
| 20003_1141164616 | Treatment/medication code: protium 20mg e/c tablet                    | MR       |
| 20003_1141164828 | Treatment/medication code: adcal-d3 1.5g/10micrograms chewable tablet | MR, LDSC |
| 20003_1141164872 | Treatment/medication code: sinemet-62.5 tablet                        | MR       |
| 20003_1141165512 | Treatment/medication code: kapake capsule                             | MR       |
| 20003_1141166006 | Treatment/medication code: telmisartan                                | MR, LDSC |
| 20003_1141166086 | Treatment/medication code: rennie duo oral suspension                 | MR       |
| 20003_1141166200 | Treatment/medication code: implanon 68mg subdermal implant            | MR, LDSC |
| 20003_1141166294 | Treatment/medication code: leflunomide                                | MR, LDSC |
| 20003_1141167206 | Treatment/medication code: oestrogel 0.06% gel                        | MR       |
| 20003_1141167334 | Treatment/medication code: colofac-100 tablet                         | MR       |
| 20003_1141167594 | Treatment/medication code: qvar 50 inhaler                            | MR, LDSC |
| 20003_1141167708 | Treatment/medication code: beclomist 50micrograms nasal spray         | MR       |
| 20003_1141167848 | Treatment/medication code: asasantin retard m/r capsule               | MR       |
| 20003_1141167932 | Treatment/medication code: rizatriptan                                | MR, LDSC |
| 20003_1141167940 | Treatment/medication code: maxalt 5mg tablet                          | MR       |
| 20003_1141168108 | Treatment/medication code: isotard 25xl m/r tablet                    | MR, LDSC |
| 20003_1141168122 | Treatment/medication code: solpadol capsule                           | MR       |
| 20003_1141168318 | Treatment/medication code: clopidogrel                                | MR, LDSC |

|                  |                                                                           |          |
|------------------|---------------------------------------------------------------------------|----------|
| 20003_1141168322 | Treatment/medication code: plavix 75mg tablet                             | MR       |
| 20003_1141168326 | Treatment/medication code: klioavance 1mg/0.5mg tablet                    | MR, LDSC |
| 20003_1141168554 | Treatment/medication code: migravele tablet                               | MR       |
| 20003_1141168574 | Treatment/medication code: raloxifene hydrochloride                       | MR       |
| 20003_1141168578 | Treatment/medication code: evista 60mg tablet                             | MR       |
| 20003_1141168584 | Treatment/medication code: rabeprazole sodium                             | MR, LDSC |
| 20003_1141168590 | Treatment/medication code: pariet 10mg e/c tablet                         | MR, LDSC |
| 20003_1141168648 | Treatment/medication code: solpadeine tablet                              | MR       |
| 20003_1141168650 | Treatment/medication code: solpadeine capsule                             | MR, LDSC |
| 20003_1141168680 | Treatment/medication code: orlistat                                       | MR, LDSC |
| 20003_1141168684 | Treatment/medication code: xenical 120mg capsule                          | MR       |
| 20003_1141168752 | Treatment/medication code: peptac liquid                                  | MR, LDSC |
| 20003_1141168936 | Treatment/medication code: sildenafil                                     | MR, LDSC |
| 20003_1141168944 | Treatment/medication code: viagra 25mg tablet                             | MR       |
| 20003_1141168946 | Treatment/medication code: viagra 50mg tablet                             | MR, LDSC |
| 20003_1141168948 | Treatment/medication code: viagra 100mg tablet                            | MR       |
| 20003_1141169516 | Treatment/medication code: dorzolamide+timolol                            | MR       |
| 20003_1141169520 | Treatment/medication code: cosopt 2%/0.5% eye drops                       | MR, LDSC |
| 20003_1141169844 | Treatment/medication code: dexamethasone+hypromellose 0.1%/0.5% eye drops | MR       |
| 20003_1141171038 | Treatment/medication code: oxycodone hydrochloride                        | MR       |
| 20003_1141171100 | Treatment/medication code: exemestane                                     | MR       |
| 20003_1141171152 | Treatment/medication code: cardicor 1.25mg tablet                         | MR       |
| 20003_1141171336 | Treatment/medication code: eprosartan                                     | MR, LDSC |
| 20003_1141171496 | Treatment/medication code: trospium                                       | MR       |
| 20003_1141171646 | Treatment/medication code: pioglitazone                                   | MR, LDSC |
| 20003_1141171932 | Treatment/medication code: levetiracetam                                  | MR       |
| 20003_1141171940 | Treatment/medication code: keppra 250mg tablet                            | MR       |
| 20003_1141171948 | Treatment/medication code: adcal 600mg chewable tablet                    | MR, LDSC |
| 20003_1141172436 | Treatment/medication code: indivina 1mg/2.5mg tablet                      | MR, LDSC |
| 20003_1141172492 | Treatment/medication code: micardis 20mg tablet                           | MR       |

|                  |                                                                               |          |
|------------------|-------------------------------------------------------------------------------|----------|
| 20003_1141172682 | Treatment/medication code: irbesartan+hydrochlorothiazide 150mg/12.5mg tablet | MR       |
| 20003_1141172686 | Treatment/medication code: coaprovel 150mg/12.5mg tablet                      | MR       |
| 20003_1141172698 | Treatment/medication code: monomax xl 60mg m/r tablet                         | MR, LDSC |
| 20003_1141172728 | Treatment/medication code: almotriptan                                        | MR, LDSC |
| 20003_1141172838 | Treatment/medication code: depakote 250mg e/c tablet                          | MR, LDSC |
| 20003_1141172918 | Treatment/medication code: celluvisc 1% single-use eye drops                  | MR       |
| 20003_1141172924 | Treatment/medication code: desloratadine                                      | MR       |
| 20003_1141172928 | Treatment/medication code: neoclarityn 5mg tablet                             | MR, LDSC |
| 20003_1141173328 | Treatment/medication code: ursodeoxycholic acid                               | MR       |
| 20003_1141173348 | Treatment/medication code: hydroxocobalamin                                   | MR, LDSC |
| 20003_1141174032 | Treatment/medication code: doublebase gel                                     | MR       |
| 20003_1141174424 | Treatment/medication code: solaraze 3% gel                                    | MR       |
| 20003_1141174508 | Treatment/medication code: reductil 10mg capsule                              | MR, LDSC |
| 20003_1141174520 | Treatment/medication code: symbicort 100/6 turbobaler                         | MR, LDSC |
| 20003_1141175684 | Treatment/medication code: risedronate sodium                                 | MR, LDSC |
| 20003_1141175690 | Treatment/medication code: actonel 5mg tablet                                 | MR       |
| 20003_1141176284 | Treatment/medication code: brinzolamide                                       | MR, LDSC |
| 20003_1141176288 | Treatment/medication code: azopt 10mg/ml eye drops                            | MR, LDSC |
| 20003_1141176570 | Treatment/medication code: fosamax 5mg tablet                                 | MR       |
| 20003_1141176662 | Treatment/medication code: celecoxib                                          | MR, LDSC |
| 20003_1141176668 | Treatment/medication code: celebrex 100mg capsule                             | MR       |
| 20003_1141176670 | Treatment/medication code: celebrex 200mg capsule                             | MR       |
| 20003_1141176732 | Treatment/medication code: carbomers                                          | MR, LDSC |
| 20003_1141176832 | Treatment/medication code: seretide 50 evohaler                               | MR, LDSC |
| 20003_1141177526 | Treatment/medication code: esomeprazole                                       | MR, LDSC |
| 20003_1141177532 | Treatment/medication code: nexium 20mg tablet                                 | MR, LDSC |
| 20003_1141177600 | Treatment/medication code: rosiglitazone                                      | MR, LDSC |
| 20003_1141178036 | Treatment/medication code: eltroxin 25micrograms tablet                       | MR       |
| 20003_1141178052 | Treatment/medication code: zapain caplet                                      | MR, LDSC |
| 20003_1141179764 | Treatment/medication code: tenofovir                                          | MR       |

|                  |                                                                                      |          |
|------------------|--------------------------------------------------------------------------------------|----------|
| 20003_1141179824 | Treatment/medication code: yasmin tablet                                             | MR       |
| 20003_1141179830 | Treatment/medication code: piriteze 10mg tablet                                      | MR       |
| 20003_1141179846 | Treatment/medication code: protopic 0.03% ointment                                   | MR, LDSC |
| 20003_1141179914 | Treatment/medication code: bimatoprost                                               | MR, LDSC |
| 20003_1141179920 | Treatment/medication code: lumigan 0.3mg/ml eye drops                                | MR, LDSC |
| 20003_1141179974 | Treatment/medication code: cozaar 25mg tablet                                        | MR, LDSC |
| 20003_1141179992 | Treatment/medication code: dovobet ointment                                          | MR, LDSC |
| 20003_1141180036 | Treatment/medication code: fybogel orange s/f granules                               | MR       |
| 20003_1141180140 | Treatment/medication code: etoricoxib                                                | MR       |
| 20003_1141180148 | Treatment/medication code: arcoxia 60mg tablet                                       | MR, LDSC |
| 20003_1141180150 | Treatment/medication code: arcoxia 90mg tablet                                       | MR, LDSC |
| 20003_1141180212 | Treatment/medication code: escitalopram                                              | MR, LDSC |
| 20003_1141180226 | Treatment/medication code: amoxicillin                                               | MR       |
| 20003_1141180314 | Treatment/medication code: ibandronic acid                                           | MR       |
| 20003_1141180342 | Treatment/medication code: beclometasone dipropionate+salbutamol                     | MR       |
| 20003_1141180392 | Treatment/medication code: cefalexin                                                 | MR       |
| 20003_1141180592 | Treatment/medication code: perindopril+indapamide                                    | MR, LDSC |
| 20003_1141180598 | Treatment/medication code: coversyl plus 4mg/1.25mg tablet                           | MR, LDSC |
| 20003_1141180662 | Treatment/medication code: zirtek allergy 10mg tablet                                | MR       |
| 20003_1141180936 | Treatment/medication code: calcium carbonate+colecalciferol 1.25g/5micrograms tablet | MR       |
| 20003_1141181594 | Treatment/medication code: estriol product                                           | MR       |
| 20003_1141181700 | Treatment/medication code: estradiol product                                         | MR       |
| 20003_1141181868 | Treatment/medication code: omacor 1g capsule                                         | MR, LDSC |
| 20003_1141182628 | Treatment/medication code: tiotropium                                                | MR, LDSC |
| 20003_1141182632 | Treatment/medication code: spiriva 18micrograms inhalation capsule                   | MR, LDSC |
| 20003_1141182800 | Treatment/medication code: cerazette 75micrograms tablet                             | MR, LDSC |
| 20003_1141184726 | Treatment/medication code: xalacom 0.005%/0.5% eye drops                             | MR, LDSC |
| 20003_1141184748 | Treatment/medication code: levocetirizine                                            | MR, LDSC |
| 20003_1141185316 | Treatment/medication code: travoprost                                                | MR, LDSC |
| 20003_1141185326 | Treatment/medication code: travatan 40micrograms/ml eye drops                        | MR, LDSC |

|                  |                                                                                   |          |
|------------------|-----------------------------------------------------------------------------------|----------|
| 20003_1141185986 | Treatment/medication code: cetraben emollient cream                               | MR       |
| 20003_1141187230 | Treatment/medication code: care cetirizine hayfever relief 10mg tablet            | MR       |
| 20003_1141187304 | Treatment/medication code: codipar caplet                                         | MR       |
| 20003_1141187776 | Treatment/medication code: nurofen 200mg tablet                                   | MR, LDSC |
| 20003_1141187810 | Treatment/medication code: tadalafil                                              | MR       |
| 20003_1141187814 | Treatment/medication code: cialis 10mg tablet                                     | MR       |
| 20003_1141187818 | Treatment/medication code: cialis 20mg tablet                                     | MR, LDSC |
| 20003_1141188146 | Treatment/medication code: simvador 10mg tablet                                   | MR, LDSC |
| 20003_1141188210 | Treatment/medication code: berocca effervescent tablet                            | MR, LDSC |
| 20003_1141188442 | Treatment/medication code: glucosamine product                                    | MR, LDSC |
| 20003_1141188594 | Treatment/medication code: humira 40mg injection solution 0.8ml prefilled syringe | MR, LDSC |
| 20003_1141188658 | Treatment/medication code: asacol mr 400mg e/c tablet                             | MR, LDSC |
| 20003_1141188836 | Treatment/medication code: felendil xl 5mg m/r tablet                             | MR       |
| 20003_1141189090 | Treatment/medication code: rosiglitazone 1mg / metformin 500mg tablet             | MR       |
| 20003_1141189094 | Treatment/medication code: avandamet 1mg / 500mg tablet                           | MR       |
| 20003_1141190158 | Treatment/medication code: cipralext 5mg tablet                                   | MR, LDSC |
| 20003_1141190160 | Treatment/medication code: vascalpha 5mg m/r tablet                               | MR       |
| 20003_1141190960 | Treatment/medication code: tramacet 325mg/37.5mg tablet                           | MR       |
| 20003_1141191044 | Treatment/medication code: levothyroxine sodium                                   | MR, LDSC |
| 20003_1141191312 | Treatment/medication code: calfovital d3 powder for oral suspension               | MR       |
| 20003_1141191748 | Treatment/medication code: respiratory mometasone                                 | MR       |
| 20003_1141192000 | Treatment/medication code: dutasteride                                            | MR       |
| 20003_1141192004 | Treatment/medication code: avodart 500micrograms capsule                          | MR       |
| 20003_1141192248 | Treatment/medication code: vardenafil                                             | MR       |
| 20003_1141192410 | Treatment/medication code: rosuvastatin                                           | MR, LDSC |
| 20003_1141192414 | Treatment/medication code: crestor 10mg tablet                                    | MR, LDSC |
| 20003_1141192736 | Treatment/medication code: ezetimibe                                              | MR, LDSC |
| 20003_1141192740 | Treatment/medication code: ezetrol 10mg tablet                                    | MR       |
| 20003_1141192916 | Treatment/medication code: rino clenil 50micrograms nasal spray                   | MR, LDSC |
| 20003_1141193272 | Treatment/medication code: testogel 50mg gel 5g sachet                            | MR, LDSC |

|                  |                                                                                   |          |
|------------------|-----------------------------------------------------------------------------------|----------|
| 20003_1141193282 | Treatment/medication code: olmesartan                                             | MR, LDSC |
| 20003_1141193346 | Treatment/medication code: olmetec 10mg tablet                                    | MR       |
| 20003_1141194224 | Treatment/medication code: allergy relief antihistamine 4mg tablet                | MR       |
| 20003_1141194386 | Treatment/medication code: telfast 30 tablet                                      | MR, LDSC |
| 20003_1141194794 | Treatment/medication code: bendroflumethiazide                                    | MR, LDSC |
| 20003_1141194800 | Treatment/medication code: bendroflumethiazide+potassium 2.5mg/7.7mmol m/r tablet | MR       |
| 20003_1141195044 | Treatment/medication code: hydroxycarbamide                                       | MR       |
| 20003_1141195224 | Treatment/medication code: formoterol                                             | MR       |
| 20003_1141195232 | Treatment/medication code: budesonide+formoterol                                  | MR       |
| 20003_1141199858 | Treatment/medication code: cardioplen xl 5mg m/r tablet                           | MR       |
| 20003_1141200004 | Treatment/medication code: pregabalin                                             | MR, LDSC |
| 20003_1141200072 | Treatment/medication code: lyrica 25mg capsule                                    | MR       |
| 20003_1141200108 | Treatment/medication code: cymalon cranberry 1.5g/5ml liquid                      | MR, LDSC |
| 20003_1141200322 | Treatment/medication code: solifenacin                                            | MR, LDSC |
| 20003_1141200384 | Treatment/medication code: vesicare 5mg tablet                                    | MR       |
| 20003_1141200564 | Treatment/medication code: duloxetine                                             | MR, LDSC |
| 20003_1141200708 | Treatment/medication code: strontium product                                      | MR, LDSC |
| 20003_1141200768 | Treatment/medication code: protelos 2g sachets                                    | MR, LDSC |
| 20003_1141202030 | Treatment/medication code: estradot 25micrograms patch                            | MR, LDSC |
| 20003_1187       | Treatment/medication code: chondroitin product                                    | MR, LDSC |
| 20003_1189       | Treatment/medication code: co-enzyme q10/ubiquinone/bio-quinone/coenzyme q10      | MR, LDSC |
| 20003_1193       | Treatment/medication code: omega-3/fish oil supplement                            | MR, LDSC |
| 20003_1195       | Treatment/medication code: vitamin c product_dup                                  | MR       |
| 20003_1197       | Treatment/medication code: evening primrose oil product                           | MR       |
| 20003_1199       | Treatment/medication code: food supplement/plant/herbal extract                   | MR, LDSC |
| 20003_1201       | Treatment/medication code: st john's wort/hypericum [ctsu]                        | MR, LDSC |
| 20003_1203       | Treatment/medication code: aloe vera product                                      | MR       |
| 20003_1205       | Treatment/medication code: saw palmetto product                                   | MR       |
| 20003_2038459704 | Treatment/medication code: carbamazepine                                          | MR, LDSC |
| 20003_2038459814 | Treatment/medication code: digoxin                                                | MR, LDSC |



|                  |                                                                |          |
|------------------|----------------------------------------------------------------|----------|
| 20003_2038460068 | Treatment/medication code: phenobarbitone                      | MR, LDSC |
| 20003_2038460076 | Treatment/medication code: phenytoin                           | MR, LDSC |
| 20003_2038460150 | Treatment/medication code: paracetamol                         | MR, LDSC |
| 20003_99999      | Treatment/medication code: Free-text entry, unable to be coded | MR, LDSC |
| 20107_1          | Illnesses of father: Heart disease                             | MR, LDSC |
| 20107_10         | Illnesses of father: Alzheimer's disease/dementia              | MR, LDSC |
| 20107_100        | Illnesses of father: None of the above (group 1)               | MR, LDSC |
| 20107_101        | Illnesses of father: None of the above (group 2)               | MR, LDSC |
| 20107_11         | Illnesses of father: Parkinson's disease                       | MR, LDSC |
| 20107_12         | Illnesses of father: Severe depression                         | MR, LDSC |
| 20107_13         | Illnesses of father: Prostate cancer                           | MR, LDSC |
| 20107_2          | Illnesses of father: Stroke                                    | MR, LDSC |
| 20107_3          | Illnesses of father: Lung cancer                               | MR, LDSC |
| 20107_4          | Illnesses of father: Bowel cancer                              | MR, LDSC |
| 20107_6          | Illnesses of father: Chronic bronchitis/emphysema              | MR, LDSC |
| 20107_8          | Illnesses of father: High blood pressure                       | MR, LDSC |
| 20107_9          | Illnesses of father: Diabetes                                  | MR, LDSC |
| 20110_1          | Illnesses of mother: Heart disease                             | MR, LDSC |
| 20110_10         | Illnesses of mother: Alzheimer's disease/dementia              | MR, LDSC |
| 20110_100        | Illnesses of mother: None of the above (group 1)               | MR, LDSC |
| 20110_101        | Illnesses of mother: None of the above (group 2)               | MR, LDSC |
| 20110_11         | Illnesses of mother: Parkinson's disease                       | MR, LDSC |
| 20110_12         | Illnesses of mother: Severe depression                         | MR, LDSC |
| 20110_2          | Illnesses of mother: Stroke                                    | MR, LDSC |
| 20110_3          | Illnesses of mother: Lung cancer                               | MR, LDSC |
| 20110_4          | Illnesses of mother: Bowel cancer                              | MR, LDSC |
| 20110_5          | Illnesses of mother: Breast cancer                             | MR, LDSC |
| 20110_6          | Illnesses of mother: Chronic bronchitis/emphysema              | MR, LDSC |
| 20110_8          | Illnesses of mother: High blood pressure                       | MR, LDSC |
| 20110_9          | Illnesses of mother: Diabetes                                  | MR, LDSC |

|           |                                                                                                           |          |
|-----------|-----------------------------------------------------------------------------------------------------------|----------|
| 20111_1   | Illnesses of siblings: Heart disease                                                                      | MR, LDSC |
| 20111_10  | Illnesses of siblings: Alzheimer's disease/dementia                                                       | MR       |
| 20111_100 | Illnesses of siblings: None of the above (group 1)                                                        | MR, LDSC |
| 20111_101 | Illnesses of siblings: None of the above (group 2)                                                        | MR, LDSC |
| 20111_11  | Illnesses of siblings: Parkinson's disease                                                                | MR, LDSC |
| 20111_12  | Illnesses of siblings: Severe depression                                                                  | MR, LDSC |
| 20111_13  | Illnesses of siblings: Prostate cancer                                                                    | MR, LDSC |
| 20111_2   | Illnesses of siblings: Stroke                                                                             | MR, LDSC |
| 20111_3   | Illnesses of siblings: Lung cancer                                                                        | MR, LDSC |
| 20111_4   | Illnesses of siblings: Bowel cancer                                                                       | MR, LDSC |
| 20111_5   | Illnesses of siblings: Breast cancer                                                                      | MR, LDSC |
| 20111_6   | Illnesses of siblings: Chronic bronchitis/emphysema                                                       | MR, LDSC |
| 20111_8   | Illnesses of siblings: High blood pressure                                                                | MR, LDSC |
| 20111_9   | Illnesses of siblings: Diabetes                                                                           | MR, LDSC |
| 20116_1   | Smoking status: Previous                                                                                  | MR, LDSC |
| 20116_2   | Smoking status: Current                                                                                   | MR, LDSC |
| 20117_0   | Alcohol drinker status: Never                                                                             | MR, LDSC |
| 20117_1   | Alcohol drinker status: Previous                                                                          | MR, LDSC |
| 20118_11  | Home area population density - urban or rural: Scotland - Large Urban Area                                | MR, LDSC |
| 20118_12  | Home area population density - urban or rural: Scotland - Other Urban Area                                | MR, LDSC |
| 20118_13  | Home area population density - urban or rural: Scotland - Accessible Small Town                           | MR       |
| 20118_16  | Home area population density - urban or rural: Scotland - Accessible Rural                                | MR, LDSC |
| 20118_17  | Home area population density - urban or rural: Scotland - Remote Rural                                    | MR, LDSC |
| 20118_3   | Home area population density - urban or rural: England/Wales - Village - sparse                           | MR       |
| 20118_6   | Home area population density - urban or rural: England/Wales - Town and Fringe - less sparse              | MR, LDSC |
| 20118_7   | Home area population density - urban or rural: England/Wales - Village - less sparse                      | MR, LDSC |
| 20118_8   | Home area population density - urban or rural: England/Wales - Hamlet and Isolated Dwelling - less sparse | MR, LDSC |
| 20118_9   | Home area population density - urban or rural: Postcode not linkable                                      | MR       |
| 2247_1    | Hearing difficulty/problems: Yes                                                                          | MR, LDSC |
| 2247_99   | Hearing difficulty/problems: I am completely deaf                                                         | MR       |

|            |                                                                             |          |
|------------|-----------------------------------------------------------------------------|----------|
| 22506_111  | Tobacco smoking: Smokes on most or all days                                 | MR, LDSC |
| 22506_112  | Tobacco smoking: Occasionally                                               | MR, LDSC |
| 22506_113  | Tobacco smoking: Ex-smoker                                                  | MR, LDSC |
| 2395_2     | Hair/balding pattern: Pattern 2                                             | MR, LDSC |
| 2395_3     | Hair/balding pattern: Pattern 3                                             | MR, LDSC |
| 2395_4     | Hair/balding pattern: Pattern 4                                             | MR, LDSC |
| 2664_1     | Reason for reducing amount of alcohol drunk: Illness or ill health          | MR, LDSC |
| 2664_2     | Reason for reducing amount of alcohol drunk: Doctor's advice                | MR, LDSC |
| 2664_3     | Reason for reducing amount of alcohol drunk: Health precaution              | MR, LDSC |
| 2664_4     | Reason for reducing amount of alcohol drunk: Financial reasons              | MR, LDSC |
| 2877_2     | Type of tobacco previously smoked: Hand-rolled cigarettes                   | MR, LDSC |
| 2877_3     | Type of tobacco previously smoked: Cigars or pipes                          | MR, LDSC |
| 3446_2     | Type of tobacco currently smoked: Hand-rolled cigarettes                    | MR, LDSC |
| 3446_3     | Type of tobacco currently smoked: Cigars or pipes                           | MR, LDSC |
| 3859_1     | Reason former drinker stopped drinking alcohol: Illness or ill health       | MR       |
| 3859_2     | Reason former drinker stopped drinking alcohol: Doctor's advice             | MR, LDSC |
| 3859_3     | Reason former drinker stopped drinking alcohol: Health precaution           | MR       |
| 3859_4     | Reason former drinker stopped drinking alcohol: Financial reasons           | MR, LDSC |
| 40001_A419 | Underlying (primary) cause of death: ICD10: A41.9 Septicaemia, unspecified  | MR       |
| 40001_A810 | Underlying (primary) cause of death: ICD10: A81.0 Creutzfeldt-Jakob disease | MR, LDSC |
| 40001_C029 | Underlying (primary) cause of death: ICD10: C02.9 Tongue, unspecified       | MR, LDSC |
| 40001_C109 | Underlying (primary) cause of death: ICD10: C10.9 Oropharynx, unspecified   | MR, LDSC |
| 40001_C140 | Underlying (primary) cause of death: ICD10: C14.0 Pharynx, unspecified      | MR, LDSC |
| 40001_C159 | Underlying (primary) cause of death: ICD10: C15.9 Oesophagus, unspecified   | MR, LDSC |
| 40001_C160 | Underlying (primary) cause of death: ICD10: C16.0 Cardia                    | MR, LDSC |
| 40001_C169 | Underlying (primary) cause of death: ICD10: C16.9 Stomach, unspecified      | MR, LDSC |
| 40001_C170 | Underlying (primary) cause of death: ICD10: C17.0 Duodenum                  | MR       |
| 40001_C180 | Underlying (primary) cause of death: ICD10: C18.0 Caecum                    | MR       |
| 40001_C181 | Underlying (primary) cause of death: ICD10: C18.1 Appendix                  | MR       |
| 40001_C187 | Underlying (primary) cause of death: ICD10: C18.7 Sigmoid colon             | MR       |

|            |                                                                                                   |          |
|------------|---------------------------------------------------------------------------------------------------|----------|
| 40001_C189 | Underlying (primary) cause of death: ICD10: C18.9 Colon, unspecified                              | MR       |
| 40001_C19  | Underlying (primary) cause of death: ICD10: C19 Malignant neoplasm of rectosigmoid junction       | MR       |
| 40001_C20  | Underlying (primary) cause of death: ICD10: C20 Malignant neoplasm of rectum                      | MR       |
| 40001_C210 | Underlying (primary) cause of death: ICD10: C21.0 Anus, unspecified                               | MR       |
| 40001_C220 | Underlying (primary) cause of death: ICD10: C22.0 Liver cell carcinoma                            | MR, LDSC |
| 40001_C221 | Underlying (primary) cause of death: ICD10: C22.1 Intrahepatic bile duct carcinoma                | MR, LDSC |
| 40001_C23  | Underlying (primary) cause of death: ICD10: C23 Malignant neoplasm of gallbladder                 | MR, LDSC |
| 40001_C259 | Underlying (primary) cause of death: ICD10: C25.9 Pancreas, unspecified                           | MR, LDSC |
| 40001_C260 | Underlying (primary) cause of death: ICD10: C26.0 Intestinal tract, part unspecified              | MR, LDSC |
| 40001_C269 | Underlying (primary) cause of death: ICD10: C26.9 Ill-defined sites within the digestive system   | MR       |
| 40001_C329 | Underlying (primary) cause of death: ICD10: C32.9 Larynx, unspecified                             | MR, LDSC |
| 40001_C439 | Underlying (primary) cause of death: ICD10: C43.9 Malignant melanoma of skin, unspecified         | MR       |
| 40001_C450 | Underlying (primary) cause of death: ICD10: C45.0 Mesothelioma of pleura                          | MR, LDSC |
| 40001_C459 | Underlying (primary) cause of death: ICD10: C45.9 Mesothelioma, unspecified                       | MR, LDSC |
| 40001_C482 | Underlying (primary) cause of death: ICD10: C48.2 Peritoneum, unspecified                         | MR       |
| 40001_C499 | Underlying (primary) cause of death: ICD10: C49.9 Connective and soft tissue, unspecified         | MR       |
| 40001_C509 | Underlying (primary) cause of death: ICD10: C50.9 Breast, unspecified                             | MR       |
| 40001_C539 | Underlying (primary) cause of death: ICD10: C53.9 Cervix uteri, unspecified                       | MR, LDSC |
| 40001_C541 | Underlying (primary) cause of death: ICD10: C54.1 Endometrium                                     | MR       |
| 40001_C55  | Underlying (primary) cause of death: ICD10: C55 Malignant neoplasm of uterus, part unspecified    | MR       |
| 40001_C56  | Underlying (primary) cause of death: ICD10: C56 Malignant neoplasm of ovary                       | MR       |
| 40001_C61  | Underlying (primary) cause of death: ICD10: C61 Malignant neoplasm of prostate                    | MR       |
| 40001_C64  | Underlying (primary) cause of death: ICD10: C64 Malignant neoplasm of kidney, except renal pelvis | MR, LDSC |
| 40001_C66  | Underlying (primary) cause of death: ICD10: C66 Malignant neoplasm of ureter                      | MR, LDSC |
| 40001_C679 | Underlying (primary) cause of death: ICD10: C67.9 Bladder, unspecified                            | MR, LDSC |
| 40001_C689 | Underlying (primary) cause of death: ICD10: C68.9 Urinary organ, unspecified                      | MR       |
| 40001_C710 | Underlying (primary) cause of death: ICD10: C71.0 Cerebrum, except lobes and ventricles           | MR, LDSC |
| 40001_C719 | Underlying (primary) cause of death: ICD10: C71.9 Brain, unspecified                              | MR       |
| 40001_C73  | Underlying (primary) cause of death: ICD10: C73 Malignant neoplasm of thyroid gland               | MR, LDSC |

|            |                                                                                                                  |          |
|------------|------------------------------------------------------------------------------------------------------------------|----------|
| 40001_C786 | Underlying (primary) cause of death: ICD10: C78.6 Secondary malignant neoplasm of retroperitoneum and peritoneum | MR, LDSC |
| 40001_C80  | Underlying (primary) cause of death: ICD10: C80 Malignant neoplasm without specification of site                 | MR       |
| 40001_C800 | Underlying (primary) cause of death: ICD10: C80.0 Malignant neoplasm, primary site unknown, so stated            | MR       |
| 40001_C809 | Underlying (primary) cause of death: ICD10: C80.9 Malignant neoplasm, unspecified                                | MR, LDSC |
| 40001_C819 | Underlying (primary) cause of death: ICD10: C81.9 Hodgkin's disease, unspecified                                 | MR       |
| 40001_C829 | Underlying (primary) cause of death: ICD10: C82.9 Follicular non-Hodgkin's lymphoma, unspecified                 | MR       |
| 40001_C833 | Underlying (primary) cause of death: ICD10: C83.3 Large cell (diffuse)                                           | MR, LDSC |
| 40001_C845 | Underlying (primary) cause of death: ICD10: C84.5 Other and unspecified T-cell lymphomas                         | MR       |
| 40001_C851 | Underlying (primary) cause of death: ICD10: C85.1 B-cell lymphoma, unspecified                                   | MR       |
| 40001_C859 | Underlying (primary) cause of death: ICD10: C85.9 Non-Hodgkin's lymphoma, unspecified type                       | MR       |
| 40001_C900 | Underlying (primary) cause of death: ICD10: C90.0 Multiple myeloma                                               | MR, LDSC |
| 40001_C910 | Underlying (primary) cause of death: ICD10: C91.0 Acute lymphoblastic leukaemia                                  | MR, LDSC |
| 40001_C911 | Underlying (primary) cause of death: ICD10: C91.1 Chronic lymphocytic leukaemia                                  | MR, LDSC |
| 40001_C920 | Underlying (primary) cause of death: ICD10: C92.0 Acute myeloid leukaemia                                        | MR, LDSC |
| 40001_C921 | Underlying (primary) cause of death: ICD10: C92.1 Chronic myeloid leukaemia                                      | MR       |
| 40001_C97  | Underlying (primary) cause of death: ICD10: C97 Malignant neoplasms of independent (primary) multiple sites      | MR       |
| 40001_D432 | Underlying (primary) cause of death: ICD10: D43.2 Brain, unspecified                                             | MR       |
| 40001_D469 | Underlying (primary) cause of death: ICD10: D46.9 Myelodysplastic syndrome, unspecified                          | MR       |
| 40001_E149 | Underlying (primary) cause of death: ICD10: E14.9 Without complications                                          | MR       |
| 40001_E854 | Underlying (primary) cause of death: ICD10: E85.4 Organ-limited amyloidosis                                      | MR, LDSC |
| 40001_F019 | Underlying (primary) cause of death: ICD10: F01.9 Vascular dementia, unspecified                                 | MR       |
| 40001_F03  | Underlying (primary) cause of death: ICD10: F03 Unspecified dementia                                             | MR, LDSC |
| 40001_G122 | Underlying (primary) cause of death: ICD10: G12.2 Motor neuron disease                                           | MR       |
| 40001_G20  | Underlying (primary) cause of death: ICD10: G20 Parkinson's disease                                              | MR, LDSC |
| 40001_G309 | Underlying (primary) cause of death: ICD10: G30.9 Alzheimer's disease, unspecified                               | MR       |
| 40001_G318 | Underlying (primary) cause of death: ICD10: G31.8 Other specified degenerative diseases of nervous system        | MR, LDSC |
| 40001_G35  | Underlying (primary) cause of death: ICD10: G35 Multiple sclerosis                                               | MR, LDSC |
| 40001_G409 | Underlying (primary) cause of death: ICD10: G40.9 Epilepsy, unspecified                                          | MR       |
| 40001_G903 | Underlying (primary) cause of death: ICD10: G90.3 Multisystem degeneration                                       | MR, LDSC |

|            |                                                                                                                             |          |
|------------|-----------------------------------------------------------------------------------------------------------------------------|----------|
| 40001_I110 | Underlying (primary) cause of death: ICD10: I11.0 Hypertensive heart disease with (congestive) heart failure                | MR, LDSC |
| 40001_I119 | Underlying (primary) cause of death: ICD10: I11.9 Hypertensive heart disease without (congestive) heart failure             | MR       |
| 40001_I219 | Underlying (primary) cause of death: ICD10: I21.9 Acute myocardial infarction, unspecified                                  | MR       |
| 40001_I251 | Underlying (primary) cause of death: ICD10: I25.1 Atherosclerotic heart disease                                             | MR       |
| 40001_I255 | Underlying (primary) cause of death: ICD10: I25.5 Ischaemic cardiomyopathy                                                  | MR       |
| 40001_I259 | Underlying (primary) cause of death: ICD10: I25.9 Chronic ischaemic heart disease, unspecified                              | MR       |
| 40001_I269 | Underlying (primary) cause of death: ICD10: I26.9 Pulmonary embolism without mention of acute cor pulmonale                 | MR       |
| 40001_I330 | Underlying (primary) cause of death: ICD10: I33.0 Acute and subacute infective endocarditis                                 | MR       |
| 40001_I350 | Underlying (primary) cause of death: ICD10: I35.0 Aortic (valve) stenosis                                                   | MR       |
| 40001_I359 | Underlying (primary) cause of death: ICD10: I35.9 Aortic valve disorder, unspecified                                        | MR       |
| 40001_I38  | Underlying (primary) cause of death: ICD10: I38 Endocarditis, valve unspecified                                             | MR       |
| 40001_I420 | Underlying (primary) cause of death: ICD10: I42.0 Dilated cardiomyopathy                                                    | MR, LDSC |
| 40001_I429 | Underlying (primary) cause of death: ICD10: I42.9 Cardiomyopathy, unspecified                                               | MR, LDSC |
| 40001_I48  | Underlying (primary) cause of death: ICD10: I48 Atrial fibrillation and flutter                                             | MR       |
| 40001_I500 | Underlying (primary) cause of death: ICD10: I50.0 Congestive heart failure                                                  | MR       |
| 40001_I509 | Underlying (primary) cause of death: ICD10: I50.9 Heart failure, unspecified                                                | MR, LDSC |
| 40001_I517 | Underlying (primary) cause of death: ICD10: I51.7 Cardiomegaly                                                              | MR, LDSC |
| 40001_I607 | Underlying (primary) cause of death: ICD10: I60.7 Subarachnoid haemorrhage from intracranial artery, unspecified            | MR       |
| 40001_I609 | Underlying (primary) cause of death: ICD10: I60.9 Subarachnoid haemorrhage, unspecified                                     | MR       |
| 40001_I619 | Underlying (primary) cause of death: ICD10: I61.9 Intracerebral haemorrhage, unspecified                                    | MR, LDSC |
| 40001_I629 | Underlying (primary) cause of death: ICD10: I62.9 Intracranial haemorrhage (nontraumatic), unspecified                      | MR, LDSC |
| 40001_I639 | Underlying (primary) cause of death: ICD10: I63.9 Cerebral infarction, unspecified                                          | MR       |
| 40001_I64  | Underlying (primary) cause of death: ICD10: I64 Stroke, not specified as haemorrhage or infarction                          | MR       |
| 40001_I679 | Underlying (primary) cause of death: ICD10: I67.9 Cerebrovascular disease, unspecified                                      | MR       |
| 40001_I710 | Underlying (primary) cause of death: ICD10: I71.0 Dissection of aorta [any part]                                            | MR, LDSC |
| 40001_I711 | Underlying (primary) cause of death: ICD10: I71.1 Thoracic aortic aneurysm, ruptured                                        | MR       |
| 40001_I713 | Underlying (primary) cause of death: ICD10: I71.3 Abdominal aortic aneurysm, ruptured                                       | MR       |
| 40001_I739 | Underlying (primary) cause of death: ICD10: I73.9 Peripheral vascular disease, unspecified                                  | MR, LDSC |
| 40001_I802 | Underlying (primary) cause of death: ICD10: I80.2 Phlebitis and thrombophlebitis of other deep vessels of lower extremities | MR       |

|            |                                                                                                                                     |          |
|------------|-------------------------------------------------------------------------------------------------------------------------------------|----------|
| 40001_J180 | Underlying (primary) cause of death: ICD10: J18.0 Bronchopneumonia, unspecified                                                     | MR       |
| 40001_J181 | Underlying (primary) cause of death: ICD10: J18.1 Lobar pneumonia, unspecified                                                      | MR, LDSC |
| 40001_J189 | Underlying (primary) cause of death: ICD10: J18.9 Pneumonia, unspecified                                                            | MR       |
| 40001_J439 | Underlying (primary) cause of death: ICD10: J43.9 Emphysema, unspecified                                                            | MR, LDSC |
| 40001_J440 | Underlying (primary) cause of death: ICD10: J44.0 Chronic obstructive pulmonary disease with acute lower respiratory infection      | MR       |
| 40001_J441 | Underlying (primary) cause of death: ICD10: J44.1 Chronic obstructive pulmonary disease with acute exacerbation, unspecified        | MR       |
| 40001_J449 | Underlying (primary) cause of death: ICD10: J44.9 Chronic obstructive pulmonary disease, unspecified                                | MR, LDSC |
| 40001_J459 | Underlying (primary) cause of death: ICD10: J45.9 Asthma, unspecified                                                               | MR, LDSC |
| 40001_J47  | Underlying (primary) cause of death: ICD10: J47 Bronchiectasis                                                                      | MR       |
| 40001_J690 | Underlying (primary) cause of death: ICD10: J69.0 Pneumonitis due to food and vomit                                                 | MR       |
| 40001_J841 | Underlying (primary) cause of death: ICD10: J84.1 Other interstitial pulmonary diseases with fibrosis                               | MR, LDSC |
| 40001_J849 | Underlying (primary) cause of death: ICD10: J84.9 Interstitial pulmonary disease, unspecified                                       | MR       |
| 40001_J988 | Underlying (primary) cause of death: ICD10: J98.8 Other specified respiratory disorders                                             | MR       |
| 40001_K264 | Underlying (primary) cause of death: ICD10: K26.4 Chronic or unspecified with haemorrhage                                           | MR       |
| 40001_K550 | Underlying (primary) cause of death: ICD10: K55.0 Acute vascular disorders of intestine                                             | MR       |
| 40001_K559 | Underlying (primary) cause of death: ICD10: K55.9 Vascular disorder of intestine, unspecified                                       | MR, LDSC |
| 40001_K566 | Underlying (primary) cause of death: ICD10: K56.6 Other and unspecified intestinal obstruction                                      | MR       |
| 40001_K578 | Underlying (primary) cause of death: ICD10: K57.8 Diverticular disease of intestine, part unspecified, with perforation and abscess | MR       |
| 40001_K631 | Underlying (primary) cause of death: ICD10: K63.1 Perforation of intestine (nontraumatic)                                           | MR, LDSC |
| 40001_K701 | Underlying (primary) cause of death: ICD10: K70.1 Alcoholic hepatitis                                                               | MR, LDSC |
| 40001_K703 | Underlying (primary) cause of death: ICD10: K70.3 Alcoholic cirrhosis of liver                                                      | MR, LDSC |
| 40001_K704 | Underlying (primary) cause of death: ICD10: K70.4 Alcoholic hepatic failure                                                         | MR, LDSC |
| 40001_K709 | Underlying (primary) cause of death: ICD10: K70.9 Alcoholic liver disease, unspecified                                              | MR       |
| 40001_K746 | Underlying (primary) cause of death: ICD10: K74.6 Other and unspecified cirrhosis of liver                                          | MR, LDSC |
| 40001_K760 | Underlying (primary) cause of death: ICD10: K76.0 Fatty (change of) liver, not elsewhere classified                                 | MR, LDSC |
| 40001_K802 | Underlying (primary) cause of death: ICD10: K80.2 Calculus of gallbladder without cholecystitis                                     | MR       |
| 40001_K830 | Underlying (primary) cause of death: ICD10: K83.0 Cholangitis                                                                       | MR       |
| 40001_K859 | Underlying (primary) cause of death: ICD10: K85.9 Acute pancreatitis, unspecified                                                   | MR       |

|            |                                                                                                              |          |
|------------|--------------------------------------------------------------------------------------------------------------|----------|
| 40001_K922 | Underlying (primary) cause of death: ICD10: K92.2 Gastro-intestinal haemorrhage, unspecified                 | MR       |
| 40001_M069 | Underlying (primary) cause of death: ICD10: M06.9 Rheumatoid arthritis, unspecified                          | MR, LDSC |
| 40001_N390 | Underlying (primary) cause of death: ICD10: N39.0 Urinary tract infection, site not specified                | MR, LDSC |
| 40001_R99  | Underlying (primary) cause of death: ICD10: R99 Other ill-defined and unspecified causes of mortality        | MR       |
| 40001_U509 | Underlying (primary) cause of death: ICD10: U50.9 Inquest Adjoined Death                                     | MR       |
| 40001_V499 | Underlying (primary) cause of death: ICD10: V49.9 Car occupant [any] injured in unspecified traffic accident | MR       |
| 40001_W100 | Underlying (primary) cause of death: ICD10: W10.0 Home                                                       | MR       |
| 40001_W190 | Underlying (primary) cause of death: ICD10: W19.0 Home                                                       | MR       |
| 40001_X420 | Underlying (primary) cause of death: ICD10: X42.0 Home                                                       | MR, LDSC |
| 40001_X590 | Underlying (primary) cause of death: ICD10: X59.0 Home                                                       | MR       |
| 40001_X599 | Underlying (primary) cause of death: ICD10: X59.9 Unspecified place                                          | MR       |
| 40001_X700 | Underlying (primary) cause of death: ICD10: X70.0 Home                                                       | MR       |
| 40001_X708 | Underlying (primary) cause of death: ICD10: X70.8 Other specified place                                      | MR, LDSC |
| 40001_X780 | Underlying (primary) cause of death: ICD10: X78.0 Home                                                       | MR       |
| 4803_11    | Tinnitus: Yes, now most or all of the time                                                                   | MR, LDSC |
| 4803_12    | Tinnitus: Yes, now a lot of the time                                                                         | MR, LDSC |
| 4803_13    | Tinnitus: Yes, now some of the time                                                                          | MR, LDSC |
| 4803_14    | Tinnitus: Yes, but not now, but have in the past                                                             | MR, LDSC |
| 5441_1     | Which eye(s) are affected by cataract: Right eye                                                             | MR       |
| 5441_2     | Which eye(s) are affected by cataract: Left eye                                                              | MR       |
| 5540_1     | Surgery/amputation of toe or leg: Yes, toes                                                                  | MR, LDSC |
| 5540_2     | Surgery/amputation of toe or leg: Yes, leg below the knee                                                    | MR       |
| 5540_3     | Surgery/amputation of toe or leg: Yes, leg above the knee                                                    | MR       |
| 5610_1     | Which eye(s) affected by presbyopia: Right eye                                                               | MR, LDSC |
| 5610_2     | Which eye(s) affected by presbyopia: Left eye                                                                | MR       |
| 5832_1     | Which eye(s) affected by hypermetropia (long sight): Right eye                                               | MR, LDSC |
| 5832_2     | Which eye(s) affected by hypermetropia (long sight): Left eye                                                | MR       |
| 5843_1     | Which eye(s) affected by myopia (short sight): Right eye                                                     | MR, LDSC |
| 5843_2     | Which eye(s) affected by myopia (short sight): Left eye                                                      | MR       |
| 5855_1     | Which eye(s) affected by astigmatism: Right eye                                                              | MR, LDSC |



|          |                                                                                                                                                  |          |
|----------|--------------------------------------------------------------------------------------------------------------------------------------------------|----------|
| 5855_2   | Which eye(s) affected by astigmatism: Left eye                                                                                                   | MR, LDSC |
| 6138_1   | Qualifications: College or University degree                                                                                                     | MR, LDSC |
| 6138_100 | Qualifications: None of the above                                                                                                                | MR, LDSC |
| 6138_2   | Qualifications: A levels/AS levels or equivalent                                                                                                 | MR, LDSC |
| 6138_3   | Qualifications: O levels/GCSEs or equivalent                                                                                                     | MR, LDSC |
| 6138_4   | Qualifications: CSEs or equivalent                                                                                                               | MR, LDSC |
| 6138_5   | Qualifications: NVQ or HND or HNC or equivalent                                                                                                  | MR, LDSC |
| 6138_6   | Qualifications: Other professional qualifications eg: nursing, teaching                                                                          | MR, LDSC |
| 6142_1   | Current employment status: In paid employment or self-employed                                                                                   | MR, LDSC |
| 6142_100 | Current employment status: None of the above                                                                                                     | MR       |
| 6142_2   | Current employment status: Retired                                                                                                               | MR, LDSC |
| 6142_3   | Current employment status: Looking after home and/or family                                                                                      | MR, LDSC |
| 6142_4   | Current employment status: Unable to work because of sickness or disability                                                                      | MR, LDSC |
| 6142_5   | Current employment status: Unemployed                                                                                                            | MR, LDSC |
| 6142_6   | Current employment status: Doing unpaid or voluntary work                                                                                        | MR, LDSC |
| 6142_7   | Current employment status: Full or part-time student                                                                                             | MR, LDSC |
| 6143_1   | Transport type for commuting to job workplace: Car/motor vehicle                                                                                 | MR, LDSC |
| 6143_100 | Transport type for commuting to job workplace: None of the above                                                                                 | MR       |
| 6143_2   | Transport type for commuting to job workplace: Walk                                                                                              | MR, LDSC |
| 6143_3   | Transport type for commuting to job workplace: Public transport                                                                                  | MR, LDSC |
| 6143_4   | Transport type for commuting to job workplace: Cycle                                                                                             | MR, LDSC |
| 6145_1   | Illness, injury, bereavement, stress in last 2 years: Serious illness, injury or assault to yourself                                             | MR, LDSC |
| 6145_100 | Illness, injury, bereavement, stress in last 2 years: None of the above                                                                          | MR, LDSC |
| 6145_2   | Illness, injury, bereavement, stress in last 2 years: Serious illness, injury or assault of a close relative                                     | MR, LDSC |
| 6145_3   | Illness, injury, bereavement, stress in last 2 years: Death of a close relative                                                                  | MR, LDSC |
| 6145_4   | Illness, injury, bereavement, stress in last 2 years: Death of a spouse or partner                                                               | MR, LDSC |
| 6145_5   | Illness, injury, bereavement, stress in last 2 years: Marital separation/divorce                                                                 | MR, LDSC |
| 6145_6   | Illness, injury, bereavement, stress in last 2 years: Financial difficulties                                                                     | MR, LDSC |
| 6147_1   | Reason for glasses/contact lenses: For short-sightedness, i.e. only or mainly for distance viewing such as driving, cinema etc (called 'myopia') | MR, LDSC |

|          |                                                                                                                                                            |          |
|----------|------------------------------------------------------------------------------------------------------------------------------------------------------------|----------|
| 6147_2   | Reason for glasses/contact lenses: For long-sightedness, i.e. for distance and near, but particularly for near tasks like reading (called 'hypermetropia') | MR, LDSC |
| 6147_3   | Reason for glasses/contact lenses: For just reading/near work as you are getting older (called 'presbyopia')                                               | MR, LDSC |
| 6147_4   | Reason for glasses/contact lenses: For 'astigmatism'                                                                                                       | MR, LDSC |
| 6147_5   | Reason for glasses/contact lenses: For a 'squint' or 'turn' in an eye since childhood (called 'strabismus')                                                | MR, LDSC |
| 6147_6   | Reason for glasses/contact lenses: For a 'lazy' eye or an eye with poor vision since childhood (called 'amblyopia')                                        | MR, LDSC |
| 6147_7   | Reason for glasses/contact lenses: Other eye condition                                                                                                     | MR, LDSC |
| 6148_1   | Eye problems/disorders: Diabetes related eye disease                                                                                                       | MR, LDSC |
| 6148_100 | Eye problems/disorders: None of the above                                                                                                                  | MR, LDSC |
| 6148_2   | Eye problems/disorders: Glaucoma                                                                                                                           | MR, LDSC |
| 6148_3   | Eye problems/disorders: Injury or trauma resulting in loss of vision                                                                                       | MR, LDSC |
| 6148_4   | Eye problems/disorders: Cataract                                                                                                                           | MR, LDSC |
| 6148_5   | Eye problems/disorders: Macular degeneration                                                                                                               | MR, LDSC |
| 6148_6   | Eye problems/disorders: Other serious eye condition                                                                                                        | MR, LDSC |
| 6149_1   | Mouth/teeth dental problems: Mouth ulcers                                                                                                                  | MR, LDSC |
| 6149_100 | Mouth/teeth dental problems: None of the above                                                                                                             | MR, LDSC |
| 6149_2   | Mouth/teeth dental problems: Painful gums                                                                                                                  | MR, LDSC |
| 6149_3   | Mouth/teeth dental problems: Bleeding gums                                                                                                                 | MR, LDSC |
| 6149_4   | Mouth/teeth dental problems: Loose teeth                                                                                                                   | MR, LDSC |
| 6149_5   | Mouth/teeth dental problems: Toothache                                                                                                                     | MR, LDSC |
| 6149_6   | Mouth/teeth dental problems: Dentures                                                                                                                      | MR, LDSC |
| 6150_1   | Vascular/heart problems diagnosed by doctor: Heart attack                                                                                                  | MR, LDSC |
| 6150_100 | Vascular/heart problems diagnosed by doctor: None of the above                                                                                             | MR, LDSC |
| 6150_2   | Vascular/heart problems diagnosed by doctor: Angina                                                                                                        | MR, LDSC |
| 6150_3   | Vascular/heart problems diagnosed by doctor: Stroke                                                                                                        | MR, LDSC |
| 6150_4   | Vascular/heart problems diagnosed by doctor: High blood pressure                                                                                           | MR, LDSC |
| 6151_1   | Fractured bone site(s): Ankle                                                                                                                              | MR, LDSC |
| 6151_2   | Fractured bone site(s): Leg                                                                                                                                | MR, LDSC |
| 6151_3   | Fractured bone site(s): Hip                                                                                                                                | MR, LDSC |
| 6151_4   | Fractured bone site(s): Spine                                                                                                                              | MR, LDSC |

|          |                                                                                                                                      |          |
|----------|--------------------------------------------------------------------------------------------------------------------------------------|----------|
| 6151_5   | Fractured bone site(s): Wrist                                                                                                        | MR, LDSC |
| 6151_6   | Fractured bone site(s): Arm                                                                                                          | MR, LDSC |
| 6151_7   | Fractured bone site(s): Other bones                                                                                                  | MR, LDSC |
| 6152_100 | Blood clot, DVT, bronchitis, emphysema, asthma, rhinitis, eczema, allergy diagnosed by doctor: None of the above                     | MR, LDSC |
| 6152_5   | Blood clot, DVT, bronchitis, emphysema, asthma, rhinitis, eczema, allergy diagnosed by doctor: Blood clot in the leg (DVT)           | MR, LDSC |
| 6152_6   | Blood clot, DVT, bronchitis, emphysema, asthma, rhinitis, eczema, allergy diagnosed by doctor: Emphysema/chronic bronchitis          | MR, LDSC |
| 6152_7   | Blood clot, DVT, bronchitis, emphysema, asthma, rhinitis, eczema, allergy diagnosed by doctor: Blood clot in the lung                | MR, LDSC |
| 6152_8   | Blood clot, DVT, bronchitis, emphysema, asthma, rhinitis, eczema, allergy diagnosed by doctor: Asthma                                | MR, LDSC |
| 6152_9   | Blood clot, DVT, bronchitis, emphysema, asthma, rhinitis, eczema, allergy diagnosed by doctor: Hayfever, allergic rhinitis or eczema | MR, LDSC |
| 6153_1   | Medication for cholesterol, blood pressure, diabetes, or take exogenous hormones: Cholesterol lowering medication                    | MR, LDSC |
| 6153_100 | Medication for cholesterol, blood pressure, diabetes, or take exogenous hormones: None of the above                                  | MR, LDSC |
| 6153_2   | Medication for cholesterol, blood pressure, diabetes, or take exogenous hormones: Blood pressure medication                          | MR, LDSC |
| 6153_3   | Medication for cholesterol, blood pressure, diabetes, or take exogenous hormones: Insulin                                            | MR, LDSC |
| 6153_4   | Medication for cholesterol, blood pressure, diabetes, or take exogenous hormones: Hormone replacement therapy                        | MR, LDSC |
| 6153_5   | Medication for cholesterol, blood pressure, diabetes, or take exogenous hormones: Oral contraceptive pill or minipill                | MR, LDSC |
| 6154_1   | Medication for pain relief, constipation, heartburn: Aspirin                                                                         | MR, LDSC |
| 6154_100 | Medication for pain relief, constipation, heartburn: None of the above                                                               | MR, LDSC |
| 6154_2   | Medication for pain relief, constipation, heartburn: Ibuprofen (e.g. Nurofen)                                                        | MR, LDSC |
| 6154_3   | Medication for pain relief, constipation, heartburn: Paracetamol                                                                     | MR, LDSC |
| 6154_4   | Medication for pain relief, constipation, heartburn: Ranitidine (e.g. Zantac)                                                        | MR, LDSC |
| 6154_5   | Medication for pain relief, constipation, heartburn: Omeprazole (e.g. Zanprol)                                                       | MR, LDSC |
| 6154_6   | Medication for pain relief, constipation, heartburn: Laxatives (e.g. Dulcolax, Senokot)                                              | MR, LDSC |
| 6155_1   | Vitamin and mineral supplements: Vitamin A                                                                                           | MR, LDSC |
| 6155_100 | Vitamin and mineral supplements: None of the above                                                                                   | MR, LDSC |
| 6155_2   | Vitamin and mineral supplements: Vitamin B                                                                                           | MR, LDSC |
| 6155_3   | Vitamin and mineral supplements: Vitamin C                                                                                           | MR, LDSC |
| 6155_4   | Vitamin and mineral supplements: Vitamin D                                                                                           | MR, LDSC |

|          |                                                                        |          |
|----------|------------------------------------------------------------------------|----------|
| 6155_5   | Vitamin and mineral supplements: Vitamin E                             | MR, LDSC |
| 6155_6   | Vitamin and mineral supplements: Folic acid or Folate (Vit B9)         | MR, LDSC |
| 6155_7   | Vitamin and mineral supplements: Multivitamins +/- minerals            | MR, LDSC |
| 6156_100 | Manic/hyper symptoms: None of the above                                | MR, LDSC |
| 6156_11  | Manic/hyper symptoms: I was more active than usual                     | MR, LDSC |
| 6156_12  | Manic/hyper symptoms: I was more talkative than usual                  | MR, LDSC |
| 6156_13  | Manic/hyper symptoms: I needed less sleep than usual                   | MR, LDSC |
| 6156_14  | Manic/hyper symptoms: I was more creative or had more ideas than usual | MR, LDSC |
| 6156_15  | Manic/hyper symptoms: All of the above                                 | MR, LDSC |
| 6157_1   | Why stopped smoking: Illness or ill health                             | MR, LDSC |
| 6157_100 | Why stopped smoking: None of the above                                 | MR, LDSC |
| 6157_2   | Why stopped smoking: Doctor's advice                                   | MR, LDSC |
| 6157_3   | Why stopped smoking: Health precaution                                 | MR, LDSC |
| 6157_4   | Why stopped smoking: Financial reasons                                 | MR, LDSC |
| 6158_1   | Why reduced smoking: Illness or ill health                             | MR, LDSC |
| 6158_100 | Why reduced smoking: None of the above                                 | MR, LDSC |
| 6158_2   | Why reduced smoking: Doctor's advice                                   | MR, LDSC |
| 6158_3   | Why reduced smoking: Health precaution                                 | MR, LDSC |
| 6158_4   | Why reduced smoking: Financial reasons                                 | MR, LDSC |
| 6159_1   | Pain type(s) experienced in last month: Headache                       | MR, LDSC |
| 6159_100 | Pain type(s) experienced in last month: None of the above              | MR, LDSC |
| 6159_2   | Pain type(s) experienced in last month: Facial pain                    | MR, LDSC |
| 6159_3   | Pain type(s) experienced in last month: Neck or shoulder pain          | MR, LDSC |
| 6159_4   | Pain type(s) experienced in last month: Back pain                      | MR, LDSC |
| 6159_5   | Pain type(s) experienced in last month: Stomach or abdominal pain      | MR, LDSC |
| 6159_6   | Pain type(s) experienced in last month: Hip pain                       | MR, LDSC |
| 6159_7   | Pain type(s) experienced in last month: Knee pain                      | MR, LDSC |
| 6159_8   | Pain type(s) experienced in last month: Pain all over the body         | MR, LDSC |
| 6162_1   | Types of transport used (excluding work): Car/motor vehicle            | MR, LDSC |
| 6162_100 | Types of transport used (excluding work): None of the above            | MR, LDSC |

|          |                                                                                                         |          |
|----------|---------------------------------------------------------------------------------------------------------|----------|
| 6162_2   | Types of transport used (excluding work): Walk                                                          | MR, LDSC |
| 6162_3   | Types of transport used (excluding work): Public transport                                              | MR, LDSC |
| 6162_4   | Types of transport used (excluding work): Cycle                                                         | MR, LDSC |
| 6164_1   | Types of physical activity in last 4 weeks: Walking for pleasure (not as a means of transport)          | MR, LDSC |
| 6164_100 | Types of physical activity in last 4 weeks: None of the above                                           | MR, LDSC |
| 6164_2   | Types of physical activity in last 4 weeks: Other exercises (eg: swimming, cycling, keep fit, bowling)  | MR, LDSC |
| 6164_3   | Types of physical activity in last 4 weeks: Strenuous sports                                            | MR, LDSC |
| 6164_4   | Types of physical activity in last 4 weeks: Light DIY (eg: pruning, watering the lawn)                  | MR, LDSC |
| 6164_5   | Types of physical activity in last 4 weeks: Heavy DIY (eg: weeding, lawn mowing, carpentry, digging)    | MR, LDSC |
| 6177_1   | Medication for cholesterol, blood pressure or diabetes: Cholesterol lowering medication                 | MR, LDSC |
| 6177_100 | Medication for cholesterol, blood pressure or diabetes: None of the above                               | MR, LDSC |
| 6177_2   | Medication for cholesterol, blood pressure or diabetes: Blood pressure medication                       | MR, LDSC |
| 6177_3   | Medication for cholesterol, blood pressure or diabetes: Insulin                                         | MR, LDSC |
| 6179_1   | Mineral and other dietary supplements: Fish oil (including cod liver oil)                               | MR, LDSC |
| 6179_100 | Mineral and other dietary supplements: None of the above                                                | MR, LDSC |
| 6179_2   | Mineral and other dietary supplements: Glucosamine                                                      | MR, LDSC |
| 6179_3   | Mineral and other dietary supplements: Calcium                                                          | MR, LDSC |
| 6179_4   | Mineral and other dietary supplements: Zinc                                                             | MR, LDSC |
| 6179_5   | Mineral and other dietary supplements: Iron                                                             | MR, LDSC |
| 6179_6   | Mineral and other dietary supplements: Selenium                                                         | MR, LDSC |
| A04      | Diagnoses - main ICD10: A04 Other bacterial intestinal infections                                       | MR, LDSC |
| A08      | Diagnoses - main ICD10: A08 Viral and other specified intestinal infections                             | MR       |
| A09      | Diagnoses - main ICD10: A09 Diarrhoea and gastro-enteritis of presumed infectious origin                | MR       |
| A41      | Diagnoses - main ICD10: A41 Other septicaemia                                                           | MR       |
| A63      | Diagnoses - main ICD10: A63 Other predominantly sexually transmitted diseases, not elsewhere classified | MR       |
| A87      | Diagnoses - main ICD10: A87 Viral meningitis                                                            | MR, LDSC |
| B02      | Diagnoses - main ICD10: B02 Zoster [herpes zoster]                                                      | MR       |
| B07      | Diagnoses - main ICD10: B07 Viral warts                                                                 | MR       |
| B18      | Diagnoses - main ICD10: B18 Chronic viral hepatitis                                                     | MR       |
| B34      | Diagnoses - main ICD10: B34 Viral infection of unspecified site                                         | MR, LDSC |

|     |                                                                                         |          |
|-----|-----------------------------------------------------------------------------------------|----------|
| B37 | Diagnoses - main ICD10: B37 Candidiasis                                                 | MR       |
| B50 | Diagnoses - main ICD10: B50 Plasmodium falciparum malaria                               | MR       |
| C02 | Diagnoses - main ICD10: C02 Malignant neoplasm of other and unspecified parts of tongue | MR, LDSC |
| C09 | Diagnoses - main ICD10: C09 Malignant neoplasm of tonsil                                | MR, LDSC |
| C15 | Diagnoses - main ICD10: C15 Malignant neoplasm of oesophagus                            | MR, LDSC |
| C16 | Diagnoses - main ICD10: C16 Malignant neoplasm of stomach                               | MR       |
| C18 | Diagnoses - main ICD10: C18 Malignant neoplasm of colon                                 | MR, LDSC |
| C19 | Diagnoses - main ICD10: C19 Malignant neoplasm of rectosigmoid junction                 | MR, LDSC |
| C20 | Diagnoses - main ICD10: C20 Malignant neoplasm of rectum                                | MR, LDSC |
| C21 | Diagnoses - main ICD10: C21 Malignant neoplasm of anus and anal canal                   | MR, LDSC |
| C22 | Diagnoses - main ICD10: C22 Malignant neoplasm of liver and intrahepatic bile ducts     | MR, LDSC |
| C25 | Diagnoses - main ICD10: C25 Malignant neoplasm of pancreas                              | MR, LDSC |
| C32 | Diagnoses - main ICD10: C32 Malignant neoplasm of larynx                                | MR       |
| C34 | Diagnoses - main ICD10: C34 Malignant neoplasm of bronchus and lung                     | MR, LDSC |
| C43 | Diagnoses - main ICD10: C43 Malignant melanoma of skin                                  | MR, LDSC |
| C44 | Diagnoses - main ICD10: C44 Other malignant neoplasms of skin                           | MR, LDSC |
| C45 | Diagnoses - main ICD10: C45 Mesothelioma                                                | MR       |
| C49 | Diagnoses - main ICD10: C49 Malignant neoplasm of other connective and soft tissue      | MR       |
| C50 | Diagnoses - main ICD10: C50 Malignant neoplasm of breast                                | MR, LDSC |
| C53 | Diagnoses - main ICD10: C53 Malignant neoplasm of cervix uteri                          | MR, LDSC |
| C54 | Diagnoses - main ICD10: C54 Malignant neoplasm of corpus uteri                          | MR       |
| C56 | Diagnoses - main ICD10: C56 Malignant neoplasm of ovary                                 | MR       |
| C61 | Diagnoses - main ICD10: C61 Malignant neoplasm of prostate                              | MR, LDSC |
| C62 | Diagnoses - main ICD10: C62 Malignant neoplasm of testis                                | MR, LDSC |
| C64 | Diagnoses - main ICD10: C64 Malignant neoplasm of kidney, except renal pelvis           | MR       |
| C67 | Diagnoses - main ICD10: C67 Malignant neoplasm of bladder                               | MR, LDSC |
| C69 | Diagnoses - main ICD10: C69 Malignant neoplasm of eye and adnexa                        | MR, LDSC |
| C71 | Diagnoses - main ICD10: C71 Malignant neoplasm of brain                                 | MR       |
| C73 | Diagnoses - main ICD10: C73 Malignant neoplasm of thyroid gland                         | MR       |
| C77 | Diagnoses - main ICD10: C77 Secondary and unspecified malignant neoplasm of lymph nodes | MR       |

|     |                                                                                                |          |
|-----|------------------------------------------------------------------------------------------------|----------|
| C78 | Diagnoses - main ICD10: C78 Secondary malignant neoplasm of respiratory and digestive organs   | MR, LDSC |
| C79 | Diagnoses - main ICD10: C79 Secondary malignant neoplasm of other sites                        | MR       |
| C80 | Diagnoses - main ICD10: C80 Malignant neoplasm without specification of site                   | MR, LDSC |
| C81 | Diagnoses - main ICD10: C81 Hodgkin's disease                                                  | MR       |
| C82 | Diagnoses - main ICD10: C82 Follicular [nodular] non-Hodgkin's lymphoma                        | MR, LDSC |
| C83 | Diagnoses - main ICD10: C83 Diffuse non-Hodgkin's lymphoma                                     | MR       |
| C85 | Diagnoses - main ICD10: C85 Other and unspecified types of non-Hodgkin's lymphoma              | MR       |
| C90 | Diagnoses - main ICD10: C90 Multiple myeloma and malignant plasma cell neoplasms               | MR       |
| C91 | Diagnoses - main ICD10: C91 Lymphoid leukaemia                                                 | MR       |
| C92 | Diagnoses - main ICD10: C92 Myeloid leukaemia                                                  | MR, LDSC |
| D03 | Diagnoses - main ICD10: D03 Melanoma in situ                                                   | MR       |
| D04 | Diagnoses - main ICD10: D04 Carcinoma in situ of skin                                          | MR       |
| D05 | Diagnoses - main ICD10: D05 Carcinoma in situ of breast                                        | MR, LDSC |
| D06 | Diagnoses - main ICD10: D06 Carcinoma in situ of cervix uteri                                  | MR       |
| D07 | Diagnoses - main ICD10: D07 Carcinoma in situ of other and unspecified genital organs          | MR       |
| D09 | Diagnoses - main ICD10: D09 Carcinoma in situ of other and unspecified sites                   | MR       |
| D10 | Diagnoses - main ICD10: D10 Benign neoplasm of mouth and pharynx                               | MR       |
| D11 | Diagnoses - main ICD10: D11 Benign neoplasm of major salivary glands                           | MR       |
| D12 | Diagnoses - main ICD10: D12 Benign neoplasm of colon, rectum, anus and anal canal              | MR, LDSC |
| D13 | Diagnoses - main ICD10: D13 Benign neoplasm of other and ill-defined parts of digestive system | MR       |
| D14 | Diagnoses - main ICD10: D14 Benign neoplasm of middle ear and respiratory system               | MR       |
| D16 | Diagnoses - main ICD10: D16 Benign neoplasm of bone and articular cartilage                    | MR, LDSC |
| D17 | Diagnoses - main ICD10: D17 Benign lipomatous neoplasm                                         | MR, LDSC |
| D18 | Diagnoses - main ICD10: D18 Haemangioma and lymphangioma, any site                             | MR, LDSC |
| D21 | Diagnoses - main ICD10: D21 Other benign neoplasms of connective and other soft tissue         | MR, LDSC |
| D22 | Diagnoses - main ICD10: D22 Melanocytic naevi                                                  | MR, LDSC |
| D23 | Diagnoses - main ICD10: D23 Other benign neoplasms of skin                                     | MR, LDSC |
| D24 | Diagnoses - main ICD10: D24 Benign neoplasm of breast                                          | MR, LDSC |
| D25 | Diagnoses - main ICD10: D25 Leiomyoma of uterus                                                | MR, LDSC |
| D26 | Diagnoses - main ICD10: D26 Other benign neoplasms of uterus                                   | MR       |

|     |                                                                                                                               |          |
|-----|-------------------------------------------------------------------------------------------------------------------------------|----------|
| D27 | Diagnoses - main ICD10: D27 Benign neoplasm of ovary                                                                          | MR, LDSC |
| D28 | Diagnoses - main ICD10: D28 Benign neoplasm of other and unspecified female genital organs                                    | MR, LDSC |
| D30 | Diagnoses - main ICD10: D30 Benign neoplasm of urinary organs                                                                 | MR       |
| D32 | Diagnoses - main ICD10: D32 Benign neoplasm of meninges                                                                       | MR       |
| D33 | Diagnoses - main ICD10: D33 Benign neoplasm of brain and other parts of central nervous system                                | MR       |
| D34 | Diagnoses - main ICD10: D34 Benign neoplasm of thyroid gland                                                                  | MR       |
| D35 | Diagnoses - main ICD10: D35 Benign neoplasm of other and unspecified endocrine glands                                         | MR       |
| D36 | Diagnoses - main ICD10: D36 Benign neoplasm of other and unspecified sites                                                    | MR, LDSC |
| D37 | Diagnoses - main ICD10: D37 Neoplasm of uncertain or unknown behaviour of oral cavity and digestive organs                    | MR, LDSC |
| D38 | Diagnoses - main ICD10: D38 Neoplasm of uncertain or unknown behaviour of middle ear and respiratory and intrathoracic organs | MR       |
| D39 | Diagnoses - main ICD10: D39 Neoplasm of uncertain or unknown behaviour of female genital organs                               | MR       |
| D41 | Diagnoses - main ICD10: D41 Neoplasm of uncertain or unknown behaviour of urinary organs                                      | MR       |
| D44 | Diagnoses - main ICD10: D44 Neoplasm of uncertain or unknown behaviour of endocrine glands                                    | MR       |
| D45 | Diagnoses - main ICD10: D45 Polycythaemia vera                                                                                | MR, LDSC |
| D46 | Diagnoses - main ICD10: D46 Myelodysplastic syndromes                                                                         | MR, LDSC |
| D47 | Diagnoses - main ICD10: D47 Other neoplasms of uncertain or unknown behaviour of lymphoid, haematopoietic and related tissue  | MR, LDSC |
| D48 | Diagnoses - main ICD10: D48 Neoplasm of uncertain or unknown behaviour of other and unspecified sites                         | MR, LDSC |
| D50 | Diagnoses - main ICD10: D50 Iron deficiency anaemia                                                                           | MR, LDSC |
| D61 | Diagnoses - main ICD10: D61 Other aplastic anaemias                                                                           | MR       |
| D64 | Diagnoses - main ICD10: D64 Other anaemias                                                                                    | MR, LDSC |
| D68 | Diagnoses - main ICD10: D68 Other coagulation defects                                                                         | MR       |
| D69 | Diagnoses - main ICD10: D69 Purpura and other haemorrhagic conditions                                                         | MR, LDSC |
| D70 | Diagnoses - main ICD10: D70 Agranulocytosis                                                                                   | MR, LDSC |
| D75 | Diagnoses - main ICD10: D75 Other diseases of blood and blood-forming organs                                                  | MR       |
| D86 | Diagnoses - main ICD10: D86 Sarcoidosis                                                                                       | MR, LDSC |
| D89 | Diagnoses - main ICD10: D89 Other disorders involving the immune mechanism, not elsewhere classified                          | MR       |
| E03 | Diagnoses - main ICD10: E03 Other hypothyroidism                                                                              | MR, LDSC |
| E04 | Diagnoses - main ICD10: E04 Other non-toxic goitre                                                                            | MR, LDSC |
| E05 | Diagnoses - main ICD10: E05 Thyrotoxicosis [hyperthyroidism]                                                                  | MR       |



|     |                                                                                           |          |
|-----|-------------------------------------------------------------------------------------------|----------|
| E07 | Diagnoses - main ICD10: E07 Other disorders of thyroid                                    | MR, LDSC |
| E10 | Diagnoses - main ICD10: E10 Insulin-dependent diabetes mellitus                           | MR, LDSC |
| E11 | Diagnoses - main ICD10: E11 Non-insulin-dependent diabetes mellitus                       | MR, LDSC |
| E14 | Diagnoses - main ICD10: E14 Unspecified diabetes mellitus                                 | MR       |
| E16 | Diagnoses - main ICD10: E16 Other disorders of pancreatic internal secretion              | MR, LDSC |
| E21 | Diagnoses - main ICD10: E21 Hyperparathyroidism and other disorders of parathyroid gland  | MR       |
| E22 | Diagnoses - main ICD10: E22 Hyperfunction of pituitary gland                              | MR       |
| E23 | Diagnoses - main ICD10: E23 Hypofunction and other disorders of pituitary gland           | MR, LDSC |
| E27 | Diagnoses - main ICD10: E27 Other disorders of adrenal gland                              | MR       |
| E66 | Diagnoses - main ICD10: E66 Obesity                                                       | MR, LDSC |
| E83 | Diagnoses - main ICD10: E83 Disorders of mineral metabolism                               | MR       |
| E86 | Diagnoses - main ICD10: E86 Volume depletion                                              | MR       |
| E87 | Diagnoses - main ICD10: E87 Other disorders of fluid, electrolyte and acid-base balance   | MR, LDSC |
| F10 | Diagnoses - main ICD10: F10 Mental and behavioural disorders due to use of alcohol        | MR, LDSC |
| F20 | Diagnoses - main ICD10: F20 Schizophrenia                                                 | MR, LDSC |
| F23 | Diagnoses - main ICD10: F23 Acute and transient psychotic disorders                       | MR       |
| F25 | Diagnoses - main ICD10: F25 Schizoaffective disorders                                     | MR       |
| F30 | Diagnoses - main ICD10: F30 Manic episode                                                 | MR, LDSC |
| F31 | Diagnoses - main ICD10: F31 Bipolar affective disorder                                    | MR, LDSC |
| F32 | Diagnoses - main ICD10: F32 Depressive episode                                            | MR, LDSC |
| F33 | Diagnoses - main ICD10: F33 Recurrent depressive disorder                                 | MR, LDSC |
| F41 | Diagnoses - main ICD10: F41 Other anxiety disorders                                       | MR       |
| F43 | Diagnoses - main ICD10: F43 Reaction to severe stress, and adjustment disorders           | MR, LDSC |
| F45 | Diagnoses - main ICD10: F45 Somatoform disorders                                          | MR, LDSC |
| F52 | Diagnoses - main ICD10: F52 Sexual dysfunction, not caused by organic disorder or disease | MR       |
| F60 | Diagnoses - main ICD10: F60 Specific personality disorders                                | MR, LDSC |
| F99 | Diagnoses - main ICD10: F99 Mental disorder, not otherwise specified                      | MR       |
| G20 | Diagnoses - main ICD10: G20 Parkinson's disease                                           | MR       |
| G24 | Diagnoses - main ICD10: G24 Dystonia                                                      | MR, LDSC |
| G35 | Diagnoses - main ICD10: G35 Multiple sclerosis                                            | MR, LDSC |

|     |                                                                                        |          |
|-----|----------------------------------------------------------------------------------------|----------|
| G37 | Diagnoses - main ICD10: G37 Other demyelinating diseases of central nervous system     | MR, LDSC |
| G40 | Diagnoses - main ICD10: G40 Epilepsy                                                   | MR       |
| G43 | Diagnoses - main ICD10: G43 Migraine                                                   | MR, LDSC |
| G44 | Diagnoses - main ICD10: G44 Other headache syndromes                                   | MR, LDSC |
| G45 | Diagnoses - main ICD10: G45 Transient cerebral ischaemic attacks and related syndromes | MR       |
| G47 | Diagnoses - main ICD10: G47 Sleep disorders                                            | MR, LDSC |
| G50 | Diagnoses - main ICD10: G50 Disorders of trigeminal nerve                              | MR, LDSC |
| G51 | Diagnoses - main ICD10: G51 Facial nerve disorders                                     | MR, LDSC |
| G54 | Diagnoses - main ICD10: G54 Nerve root and plexus disorders                            | MR       |
| G56 | Diagnoses - main ICD10: G56 Mononeuropathies of upper limb                             | MR, LDSC |
| G57 | Diagnoses - main ICD10: G57 Mononeuropathies of lower limb                             | MR, LDSC |
| G58 | Diagnoses - main ICD10: G58 Other mononeuropathies                                     | MR, LDSC |
| G61 | Diagnoses - main ICD10: G61 Inflammatory polyneuropathy                                | MR, LDSC |
| G62 | Diagnoses - main ICD10: G62 Other polyneuropathies                                     | MR, LDSC |
| G70 | Diagnoses - main ICD10: G70 Myasthenia gravis and other myoneural disorders            | MR, LDSC |
| G81 | Diagnoses - main ICD10: G81 Hemiplegia                                                 | MR       |
| G82 | Diagnoses - main ICD10: G82 Paraplegia and tetraplegia                                 | MR       |
| G93 | Diagnoses - main ICD10: G93 Other disorders of brain                                   | MR, LDSC |
| G95 | Diagnoses - main ICD10: G95 Other diseases of spinal cord                              | MR       |
| H00 | Diagnoses - main ICD10: H00 Hordeolum and chalazion                                    | MR, LDSC |
| H01 | Diagnoses - main ICD10: H01 Other inflammation of eyelid                               | MR       |
| H02 | Diagnoses - main ICD10: H02 Other disorders of eyelid                                  | MR, LDSC |
| H04 | Diagnoses - main ICD10: H04 Disorders of lachrymal system                              | MR       |
| H05 | Diagnoses - main ICD10: H05 Disorders of orbit                                         | MR       |
| H11 | Diagnoses - main ICD10: H11 Other disorders of conjunctiva                             | MR, LDSC |
| H16 | Diagnoses - main ICD10: H16 Keratitis                                                  | MR       |
| H18 | Diagnoses - main ICD10: H18 Other disorders of cornea                                  | MR       |
| H25 | Diagnoses - main ICD10: H25 Senile cataract                                            | MR, LDSC |
| H26 | Diagnoses - main ICD10: H26 Other cataract                                             | MR, LDSC |
| H27 | Diagnoses - main ICD10: H27 Other disorders of lens                                    | MR       |

|     |                                                                                                  |          |
|-----|--------------------------------------------------------------------------------------------------|----------|
| H33 | Diagnoses - main ICD10: H33 Retinal detachments and breaks                                       | MR, LDSC |
| H34 | Diagnoses - main ICD10: H34 Retinal vascular occlusions                                          | MR, LDSC |
| H35 | Diagnoses - main ICD10: H35 Other retinal disorders                                              | MR       |
| H40 | Diagnoses - main ICD10: H40 Glaucoma                                                             | MR, LDSC |
| H43 | Diagnoses - main ICD10: H43 Disorders of vitreous body                                           | MR, LDSC |
| H49 | Diagnoses - main ICD10: H49 Paralytic strabismus                                                 | MR       |
| H50 | Diagnoses - main ICD10: H50 Other strabismus                                                     | MR       |
| H52 | Diagnoses - main ICD10: H52 Disorders of refraction and accommodation                            | MR       |
| H53 | Diagnoses - main ICD10: H53 Visual disturbances                                                  | MR, LDSC |
| H57 | Diagnoses - main ICD10: H57 Other disorders of eye and adnexa                                    | MR, LDSC |
| H59 | Diagnoses - main ICD10: H59 Postprocedural disorders of eye and adnexa, not elsewhere classified | MR, LDSC |
| H60 | Diagnoses - main ICD10: H60 Otitis externa                                                       | MR, LDSC |
| H61 | Diagnoses - main ICD10: H61 Other disorders of external ear                                      | MR       |
| H65 | Diagnoses - main ICD10: H65 Nonsuppurative otitis media                                          | MR, LDSC |
| H66 | Diagnoses - main ICD10: H66 Suppurative and unspecified otitis media                             | MR       |
| H69 | Diagnoses - main ICD10: H69 Other disorders of Eustachian tube                                   | MR       |
| H71 | Diagnoses - main ICD10: H71 Cholesteatoma of middle ear                                          | MR, LDSC |
| H72 | Diagnoses - main ICD10: H72 Perforation of tympanic membrane                                     | MR, LDSC |
| H73 | Diagnoses - main ICD10: H73 Other disorders of tympanic membrane                                 | MR       |
| H74 | Diagnoses - main ICD10: H74 Other disorders of middle ear and mastoid                            | MR       |
| H80 | Diagnoses - main ICD10: H80 Otosclerosis                                                         | MR, LDSC |
| H81 | Diagnoses - main ICD10: H81 Disorders of vestibular function                                     | MR, LDSC |
| H83 | Diagnoses - main ICD10: H83 Other diseases of inner ear                                          | MR       |
| H90 | Diagnoses - main ICD10: H90 Conductive and sensorineural hearing loss                            | MR       |
| H91 | Diagnoses - main ICD10: H91 Other hearing loss                                                   | MR, LDSC |
| H92 | Diagnoses - main ICD10: H92 Otagia and effusion of ear                                           | MR       |
| H93 | Diagnoses - main ICD10: H93 Other disorders of ear, not elsewhere classified                     | MR       |
| I05 | Diagnoses - main ICD10: I05 Rheumatic mitral valve diseases                                      | MR, LDSC |
| I08 | Diagnoses - main ICD10: I08 Multiple valve diseases                                              | MR       |
| I10 | Diagnoses - main ICD10: I10 Essential (primary) hypertension                                     | MR, LDSC |

|     |                                                                                                                  |          |
|-----|------------------------------------------------------------------------------------------------------------------|----------|
| I12 | Diagnoses - main ICD10: I12 Hypertensive renal disease                                                           | MR, LDSC |
| I20 | Diagnoses - main ICD10: I20 Angina pectoris                                                                      | MR, LDSC |
| I21 | Diagnoses - main ICD10: I21 Acute myocardial infarction                                                          | MR, LDSC |
| I22 | Diagnoses - main ICD10: I22 Subsequent myocardial infarction                                                     | MR, LDSC |
| I24 | Diagnoses - main ICD10: I24 Other acute ischaemic heart diseases                                                 | MR, LDSC |
| I25 | Diagnoses - main ICD10: I25 Chronic ischaemic heart disease                                                      | MR, LDSC |
| I26 | Diagnoses - main ICD10: I26 Pulmonary embolism                                                                   | MR, LDSC |
| I30 | Diagnoses - main ICD10: I30 Acute pericarditis                                                                   | MR, LDSC |
| I31 | Diagnoses - main ICD10: I31 Other diseases of pericardium                                                        | MR, LDSC |
| I33 | Diagnoses - main ICD10: I33 Acute and subacute endocarditis                                                      | MR       |
| I34 | Diagnoses - main ICD10: I34 Nonrheumatic mitral valve disorders                                                  | MR       |
| I35 | Diagnoses - main ICD10: I35 Nonrheumatic aortic valve disorders                                                  | MR       |
| I42 | Diagnoses - main ICD10: I42 Cardiomyopathy                                                                       | MR, LDSC |
| I44 | Diagnoses - main ICD10: I44 Atrioventricular and left bundle-branch block                                        | MR       |
| I45 | Diagnoses - main ICD10: I45 Other conduction disorders                                                           | MR, LDSC |
| I46 | Diagnoses - main ICD10: I46 Cardiac arrest                                                                       | MR       |
| I47 | Diagnoses - main ICD10: I47 Paroxysmal tachycardia                                                               | MR, LDSC |
| I48 | Diagnoses - main ICD10: I48 Atrial fibrillation and flutter                                                      | MR, LDSC |
| I49 | Diagnoses - main ICD10: I49 Other cardiac arrhythmias                                                            | MR, LDSC |
| I50 | Diagnoses - main ICD10: I50 Heart failure                                                                        | MR, LDSC |
| I51 | Diagnoses - main ICD10: I51 Complications and ill-defined descriptions of heart disease                          | MR, LDSC |
| I60 | Diagnoses - main ICD10: I60 Subarachnoid haemorrhage                                                             | MR       |
| I61 | Diagnoses - main ICD10: I61 Intracerebral haemorrhage                                                            | MR       |
| I62 | Diagnoses - main ICD10: I62 Other nontraumatic intracranial haemorrhage                                          | MR, LDSC |
| I63 | Diagnoses - main ICD10: I63 Cerebral infarction                                                                  | MR, LDSC |
| I64 | Diagnoses - main ICD10: I64 Stroke, not specified as haemorrhage or infarction                                   | MR       |
| I65 | Diagnoses - main ICD10: I65 Occlusion and stenosis of precerebral arteries, not resulting in cerebral infarction | MR, LDSC |
| I67 | Diagnoses - main ICD10: I67 Other cerebrovascular diseases                                                       | MR       |
| I70 | Diagnoses - main ICD10: I70 Atherosclerosis                                                                      | MR, LDSC |
| I71 | Diagnoses - main ICD10: I71 Aortic aneurysm and dissection                                                       | MR       |

|     |                                                                                                  |          |
|-----|--------------------------------------------------------------------------------------------------|----------|
| I72 | Diagnoses - main ICD10: I72 Other aneurysm                                                       | MR       |
| I73 | Diagnoses - main ICD10: I73 Other peripheral vascular diseases                                   | MR, LDSC |
| I74 | Diagnoses - main ICD10: I74 Arterial embolism and thrombosis                                     | MR       |
| I77 | Diagnoses - main ICD10: I77 Other disorders of arteries and arterioles                           | MR       |
| I78 | Diagnoses - main ICD10: I78 Diseases of capillaries                                              | MR       |
| I80 | Diagnoses - main ICD10: I80 Phlebitis and thrombophlebitis                                       | MR, LDSC |
| I82 | Diagnoses - main ICD10: I82 Other venous embolism and thrombosis                                 | MR       |
| I83 | Diagnoses - main ICD10: I83 Varicose veins of lower extremities                                  | MR, LDSC |
| I84 | Diagnoses - main ICD10: I84 Haemorrhoids                                                         | MR, LDSC |
| I85 | Diagnoses - main ICD10: I85 Oesophageal varices                                                  | MR       |
| I86 | Diagnoses - main ICD10: I86 Varicose veins of other sites                                        | MR, LDSC |
| I87 | Diagnoses - main ICD10: I87 Other disorders of veins                                             | MR       |
| I89 | Diagnoses - main ICD10: I89 Other non-infective disorders of lymphatic vessels and lymph nodes   | MR       |
| I95 | Diagnoses - main ICD10: I95 Hypotension                                                          | MR, LDSC |
| J01 | Diagnoses - main ICD10: J01 Acute sinusitis                                                      | MR, LDSC |
| J02 | Diagnoses - main ICD10: J02 Acute pharyngitis                                                    | MR, LDSC |
| J03 | Diagnoses - main ICD10: J03 Acute tonsillitis                                                    | MR, LDSC |
| J06 | Diagnoses - main ICD10: J06 Acute upper respiratory infections of multiple and unspecified sites | MR       |
| J13 | Diagnoses - main ICD10: J13 Pneumonia due to Streptococcus pneumoniae                            | MR, LDSC |
| J15 | Diagnoses - main ICD10: J15 Bacterial pneumonia, not elsewhere classified                        | MR       |
| J18 | Diagnoses - main ICD10: J18 Pneumonia, organism unspecified                                      | MR, LDSC |
| J22 | Diagnoses - main ICD10: J22 Unspecified acute lower respiratory infection                        | MR, LDSC |
| J31 | Diagnoses - main ICD10: J31 Chronic rhinitis, nasopharyngitis and pharyngitis                    | MR       |
| J32 | Diagnoses - main ICD10: J32 Chronic sinusitis                                                    | MR       |
| J33 | Diagnoses - main ICD10: J33 Nasal polyp                                                          | MR, LDSC |
| J34 | Diagnoses - main ICD10: J34 Other disorders of nose and nasal sinuses                            | MR, LDSC |
| J35 | Diagnoses - main ICD10: J35 Chronic diseases of tonsils and adenoids                             | MR, LDSC |
| J36 | Diagnoses - main ICD10: J36 Peritonsillar abscess                                                | MR, LDSC |
| J38 | Diagnoses - main ICD10: J38 Diseases of vocal cords and larynx, not elsewhere classified         | MR, LDSC |
| J39 | Diagnoses - main ICD10: J39 Other diseases of upper respiratory tract                            | MR, LDSC |

|     |                                                                                      |          |
|-----|--------------------------------------------------------------------------------------|----------|
| J40 | Diagnoses - main ICD10: J40 Bronchitis, not specified as acute or chronic            | MR       |
| J43 | Diagnoses - main ICD10: J43 Emphysema                                                | MR, LDSC |
| J44 | Diagnoses - main ICD10: J44 Other chronic obstructive pulmonary disease              | MR, LDSC |
| J45 | Diagnoses - main ICD10: J45 Asthma                                                   | MR, LDSC |
| J46 | Diagnoses - main ICD10: J46 Status asthmaticus                                       | MR, LDSC |
| J47 | Diagnoses - main ICD10: J47 Bronchiectasis                                           | MR, LDSC |
| J84 | Diagnoses - main ICD10: J84 Other interstitial pulmonary diseases                    | MR, LDSC |
| J86 | Diagnoses - main ICD10: J86 Pyothorax                                                | MR, LDSC |
| J90 | Diagnoses - main ICD10: J90 Pleural effusion, not elsewhere classified               | MR, LDSC |
| J93 | Diagnoses - main ICD10: J93 Pneumothorax                                             | MR       |
| J96 | Diagnoses - main ICD10: J96 Respiratory failure, not elsewhere classified            | MR       |
| J98 | Diagnoses - main ICD10: J98 Other respiratory disorders                              | MR       |
| K00 | Diagnoses - main ICD10: K00 Disorders of tooth development and eruption              | MR, LDSC |
| K01 | Diagnoses - main ICD10: K01 Embedded and impacted teeth                              | MR, LDSC |
| K02 | Diagnoses - main ICD10: K02 Dental caries                                            | MR, LDSC |
| K04 | Diagnoses - main ICD10: K04 Diseases of pulp and periapical tissues                  | MR       |
| K05 | Diagnoses - main ICD10: K05 Gingivitis and periodontal diseases                      | MR, LDSC |
| K06 | Diagnoses - main ICD10: K06 Other disorders of gingiva and edentulous alveolar ridge | MR       |
| K07 | Diagnoses - main ICD10: K07 Dentofacial anomalies [including malocclusion]           | MR       |
| K08 | Diagnoses - main ICD10: K08 Other disorders of teeth and supporting structures       | MR, LDSC |
| K09 | Diagnoses - main ICD10: K09 Cysts of oral region, not elsewhere classified           | MR, LDSC |
| K10 | Diagnoses - main ICD10: K10 Other diseases of jaws                                   | MR       |
| K11 | Diagnoses - main ICD10: K11 Diseases of salivary glands                              | MR       |
| K12 | Diagnoses - main ICD10: K12 Stomatitis and related lesions                           | MR       |
| K13 | Diagnoses - main ICD10: K13 Other diseases of lip and oral mucosa                    | MR, LDSC |
| K14 | Diagnoses - main ICD10: K14 Diseases of tongue                                       | MR, LDSC |
| K20 | Diagnoses - main ICD10: K20 Oesophagitis                                             | MR, LDSC |
| K21 | Diagnoses - main ICD10: K21 Gastro-oesophageal reflux disease                        | MR, LDSC |
| K22 | Diagnoses - main ICD10: K22 Other diseases of oesophagus                             | MR, LDSC |
| K25 | Diagnoses - main ICD10: K25 Gastric ulcer                                            | MR, LDSC |

|     |                                                                                       |          |
|-----|---------------------------------------------------------------------------------------|----------|
| K26 | Diagnoses - main ICD10: K26 Duodenal ulcer                                            | MR       |
| K27 | Diagnoses - main ICD10: K27 Peptic ulcer, site unspecified                            | MR       |
| K29 | Diagnoses - main ICD10: K29 Gastritis and duodenitis                                  | MR, LDSC |
| K30 | Diagnoses - main ICD10: K30 Dyspepsia                                                 | MR, LDSC |
| K31 | Diagnoses - main ICD10: K31 Other diseases of stomach and duodenum                    | MR       |
| K35 | Diagnoses - main ICD10: K35 Acute appendicitis                                        | MR, LDSC |
| K37 | Diagnoses - main ICD10: K37 Unspecified appendicitis                                  | MR       |
| K40 | Diagnoses - main ICD10: K40 Inguinal hernia                                           | MR, LDSC |
| K41 | Diagnoses - main ICD10: K41 Femoral hernia                                            | MR, LDSC |
| K42 | Diagnoses - main ICD10: K42 Umbilical hernia                                          | MR, LDSC |
| K43 | Diagnoses - main ICD10: K43 Ventral hernia                                            | MR, LDSC |
| K44 | Diagnoses - main ICD10: K44 Diaphragmatic hernia                                      | MR, LDSC |
| K46 | Diagnoses - main ICD10: K46 Unspecified abdominal hernia                              | MR       |
| K50 | Diagnoses - main ICD10: K50 Crohn's disease [regional enteritis]                      | MR, LDSC |
| K51 | Diagnoses - main ICD10: K51 Ulcerative colitis                                        | MR, LDSC |
| K52 | Diagnoses - main ICD10: K52 Other non-infective gastro-enteritis and colitis          | MR, LDSC |
| K55 | Diagnoses - main ICD10: K55 Vascular disorders of intestine                           | MR       |
| K56 | Diagnoses - main ICD10: K56 Paralytic ileus and intestinal obstruction without hernia | MR       |
| K57 | Diagnoses - main ICD10: K57 Diverticular disease of intestine                         | MR, LDSC |
| K58 | Diagnoses - main ICD10: K58 Irritable bowel syndrome                                  | MR, LDSC |
| K59 | Diagnoses - main ICD10: K59 Other functional intestinal disorders                     | MR, LDSC |
| K60 | Diagnoses - main ICD10: K60 Fissure and fistula of anal and rectal regions            | MR, LDSC |
| K61 | Diagnoses - main ICD10: K61 Abscess of anal and rectal regions                        | MR, LDSC |
| K62 | Diagnoses - main ICD10: K62 Other diseases of anus and rectum                         | MR, LDSC |
| K63 | Diagnoses - main ICD10: K63 Other diseases of intestine                               | MR, LDSC |
| K65 | Diagnoses - main ICD10: K65 Peritonitis                                               | MR, LDSC |
| K66 | Diagnoses - main ICD10: K66 Other disorders of peritoneum                             | MR       |
| K70 | Diagnoses - main ICD10: K70 Alcoholic liver disease                                   | MR       |
| K74 | Diagnoses - main ICD10: K74 Fibrosis and cirrhosis of liver                           | MR       |
| K75 | Diagnoses - main ICD10: K75 Other inflammatory liver diseases                         | MR       |

|     |                                                                                                    |          |
|-----|----------------------------------------------------------------------------------------------------|----------|
| K76 | Diagnoses - main ICD10: K76 Other diseases of liver                                                | MR, LDSC |
| K80 | Diagnoses - main ICD10: K80 Cholelithiasis                                                         | MR, LDSC |
| K81 | Diagnoses - main ICD10: K81 Cholecystitis                                                          | MR, LDSC |
| K82 | Diagnoses - main ICD10: K82 Other diseases of gallbladder                                          | MR       |
| K83 | Diagnoses - main ICD10: K83 Other diseases of biliary tract                                        | MR       |
| K85 | Diagnoses - main ICD10: K85 Acute pancreatitis                                                     | MR, LDSC |
| K86 | Diagnoses - main ICD10: K86 Other diseases of pancreas                                             | MR, LDSC |
| K90 | Diagnoses - main ICD10: K90 Intestinal malabsorption                                               | MR, LDSC |
| K91 | Diagnoses - main ICD10: K91 Postprocedural disorders of digestive system, not elsewhere classified | MR, LDSC |
| K92 | Diagnoses - main ICD10: K92 Other diseases of digestive system                                     | MR, LDSC |
| L02 | Diagnoses - main ICD10: L02 Cutaneous abscess, furuncle and carbuncle                              | MR       |
| L03 | Diagnoses - main ICD10: L03 Cellulitis                                                             | MR, LDSC |
| L05 | Diagnoses - main ICD10: L05 Pilonidal cyst                                                         | MR, LDSC |
| L08 | Diagnoses - main ICD10: L08 Other local infections of skin and subcutaneous tissue                 | MR, LDSC |
| L27 | Diagnoses - main ICD10: L27 Dermatitis due to substances taken internally                          | MR, LDSC |
| L28 | Diagnoses - main ICD10: L28 Lichen simplex chronicus and prurigo                                   | MR       |
| L29 | Diagnoses - main ICD10: L29 Pruritus                                                               | MR       |
| L30 | Diagnoses - main ICD10: L30 Other dermatitis                                                       | MR, LDSC |
| L40 | Diagnoses - main ICD10: L40 Psoriasis                                                              | MR, LDSC |
| L43 | Diagnoses - main ICD10: L43 Lichen planus                                                          | MR, LDSC |
| L50 | Diagnoses - main ICD10: L50 Urticaria                                                              | MR, LDSC |
| L53 | Diagnoses - main ICD10: L53 Other erythematous conditions                                          | MR       |
| L57 | Diagnoses - main ICD10: L57 Skin changes due to chronic exposure to nonionising radiation          | MR, LDSC |
| L60 | Diagnoses - main ICD10: L60 Nail disorders                                                         | MR, LDSC |
| L72 | Diagnoses - main ICD10: L72 Follicular cysts of skin and subcutaneous tissue                       | MR, LDSC |
| L73 | Diagnoses - main ICD10: L73 Other follicular disorders                                             | MR, LDSC |
| L81 | Diagnoses - main ICD10: L81 Other disorders of pigmentation                                        | MR       |
| L82 | Diagnoses - main ICD10: L82 Seborrhoeic keratosis                                                  | MR, LDSC |
| L85 | Diagnoses - main ICD10: L85 Other epidermal thickening                                             | MR, LDSC |
| L90 | Diagnoses - main ICD10: L90 Atrophic disorders of skin                                             | MR, LDSC |



|     |                                                                                                       |          |
|-----|-------------------------------------------------------------------------------------------------------|----------|
| L91 | Diagnoses - main ICD10: L91 Hypertrophic disorders of skin                                            | MR, LDSC |
| L92 | Diagnoses - main ICD10: L92 Granulomatous disorders of skin and subcutaneous tissue                   | MR       |
| L97 | Diagnoses - main ICD10: L97 Ulcer of lower limb, not elsewhere classified                             | MR       |
| L98 | Diagnoses - main ICD10: L98 Other disorders of skin and subcutaneous tissue, not elsewhere classified | MR, LDSC |
| M00 | Diagnoses - main ICD10: M00 Pyogenic arthritis                                                        | MR       |
| M05 | Diagnoses - main ICD10: M05 Seropositive rheumatoid arthritis                                         | MR, LDSC |
| M06 | Diagnoses - main ICD10: M06 Other rheumatoid arthritis                                                | MR, LDSC |
| M10 | Diagnoses - main ICD10: M10 Gout                                                                      | MR, LDSC |
| M13 | Diagnoses - main ICD10: M13 Other arthritis                                                           | MR, LDSC |
| M15 | Diagnoses - main ICD10: M15 Polyarthrosis                                                             | MR, LDSC |
| M16 | Diagnoses - main ICD10: M16 Coxarthrosis [arthrosis of hip]                                           | MR, LDSC |
| M17 | Diagnoses - main ICD10: M17 Gonarthrosis [arthrosis of knee]                                          | MR, LDSC |
| M18 | Diagnoses - main ICD10: M18 Arthrosis of first carpometacarpal joint                                  | MR, LDSC |
| M19 | Diagnoses - main ICD10: M19 Other arthrosis                                                           | MR, LDSC |
| M20 | Diagnoses - main ICD10: M20 Acquired deformities of fingers and toes                                  | MR, LDSC |
| M21 | Diagnoses - main ICD10: M21 Other acquired deformities of limbs                                       | MR       |
| M22 | Diagnoses - main ICD10: M22 Disorders of patella                                                      | MR       |
| M23 | Diagnoses - main ICD10: M23 Internal derangement of knee                                              | MR, LDSC |
| M24 | Diagnoses - main ICD10: M24 Other specific joint derangements                                         | MR, LDSC |
| M25 | Diagnoses - main ICD10: M25 Other joint disorders, not elsewhere classified                           | MR, LDSC |
| M31 | Diagnoses - main ICD10: M31 Other necrotising vasculopathies                                          | MR       |
| M32 | Diagnoses - main ICD10: M32 Systemic lupus erythematosus                                              | MR       |
| M34 | Diagnoses - main ICD10: M34 Systemic sclerosis                                                        | MR       |
| M35 | Diagnoses - main ICD10: M35 Other systemic involvement of connective tissue                           | MR       |
| M41 | Diagnoses - main ICD10: M41 Scoliosis                                                                 | MR       |
| M43 | Diagnoses - main ICD10: M43 Other deforming dorsopathies                                              | MR       |
| M45 | Diagnoses - main ICD10: M45 Ankylosing spondylitis                                                    | MR, LDSC |
| M46 | Diagnoses - main ICD10: M46 Other inflammatory spondylopathies                                        | MR, LDSC |
| M47 | Diagnoses - main ICD10: M47 Spondylosis                                                               | MR, LDSC |
| M48 | Diagnoses - main ICD10: M48 Other spondylopathies                                                     | MR, LDSC |

|     |                                                                                                        |          |
|-----|--------------------------------------------------------------------------------------------------------|----------|
| M50 | Diagnoses - main ICD10: M50 Cervical disk disorders                                                    | MR, LDSC |
| M51 | Diagnoses - main ICD10: M51 Other intervertebral disk disorders                                        | MR, LDSC |
| M53 | Diagnoses - main ICD10: M53 Other dorsopathies, not elsewhere classified                               | MR, LDSC |
| M54 | Diagnoses - main ICD10: M54 Dorsalgia                                                                  | MR, LDSC |
| M60 | Diagnoses - main ICD10: M60 Myositis                                                                   | MR, LDSC |
| M62 | Diagnoses - main ICD10: M62 Other disorders of muscle                                                  | MR, LDSC |
| M65 | Diagnoses - main ICD10: M65 Synovitis and tenosynovitis                                                | MR, LDSC |
| M66 | Diagnoses - main ICD10: M66 Spontaneous rupture of synovium and tendon                                 | MR       |
| M67 | Diagnoses - main ICD10: M67 Other disorders of synovium and tendon                                     | MR, LDSC |
| M70 | Diagnoses - main ICD10: M70 Soft tissue disorders related to use, overuse and pressure                 | MR, LDSC |
| M71 | Diagnoses - main ICD10: M71 Other bursopathies                                                         | MR       |
| M72 | Diagnoses - main ICD10: M72 Fibroblastic disorders                                                     | MR, LDSC |
| M75 | Diagnoses - main ICD10: M75 Shoulder lesions                                                           | MR, LDSC |
| M76 | Diagnoses - main ICD10: M76 Enthesopathies of lower limb, excluding foot                               | MR       |
| M77 | Diagnoses - main ICD10: M77 Other enthesopathies                                                       | MR, LDSC |
| M79 | Diagnoses - main ICD10: M79 Other soft tissue disorders, not elsewhere classified                      | MR, LDSC |
| M80 | Diagnoses - main ICD10: M80 Osteoporosis with pathological fracture                                    | MR, LDSC |
| M81 | Diagnoses - main ICD10: M81 Osteoporosis without pathological fracture                                 | MR       |
| M84 | Diagnoses - main ICD10: M84 Disorders of continuity of bone                                            | MR, LDSC |
| M85 | Diagnoses - main ICD10: M85 Other disorders of bone density and structure                              | MR       |
| M86 | Diagnoses - main ICD10: M86 Osteomyelitis                                                              | MR       |
| M87 | Diagnoses - main ICD10: M87 Osteonecrosis                                                              | MR       |
| M89 | Diagnoses - main ICD10: M89 Other disorders of bone                                                    | MR       |
| M94 | Diagnoses - main ICD10: M94 Other disorders of cartilage                                               | MR       |
| M95 | Diagnoses - main ICD10: M95 Other acquired deformities of musculoskeletal system and connective tissue | MR, LDSC |
| M96 | Diagnoses - main ICD10: M96 Postprocedural musculoskeletal disorders, not elsewhere classified         | MR       |
| N02 | Diagnoses - main ICD10: N02 Recurrent and persistent haematuria                                        | MR       |
| N05 | Diagnoses - main ICD10: N05 Unspecified nephritic syndrome                                             | MR, LDSC |
| N10 | Diagnoses - main ICD10: N10 Acute tubulo-interstitial nephritis                                        | MR       |
| N12 | Diagnoses - main ICD10: N12 Tubulo-interstitial nephritis, not specified as acute or chronic           | MR       |

|     |                                                                                                     |          |
|-----|-----------------------------------------------------------------------------------------------------|----------|
| N13 | Diagnoses - main ICD10: N13 Obstructive and reflux uropathy                                         | MR, LDSC |
| N17 | Diagnoses - main ICD10: N17 Acute renal failure                                                     | MR, LDSC |
| N18 | Diagnoses - main ICD10: N18 Chronic renal failure                                                   | MR, LDSC |
| N19 | Diagnoses - main ICD10: N19 Unspecified renal failure                                               | MR, LDSC |
| N20 | Diagnoses - main ICD10: N20 Calculus of kidney and ureter                                           | MR, LDSC |
| N21 | Diagnoses - main ICD10: N21 Calculus of lower urinary tract                                         | MR, LDSC |
| N23 | Diagnoses - main ICD10: N23 Unspecified renal colic                                                 | MR, LDSC |
| N28 | Diagnoses - main ICD10: N28 Other disorders of kidney and ureter, not elsewhere classified          | MR, LDSC |
| N30 | Diagnoses - main ICD10: N30 Cystitis                                                                | MR, LDSC |
| N31 | Diagnoses - main ICD10: N31 Neuromuscular dysfunction of bladder, not elsewhere classified          | MR       |
| N32 | Diagnoses - main ICD10: N32 Other disorders of bladder                                              | MR, LDSC |
| N34 | Diagnoses - main ICD10: N34 Urethritis and urethral syndrome                                        | MR, LDSC |
| N35 | Diagnoses - main ICD10: N35 Urethral stricture                                                      | MR, LDSC |
| N36 | Diagnoses - main ICD10: N36 Other disorders of urethra                                              | MR, LDSC |
| N39 | Diagnoses - main ICD10: N39 Other disorders of urinary system                                       | MR, LDSC |
| N40 | Diagnoses - main ICD10: N40 Hyperplasia of prostate                                                 | MR, LDSC |
| N41 | Diagnoses - main ICD10: N41 Inflammatory diseases of prostate                                       | MR, LDSC |
| N42 | Diagnoses - main ICD10: N42 Other disorders of prostate                                             | MR       |
| N43 | Diagnoses - main ICD10: N43 Hydrocele and spermatocele                                              | MR, LDSC |
| N45 | Diagnoses - main ICD10: N45 Orchitis and epididymitis                                               | MR       |
| N47 | Diagnoses - main ICD10: N47 Redundant prepuce, phimosis and paraphimosis                            | MR, LDSC |
| N48 | Diagnoses - main ICD10: N48 Other disorders of penis                                                | MR       |
| N49 | Diagnoses - main ICD10: N49 Inflammatory disorders of male genital organs, not elsewhere classified | MR, LDSC |
| N50 | Diagnoses - main ICD10: N50 Other disorders of male genital organs                                  | MR, LDSC |
| N60 | Diagnoses - main ICD10: N60 Benign mammary dysplasia                                                | MR, LDSC |
| N61 | Diagnoses - main ICD10: N61 Inflammatory disorders of breast                                        | MR       |
| N62 | Diagnoses - main ICD10: N62 Hypertrophy of breast                                                   | MR       |
| N63 | Diagnoses - main ICD10: N63 Unspecified lump in breast                                              | MR, LDSC |
| N64 | Diagnoses - main ICD10: N64 Other disorders of breast                                               | MR, LDSC |
| N70 | Diagnoses - main ICD10: N70 Salpingitis and oophoritis                                              | MR, LDSC |

|     |                                                                                                                 |          |
|-----|-----------------------------------------------------------------------------------------------------------------|----------|
| N71 | Diagnoses - main ICD10: N71 Inflammatory disease of uterus, except cervix                                       | MR       |
| N72 | Diagnoses - main ICD10: N72 Inflammatory disease of cervix uteri                                                | MR       |
| N73 | Diagnoses - main ICD10: N73 Other female pelvic inflammatory diseases                                           | MR       |
| N75 | Diagnoses - main ICD10: N75 Diseases of Bartholin's gland                                                       | MR, LDSC |
| N76 | Diagnoses - main ICD10: N76 Other inflammation of vagina and vulva                                              | MR, LDSC |
| N80 | Diagnoses - main ICD10: N80 Endometriosis                                                                       | MR, LDSC |
| N81 | Diagnoses - main ICD10: N81 Female genital prolapse                                                             | MR, LDSC |
| N82 | Diagnoses - main ICD10: N82 Fistulae involving female genital tract                                             | MR, LDSC |
| N83 | Diagnoses - main ICD10: N83 Noninflammatory disorders of ovary, Fallopian tube and broad ligament               | MR, LDSC |
| N84 | Diagnoses - main ICD10: N84 Polyp of female genital tract                                                       | MR, LDSC |
| N85 | Diagnoses - main ICD10: N85 Other noninflammatory disorders of uterus, except cervix                            | MR       |
| N86 | Diagnoses - main ICD10: N86 Erosion and ectropion of cervix uteri                                               | MR, LDSC |
| N87 | Diagnoses - main ICD10: N87 Dysplasia of cervix uteri                                                           | MR       |
| N88 | Diagnoses - main ICD10: N88 Other noninflammatory disorders of cervix uteri                                     | MR       |
| N89 | Diagnoses - main ICD10: N89 Other noninflammatory disorders of vagina                                           | MR       |
| N90 | Diagnoses - main ICD10: N90 Other noninflammatory disorders of vulva and perineum                               | MR       |
| N92 | Diagnoses - main ICD10: N92 Excessive, frequent and irregular menstruation                                      | MR, LDSC |
| N93 | Diagnoses - main ICD10: N93 Other abnormal uterine and vaginal bleeding                                         | MR, LDSC |
| N94 | Diagnoses - main ICD10: N94 Pain and other conditions associated with female genital organs and menstrual cycle | MR, LDSC |
| N95 | Diagnoses - main ICD10: N95 Menopausal and other perimenopausal disorders                                       | MR       |
| N97 | Diagnoses - main ICD10: N97 Female infertility                                                                  | MR, LDSC |
| N99 | Diagnoses - main ICD10: N99 Postprocedural disorders of genito-urinary system, not elsewhere classified         | MR       |
| O00 | Diagnoses - main ICD10: O00 Ectopic pregnancy                                                                   | MR, LDSC |
| O02 | Diagnoses - main ICD10: O02 Other abnormal products of conception                                               | MR, LDSC |
| O03 | Diagnoses - main ICD10: O03 Spontaneous abortion                                                                | MR, LDSC |
| O04 | Diagnoses - main ICD10: O04 Medical abortion                                                                    | MR, LDSC |
| O13 | Diagnoses - main ICD10: O13 Gestational [pregnancy-induced] hypertension without significant proteinuria        | MR       |
| O14 | Diagnoses - main ICD10: O14 Gestational [pregnancy-induced] hypertension with significant proteinuria           | MR       |
| O16 | Diagnoses - main ICD10: O16 Unspecified maternal hypertension                                                   | MR, LDSC |
| O20 | Diagnoses - main ICD10: O20 Haemorrhage in early pregnancy                                                      | MR, LDSC |

|     |                                                                                                   |          |
|-----|---------------------------------------------------------------------------------------------------|----------|
| O21 | Diagnoses - main ICD10: O21 Excessive vomiting in pregnancy                                       | MR       |
| O23 | Diagnoses - main ICD10: O23 Infections of genito-urinary tract in pregnancy                       | MR, LDSC |
| O24 | Diagnoses - main ICD10: O24 Diabetes mellitus in pregnancy                                        | MR       |
| O26 | Diagnoses - main ICD10: O26 Maternal care for other conditions predominantly related to pregnancy | MR       |
| O32 | Diagnoses - main ICD10: O32 Maternal care for known or suspected malpresentation of foetus        | MR, LDSC |
| O34 | Diagnoses - main ICD10: O34 Maternal care for known or suspected abnormality of pelvic organs     | MR       |
| O35 | Diagnoses - main ICD10: O35 Maternal care for known or suspected foetal abnormality and damage    | MR       |
| O36 | Diagnoses - main ICD10: O36 Maternal care for other known or suspected foetal problems            | MR, LDSC |
| O41 | Diagnoses - main ICD10: O41 Other disorders of amniotic fluid and membranes                       | MR       |
| O42 | Diagnoses - main ICD10: O42 Premature rupture of membranes                                        | MR, LDSC |
| O44 | Diagnoses - main ICD10: O44 Placenta praevia                                                      | MR       |
| O46 | Diagnoses - main ICD10: O46 Antepartum haemorrhage, not elsewhere classified                      | MR       |
| O47 | Diagnoses - main ICD10: O47 False labour                                                          | MR, LDSC |
| O48 | Diagnoses - main ICD10: O48 Prolonged pregnancy                                                   | MR       |
| O60 | Diagnoses - main ICD10: O60 Preterm delivery                                                      | MR, LDSC |
| O62 | Diagnoses - main ICD10: O62 Abnormalities of forces of labour                                     | MR       |
| O63 | Diagnoses - main ICD10: O63 Long labour                                                           | MR       |
| O64 | Diagnoses - main ICD10: O64 Obstructed labour due to malposition and malpresentation of foetus    | MR, LDSC |
| O66 | Diagnoses - main ICD10: O66 Other obstructed labour                                               | MR       |
| O68 | Diagnoses - main ICD10: O68 Labour and delivery complicated by foetal stress [distress]           | MR, LDSC |
| O69 | Diagnoses - main ICD10: O69 Labour and delivery complicated by umbilical cord complications       | MR, LDSC |
| O70 | Diagnoses - main ICD10: O70 Perineal laceration during delivery                                   | MR, LDSC |
| O72 | Diagnoses - main ICD10: O72 Postpartum haemorrhage                                                | MR       |
| O73 | Diagnoses - main ICD10: O73 Retained placenta and membranes, without haemorrhage                  | MR       |
| O75 | Diagnoses - main ICD10: O75 Other complications of labour and delivery, not elsewhere classified  | MR, LDSC |
| O80 | Diagnoses - main ICD10: O80 Single spontaneous delivery                                           | MR, LDSC |
| O81 | Diagnoses - main ICD10: O81 Single delivery by forceps and vacuum extractor                       | MR       |
| O82 | Diagnoses - main ICD10: O82 Single delivery by Caesarean section                                  | MR       |
| O90 | Diagnoses - main ICD10: O90 Complications of the puerperium, not elsewhere classified             | MR, LDSC |

|     |                                                                                                                                      |          |
|-----|--------------------------------------------------------------------------------------------------------------------------------------|----------|
| O99 | Diagnoses - main ICD10: O99 Other maternal diseases classifiable elsewhere but complicating pregnancy, childbirth and the puerperium | MR       |
| Q18 | Diagnoses - main ICD10: Q18 Other congenital malformations of face and neck                                                          | MR       |
| Q21 | Diagnoses - main ICD10: Q21 Congenital malformations of cardiac septa                                                                | MR       |
| Q28 | Diagnoses - main ICD10: Q28 Other congenital malformations of circulatory system                                                     | MR       |
| Q38 | Diagnoses - main ICD10: Q38 Other congenital malformations of tongue, mouth and pharynx                                              | MR, LDSC |
| Q82 | Diagnoses - main ICD10: Q82 Other congenital malformations of skin                                                                   | MR       |
| R00 | Diagnoses - main ICD10: R00 Abnormalities of heart beat                                                                              | MR       |
| R04 | Diagnoses - main ICD10: R04 Haemorrhage from respiratory passages                                                                    | MR, LDSC |
| R05 | Diagnoses - main ICD10: R05 Cough                                                                                                    | MR, LDSC |
| R06 | Diagnoses - main ICD10: R06 Abnormalities of breathing                                                                               | MR, LDSC |
| R07 | Diagnoses - main ICD10: R07 Pain in throat and chest                                                                                 | MR, LDSC |
| R09 | Diagnoses - main ICD10: R09 Other symptoms and signs involving the circulatory and respiratory systems                               | MR       |
| R10 | Diagnoses - main ICD10: R10 Abdominal and pelvic pain                                                                                | MR, LDSC |
| R11 | Diagnoses - main ICD10: R11 Nausea and vomiting                                                                                      | MR, LDSC |
| R12 | Diagnoses - main ICD10: R12 Heartburn                                                                                                | MR, LDSC |
| R13 | Diagnoses - main ICD10: R13 Dysphagia                                                                                                | MR, LDSC |
| R14 | Diagnoses - main ICD10: R14 Flatulence and related conditions                                                                        | MR, LDSC |
| R15 | Diagnoses - main ICD10: R15 Faecal incontinence                                                                                      | MR       |
| R17 | Diagnoses - main ICD10: R17 Unspecified jaundice                                                                                     | MR       |
| R18 | Diagnoses - main ICD10: R18 Ascites                                                                                                  | MR       |
| R19 | Diagnoses - main ICD10: R19 Other symptoms and signs involving the digestive system and abdomen                                      | MR, LDSC |
| R20 | Diagnoses - main ICD10: R20 Disturbances of skin sensation                                                                           | MR, LDSC |
| R21 | Diagnoses - main ICD10: R21 Rash and other nonspecific skin eruption                                                                 | MR       |
| R22 | Diagnoses - main ICD10: R22 Localised swelling, mass and lump of skin and subcutaneous tissue                                        | MR       |
| R23 | Diagnoses - main ICD10: R23 Other skin changes                                                                                       | MR, LDSC |
| R25 | Diagnoses - main ICD10: R25 Abnormal involuntary movements                                                                           | MR, LDSC |
| R26 | Diagnoses - main ICD10: R26 Abnormalities of gait and mobility                                                                       | MR, LDSC |
| R29 | Diagnoses - main ICD10: R29 Other symptoms and signs involving the nervous and musculoskeletal systems                               | MR       |
| R30 | Diagnoses - main ICD10: R30 Pain associated with micturition                                                                         | MR, LDSC |

|     |                                                                                                  |          |
|-----|--------------------------------------------------------------------------------------------------|----------|
| R31 | Diagnoses - main ICD10: R31 Unspecified haematuria                                               | MR, LDSC |
| R32 | Diagnoses - main ICD10: R32 Unspecified urinary incontinence                                     | MR, LDSC |
| R33 | Diagnoses - main ICD10: R33 Retention of urine                                                   | MR, LDSC |
| R35 | Diagnoses - main ICD10: R35 Polyuria                                                             | MR, LDSC |
| R39 | Diagnoses - main ICD10: R39 Other symptoms and signs involving the urinary system                | MR       |
| R40 | Diagnoses - main ICD10: R40 Somnolence, stupor and coma                                          | MR, LDSC |
| R41 | Diagnoses - main ICD10: R41 Other symptoms and signs involving cognitive functions and awareness | MR       |
| R42 | Diagnoses - main ICD10: R42 Dizziness and giddiness                                              | MR, LDSC |
| R47 | Diagnoses - main ICD10: R47 Speech disturbances, not elsewhere classified                        | MR, LDSC |
| R49 | Diagnoses - main ICD10: R49 Voice disturbances                                                   | MR       |
| R50 | Diagnoses - main ICD10: R50 Fever of unknown origin                                              | MR, LDSC |
| R51 | Diagnoses - main ICD10: R51 Headache                                                             | MR, LDSC |
| R52 | Diagnoses - main ICD10: R52 Pain, not elsewhere classified                                       | MR       |
| R53 | Diagnoses - main ICD10: R53 Malaise and fatigue                                                  | MR, LDSC |
| R54 | Diagnoses - main ICD10: R54 Senility                                                             | MR, LDSC |
| R55 | Diagnoses - main ICD10: R55 Syncope and collapse                                                 | MR, LDSC |
| R56 | Diagnoses - main ICD10: R56 Convulsions, not elsewhere classified                                | MR       |
| R59 | Diagnoses - main ICD10: R59 Enlarged lymph nodes                                                 | MR, LDSC |
| R60 | Diagnoses - main ICD10: R60 Oedema, not elsewhere classified                                     | MR       |
| R61 | Diagnoses - main ICD10: R61 Hyperhidrosis                                                        | MR, LDSC |
| R63 | Diagnoses - main ICD10: R63 Symptoms and signs concerning food and fluid intake                  | MR       |
| R68 | Diagnoses - main ICD10: R68 Other general symptoms and signs                                     | MR       |
| R69 | Diagnoses - main ICD10: R69 Unknown and unspecified causes of morbidity                          | MR, LDSC |
| R73 | Diagnoses - main ICD10: R73 Elevated blood glucose level                                         | MR       |
| R76 | Diagnoses - main ICD10: R76 Other abnormal immunological findings in serum                       | MR       |
| R79 | Diagnoses - main ICD10: R79 Other abnormal findings of blood chemistry                           | MR, LDSC |
| R86 | Diagnoses - main ICD10: R86 Abnormal findings in specimens from male genital organs              | MR, LDSC |
| R87 | Diagnoses - main ICD10: R87 Abnormal findings in specimens from female genital organs            | MR       |
| R90 | Diagnoses - main ICD10: R90 Abnormal findings on diagnostic imaging of central nervous system    | MR       |
| R91 | Diagnoses - main ICD10: R91 Abnormal findings on diagnostic imaging of lung                      | MR       |

|     |                                                                                                            |          |
|-----|------------------------------------------------------------------------------------------------------------|----------|
| R93 | Diagnoses - main ICD10: R93 Abnormal findings on diagnostic imaging of other body structures               | MR       |
| R94 | Diagnoses - main ICD10: R94 Abnormal results of function studies                                           | MR       |
| S00 | Diagnoses - main ICD10: S00 Superficial injury of head                                                     | MR, LDSC |
| S01 | Diagnoses - main ICD10: S01 Open wound of head                                                             | MR, LDSC |
| S02 | Diagnoses - main ICD10: S02 Fracture of skull and facial bones                                             | MR       |
| S05 | Diagnoses - main ICD10: S05 Injury of eye and orbit                                                        | MR       |
| S06 | Diagnoses - main ICD10: S06 Intracranial injury                                                            | MR       |
| S09 | Diagnoses - main ICD10: S09 Other and unspecified injuries of head                                         | MR, LDSC |
| S12 | Diagnoses - main ICD10: S12 Fracture of neck                                                               | MR, LDSC |
| S13 | Diagnoses - main ICD10: S13 Dislocation, sprain and strain of joints and ligaments at neck level           | MR, LDSC |
| S20 | Diagnoses - main ICD10: S20 Superficial injury of thorax                                                   | MR, LDSC |
| S22 | Diagnoses - main ICD10: S22 Fracture of rib(s), sternum and thoracic spine                                 | MR, LDSC |
| S27 | Diagnoses - main ICD10: S27 Injury of other and unspecified intrathoracic organs                           | MR       |
| S30 | Diagnoses - main ICD10: S30 Superficial injury of abdomen, lower back and pelvis                           | MR, LDSC |
| S31 | Diagnoses - main ICD10: S31 Open wound of abdomen, lower back and pelvis                                   | MR       |
| S32 | Diagnoses - main ICD10: S32 Fracture of lumbar spine and pelvis                                            | MR       |
| S39 | Diagnoses - main ICD10: S39 Other and unspecified injuries of abdomen, lower back and pelvis               | MR       |
| S42 | Diagnoses - main ICD10: S42 Fracture of shoulder and upper arm                                             | MR, LDSC |
| S43 | Diagnoses - main ICD10: S43 Dislocation, sprain and strain of joints and ligaments of shoulder girdle      | MR       |
| S46 | Diagnoses - main ICD10: S46 Injury of muscle and tendon at shoulder and upper arm level                    | MR, LDSC |
| S51 | Diagnoses - main ICD10: S51 Open wound of forearm                                                          | MR       |
| S52 | Diagnoses - main ICD10: S52 Fracture of forearm                                                            | MR, LDSC |
| S56 | Diagnoses - main ICD10: S56 Injury of muscle and tendon at forearm level                                   | MR, LDSC |
| S60 | Diagnoses - main ICD10: S60 Superficial injury of wrist and hand                                           | MR       |
| S61 | Diagnoses - main ICD10: S61 Open wound of wrist and hand                                                   | MR, LDSC |
| S62 | Diagnoses - main ICD10: S62 Fracture at wrist and hand level                                               | MR, LDSC |
| S63 | Diagnoses - main ICD10: S63 Dislocation, sprain and strain of joints and ligaments at wrist and hand level | MR       |
| S64 | Diagnoses - main ICD10: S64 Injury of nerves at wrist and hand level                                       | MR       |
| S66 | Diagnoses - main ICD10: S66 Injury of muscle and tendon at wrist and hand level                            | MR, LDSC |
| S67 | Diagnoses - main ICD10: S67 Crushing injury of wrist and hand                                              | MR       |



|     |                                                                                                                           |          |
|-----|---------------------------------------------------------------------------------------------------------------------------|----------|
| S68 | Diagnoses - main ICD10: S68 Traumatic amputation of wrist and hand                                                        | MR       |
| S69 | Diagnoses - main ICD10: S69 Other and unspecified injuries of wrist and hand                                              | MR, LDSC |
| S72 | Diagnoses - main ICD10: S72 Fracture of femur                                                                             | MR, LDSC |
| S76 | Diagnoses - main ICD10: S76 Injury of muscle and tendon at hip and thigh level                                            | MR, LDSC |
| S80 | Diagnoses - main ICD10: S80 Superficial injury of lower leg                                                               | MR       |
| S81 | Diagnoses - main ICD10: S81 Open wound of lower leg                                                                       | MR       |
| S82 | Diagnoses - main ICD10: S82 Fracture of lower leg, including ankle                                                        | MR, LDSC |
| S83 | Diagnoses - main ICD10: S83 Dislocation, sprain and strain of joints and ligaments of knee                                | MR, LDSC |
| S86 | Diagnoses - main ICD10: S86 Injury of muscle and tendon at lower leg level                                                | MR, LDSC |
| S89 | Diagnoses - main ICD10: S89 Other and unspecified injuries of lower leg                                                   | MR       |
| S91 | Diagnoses - main ICD10: S91 Open wound of ankle and foot                                                                  | MR       |
| S92 | Diagnoses - main ICD10: S92 Fracture of foot, except ankle                                                                | MR, LDSC |
| S93 | Diagnoses - main ICD10: S93 Dislocation, sprain and strain of joints and ligaments at ankle and foot level                | MR       |
| T14 | Diagnoses - main ICD10: T14 Injury of unspecified body region                                                             | MR       |
| T17 | Diagnoses - main ICD10: T17 Foreign body in respiratory tract                                                             | MR, LDSC |
| T18 | Diagnoses - main ICD10: T18 Foreign body in alimentary tract                                                              | MR, LDSC |
| T39 | Diagnoses - main ICD10: T39 Poisoning by nonopioid analgesics, antipyretics and antirheumatics                            | MR, LDSC |
| T40 | Diagnoses - main ICD10: T40 Poisoning by narcotics and psychodysleptics [hallucinogens]                                   | MR, LDSC |
| T42 | Diagnoses - main ICD10: T42 Poisoning by antiepileptic, sedative-hypnotic and anti-Parkinsonism drugs                     | MR       |
| T43 | Diagnoses - main ICD10: T43 Poisoning by psychotropic drugs, not elsewhere classified                                     | MR, LDSC |
| T50 | Diagnoses - main ICD10: T50 Poisoning by diuretics and other and unspecified drugs, medicaments and biological substances | MR, LDSC |
| T78 | Diagnoses - main ICD10: T78 Adverse effects, not elsewhere classified                                                     | MR       |
| T79 | Diagnoses - main ICD10: T79 Certain early complications of trauma, not elsewhere classified                               | MR, LDSC |
| T81 | Diagnoses - main ICD10: T81 Complications of procedures, not elsewhere classified                                         | MR, LDSC |
| T82 | Diagnoses - main ICD10: T82 Complications of cardiac and vascular prosthetic devices, implants and grafts                 | MR       |
| T83 | Diagnoses - main ICD10: T83 Complications of genito-urinary prosthetic devices, implants and grafts                       | MR, LDSC |
| T84 | Diagnoses - main ICD10: T84 Complications of internal orthopaedic prosthetic devices, implants and grafts                 | MR, LDSC |
| T85 | Diagnoses - main ICD10: T85 Complications of other internal prosthetic devices, implants and grafts                       | MR       |
| T86 | Diagnoses - main ICD10: T86 Failure and rejection of transplanted organs and tissues                                      | MR, LDSC |

|     |                                                                                                                              |          |
|-----|------------------------------------------------------------------------------------------------------------------------------|----------|
| T87 | Diagnoses - main ICD10: T87 Complications peculiar to reattachment and amputation                                            | MR       |
| T88 | Diagnoses - main ICD10: T88 Other complications of surgical and medical care, not elsewhere classified                       | MR       |
| Z00 | Diagnoses - main ICD10: Z00 General examination and investigation of persons without complaint or reported diagnosis         | MR, LDSC |
| Z01 | Diagnoses - main ICD10: Z01 Other special examinations and investigations of persons without complaint or reported diagnosis | MR, LDSC |
| Z03 | Diagnoses - main ICD10: Z03 Medical observation and evaluation for suspected diseases and conditions                         | MR, LDSC |
| Z04 | Diagnoses - main ICD10: Z04 Examination and observation for other reasons                                                    | MR       |
| Z08 | Diagnoses - main ICD10: Z08 Follow-up examination after treatment for malignant neoplasm                                     | MR, LDSC |
| Z09 | Diagnoses - main ICD10: Z09 Follow-up examination after treatment for conditions other than malignant neoplasms              | MR, LDSC |
| Z11 | Diagnoses - main ICD10: Z11 Special screening examination for infectious and parasitic diseases                              | MR       |
| Z12 | Diagnoses - main ICD10: Z12 Special screening examination for neoplasms                                                      | MR, LDSC |
| Z13 | Diagnoses - main ICD10: Z13 Special screening examination for other diseases and disorders                                   | MR       |
| Z30 | Diagnoses - main ICD10: Z30 Contraceptive management                                                                         | MR, LDSC |
| Z31 | Diagnoses - main ICD10: Z31 Procreative management                                                                           | MR       |
| Z32 | Diagnoses - main ICD10: Z32 Pregnancy examination and test                                                                   | MR       |
| Z34 | Diagnoses - main ICD10: Z34 Supervision of normal pregnancy                                                                  | MR, LDSC |
| Z35 | Diagnoses - main ICD10: Z35 Supervision of high-risk pregnancy                                                               | MR, LDSC |
| Z36 | Diagnoses - main ICD10: Z36 Antenatal screening                                                                              | MR, LDSC |
| Z39 | Diagnoses - main ICD10: Z39 Postpartum care and examination                                                                  | MR       |
| Z40 | Diagnoses - main ICD10: Z40 Prophylactic surgery                                                                             | MR       |
| Z41 | Diagnoses - main ICD10: Z41 Procedures for purposes other than remedying health state                                        | MR       |
| Z42 | Diagnoses - main ICD10: Z42 Follow-up care involving plastic surgery                                                         | MR, LDSC |
| Z43 | Diagnoses - main ICD10: Z43 Attention to artificial openings                                                                 | MR       |
| Z44 | Diagnoses - main ICD10: Z44 Fitting and adjustment of external prosthetic device                                             | MR, LDSC |
| Z45 | Diagnoses - main ICD10: Z45 Adjustment and management of implanted device                                                    | MR, LDSC |
| Z46 | Diagnoses - main ICD10: Z46 Fitting and adjustment of other devices                                                          | MR, LDSC |
| Z47 | Diagnoses - main ICD10: Z47 Other orthopaedic follow-up care                                                                 | MR, LDSC |
| Z48 | Diagnoses - main ICD10: Z48 Other surgical follow-up care                                                                    | MR, LDSC |
| Z50 | Diagnoses - main ICD10: Z50 Care involving use of rehabilitation procedures                                                  | MR       |
| Z51 | Diagnoses - main ICD10: Z51 Other medical care                                                                               | MR, LDSC |

|     |                                                                                                                                     |          |
|-----|-------------------------------------------------------------------------------------------------------------------------------------|----------|
| Z52 | Diagnoses - main ICD10: Z52 Donors of organs and tissues                                                                            | MR, LDSC |
| Z53 | Diagnoses - main ICD10: Z53 Persons encountering health services for specific procedures, not carried out                           | MR, LDSC |
| Z71 | Diagnoses - main ICD10: Z71 Persons encountering health services for other counselling and medical advice, not elsewhere classified | MR, LDSC |
| Z76 | Diagnoses - main ICD10: Z76 Persons encountering health services in other circumstances                                             | MR       |
| Z80 | Diagnoses - main ICD10: Z80 Family history of malignant neoplasm                                                                    | MR, LDSC |
| Z85 | Diagnoses - main ICD10: Z85 Personal history of malignant neoplasm                                                                  | MR       |
| Z87 | Diagnoses - main ICD10: Z87 Personal history of other diseases and conditions                                                       | MR       |

**Table S3:** List of the MR methods used in the study.

| <b>Method</b>                   |
|---------------------------------|
| Egger fixed effects - steiger   |
| Egger fixed effects - tophits   |
| Egger random effects - steiger  |
| Egger random effects - tophits  |
| IVW fixed effects - steiger     |
| IVW fixed effects - tophits     |
| IVW random effects - steiger    |
| IVW random effects - tophits    |
| Penalised median - steiger      |
| Penalised median - tophits      |
| Rucker mean (JK) - steiger      |
| Rucker mean (JK) - tophits      |
| Rucker median (JK) - steiger    |
| Rucker median (JK) - tophits    |
| Rucker point estimate - steiger |
| Rucker point estimate - tophits |
| Simple median - steiger         |
| Simple median - tophits         |
| Simple mode - steiger           |
| Simple mode - tophits           |
| Simple mode (NOME) - steiger    |
| Simple mode (NOME) - tophits    |
| Weighted median - steiger       |
| Weighted median - tophits       |
| Weighted mode - steiger         |
| Weighted mode - tophits         |
| Weighted mode (NOME) - steiger  |
| Weighted mode (NOME) - tophits  |

**Table S4:** Significant causal associations identified using TSH genetic instrument (FDR  $q < 0.05$ ).

| Phenotypes                                      | Method                        | Estimate | SE     | P        | FDR      |
|-------------------------------------------------|-------------------------------|----------|--------|----------|----------|
| Self-reported: hypothyroidism                   | Penalised median - steiger    | 0.020    | 0.0023 | 2.39E-17 | 1.68E-12 |
| ICD10: non-toxic goitre                         | IVW fixed effects - tophits   | -0.002   | 0.0001 | 9.45E-14 | 8.29E-10 |
| Impedance of arm (left)                         | IVW fixed effects - tophits   | -0.029   | 0.0017 | 2.22E-13 | 1.30E-09 |
| Treatment/medication code: levothyroxine sodium | IVW fixed effects - tophits   | 0.017    | 0.0008 | 2.41E-13 | 1.30E-09 |
| Impedance of arm (right)                        | IVW fixed effects - tophits   | -0.024   | 0.0018 | 9.60E-12 | 3.74E-08 |
| Self-reported deep venous thrombosis (DVT)      | Egger fixed effects - tophits | -0.009   | 0.0007 | 1.70E-10 | 5.42E-07 |
| Standing height                                 | IVW fixed effects - tophits   | -0.023   | 0.0019 | 2.76E-10 | 8.07E-07 |
| Blood clot in the leg diagnosed by doctor       | IVW fixed effects - tophits   | 0.003    | 0.0003 | 3.09E-10 | 8.34E-07 |
| Comparative height size at age 10               | IVW fixed effects - tophits   | -0.028   | 0.0026 | 1.74E-09 | 4.21E-06 |
| Pulse rate, automated reading                   | IVW fixed effects - tophits   | -0.037   | 0.0041 | 2.84E-08 | 5.24E-05 |
| Treatment/medication code: thyroxine product    | IVW fixed effects - tophits   | 0.005    | 0.0005 | 3.34E-08 | 5.86E-05 |
| Impedance of whole body                         | IVW fixed effects - tophits   | -0.022   | 0.0027 | 4.43E-08 | 7.06E-05 |
| ICD10: Phlebitis and thrombophlebitis           | Egger fixed effects - tophits | -0.003   | 0.0004 | 5.94E-08 | 8.55E-05 |
| Self-reported hyperthyroidism                   | IVW fixed effects - tophits   | -0.004   | 0.0004 | 7.49E-08 | 1.01E-04 |
| ICD10: I26 Pulmonary embolism                   | Egger fixed effects - tophits | -0.003   | 0.0005 | 1.01E-06 | 0.001    |
| Self-reported pulmonary embolism +/- DVT        | Egger fixed effects - tophits | -0.004   | 0.0005 | 2.65E-06 | 0.003    |
| Self-reported thyroid problem (not cancer)      | IVW fixed effects - tophits   | -0.001   | 0.0002 | 3.71E-06 | 0.004    |
| Trunk predicted mass                            | Egger fixed effects - tophits | 0.032    | 0.0050 | 3.89E-06 | 0.004    |
| Trunk fat-free mass                             | Egger fixed effects - tophits | 0.032    | 0.0049 | 4.07E-06 | 0.004    |
| ICD10: Female infertility                       | IVW random effects - tophits  | 0.001    | 0.0002 | 4.91E-06 | 0.005    |
| Blood clot in the lung diagnosed by doctor      | Egger fixed effects - tophits | -0.003   | 0.0005 | 5.76E-06 | 0.005    |
| Arm fat-free mass (left)                        | Egger fixed effects - tophits | 0.031    | 0.0053 | 1.45E-05 | 0.012    |
| Hip circumference                               | IVW fixed effects - tophits   | -0.022   | 0.0039 | 1.51E-05 | 0.012    |
| Trunk fat percentage                            | Egger fixed effects - tophits | -0.048   | 0.0087 | 2.23E-05 | 0.017    |
| Arm predicted mass (right)                      | Egger fixed effects - tophits | 0.028    | 0.0051 | 3.07E-05 | 0.021    |
| Arm fat-free mass (right)                       | Egger fixed effects - tophits | 0.026    | 0.0050 | 4.59E-05 | 0.031    |
| Arm predicted mass (left)                       | Egger fixed effects - tophits | 0.027    | 0.0052 | 5.01E-05 | 0.033    |
| Hearing aid user                                | Rucker median (JK) - tophits  | -0.005   | 0.0010 | 7.10E-05 | 0.045    |
| self-reported high cholesterol                  | IVW fixed effects - tophits   | 0.006    | 0.0011 | 7.48E-05 | 0.046    |

**Table S5.** Significant causal associations identified using TSH genetic instrument with the corresponding sensitivity analyses.

| Phenotype (MR-Egger: Intercept, p-value)    | Method                          | Beta (positive=red;<br>negative=blue) | SE       | P        |
|---------------------------------------------|---------------------------------|---------------------------------------|----------|----------|
| Arm fat-free mass (left) (-0.002497, 0.229) | Egger fixed effects - steiger   | 3.07E-02                              | 5.32E-03 | 1.45E-05 |
|                                             | Egger fixed effects - tophits   | 3.07E-02                              | 5.32E-03 | 1.45E-05 |
|                                             | Egger random effects - steiger  | 3.07E-02                              | 2.12E-02 | 1.63E-01 |
|                                             | Egger random effects - tophits  | 3.07E-02                              | 2.12E-02 | 1.63E-01 |
|                                             | IVW fixed effects - steiger     | 6.46E-03                              | 2.03E-03 | 4.65E-03 |
|                                             | IVW fixed effects - tophits     | 6.46E-03                              | 2.03E-03 | 4.65E-03 |
|                                             | IVW random effects - steiger    | 6.46E-03                              | 8.30E-03 | 4.45E-01 |
|                                             | IVW random effects - tophits    | 6.46E-03                              | 8.30E-03 | 4.45E-01 |
|                                             | Penalised median - steiger      | -1.28E-03                             | 6.74E-03 | 8.49E-01 |
|                                             | Penalised median - tophits      | -1.28E-03                             | 6.87E-03 | 8.52E-01 |
|                                             | Rucker mean (JK) - steiger      | 3.05E-02                              | 2.28E-02 | 1.97E-01 |
|                                             | Rucker mean (JK) - tophits      | 3.00E-02                              | 2.41E-02 | 2.29E-01 |
|                                             | Rucker median (JK) - steiger    | 2.93E-02                              | 2.62E-02 | 2.77E-01 |
|                                             | Rucker median (JK) - tophits    | 2.95E-02                              | 2.71E-02 | 2.90E-01 |
|                                             | Rucker point estimate - steiger | 3.07E-02                              | 2.12E-02 | 1.63E-01 |
|                                             | Rucker point estimate - tophits | 3.07E-02                              | 2.12E-02 | 1.63E-01 |
|                                             | Simple median - steiger         | -4.61E-04                             | 7.62E-03 | 9.52E-01 |
|                                             | Simple median - tophits         | -4.61E-04                             | 7.72E-03 | 9.52E-01 |
|                                             | Simple mode - steiger           | 1.53E-03                              | 1.41E-02 | 9.14E-01 |
|                                             | Simple mode - tophits           | 1.53E-03                              | 1.27E-02 | 9.05E-01 |
|                                             | Simple mode (NOME) - steiger    | 1.53E-03                              | 1.39E-02 | 9.13E-01 |
|                                             | Simple mode (NOME) - tophits    | 1.53E-03                              | 1.26E-02 | 9.04E-01 |
|                                             | Weighted median - steiger       | -7.68E-04                             | 6.77E-03 | 9.10E-01 |
|                                             | Weighted median - tophits       | -7.68E-04                             | 6.96E-03 | 9.12E-01 |
| Weighted mode - steiger                     | -2.76E-03                       | 8.06E-03                              | 7.35E-01 |          |
| Weighted mode - tophits                     | -2.76E-03                       | 7.40E-03                              | 7.13E-01 |          |
| Weighted mode (NOME) - steiger              | -2.15E-03                       | 8.04E-03                              | 7.92E-01 |          |

|                                              |                                 |                  |          |          |
|----------------------------------------------|---------------------------------|------------------|----------|----------|
|                                              | Weighted mode (NOME) - tophits  | <b>-2.15E-03</b> | 7.67E-03 | 7.82E-01 |
| Arm fat-free mass (right) (-0.002126, 0.314) | Egger fixed effects - steiger   | <b>2.62E-02</b>  | 5.00E-03 | 4.59E-05 |
|                                              | Egger fixed effects - tophits   | <b>2.62E-02</b>  | 5.00E-03 | 4.59E-05 |
|                                              | Egger random effects - steiger  | <b>2.62E-02</b>  | 2.16E-02 | 2.40E-01 |
|                                              | Egger random effects - tophits  | <b>2.62E-02</b>  | 2.16E-02 | 2.40E-01 |
|                                              | IVW fixed effects - steiger     | <b>5.58E-03</b>  | 1.93E-03 | 9.04E-03 |
|                                              | IVW fixed effects - tophits     | <b>5.58E-03</b>  | 1.93E-03 | 9.04E-03 |
|                                              | IVW random effects - steiger    | <b>5.58E-03</b>  | 8.38E-03 | 5.13E-01 |
|                                              | IVW random effects - tophits    | <b>5.58E-03</b>  | 8.38E-03 | 5.13E-01 |
|                                              | Penalised median - steiger      | <b>-4.28E-03</b> | 6.47E-03 | 5.08E-01 |
|                                              | Penalised median - tophits      | <b>-4.28E-03</b> | 6.72E-03 | 5.24E-01 |
|                                              | Rucker mean (JK) - steiger      | <b>2.61E-02</b>  | 2.26E-02 | 2.62E-01 |
|                                              | Rucker mean (JK) - tophits      | <b>2.49E-02</b>  | 2.24E-02 | 2.78E-01 |
|                                              | Rucker median (JK) - steiger    | <b>2.23E-02</b>  | 2.40E-02 | 3.64E-01 |
|                                              | Rucker median (JK) - tophits    | <b>1.97E-02</b>  | 2.32E-02 | 4.06E-01 |
|                                              | Rucker point estimate - steiger | <b>2.62E-02</b>  | 2.16E-02 | 2.40E-01 |
|                                              | Rucker point estimate - tophits | <b>2.62E-02</b>  | 2.16E-02 | 2.40E-01 |
|                                              | Simple median - steiger         | <b>1.07E-02</b>  | 7.81E-03 | 1.73E-01 |
|                                              | Simple median - tophits         | <b>1.07E-02</b>  | 7.72E-03 | 1.68E-01 |
|                                              | Simple mode - steiger           | <b>8.83E-03</b>  | 1.46E-02 | 5.51E-01 |
|                                              | Simple mode - tophits           | <b>8.83E-03</b>  | 1.45E-02 | 5.48E-01 |
|                                              | Simple mode (NOME) - steiger    | <b>8.83E-03</b>  | 1.64E-02 | 5.96E-01 |
|                                              | Simple mode (NOME) - tophits    | <b>8.83E-03</b>  | 1.58E-02 | 5.81E-01 |
|                                              | Weighted median - steiger       | <b>1.83E-04</b>  | 6.85E-03 | 9.79E-01 |
|                                              | Weighted median - tophits       | <b>1.83E-04</b>  | 6.74E-03 | 9.78E-01 |
| Weighted mode - steiger                      | <b>-2.99E-03</b>                | 7.92E-03         | 7.09E-01 |          |
| Weighted mode - tophits                      | <b>-2.99E-03</b>                | 7.69E-03         | 7.01E-01 |          |
| Weighted mode (NOME) - steiger               | <b>-2.40E-03</b>                | 8.00E-03         | 7.67E-01 |          |
| Weighted mode (NOME) - tophits               | <b>-2.40E-03</b>                | 8.58E-03         | 7.82E-01 |          |
| Arm predicted mass (left) (-0.002323, 0.271) | Egger fixed effects - steiger   | <b>2.70E-02</b>  | 5.18E-03 | 5.01E-05 |

|                                               |                                 |                  |          |          |
|-----------------------------------------------|---------------------------------|------------------|----------|----------|
|                                               | Egger fixed effects - tophits   | <b>2.70E-02</b>  | 5.18E-03 | 5.01E-05 |
|                                               | Egger random effects - steiger  | <b>2.70E-02</b>  | 2.16E-02 | 2.26E-01 |
|                                               | Egger random effects - tophits  | <b>2.70E-02</b>  | 2.16E-02 | 2.26E-01 |
|                                               | IVW fixed effects - steiger     | <b>4.42E-03</b>  | 1.99E-03 | 3.79E-02 |
|                                               | IVW fixed effects - tophits     | <b>4.42E-03</b>  | 1.99E-03 | 3.79E-02 |
|                                               | IVW random effects - steiger    | <b>4.42E-03</b>  | 8.40E-03 | 6.04E-01 |
|                                               | IVW random effects - tophits    | <b>4.42E-03</b>  | 8.40E-03 | 6.04E-01 |
|                                               | Penalised median - steiger      | <b>-5.37E-03</b> | 6.28E-03 | 3.92E-01 |
|                                               | Penalised median - tophits      | <b>-5.37E-03</b> | 6.30E-03 | 3.93E-01 |
|                                               | Rucker mean (JK) - steiger      | <b>2.68E-02</b>  | 2.33E-02 | 2.63E-01 |
|                                               | Rucker mean (JK) - tophits      | <b>2.59E-02</b>  | 2.27E-02 | 2.67E-01 |
|                                               | Rucker median (JK) - steiger    | <b>2.38E-02</b>  | 2.60E-02 | 3.71E-01 |
|                                               | Rucker median (JK) - tophits    | <b>2.26E-02</b>  | 2.51E-02 | 3.78E-01 |
|                                               | Rucker point estimate - steiger | <b>2.70E-02</b>  | 2.16E-02 | 2.26E-01 |
|                                               | Rucker point estimate - tophits | <b>2.70E-02</b>  | 2.16E-02 | 2.26E-01 |
|                                               | Simple median - steiger         | <b>4.84E-03</b>  | 7.39E-03 | 5.13E-01 |
|                                               | Simple median - tophits         | <b>4.84E-03</b>  | 7.85E-03 | 5.37E-01 |
|                                               | Simple mode - steiger           | <b>1.52E-03</b>  | 1.37E-02 | 9.13E-01 |
|                                               | Simple mode - tophits           | <b>1.52E-03</b>  | 1.39E-02 | 9.14E-01 |
|                                               | Simple mode (NOME) - steiger    | <b>1.52E-03</b>  | 1.46E-02 | 9.18E-01 |
|                                               | Simple mode (NOME) - tophits    | <b>1.52E-03</b>  | 1.40E-02 | 9.15E-01 |
|                                               | Weighted median - steiger       | <b>-2.11E-03</b> | 7.01E-03 | 7.63E-01 |
|                                               | Weighted median - tophits       | <b>-2.11E-03</b> | 6.74E-03 | 7.54E-01 |
|                                               | Weighted mode - steiger         | <b>-5.62E-03</b> | 7.43E-03 | 4.59E-01 |
|                                               | Weighted mode - tophits         | <b>-5.62E-03</b> | 7.70E-03 | 4.74E-01 |
|                                               | Weighted mode (NOME) - steiger  | <b>-5.62E-03</b> | 8.33E-03 | 5.08E-01 |
|                                               | Weighted mode (NOME) - tophits  | <b>-5.62E-03</b> | 7.91E-03 | 4.86E-01 |
| Arm predicted mass (right) (-0.002210, 0.286) | Egger fixed effects - steiger   | <b>2.75E-02</b>  | 5.07E-03 | 3.07E-05 |
|                                               | Egger fixed effects - tophits   | <b>2.75E-02</b>  | 5.07E-03 | 3.07E-05 |
|                                               | Egger random effects - steiger  | <b>2.75E-02</b>  | 2.12E-02 | 2.09E-01 |



|                                                                                                                                              |                                 |                  |          |          |
|----------------------------------------------------------------------------------------------------------------------------------------------|---------------------------------|------------------|----------|----------|
|                                                                                                                                              | Egger random effects - tophits  | <b>2.75E-02</b>  | 2.12E-02 | 2.09E-01 |
|                                                                                                                                              | IVW fixed effects - steiger     | <b>6.06E-03</b>  | 1.95E-03 | 5.52E-03 |
|                                                                                                                                              | IVW fixed effects - tophits     | <b>6.06E-03</b>  | 1.95E-03 | 5.52E-03 |
|                                                                                                                                              | IVW random effects - steiger    | <b>6.06E-03</b>  | 8.23E-03 | 4.70E-01 |
|                                                                                                                                              | IVW random effects - tophits    | <b>6.06E-03</b>  | 8.23E-03 | 4.70E-01 |
|                                                                                                                                              | Penalised median - steiger      | <b>-1.39E-03</b> | 6.72E-03 | 8.36E-01 |
|                                                                                                                                              | Penalised median - tophits      | <b>-1.39E-03</b> | 6.85E-03 | 8.39E-01 |
|                                                                                                                                              | Rucker mean (JK) - steiger      | <b>2.73E-02</b>  | 2.10E-02 | 2.10E-01 |
|                                                                                                                                              | Rucker mean (JK) - tophits      | <b>2.78E-02</b>  | 2.26E-02 | 2.34E-01 |
|                                                                                                                                              | Rucker median (JK) - steiger    | <b>2.62E-02</b>  | 2.33E-02 | 2.74E-01 |
|                                                                                                                                              | Rucker median (JK) - tophits    | <b>2.54E-02</b>  | 2.49E-02 | 3.19E-01 |
|                                                                                                                                              | Rucker point estimate - steiger | <b>2.75E-02</b>  | 2.12E-02 | 2.09E-01 |
|                                                                                                                                              | Rucker point estimate - tophits | <b>2.75E-02</b>  | 2.12E-02 | 2.09E-01 |
|                                                                                                                                              | Simple median - steiger         | <b>8.24E-03</b>  | 7.63E-03 | 2.81E-01 |
|                                                                                                                                              | Simple median - tophits         | <b>8.24E-03</b>  | 7.39E-03 | 2.65E-01 |
|                                                                                                                                              | Simple mode - steiger           | <b>6.65E-03</b>  | 1.35E-02 | 6.28E-01 |
|                                                                                                                                              | Simple mode - tophits           | <b>6.65E-03</b>  | 1.39E-02 | 6.38E-01 |
|                                                                                                                                              | Simple mode (NOME) - steiger    | <b>6.65E-03</b>  | 1.44E-02 | 6.50E-01 |
|                                                                                                                                              | Simple mode (NOME) - tophits    | <b>6.65E-03</b>  | 1.38E-02 | 6.34E-01 |
|                                                                                                                                              | Weighted median - steiger       | <b>3.95E-03</b>  | 6.91E-03 | 5.68E-01 |
|                                                                                                                                              | Weighted median - tophits       | <b>3.95E-03</b>  | 6.65E-03 | 5.53E-01 |
|                                                                                                                                              | Weighted mode - steiger         | <b>-2.50E-03</b> | 8.02E-03 | 7.59E-01 |
|                                                                                                                                              | Weighted mode - tophits         | <b>-2.50E-03</b> | 8.43E-03 | 7.70E-01 |
|                                                                                                                                              | Weighted mode (NOME) - steiger  | <b>-2.50E-03</b> | 8.63E-03 | 7.75E-01 |
|                                                                                                                                              | Weighted mode (NOME) - tophits  | <b>-2.50E-03</b> | 8.19E-03 | 7.64E-01 |
| Blood clot, DVT, bronchitis, emphysema, asthma, rhinitis, eczema, allergy diagnosed by doctor: Blood clot in the leg (DVT) (0.001002, 0.230) | Egger fixed effects - steiger   | <b>-6.88E-03</b> | 6.56E-04 | 2.42E-09 |
|                                                                                                                                              | Egger fixed effects - tophits   | <b>-6.88E-03</b> | 6.56E-04 | 2.42E-09 |
|                                                                                                                                              | Egger random effects - steiger  | <b>-6.88E-03</b> | 8.59E-03 | 4.33E-01 |
|                                                                                                                                              | Egger random effects - tophits  | <b>-6.88E-03</b> | 8.59E-03 | 4.33E-01 |
|                                                                                                                                              | IVW fixed effects - steiger     | <b>2.91E-03</b>  | 2.54E-04 | 3.09E-10 |

|                                                                                                                                         |                                 |                  |          |          |
|-----------------------------------------------------------------------------------------------------------------------------------------|---------------------------------|------------------|----------|----------|
|                                                                                                                                         | IVW fixed effects - tophits     | <b>2.91E-03</b>  | 2.54E-04 | 3.09E-10 |
|                                                                                                                                         | IVW random effects - steiger    | <b>2.91E-03</b>  | 3.42E-03 | 4.05E-01 |
|                                                                                                                                         | IVW random effects - tophits    | <b>2.91E-03</b>  | 3.42E-03 | 4.05E-01 |
|                                                                                                                                         | Penalised median - steiger      | <b>2.07E-03</b>  | 1.31E-03 | 1.15E-01 |
|                                                                                                                                         | Penalised median - tophits      | <b>2.07E-03</b>  | 1.32E-03 | 1.17E-01 |
|                                                                                                                                         | Rucker mean (JK) - steiger      | <b>-6.87E-03</b> | 7.49E-03 | 3.70E-01 |
|                                                                                                                                         | Rucker mean (JK) - tophits      | <b>-6.76E-03</b> | 7.56E-03 | 3.81E-01 |
|                                                                                                                                         | Rucker median (JK) - steiger    | <b>-6.23E-03</b> | 9.29E-03 | 5.10E-01 |
|                                                                                                                                         | Rucker median (JK) - tophits    | <b>-6.06E-03</b> | 8.90E-03 | 5.04E-01 |
|                                                                                                                                         | Rucker point estimate - steiger | <b>-6.88E-03</b> | 8.59E-03 | 4.33E-01 |
|                                                                                                                                         | Rucker point estimate - tophits | <b>-6.88E-03</b> | 8.59E-03 | 4.33E-01 |
|                                                                                                                                         | Simple median - steiger         | <b>1.77E-03</b>  | 1.42E-03 | 2.13E-01 |
|                                                                                                                                         | Simple median - tophits         | <b>1.77E-03</b>  | 1.43E-03 | 2.15E-01 |
|                                                                                                                                         | Simple mode - steiger           | <b>1.17E-03</b>  | 2.12E-03 | 5.87E-01 |
|                                                                                                                                         | Simple mode - tophits           | <b>1.17E-03</b>  | 2.06E-03 | 5.76E-01 |
|                                                                                                                                         | Simple mode (NOME) - steiger    | <b>1.17E-03</b>  | 2.23E-03 | 6.07E-01 |
|                                                                                                                                         | Simple mode (NOME) - tophits    | <b>1.17E-03</b>  | 2.15E-03 | 5.92E-01 |
|                                                                                                                                         | Weighted median - steiger       | <b>1.87E-03</b>  | 1.33E-03 | 1.59E-01 |
|                                                                                                                                         | Weighted median - tophits       | <b>1.87E-03</b>  | 1.27E-03 | 1.41E-01 |
|                                                                                                                                         | Weighted mode - steiger         | <b>1.64E-03</b>  | 1.85E-03 | 3.86E-01 |
|                                                                                                                                         | Weighted mode - tophits         | <b>1.64E-03</b>  | 1.88E-03 | 3.93E-01 |
|                                                                                                                                         | Weighted mode (NOME) - steiger  | <b>1.64E-03</b>  | 1.96E-03 | 4.11E-01 |
|                                                                                                                                         | Weighted mode (NOME) - tophits  | <b>1.64E-03</b>  | 1.83E-03 | 3.81E-01 |
| Blood clot, DVT, bronchitis, emphysema, asthma, rhinitis, eczema, allergy diagnosed by doctor: Blood clot in the lung (0.000424, 0.310) | Egger fixed effects - steiger   | <b>-3.30E-03</b> | 5.32E-04 | 5.76E-06 |
|                                                                                                                                         | Egger fixed effects - tophits   | <b>-3.30E-03</b> | 5.32E-04 | 5.76E-06 |
|                                                                                                                                         | Egger random effects - steiger  | <b>-3.30E-03</b> | 4.33E-03 | 4.54E-01 |
|                                                                                                                                         | Egger random effects - tophits  | <b>-3.30E-03</b> | 4.33E-03 | 4.54E-01 |
|                                                                                                                                         | IVW fixed effects - steiger     | <b>8.43E-04</b>  | 2.09E-04 | 6.40E-04 |
|                                                                                                                                         | IVW fixed effects - tophits     | <b>8.43E-04</b>  | 2.09E-04 | 6.40E-04 |
|                                                                                                                                         | IVW random effects - steiger    | <b>8.43E-04</b>  | 1.70E-03 | 6.26E-01 |

|                                                             |                                 |           |          |          |
|-------------------------------------------------------------|---------------------------------|-----------|----------|----------|
|                                                             | IVW random effects - tophits    | 8.43E-04  | 1.70E-03 | 6.26E-01 |
|                                                             | Penalised median - steiger      | -1.03E-04 | 8.82E-04 | 9.07E-01 |
|                                                             | Penalised median - tophits      | -1.03E-04 | 8.66E-04 | 9.05E-01 |
|                                                             | Rucker mean (JK) - steiger      | -3.19E-03 | 3.52E-03 | 3.76E-01 |
|                                                             | Rucker mean (JK) - tophits      | -3.38E-03 | 3.85E-03 | 3.90E-01 |
|                                                             | Rucker median (JK) - steiger    | -2.51E-03 | 3.64E-03 | 4.99E-01 |
|                                                             | Rucker median (JK) - tophits    | -2.85E-03 | 4.05E-03 | 4.90E-01 |
|                                                             | Rucker point estimate - steiger | -3.30E-03 | 4.33E-03 | 4.54E-01 |
|                                                             | Rucker point estimate - tophits | -3.30E-03 | 4.33E-03 | 4.54E-01 |
|                                                             | Simple median - steiger         | -3.80E-04 | 9.36E-04 | 6.85E-01 |
|                                                             | Simple median - tophits         | -3.80E-04 | 9.67E-04 | 6.95E-01 |
|                                                             | Simple mode - steiger           | -5.87E-04 | 1.42E-03 | 6.84E-01 |
|                                                             | Simple mode - tophits           | -5.87E-04 | 1.53E-03 | 7.05E-01 |
|                                                             | Simple mode (NOME) - steiger    | -5.87E-04 | 1.44E-03 | 6.88E-01 |
|                                                             | Simple mode (NOME) - tophits    | -5.87E-04 | 1.34E-03 | 6.65E-01 |
|                                                             | Weighted median - steiger       | -5.36E-05 | 8.88E-04 | 9.52E-01 |
|                                                             | Weighted median - tophits       | -5.36E-05 | 8.75E-04 | 9.51E-01 |
|                                                             | Weighted mode - steiger         | 2.41E-04  | 1.07E-03 | 8.25E-01 |
|                                                             | Weighted mode - tophits         | 2.41E-04  | 1.09E-03 | 8.27E-01 |
|                                                             | Weighted mode (NOME) - steiger  | 2.41E-04  | 1.11E-03 | 8.31E-01 |
|                                                             | Weighted mode (NOME) - tophits  | 2.41E-04  | 1.09E-03 | 8.27E-01 |
| <u>Comparative height size at age 10 (-0.000089, 0.964)</u> | Egger fixed effects - steiger   | -2.71E-02 | 6.44E-03 | 5.32E-04 |
|                                                             | Egger fixed effects - tophits   | -2.71E-02 | 6.44E-03 | 5.32E-04 |
|                                                             | Egger random effects - steiger  | -2.71E-02 | 2.05E-02 | 2.04E-01 |
|                                                             | Egger random effects - tophits  | -2.71E-02 | 2.05E-02 | 2.04E-01 |
|                                                             | IVW fixed effects - steiger     | -2.79E-02 | 2.61E-03 | 1.74E-09 |
|                                                             | IVW fixed effects - tophits     | -2.79E-02 | 2.61E-03 | 1.74E-09 |
|                                                             | IVW random effects - steiger    | -2.79E-02 | 7.88E-03 | 2.17E-03 |
|                                                             | IVW random effects - tophits    | -2.79E-02 | 7.88E-03 | 2.17E-03 |
|                                                             | Penalised median - steiger      | -2.22E-02 | 7.99E-03 | 5.40E-03 |

|                                                                                     |                                 |                  |          |          |
|-------------------------------------------------------------------------------------|---------------------------------|------------------|----------|----------|
|                                                                                     | Penalised median - tophits      | <b>-2.22E-02</b> | 7.62E-03 | 3.51E-03 |
|                                                                                     | Rucker mean (JK) - steiger      | <b>-2.40E-02</b> | 2.13E-02 | 2.74E-01 |
|                                                                                     | Rucker mean (JK) - tophits      | <b>-2.45E-02</b> | 2.01E-02 | 2.37E-01 |
|                                                                                     | Rucker median (JK) - steiger    | <b>-2.60E-02</b> | 1.31E-02 | 6.20E-02 |
|                                                                                     | Rucker median (JK) - tophits    | <b>-2.67E-02</b> | 1.23E-02 | 4.29E-02 |
|                                                                                     | Rucker point estimate - steiger | <b>-2.79E-02</b> | 7.88E-03 | 2.17E-03 |
|                                                                                     | Rucker point estimate - tophits | <b>-2.79E-02</b> | 7.88E-03 | 2.17E-03 |
|                                                                                     | Simple median - steiger         | <b>-2.47E-02</b> | 7.99E-03 | 2.05E-03 |
|                                                                                     | Simple median - tophits         | <b>-2.47E-02</b> | 7.86E-03 | 1.71E-03 |
|                                                                                     | Simple mode - steiger           | <b>-2.65E-02</b> | 1.45E-02 | 8.39E-02 |
|                                                                                     | Simple mode - tophits           | <b>-2.65E-02</b> | 1.50E-02 | 9.37E-02 |
|                                                                                     | Simple mode (NOME) - steiger    | <b>-2.65E-02</b> | 1.45E-02 | 8.24E-02 |
|                                                                                     | Simple mode (NOME) - tophits    | <b>-2.65E-02</b> | 1.51E-02 | 9.44E-02 |
|                                                                                     | Weighted median - steiger       | <b>-2.50E-02</b> | 7.95E-03 | 1.65E-03 |
|                                                                                     | Weighted median - tophits       | <b>-2.50E-02</b> | 8.37E-03 | 2.82E-03 |
|                                                                                     | Weighted mode - steiger         | <b>-2.25E-02</b> | 1.51E-02 | 1.53E-01 |
|                                                                                     | Weighted mode - tophits         | <b>-2.25E-02</b> | 1.55E-02 | 1.65E-01 |
|                                                                                     | Weighted mode (NOME) - steiger  | <b>-2.48E-02</b> | 1.45E-02 | 1.03E-01 |
|                                                                                     | Weighted mode (NOME) - tophits  | <b>-2.48E-02</b> | 1.42E-02 | 9.80E-02 |
| <b><u>Diagnoses - main ICD10: E04 Other non-toxic goitre (-0.000196, 0.240)</u></b> | Egger fixed effects - steiger   | <b>-6.10E-04</b> | 3.67E-04 | 1.13E-01 |
|                                                                                     | Egger fixed effects - tophits   | <b>-6.10E-04</b> | 3.67E-04 | 1.13E-01 |
|                                                                                     | Egger random effects - steiger  | <b>-6.10E-04</b> | 1.67E-03 | 7.19E-01 |
|                                                                                     | Egger random effects - tophits  | <b>-6.10E-04</b> | 1.67E-03 | 7.19E-01 |
|                                                                                     | IVW fixed effects - steiger     | <b>-2.48E-03</b> | 1.39E-04 | 9.45E-14 |
|                                                                                     | IVW fixed effects - tophits     | <b>-2.48E-03</b> | 1.39E-04 | 9.45E-14 |
|                                                                                     | IVW random effects - steiger    | <b>-2.48E-03</b> | 6.49E-04 | 1.06E-03 |
|                                                                                     | IVW random effects - tophits    | <b>-2.48E-03</b> | 6.49E-04 | 1.06E-03 |
|                                                                                     | Penalised median - steiger      | <b>-8.10E-04</b> | 5.70E-04 | 1.56E-01 |
|                                                                                     | Penalised median - tophits      | <b>-8.10E-04</b> | 5.81E-04 | 1.64E-01 |
|                                                                                     | Rucker mean (JK) - steiger      | <b>-1.09E-03</b> | 1.91E-03 | 5.75E-01 |

|                                                                     |                                 |                  |          |          |
|---------------------------------------------------------------------|---------------------------------|------------------|----------|----------|
|                                                                     | Rucker mean (JK) - tophits      | <b>-9.64E-04</b> | 1.95E-03 | 6.27E-01 |
|                                                                     | Rucker median (JK) - steiger    | <b>-1.01E-03</b> | 2.32E-03 | 6.70E-01 |
|                                                                     | Rucker median (JK) - tophits    | <b>-7.18E-04</b> | 2.26E-03 | 7.54E-01 |
|                                                                     | Rucker point estimate - steiger | <b>-6.10E-04</b> | 1.67E-03 | 7.19E-01 |
|                                                                     | Rucker point estimate - tophits | <b>-6.10E-04</b> | 1.67E-03 | 7.19E-01 |
|                                                                     | Simple median - steiger         | <b>-3.79E-03</b> | 6.37E-04 | 2.74E-09 |
|                                                                     | Simple median - tophits         | <b>-3.79E-03</b> | 6.27E-04 | 1.51E-09 |
|                                                                     | Simple mode - steiger           | <b>-5.36E-03</b> | 1.78E-03 | 6.99E-03 |
|                                                                     | Simple mode - tophits           | <b>-5.36E-03</b> | 1.90E-03 | 1.05E-02 |
|                                                                     | Simple mode (NOME) - steiger    | <b>-5.36E-03</b> | 1.68E-03 | 4.57E-03 |
|                                                                     | Simple mode (NOME) - tophits    | <b>-5.36E-03</b> | 1.54E-03 | 2.41E-03 |
|                                                                     | Weighted median - steiger       | <b>-1.25E-03</b> | 5.82E-04 | 3.22E-02 |
|                                                                     | Weighted median - tophits       | <b>-1.25E-03</b> | 5.93E-04 | 3.56E-02 |
|                                                                     | Weighted mode - steiger         | <b>-6.18E-04</b> | 8.60E-04 | 4.81E-01 |
|                                                                     | Weighted mode - tophits         | <b>-6.18E-04</b> | 8.23E-04 | 4.62E-01 |
|                                                                     | Weighted mode (NOME) - steiger  | <b>-6.59E-04</b> | 1.11E-03 | 5.59E-01 |
|                                                                     | Weighted mode (NOME) - tophits  | <b>-6.59E-04</b> | 1.08E-03 | 5.47E-01 |
| Diagnoses - main ICD10: I26 Pulmonary embolism<br>(0.000359, 0.112) | Egger fixed effects - steiger   | <b>-3.18E-03</b> | 4.50E-04 | 1.01E-06 |
|                                                                     | Egger fixed effects - tophits   | <b>-3.18E-03</b> | 4.50E-04 | 1.01E-06 |
|                                                                     | Egger random effects - steiger  | <b>-3.18E-03</b> | 2.23E-03 | 1.69E-01 |
|                                                                     | Egger random effects - tophits  | <b>-3.18E-03</b> | 2.23E-03 | 1.69E-01 |
|                                                                     | IVW fixed effects - steiger     | <b>2.49E-04</b>  | 1.66E-04 | 1.49E-01 |
|                                                                     | IVW fixed effects - tophits     | <b>2.49E-04</b>  | 1.66E-04 | 1.49E-01 |
|                                                                     | IVW random effects - steiger    | <b>2.49E-04</b>  | 8.91E-04 | 7.83E-01 |
|                                                                     | IVW random effects - tophits    | <b>2.49E-04</b>  | 8.91E-04 | 7.83E-01 |
|                                                                     | Penalised median - steiger      | <b>-4.10E-04</b> | 5.42E-04 | 4.49E-01 |
|                                                                     | Penalised median - tophits      | <b>-4.10E-04</b> | 5.36E-04 | 4.44E-01 |
|                                                                     | Rucker mean (JK) - steiger      | <b>-2.82E-03</b> | 2.48E-03 | 2.70E-01 |
|                                                                     | Rucker mean (JK) - tophits      | <b>-2.69E-03</b> | 2.29E-03 | 2.54E-01 |
|                                                                     | Rucker median (JK) - steiger    | <b>-2.83E-03</b> | 3.41E-03 | 4.17E-01 |

|                                                                                 |                                 |                  |          |          |
|---------------------------------------------------------------------------------|---------------------------------|------------------|----------|----------|
|                                                                                 | Rucker median (JK) - tophits    | <b>-2.90E-03</b> | 3.31E-03 | 3.90E-01 |
|                                                                                 | Rucker point estimate - steiger | <b>-3.18E-03</b> | 2.23E-03 | 1.69E-01 |
|                                                                                 | Rucker point estimate - tophits | <b>-3.18E-03</b> | 2.23E-03 | 1.69E-01 |
|                                                                                 | Simple median - steiger         | <b>-3.24E-04</b> | 5.83E-04 | 5.78E-01 |
|                                                                                 | Simple median - tophits         | <b>-3.24E-04</b> | 5.66E-04 | 5.67E-01 |
|                                                                                 | Simple mode - steiger           | <b>-9.89E-04</b> | 7.79E-04 | 2.19E-01 |
|                                                                                 | Simple mode - tophits           | <b>-9.89E-04</b> | 8.71E-04 | 2.70E-01 |
|                                                                                 | Simple mode (NOME) - steiger    | <b>-9.89E-04</b> | 8.63E-04 | 2.65E-01 |
|                                                                                 | Simple mode (NOME) - tophits    | <b>-9.89E-04</b> | 8.98E-04 | 2.84E-01 |
|                                                                                 | Weighted median - steiger       | <b>-3.98E-04</b> | 5.31E-04 | 4.54E-01 |
|                                                                                 | Weighted median - tophits       | <b>-3.98E-04</b> | 5.27E-04 | 4.50E-01 |
|                                                                                 | Weighted mode - steiger         | <b>-6.61E-04</b> | 6.47E-04 | 3.19E-01 |
|                                                                                 | Weighted mode - tophits         | <b>-6.61E-04</b> | 7.07E-04 | 3.61E-01 |
|                                                                                 | Weighted mode (NOME) - steiger  | <b>-7.27E-04</b> | 6.63E-04 | 2.86E-01 |
|                                                                                 | Weighted mode (NOME) - tophits  | <b>-7.27E-04</b> | 6.64E-04 | 2.87E-01 |
| Diagnoses - main ICD10: I80 Phlebitis and thrombophlebitis<br>(0.000395, 0.185) | Egger fixed effects - steiger   | <b>-3.44E-03</b> | 4.22E-04 | 5.94E-08 |
|                                                                                 | Egger fixed effects - tophits   | <b>-3.44E-03</b> | 4.22E-04 | 5.94E-08 |
|                                                                                 | Egger random effects - steiger  | <b>-3.44E-03</b> | 3.05E-03 | 2.72E-01 |
|                                                                                 | Egger random effects - tophits  | <b>-3.44E-03</b> | 3.05E-03 | 2.72E-01 |
|                                                                                 | IVW fixed effects - steiger     | <b>4.22E-04</b>  | 1.57E-04 | 1.35E-02 |
|                                                                                 | IVW fixed effects - tophits     | <b>4.22E-04</b>  | 1.57E-04 | 1.35E-02 |
|                                                                                 | IVW random effects - steiger    | <b>4.22E-04</b>  | 1.18E-03 | 7.24E-01 |
|                                                                                 | IVW random effects - tophits    | <b>4.22E-04</b>  | 1.18E-03 | 7.24E-01 |
|                                                                                 | Penalised median - steiger      | <b>-3.47E-04</b> | 6.57E-04 | 5.97E-01 |
|                                                                                 | Penalised median - tophits      | <b>-3.47E-04</b> | 6.93E-04 | 6.17E-01 |
|                                                                                 | Rucker mean (JK) - steiger      | <b>-3.23E-03</b> | 2.94E-03 | 2.84E-01 |
|                                                                                 | Rucker mean (JK) - tophits      | <b>-3.25E-03</b> | 2.98E-03 | 2.87E-01 |
|                                                                                 | Rucker median (JK) - steiger    | <b>-2.99E-03</b> | 3.59E-03 | 4.13E-01 |
|                                                                                 | Rucker median (JK) - tophits    | <b>-3.14E-03</b> | 3.64E-03 | 3.97E-01 |
|                                                                                 | Rucker point estimate - steiger | <b>-3.44E-03</b> | 3.05E-03 | 2.72E-01 |

|                                                                                |                                 |                         |                 |          |
|--------------------------------------------------------------------------------|---------------------------------|-------------------------|-----------------|----------|
|                                                                                | Rucker point estimate - tophits | <b>-3.44E-03</b>        | 3.05E-03        | 2.72E-01 |
|                                                                                | Simple median - steiger         | <b>-1.05E-04</b>        | 7.45E-04        | 8.87E-01 |
|                                                                                | Simple median - tophits         | <b>-1.05E-04</b>        | 6.87E-04        | 8.78E-01 |
|                                                                                | Simple mode - steiger           | <b>-6.30E-04</b>        | 1.24E-03        | 6.16E-01 |
|                                                                                | Simple mode - tophits           | <b>-6.30E-04</b>        | 1.16E-03        | 5.94E-01 |
|                                                                                | Simple mode (NOME) - steiger    | <b>-6.30E-04</b>        | 1.17E-03        | 5.97E-01 |
|                                                                                | Simple mode (NOME) - tophits    | <b>-6.30E-04</b>        | 1.13E-03        | 5.82E-01 |
|                                                                                | Weighted median - steiger       | <b>-3.65E-04</b>        | 6.87E-04        | 5.95E-01 |
|                                                                                | Weighted median - tophits       | <b>-3.65E-04</b>        | 6.47E-04        | 5.73E-01 |
|                                                                                | Weighted mode - steiger         | <b>-5.33E-04</b>        | 8.67E-04        | 5.45E-01 |
|                                                                                | Weighted mode - tophits         | <b>-5.33E-04</b>        | 8.47E-04        | 5.35E-01 |
|                                                                                | Weighted mode (NOME) - steiger  | <b>-5.33E-04</b>        | 9.30E-04        | 5.72E-01 |
|                                                                                | Weighted mode (NOME) - tophits  | <b>-5.33E-04</b>        | 9.00E-04        | 5.60E-01 |
| <b><u>Diagnoses - main ICD10: N97 Female infertility (0.000020, 0.772)</u></b> | Egger fixed effects - steiger   | <b>1.20E-03</b>         | 8.02E-04        | 1.50E-01 |
|                                                                                | Egger fixed effects - tophits   | <b>1.20E-03</b>         | 8.02E-04        | 1.50E-01 |
|                                                                                | Egger random effects - steiger  | <b>1.20E-03</b>         | 6.00E-04        | 5.95E-02 |
|                                                                                | Egger random effects - tophits  | <b>1.20E-03</b>         | 6.00E-04        | 5.95E-02 |
|                                                                                | IVW fixed effects - steiger     | <b>1.39E-03</b>         | 3.15E-04        | 2.66E-04 |
|                                                                                | IVW fixed effects - tophits     | <b>1.39E-03</b>         | 3.15E-04        | 2.66E-04 |
|                                                                                | IVW random effects - steiger    | <b>1.39E-03</b>         | 2.25E-04        | 4.91E-06 |
|                                                                                | IVW random effects - tophits    | <b>1.39E-03</b>         | 2.25E-04        | 4.91E-06 |
|                                                                                | Penalised median - steiger      | <b>1.57E-03</b>         | 3.82E-04        | 3.75E-05 |
|                                                                                | Penalised median - tophits      | <b>1.57E-03</b>         | 3.89E-04        | 5.25E-05 |
|                                                                                | Rucker mean (JK) - steiger      | <b>1.40E-03</b>         | 2.47E-04        | 1.52E-05 |
|                                                                                | Rucker mean (JK) - tophits      | <b>1.40E-03</b>         | 2.49E-04        | 1.66E-05 |
|                                                                                | Rucker median (JK) - steiger    | <b>1.39E-03</b>         | 2.56E-04        | 2.52E-05 |
|                                                                                | Rucker median (JK) - tophits    | <b>1.40E-03</b>         | 2.46E-04        | 1.41E-05 |
|                                                                                | Rucker point estimate - steiger | <b>1.39E-03</b>         | 3.15E-04        | 2.66E-04 |
|                                                                                | Rucker point estimate - tophits | <b>1.39E-03</b>         | 3.15E-04        | 2.66E-04 |
|                                                                                |                                 | Simple median - steiger | <b>1.69E-03</b> | 4.03E-04 |

|                                                   |                                 |           |          |          |
|---------------------------------------------------|---------------------------------|-----------|----------|----------|
|                                                   | Simple median - tophits         | 1.69E-03  | 4.03E-04 | 2.85E-05 |
|                                                   | Simple mode - steiger           | 1.90E-03  | 6.42E-04 | 7.83E-03 |
|                                                   | Simple mode - tophits           | 1.90E-03  | 6.98E-04 | 1.33E-02 |
|                                                   | Simple mode (NOME) - steiger    | 1.90E-03  | 6.60E-04 | 9.35E-03 |
|                                                   | Simple mode (NOME) - tophits    | 1.90E-03  | 6.62E-04 | 9.60E-03 |
|                                                   | Weighted median - steiger       | 1.53E-03  | 3.81E-04 | 6.12E-05 |
|                                                   | Weighted median - tophits       | 1.53E-03  | 3.85E-04 | 7.34E-05 |
|                                                   | Weighted mode - steiger         | 1.84E-03  | 6.62E-04 | 1.14E-02 |
|                                                   | Weighted mode - tophits         | 1.84E-03  | 7.04E-04 | 1.64E-02 |
|                                                   | Weighted mode (NOME) - steiger  | 1.86E-03  | 6.40E-04 | 8.69E-03 |
|                                                   | Weighted mode (NOME) - tophits  | 1.86E-03  | 6.68E-04 | 1.14E-02 |
| <b><u>Hearing aid user (-0.000145, 0.749)</u></b> | Egger fixed effects - steiger   | -3.73E-03 | 6.23E-03 | 5.56E-01 |
|                                                   | Egger fixed effects - tophits   | -3.73E-03 | 6.23E-03 | 5.56E-01 |
|                                                   | Egger random effects - steiger  | -3.73E-03 | 3.61E-03 | 3.14E-01 |
|                                                   | Egger random effects - tophits  | -3.73E-03 | 3.61E-03 | 3.14E-01 |
|                                                   | IVW fixed effects - steiger     | -5.15E-03 | 2.48E-03 | 5.13E-02 |
|                                                   | IVW fixed effects - tophits     | -5.15E-03 | 2.48E-03 | 5.13E-02 |
|                                                   | IVW random effects - steiger    | -5.15E-03 | 1.38E-03 | 1.31E-03 |
|                                                   | IVW random effects - tophits    | -5.15E-03 | 1.38E-03 | 1.31E-03 |
|                                                   | Penalised median - steiger      | -4.34E-03 | 2.41E-03 | 7.11E-02 |
|                                                   | Penalised median - tophits      | -4.34E-03 | 2.46E-03 | 7.75E-02 |
|                                                   | Rucker mean (JK) - steiger      | -5.19E-03 | 1.14E-03 | 2.03E-04 |
|                                                   | Rucker mean (JK) - tophits      | -5.16E-03 | 1.09E-03 | 1.32E-04 |
|                                                   | Rucker median (JK) - steiger    | -5.16E-03 | 1.07E-03 | 1.04E-04 |
|                                                   | Rucker median (JK) - tophits    | -5.12E-03 | 1.03E-03 | 7.10E-05 |
|                                                   | Rucker point estimate - steiger | -5.15E-03 | 2.48E-03 | 5.13E-02 |
|                                                   | Rucker point estimate - tophits | -5.15E-03 | 2.48E-03 | 5.13E-02 |
|                                                   | Simple median - steiger         | -4.67E-03 | 2.63E-03 | 7.54E-02 |
|                                                   | Simple median - tophits         | -4.67E-03 | 2.51E-03 | 6.25E-02 |
|                                                   | Simple mode - steiger           | -4.74E-03 | 3.64E-03 | 2.08E-01 |



|                                                    |                                 |           |          |          |
|----------------------------------------------------|---------------------------------|-----------|----------|----------|
|                                                    | Simple mode - tophits           | -4.74E-03 | 3.74E-03 | 2.19E-01 |
|                                                    | Simple mode (NOME) - steiger    | -4.74E-03 | 3.46E-03 | 1.86E-01 |
|                                                    | Simple mode (NOME) - tophits    | -4.74E-03 | 3.89E-03 | 2.37E-01 |
|                                                    | Weighted median - steiger       | -4.34E-03 | 2.40E-03 | 7.07E-02 |
|                                                    | Weighted median - tophits       | -4.34E-03 | 2.42E-03 | 7.30E-02 |
|                                                    | Weighted mode - steiger         | -4.65E-03 | 3.03E-03 | 1.41E-01 |
|                                                    | Weighted mode - tophits         | -4.65E-03 | 3.07E-03 | 1.45E-01 |
|                                                    | Weighted mode (NOME) - steiger  | -4.65E-03 | 3.03E-03 | 1.41E-01 |
|                                                    | Weighted mode (NOME) - tophits  | -4.65E-03 | 3.07E-03 | 1.46E-01 |
| <b><u>Hip circumference (-0.001832, 0.514)</u></b> | Egger fixed effects - steiger   | -4.63E-03 | 9.66E-03 | 6.38E-01 |
|                                                    | Egger fixed effects - tophits   | -4.63E-03 | 9.66E-03 | 6.38E-01 |
|                                                    | Egger random effects - steiger  | -4.63E-03 | 2.88E-02 | 8.74E-01 |
|                                                    | Egger random effects - tophits  | -4.63E-03 | 2.88E-02 | 8.74E-01 |
|                                                    | IVW fixed effects - steiger     | -2.23E-02 | 3.87E-03 | 1.51E-05 |
|                                                    | IVW fixed effects - tophits     | -2.23E-02 | 3.87E-03 | 1.51E-05 |
|                                                    | IVW random effects - steiger    | -2.23E-02 | 1.12E-02 | 6.13E-02 |
|                                                    | IVW random effects - tophits    | -2.23E-02 | 1.12E-02 | 6.13E-02 |
|                                                    | Penalised median - steiger      | -3.22E-02 | 1.02E-02 | 1.61E-03 |
|                                                    | Penalised median - tophits      | -3.22E-02 | 9.75E-03 | 9.49E-04 |
|                                                    | Rucker mean (JK) - steiger      | -6.31E-03 | 2.80E-02 | 8.24E-01 |
|                                                    | Rucker mean (JK) - tophits      | -6.47E-03 | 2.76E-02 | 8.17E-01 |
|                                                    | Rucker median (JK) - steiger    | -1.57E-02 | 1.94E-02 | 4.30E-01 |
|                                                    | Rucker median (JK) - tophits    | -1.64E-02 | 1.72E-02 | 3.51E-01 |
|                                                    | Rucker point estimate - steiger | -2.23E-02 | 1.12E-02 | 6.13E-02 |
|                                                    | Rucker point estimate - tophits | -2.23E-02 | 1.12E-02 | 6.13E-02 |
|                                                    | Simple median - steiger         | -2.76E-02 | 1.08E-02 | 1.08E-02 |
|                                                    | Simple median - tophits         | -2.76E-02 | 1.02E-02 | 6.79E-03 |
|                                                    | Simple mode - steiger           | -3.11E-02 | 1.70E-02 | 8.26E-02 |
|                                                    | Simple mode - tophits           | -3.11E-02 | 1.73E-02 | 8.80E-02 |
| Simple mode (NOME) - steiger                       | -3.11E-02                       | 1.62E-02  | 6.95E-02 |          |

|                                                         |                                 |                  |          |          |
|---------------------------------------------------------|---------------------------------|------------------|----------|----------|
|                                                         | Simple mode (NOME) - tophits    | <b>-3.11E-02</b> | 1.63E-02 | 7.24E-02 |
|                                                         | Weighted median - steiger       | <b>-3.14E-02</b> | 9.75E-03 | 1.26E-03 |
|                                                         | Weighted median - tophits       | <b>-3.14E-02</b> | 9.88E-03 | 1.46E-03 |
|                                                         | Weighted mode - steiger         | <b>-3.02E-02</b> | 1.16E-02 | 1.75E-02 |
|                                                         | Weighted mode - tophits         | <b>-3.02E-02</b> | 1.17E-02 | 1.86E-02 |
|                                                         | Weighted mode (NOME) - steiger  | <b>-3.02E-02</b> | 1.13E-02 | 1.54E-02 |
|                                                         | Weighted mode (NOME) - tophits  | <b>-3.02E-02</b> | 1.06E-02 | 1.03E-02 |
| <b><u>Impedance of arm (left) (0.004166, 0.165)</u></b> | Egger fixed effects - steiger   | <b>-6.98E-02</b> | 4.58E-03 | 4.07E-12 |
|                                                         | Egger fixed effects - tophits   | <b>-6.98E-02</b> | 4.58E-03 | 4.07E-12 |
|                                                         | Egger random effects - steiger  | <b>-6.98E-02</b> | 3.03E-02 | 3.28E-02 |
|                                                         | Egger random effects - tophits  | <b>-6.98E-02</b> | 3.03E-02 | 3.28E-02 |
|                                                         | IVW fixed effects - steiger     | <b>-2.94E-02</b> | 1.72E-03 | 2.22E-13 |
|                                                         | IVW fixed effects - tophits     | <b>-2.94E-02</b> | 1.72E-03 | 2.22E-13 |
|                                                         | IVW random effects - steiger    | <b>-2.94E-02</b> | 1.20E-02 | 2.42E-02 |
|                                                         | IVW random effects - tophits    | <b>-2.94E-02</b> | 1.20E-02 | 2.42E-02 |
|                                                         | Penalised median - steiger      | <b>-2.50E-02</b> | 8.14E-03 | 2.17E-03 |
|                                                         | Penalised median - tophits      | <b>-2.50E-02</b> | 7.51E-03 | 8.84E-04 |
|                                                         | Rucker mean (JK) - steiger      | <b>-6.87E-02</b> | 2.89E-02 | 2.74E-02 |
|                                                         | Rucker mean (JK) - tophits      | <b>-6.69E-02</b> | 2.92E-02 | 3.30E-02 |
|                                                         | Rucker median (JK) - steiger    | <b>-6.74E-02</b> | 2.99E-02 | 3.52E-02 |
|                                                         | Rucker median (JK) - tophits    | <b>-6.65E-02</b> | 3.48E-02 | 7.01E-02 |
|                                                         | Rucker point estimate - steiger | <b>-6.98E-02</b> | 3.03E-02 | 3.28E-02 |
|                                                         | Rucker point estimate - tophits | <b>-6.98E-02</b> | 3.03E-02 | 3.28E-02 |
|                                                         | Simple median - steiger         | <b>-2.50E-02</b> | 8.32E-03 | 2.64E-03 |
|                                                         | Simple median - tophits         | <b>-2.50E-02</b> | 8.20E-03 | 2.30E-03 |
|                                                         | Simple mode - steiger           | <b>-2.90E-02</b> | 1.36E-02 | 4.59E-02 |
|                                                         | Simple mode - tophits           | <b>-2.90E-02</b> | 1.35E-02 | 4.36E-02 |
|                                                         | Simple mode (NOME) - steiger    | <b>-2.90E-02</b> | 1.48E-02 | 6.33E-02 |
| Simple mode (NOME) - tophits                            | <b>-2.90E-02</b>                | 1.43E-02         | 5.54E-02 |          |
| Weighted median - steiger                               | <b>-2.51E-02</b>                | 7.84E-03         | 1.36E-03 |          |

|                                                          |                                 |                  |          |          |
|----------------------------------------------------------|---------------------------------|------------------|----------|----------|
|                                                          | Weighted median - tophits       | <b>-2.51E-02</b> | 8.02E-03 | 1.76E-03 |
|                                                          | Weighted mode - steiger         | <b>-3.10E-02</b> | 9.01E-03 | 2.62E-03 |
|                                                          | Weighted mode - tophits         | <b>-3.10E-02</b> | 9.06E-03 | 2.73E-03 |
|                                                          | Weighted mode (NOME) - steiger  | <b>-3.19E-02</b> | 9.62E-03 | 3.41E-03 |
|                                                          | Weighted mode (NOME) - tophits  | <b>-3.19E-02</b> | 9.51E-03 | 3.12E-03 |
| <b><u>Impedance of arm (right) (0.003967, 0.156)</u></b> | Egger fixed effects - steiger   | <b>-6.32E-02</b> | 4.73E-03 | 2.02E-11 |
|                                                          | Egger fixed effects - tophits   | <b>-6.32E-02</b> | 4.73E-03 | 2.02E-11 |
|                                                          | Egger random effects - steiger  | <b>-6.32E-02</b> | 2.89E-02 | 4.07E-02 |
|                                                          | Egger random effects - tophits  | <b>-6.32E-02</b> | 2.89E-02 | 4.07E-02 |
|                                                          | IVW fixed effects - steiger     | <b>-2.40E-02</b> | 1.79E-03 | 9.60E-12 |
|                                                          | IVW fixed effects - tophits     | <b>-2.40E-02</b> | 1.79E-03 | 9.60E-12 |
|                                                          | IVW random effects - steiger    | <b>-2.40E-02</b> | 1.16E-02 | 5.03E-02 |
|                                                          | IVW random effects - tophits    | <b>-2.40E-02</b> | 1.16E-02 | 5.03E-02 |
|                                                          | Penalised median - steiger      | <b>-2.84E-02</b> | 7.85E-03 | 2.99E-04 |
|                                                          | Penalised median - tophits      | <b>-2.84E-02</b> | 7.80E-03 | 2.73E-04 |
|                                                          | Rucker mean (JK) - steiger      | <b>-6.16E-02</b> | 2.73E-02 | 3.52E-02 |
|                                                          | Rucker mean (JK) - tophits      | <b>-5.93E-02</b> | 2.68E-02 | 3.83E-02 |
|                                                          | Rucker median (JK) - steiger    | <b>-6.30E-02</b> | 2.85E-02 | 3.81E-02 |
|                                                          | Rucker median (JK) - tophits    | <b>-6.17E-02</b> | 3.00E-02 | 5.23E-02 |
|                                                          | Rucker point estimate - steiger | <b>-6.32E-02</b> | 2.89E-02 | 4.07E-02 |
|                                                          | Rucker point estimate - tophits | <b>-6.32E-02</b> | 2.89E-02 | 4.07E-02 |
|                                                          | Simple median - steiger         | <b>-2.51E-02</b> | 8.07E-03 | 1.89E-03 |
|                                                          | Simple median - tophits         | <b>-2.51E-02</b> | 8.10E-03 | 1.98E-03 |
|                                                          | Simple mode - steiger           | <b>-1.73E-02</b> | 1.56E-02 | 2.81E-01 |
|                                                          | Simple mode - tophits           | <b>-1.73E-02</b> | 1.51E-02 | 2.64E-01 |
|                                                          | Simple mode (NOME) - steiger    | <b>-1.73E-02</b> | 1.62E-02 | 2.97E-01 |
|                                                          | Simple mode (NOME) - tophits    | <b>-1.73E-02</b> | 1.64E-02 | 3.04E-01 |
|                                                          | Weighted median - steiger       | <b>-2.79E-02</b> | 7.62E-03 | 2.54E-04 |
|                                                          | Weighted median - tophits       | <b>-2.79E-02</b> | 7.71E-03 | 3.00E-04 |
|                                                          | Weighted mode - steiger         | <b>-2.76E-02</b> | 9.46E-03 | 8.28E-03 |

|                                                         |                                 |           |          |          |
|---------------------------------------------------------|---------------------------------|-----------|----------|----------|
|                                                         | Weighted mode - tophits         | -2.76E-02 | 9.41E-03 | 7.96E-03 |
|                                                         | Weighted mode (NOME) - steiger  | -2.85E-02 | 1.02E-02 | 1.06E-02 |
|                                                         | Weighted mode (NOME) - tophits  | -2.85E-02 | 9.49E-03 | 6.71E-03 |
| <b><u>Impedance of whole body (0.003868, 0.077)</u></b> | Egger fixed effects - steiger   | -6.03E-02 | 7.22E-03 | 5.97E-08 |
|                                                         | Egger fixed effects - tophits   | -6.03E-02 | 7.22E-03 | 5.97E-08 |
|                                                         | Egger random effects - steiger  | -6.03E-02 | 2.22E-02 | 1.34E-02 |
|                                                         | Egger random effects - tophits  | -6.03E-02 | 2.22E-02 | 1.34E-02 |
|                                                         | IVW fixed effects - steiger     | -2.21E-02 | 2.66E-03 | 4.43E-08 |
|                                                         | IVW fixed effects - tophits     | -2.21E-02 | 2.66E-03 | 4.43E-08 |
|                                                         | IVW random effects - steiger    | -2.21E-02 | 9.16E-03 | 2.50E-02 |
|                                                         | IVW random effects - tophits    | -2.21E-02 | 9.16E-03 | 2.50E-02 |
|                                                         | Penalised median - steiger      | -2.28E-02 | 8.05E-03 | 4.57E-03 |
|                                                         | Penalised median - tophits      | -2.28E-02 | 7.79E-03 | 3.38E-03 |
|                                                         | Rucker mean (JK) - steiger      | -5.77E-02 | 2.40E-02 | 2.56E-02 |
|                                                         | Rucker mean (JK) - tophits      | -5.77E-02 | 2.42E-02 | 2.64E-02 |
|                                                         | Rucker median (JK) - steiger    | -5.93E-02 | 2.15E-02 | 1.17E-02 |
|                                                         | Rucker median (JK) - tophits    | -5.92E-02 | 2.05E-02 | 8.80E-03 |
|                                                         | Rucker point estimate - steiger | -6.03E-02 | 2.22E-02 | 1.34E-02 |
|                                                         | Rucker point estimate - tophits | -6.03E-02 | 2.22E-02 | 1.34E-02 |
|                                                         | Simple median - steiger         | -2.40E-02 | 8.65E-03 | 5.54E-03 |
|                                                         | Simple median - tophits         | -2.40E-02 | 8.48E-03 | 4.63E-03 |
|                                                         | Simple mode - steiger           | -2.71E-02 | 1.42E-02 | 7.06E-02 |
|                                                         | Simple mode - tophits           | -2.71E-02 | 1.52E-02 | 8.85E-02 |
|                                                         | Simple mode (NOME) - steiger    | -2.71E-02 | 1.51E-02 | 8.68E-02 |
|                                                         | Simple mode (NOME) - tophits    | -2.71E-02 | 1.47E-02 | 8.03E-02 |
|                                                         | Weighted median - steiger       | -2.38E-02 | 8.16E-03 | 3.53E-03 |
|                                                         | Weighted median - tophits       | -2.38E-02 | 8.16E-03 | 3.51E-03 |
|                                                         | Weighted mode - steiger         | -2.57E-02 | 9.53E-03 | 1.37E-02 |
|                                                         | Weighted mode - tophits         | -2.57E-02 | 9.57E-03 | 1.40E-02 |
|                                                         | Weighted mode (NOME) - steiger  | -2.64E-02 | 9.83E-03 | 1.39E-02 |

|                                                                                        |                                 |                  |          |          |
|----------------------------------------------------------------------------------------|---------------------------------|------------------|----------|----------|
|                                                                                        | Weighted mode (NOME) - tophits  | <b>-2.64E-02</b> | 9.13E-03 | 8.80E-03 |
| Non-cancer illness code, self-reported: deep venous thrombosis (dvt) (0.001213, 0.195) | Egger fixed effects - steiger   | <b>-9.46E-03</b> | 7.03E-04 | 1.70E-10 |
|                                                                                        | Egger fixed effects - tophits   | <b>-9.46E-03</b> | 7.03E-04 | 1.70E-10 |
|                                                                                        | Egger random effects - steiger  | <b>-9.46E-03</b> | 9.83E-03 | 3.49E-01 |
|                                                                                        | Egger random effects - tophits  | <b>-9.46E-03</b> | 9.83E-03 | 3.49E-01 |
|                                                                                        | IVW fixed effects - steiger     | <b>2.83E-03</b>  | 2.58E-04 | 2.16E-09 |
|                                                                                        | IVW fixed effects - tophits     | <b>2.83E-03</b>  | 2.58E-04 | 2.16E-09 |
|                                                                                        | IVW random effects - steiger    | <b>2.83E-03</b>  | 3.77E-03 | 4.63E-01 |
|                                                                                        | IVW random effects - tophits    | <b>2.83E-03</b>  | 3.77E-03 | 4.63E-01 |
|                                                                                        | Penalised median - steiger      | <b>-8.68E-05</b> | 1.35E-03 | 9.49E-01 |
|                                                                                        | Penalised median - tophits      | <b>-8.68E-05</b> | 1.43E-03 | 9.52E-01 |
|                                                                                        | Rucker mean (JK) - steiger      | <b>-8.98E-03</b> | 8.99E-03 | 3.31E-01 |
|                                                                                        | Rucker mean (JK) - tophits      | <b>-9.50E-03</b> | 9.11E-03 | 3.11E-01 |
|                                                                                        | Rucker median (JK) - steiger    | <b>-9.10E-03</b> | 1.26E-02 | 4.78E-01 |
|                                                                                        | Rucker median (JK) - tophits    | <b>-9.09E-03</b> | 1.19E-02 | 4.56E-01 |
|                                                                                        | Rucker point estimate - steiger | <b>-9.46E-03</b> | 9.83E-03 | 3.49E-01 |
|                                                                                        | Rucker point estimate - tophits | <b>-9.46E-03</b> | 9.83E-03 | 3.49E-01 |
|                                                                                        | Simple median - steiger         | <b>1.84E-03</b>  | 1.50E-03 | 2.21E-01 |
|                                                                                        | Simple median - tophits         | <b>1.84E-03</b>  | 1.55E-03 | 2.37E-01 |
|                                                                                        | Simple mode - steiger           | <b>2.27E-03</b>  | 2.22E-03 | 3.21E-01 |
|                                                                                        | Simple mode - tophits           | <b>2.27E-03</b>  | 2.15E-03 | 3.04E-01 |
|                                                                                        | Simple mode (NOME) - steiger    | <b>2.27E-03</b>  | 2.12E-03 | 2.98E-01 |
|                                                                                        | Simple mode (NOME) - tophits    | <b>2.27E-03</b>  | 2.08E-03 | 2.90E-01 |
|                                                                                        | Weighted median - steiger       | <b>-6.65E-05</b> | 1.37E-03 | 9.61E-01 |
|                                                                                        | Weighted median - tophits       | <b>-6.65E-05</b> | 1.38E-03 | 9.62E-01 |
|                                                                                        | Weighted mode - steiger         | <b>-7.06E-04</b> | 1.88E-03 | 7.11E-01 |
|                                                                                        | Weighted mode - tophits         | <b>-7.06E-04</b> | 1.88E-03 | 7.11E-01 |
| Weighted mode (NOME) - steiger                                                         | <b>-7.06E-04</b>                | 1.79E-03         | 6.98E-01 |          |
| Weighted mode (NOME) - tophits                                                         | <b>-7.06E-04</b>                | 1.91E-03         | 7.15E-01 |          |
|                                                                                        | Egger fixed effects - steiger   | <b>-1.26E-02</b> | 3.13E-03 | 8.75E-04 |

|                                                                                                                         |                                 |           |          |          |
|-------------------------------------------------------------------------------------------------------------------------|---------------------------------|-----------|----------|----------|
| Non-cancer illness code, self-reported: high cholesterol<br>(0.001806, 0.118)                                           | Egger fixed effects - tophits   | -1.26E-02 | 3.13E-03 | 8.75E-04 |
|                                                                                                                         | Egger random effects - steiger  | -1.26E-02 | 1.20E-02 | 3.08E-01 |
|                                                                                                                         | Egger random effects - tophits  | -1.26E-02 | 1.20E-02 | 3.08E-01 |
|                                                                                                                         | IVW fixed effects - steiger     | 5.72E-03  | 1.12E-03 | 7.48E-05 |
|                                                                                                                         | IVW fixed effects - tophits     | 5.72E-03  | 1.12E-03 | 7.48E-05 |
|                                                                                                                         | IVW random effects - steiger    | 5.72E-03  | 4.71E-03 | 2.40E-01 |
|                                                                                                                         | IVW random effects - tophits    | 5.72E-03  | 4.71E-03 | 2.40E-01 |
|                                                                                                                         | Penalised median - steiger      | 3.90E-03  | 3.62E-03 | 2.82E-01 |
|                                                                                                                         | Penalised median - tophits      | 3.90E-03  | 3.64E-03 | 2.84E-01 |
|                                                                                                                         | Rucker mean (JK) - steiger      | -1.05E-02 | 1.19E-02 | 3.90E-01 |
|                                                                                                                         | Rucker mean (JK) - tophits      | -1.14E-02 | 1.21E-02 | 3.60E-01 |
|                                                                                                                         | Rucker median (JK) - steiger    | -1.16E-02 | 1.30E-02 | 3.86E-01 |
|                                                                                                                         | Rucker median (JK) - tophits    | -1.25E-02 | 1.22E-02 | 3.19E-01 |
|                                                                                                                         | Rucker point estimate - steiger | -1.26E-02 | 1.20E-02 | 3.08E-01 |
|                                                                                                                         | Rucker point estimate - tophits | -1.26E-02 | 1.20E-02 | 3.08E-01 |
|                                                                                                                         | Simple median - steiger         | 4.83E-03  | 4.05E-03 | 2.33E-01 |
|                                                                                                                         | Simple median - tophits         | 4.83E-03  | 3.99E-03 | 2.25E-01 |
|                                                                                                                         | Simple mode - steiger           | 5.49E-03  | 6.47E-03 | 4.07E-01 |
|                                                                                                                         | Simple mode - tophits           | 5.49E-03  | 5.94E-03 | 3.67E-01 |
|                                                                                                                         | Simple mode (NOME) - steiger    | 5.49E-03  | 6.05E-03 | 3.76E-01 |
|                                                                                                                         | Simple mode (NOME) - tophits    | 5.49E-03  | 5.84E-03 | 3.60E-01 |
|                                                                                                                         | Weighted median - steiger       | 3.54E-03  | 3.54E-03 | 3.17E-01 |
|                                                                                                                         | Weighted median - tophits       | 3.54E-03  | 3.78E-03 | 3.49E-01 |
|                                                                                                                         | Weighted mode - steiger         | 4.11E-03  | 4.34E-03 | 3.56E-01 |
| Weighted mode - tophits                                                                                                 | 4.11E-03                        | 4.08E-03  | 3.27E-01 |          |
| Weighted mode (NOME) - steiger                                                                                          | 4.11E-03                        | 4.18E-03  | 3.38E-01 |          |
| Weighted mode (NOME) - tophits                                                                                          | 4.11E-03                        | 4.20E-03  | 3.40E-01 |          |
| <b><u>Non-cancer illness code, self-reported:</u></b><br><b><u>hyperthyroidism/thyrotoxicosis (0.000233, 0.278)</u></b> | Egger fixed effects - steiger   | -6.10E-03 | 1.16E-03 | 6.10E-05 |
|                                                                                                                         | Egger fixed effects - tophits   | -6.10E-03 | 1.16E-03 | 6.10E-05 |
|                                                                                                                         | Egger random effects - steiger  | -6.10E-03 | 2.27E-03 | 1.58E-02 |

|                                                                                                      |                                 |           |          |          |
|------------------------------------------------------------------------------------------------------|---------------------------------|-----------|----------|----------|
|                                                                                                      | Egger random effects - tophits  | -6.10E-03 | 2.27E-03 | 1.58E-02 |
|                                                                                                      | IVW fixed effects - steiger     | -3.74E-03 | 4.30E-04 | 7.49E-08 |
|                                                                                                      | IVW fixed effects - tophits     | -3.74E-03 | 4.30E-04 | 7.49E-08 |
|                                                                                                      | IVW random effects - steiger    | -3.74E-03 | 8.60E-04 | 3.89E-04 |
|                                                                                                      | IVW random effects - tophits    | -3.74E-03 | 8.60E-04 | 3.89E-04 |
|                                                                                                      | Penalised median - steiger      | -3.45E-03 | 9.57E-04 | 3.07E-04 |
|                                                                                                      | Penalised median - tophits      | -3.45E-03 | 9.49E-04 | 2.70E-04 |
|                                                                                                      | Rucker mean (JK) - steiger      | -5.17E-03 | 2.27E-03 | 3.52E-02 |
|                                                                                                      | Rucker mean (JK) - tophits      | -5.08E-03 | 2.19E-03 | 3.24E-02 |
|                                                                                                      | Rucker median (JK) - steiger    | -4.31E-03 | 1.60E-03 | 1.49E-02 |
|                                                                                                      | Rucker median (JK) - tophits    | -4.27E-03 | 1.40E-03 | 6.94E-03 |
|                                                                                                      | Rucker point estimate - steiger | -3.74E-03 | 8.60E-04 | 3.89E-04 |
|                                                                                                      | Rucker point estimate - tophits | -3.74E-03 | 8.60E-04 | 3.89E-04 |
|                                                                                                      | Simple median - steiger         | -3.18E-03 | 1.01E-03 | 1.63E-03 |
|                                                                                                      | Simple median - tophits         | -3.18E-03 | 9.96E-04 | 1.40E-03 |
|                                                                                                      | Simple mode - steiger           | -2.76E-03 | 1.67E-03 | 1.17E-01 |
|                                                                                                      | Simple mode - tophits           | -2.76E-03 | 1.62E-03 | 1.06E-01 |
|                                                                                                      | Simple mode (NOME) - steiger    | -2.76E-03 | 1.65E-03 | 1.12E-01 |
|                                                                                                      | Simple mode (NOME) - tophits    | -2.76E-03 | 1.68E-03 | 1.17E-01 |
|                                                                                                      | Weighted median - steiger       | -3.44E-03 | 9.36E-04 | 2.40E-04 |
|                                                                                                      | Weighted median - tophits       | -3.44E-03 | 9.51E-04 | 3.00E-04 |
|                                                                                                      | Weighted mode - steiger         | -3.26E-03 | 1.26E-03 | 1.86E-02 |
|                                                                                                      | Weighted mode - tophits         | -3.26E-03 | 1.32E-03 | 2.36E-02 |
|                                                                                                      | Weighted mode (NOME) - steiger  | -3.38E-03 | 1.32E-03 | 1.94E-02 |
|                                                                                                      | Weighted mode (NOME) - tophits  | -3.38E-03 | 1.34E-03 | 2.18E-02 |
| <b><u>Non-cancer illness code, self-reported:<br/>hypothyroidism/myxoedema (0.001270, 0.102)</u></b> | Egger fixed effects - steiger   | 6.36E-03  | 1.98E-03 | 5.11E-03 |
|                                                                                                      | Egger fixed effects - tophits   | 6.36E-03  | 1.98E-03 | 5.11E-03 |
|                                                                                                      | Egger random effects - steiger  | 6.36E-03  | 8.04E-03 | 4.40E-01 |
|                                                                                                      | Egger random effects - tophits  | 6.36E-03  | 8.04E-03 | 4.40E-01 |
|                                                                                                      | IVW fixed effects - steiger     | 1.92E-02  | 7.05E-04 | 4.26E-16 |

|                                                                                      |                                 |                  |          |          |
|--------------------------------------------------------------------------------------|---------------------------------|------------------|----------|----------|
|                                                                                      | IVW fixed effects - tophits     | <b>1.92E-02</b>  | 7.05E-04 | 4.26E-16 |
|                                                                                      | IVW random effects - steiger    | <b>1.92E-02</b>  | 3.18E-03 | 1.01E-05 |
|                                                                                      | IVW random effects - tophits    | <b>1.92E-02</b>  | 3.18E-03 | 1.01E-05 |
|                                                                                      | Penalised median - steiger      | <b>1.98E-02</b>  | 2.34E-03 | 2.39E-17 |
|                                                                                      | Penalised median - tophits      | <b>1.98E-02</b>  | 2.57E-03 | 1.18E-14 |
|                                                                                      | Rucker mean (JK) - steiger      | <b>6.94E-03</b>  | 8.97E-03 | 4.49E-01 |
|                                                                                      | Rucker mean (JK) - tophits      | <b>6.79E-03</b>  | 8.81E-03 | 4.51E-01 |
|                                                                                      | Rucker median (JK) - steiger    | <b>7.09E-03</b>  | 9.73E-03 | 4.76E-01 |
|                                                                                      | Rucker median (JK) - tophits    | <b>6.93E-03</b>  | 8.56E-03 | 4.29E-01 |
|                                                                                      | Rucker point estimate - steiger | <b>6.36E-03</b>  | 8.04E-03 | 4.40E-01 |
|                                                                                      | Rucker point estimate - tophits | <b>6.36E-03</b>  | 8.04E-03 | 4.40E-01 |
|                                                                                      | Simple median - steiger         | <b>2.23E-02</b>  | 2.68E-03 | 8.44E-17 |
|                                                                                      | Simple median - tophits         | <b>2.23E-02</b>  | 2.71E-03 | 1.74E-16 |
|                                                                                      | Simple mode - steiger           | <b>2.31E-02</b>  | 3.76E-03 | 8.72E-06 |
|                                                                                      | Simple mode - tophits           | <b>2.31E-02</b>  | 4.14E-03 | 2.77E-05 |
|                                                                                      | Simple mode (NOME) - steiger    | <b>2.31E-02</b>  | 3.61E-03 | 5.11E-06 |
|                                                                                      | Simple mode (NOME) - tophits    | <b>2.31E-02</b>  | 3.62E-03 | 5.36E-06 |
|                                                                                      | Weighted median - steiger       | <b>1.89E-02</b>  | 2.69E-03 | 2.14E-12 |
|                                                                                      | Weighted median - tophits       | <b>1.89E-02</b>  | 2.55E-03 | 1.24E-13 |
|                                                                                      | Weighted mode - steiger         | <b>2.00E-02</b>  | 3.12E-03 | 4.86E-06 |
|                                                                                      | Weighted mode - tophits         | <b>2.00E-02</b>  | 3.15E-03 | 5.43E-06 |
|                                                                                      | Weighted mode (NOME) - steiger  | <b>2.02E-02</b>  | 2.89E-03 | 1.52E-06 |
|                                                                                      | Weighted mode (NOME) - tophits  | <b>2.02E-02</b>  | 2.65E-03 | 4.70E-07 |
| Non-cancer illness code, self-reported: pulmonary embolism +/- dvt (0.000462, 0.287) | Egger fixed effects - steiger   | <b>-3.56E-03</b> | 5.30E-04 | 2.65E-06 |
|                                                                                      | Egger fixed effects - tophits   | <b>-3.56E-03</b> | 5.30E-04 | 2.65E-06 |
|                                                                                      | Egger random effects - steiger  | <b>-3.56E-03</b> | 4.40E-03 | 4.28E-01 |
|                                                                                      | Egger random effects - tophits  | <b>-3.56E-03</b> | 4.40E-03 | 4.28E-01 |
|                                                                                      | IVW fixed effects - steiger     | <b>8.75E-04</b>  | 2.06E-04 | 4.27E-04 |
|                                                                                      | IVW fixed effects - tophits     | <b>8.75E-04</b>  | 2.06E-04 | 4.27E-04 |
|                                                                                      | IVW random effects - steiger    | <b>8.75E-04</b>  | 1.72E-03 | 6.18E-01 |



|                                                                                                       |                                 |           |          |          |
|-------------------------------------------------------------------------------------------------------|---------------------------------|-----------|----------|----------|
|                                                                                                       | IVW random effects - tophits    | 8.75E-04  | 1.72E-03 | 6.18E-01 |
|                                                                                                       | Penalised median - steiger      | 3.89E-04  | 8.41E-04 | 6.44E-01 |
|                                                                                                       | Penalised median - tophits      | 3.89E-04  | 8.47E-04 | 6.46E-01 |
|                                                                                                       | Rucker mean (JK) - steiger      | -3.82E-03 | 3.98E-03 | 3.49E-01 |
|                                                                                                       | Rucker mean (JK) - tophits      | -3.55E-03 | 3.69E-03 | 3.48E-01 |
|                                                                                                       | Rucker median (JK) - steiger    | -3.40E-03 | 4.62E-03 | 4.70E-01 |
|                                                                                                       | Rucker median (JK) - tophits    | -3.22E-03 | 4.30E-03 | 4.63E-01 |
|                                                                                                       | Rucker point estimate - steiger | -3.56E-03 | 4.40E-03 | 4.28E-01 |
|                                                                                                       | Rucker point estimate - tophits | -3.56E-03 | 4.40E-03 | 4.28E-01 |
|                                                                                                       | Simple median - steiger         | -7.99E-05 | 8.71E-04 | 9.27E-01 |
|                                                                                                       | Simple median - tophits         | -7.99E-05 | 8.85E-04 | 9.28E-01 |
|                                                                                                       | Simple mode - steiger           | 1.07E-04  | 1.33E-03 | 9.37E-01 |
|                                                                                                       | Simple mode - tophits           | 1.07E-04  | 1.26E-03 | 9.33E-01 |
|                                                                                                       | Simple mode (NOME) - steiger    | 1.07E-04  | 1.27E-03 | 9.34E-01 |
|                                                                                                       | Simple mode (NOME) - tophits    | 1.07E-04  | 1.25E-03 | 9.33E-01 |
|                                                                                                       | Weighted median - steiger       | 4.01E-04  | 8.95E-04 | 6.55E-01 |
|                                                                                                       | Weighted median - tophits       | 4.01E-04  | 8.38E-04 | 6.33E-01 |
|                                                                                                       | Weighted mode - steiger         | 3.67E-04  | 9.99E-04 | 7.17E-01 |
|                                                                                                       | Weighted mode - tophits         | 3.67E-04  | 9.92E-04 | 7.15E-01 |
|                                                                                                       | Weighted mode (NOME) - steiger  | 3.67E-04  | 9.74E-04 | 7.10E-01 |
|                                                                                                       | Weighted mode (NOME) - tophits  | 3.67E-04  | 9.68E-04 | 7.09E-01 |
| <b><u>Non-cancer illness code, self-reported: thyroid problem (not cancer) (-0.000003, 0.984)</u></b> | Egger fixed effects - steiger   | -1.27E-03 | 5.05E-04 | 2.14E-02 |
|                                                                                                       | Egger fixed effects - tophits   | -1.27E-03 | 5.05E-04 | 2.14E-02 |
|                                                                                                       | Egger random effects - steiger  | -1.27E-03 | 1.47E-03 | 3.97E-01 |
|                                                                                                       | Egger random effects - tophits  | -1.27E-03 | 1.47E-03 | 3.97E-01 |
|                                                                                                       | IVW fixed effects - steiger     | -1.30E-03 | 2.03E-04 | 3.71E-06 |
|                                                                                                       | IVW fixed effects - tophits     | -1.30E-03 | 2.03E-04 | 3.71E-06 |
|                                                                                                       | IVW random effects - steiger    | -1.30E-03 | 5.57E-04 | 3.06E-02 |
|                                                                                                       | IVW random effects - tophits    | -1.30E-03 | 5.57E-04 | 3.06E-02 |
|                                                                                                       | Penalised median - steiger      | -9.14E-04 | 5.11E-04 | 7.36E-02 |

|                                                                |                                 |                  |          |          |
|----------------------------------------------------------------|---------------------------------|------------------|----------|----------|
|                                                                | Penalised median - tophits      | <b>-9.14E-04</b> | 5.22E-04 | 7.99E-02 |
|                                                                | Rucker mean (JK) - steiger      | <b>-1.49E-03</b> | 1.61E-03 | 3.66E-01 |
|                                                                | Rucker mean (JK) - tophits      | <b>-1.54E-03</b> | 1.65E-03 | 3.64E-01 |
|                                                                | Rucker median (JK) - steiger    | <b>-1.27E-03</b> | 7.52E-04 | 1.09E-01 |
|                                                                | Rucker median (JK) - tophits    | <b>-1.31E-03</b> | 7.65E-04 | 1.03E-01 |
|                                                                | Rucker point estimate - steiger | <b>-1.30E-03</b> | 5.57E-04 | 3.06E-02 |
|                                                                | Rucker point estimate - tophits | <b>-1.30E-03</b> | 5.57E-04 | 3.06E-02 |
|                                                                | Simple median - steiger         | <b>-1.10E-03</b> | 5.38E-04 | 4.10E-02 |
|                                                                | Simple median - tophits         | <b>-1.10E-03</b> | 5.36E-04 | 4.04E-02 |
|                                                                | Simple mode - steiger           | <b>-9.23E-04</b> | 7.15E-04 | 2.12E-01 |
|                                                                | Simple mode - tophits           | <b>-9.23E-04</b> | 7.47E-04 | 2.32E-01 |
|                                                                | Simple mode (NOME) - steiger    | <b>-9.23E-04</b> | 7.40E-04 | 2.27E-01 |
|                                                                | Simple mode (NOME) - tophits    | <b>-9.23E-04</b> | 7.46E-04 | 2.31E-01 |
|                                                                | Weighted median - steiger       | <b>-8.85E-04</b> | 4.98E-04 | 7.58E-02 |
|                                                                | Weighted median - tophits       | <b>-8.85E-04</b> | 5.02E-04 | 7.78E-02 |
|                                                                | Weighted mode - steiger         | <b>-8.90E-04</b> | 5.63E-04 | 1.31E-01 |
|                                                                | Weighted mode - tophits         | <b>-8.90E-04</b> | 6.06E-04 | 1.59E-01 |
|                                                                | Weighted mode (NOME) - steiger  | <b>-8.90E-04</b> | 5.83E-04 | 1.44E-01 |
|                                                                | Weighted mode (NOME) - tophits  | <b>-8.90E-04</b> | 5.76E-04 | 1.39E-01 |
| <b><u>Pulse rate, automated reading (-0.002068, 0.470)</u></b> | Egger fixed effects - steiger   | <b>-1.69E-02</b> | 1.03E-02 | 1.17E-01 |
|                                                                | Egger fixed effects - tophits   | <b>-1.69E-02</b> | 1.03E-02 | 1.17E-01 |
|                                                                | Egger random effects - steiger  | <b>-1.69E-02</b> | 2.94E-02 | 5.72E-01 |
|                                                                | Egger random effects - tophits  | <b>-1.69E-02</b> | 2.94E-02 | 5.72E-01 |
|                                                                | IVW fixed effects - steiger     | <b>-3.68E-02</b> | 4.10E-03 | 2.84E-08 |
|                                                                | IVW fixed effects - tophits     | <b>-3.68E-02</b> | 4.10E-03 | 2.84E-08 |
|                                                                | IVW random effects - steiger    | <b>-3.68E-02</b> | 1.14E-02 | 4.51E-03 |
|                                                                | IVW random effects - tophits    | <b>-3.68E-02</b> | 1.14E-02 | 4.51E-03 |
|                                                                | Penalised median - steiger      | <b>-3.19E-02</b> | 9.54E-03 | 8.24E-04 |
|                                                                | Penalised median - tophits      | <b>-3.19E-02</b> | 1.00E-02 | 1.47E-03 |
|                                                                | Rucker mean (JK) - steiger      | <b>-2.22E-02</b> | 2.21E-02 | 3.29E-01 |

|                                                  |                                 |                  |          |          |
|--------------------------------------------------|---------------------------------|------------------|----------|----------|
|                                                  | Rucker mean (JK) - tophits      | <b>-2.12E-02</b> | 2.34E-02 | 3.77E-01 |
|                                                  | Rucker median (JK) - steiger    | <b>-2.96E-02</b> | 1.48E-02 | 6.05E-02 |
|                                                  | Rucker median (JK) - tophits    | <b>-2.98E-02</b> | 1.63E-02 | 8.37E-02 |
|                                                  | Rucker point estimate - steiger | <b>-3.68E-02</b> | 1.14E-02 | 4.51E-03 |
|                                                  | Rucker point estimate - tophits | <b>-3.68E-02</b> | 1.14E-02 | 4.51E-03 |
|                                                  | Simple median - steiger         | <b>-3.53E-02</b> | 1.06E-02 | 8.87E-04 |
|                                                  | Simple median - tophits         | <b>-3.53E-02</b> | 1.03E-02 | 6.27E-04 |
|                                                  | Simple mode - steiger           | <b>-2.80E-02</b> | 1.43E-02 | 6.56E-02 |
|                                                  | Simple mode - tophits           | <b>-2.80E-02</b> | 1.40E-02 | 5.89E-02 |
|                                                  | Simple mode (NOME) - steiger    | <b>-2.80E-02</b> | 1.42E-02 | 6.22E-02 |
|                                                  | Simple mode (NOME) - tophits    | <b>-2.80E-02</b> | 1.45E-02 | 6.88E-02 |
|                                                  | Weighted median - steiger       | <b>-3.18E-02</b> | 9.66E-03 | 9.90E-04 |
|                                                  | Weighted median - tophits       | <b>-3.18E-02</b> | 9.73E-03 | 1.08E-03 |
|                                                  | Weighted mode - steiger         | <b>-2.97E-02</b> | 9.70E-03 | 6.40E-03 |
|                                                  | Weighted mode - tophits         | <b>-2.97E-02</b> | 9.94E-03 | 7.51E-03 |
|                                                  | Weighted mode (NOME) - steiger  | <b>-3.06E-02</b> | 1.00E-02 | 6.59E-03 |
|                                                  | Weighted mode (NOME) - tophits  | <b>-3.06E-02</b> | 1.09E-02 | 1.16E-02 |
| <b><u>Standing height (-0.001012, 0.733)</u></b> | Egger fixed effects - steiger   | <b>-1.29E-02</b> | 4.69E-03 | 1.31E-02 |
|                                                  | Egger fixed effects - tophits   | <b>-1.29E-02</b> | 4.69E-03 | 1.31E-02 |
|                                                  | Egger random effects - steiger  | <b>-1.29E-02</b> | 3.05E-02 | 6.77E-01 |
|                                                  | Egger random effects - tophits  | <b>-1.29E-02</b> | 3.05E-02 | 6.77E-01 |
|                                                  | IVW fixed effects - steiger     | <b>-2.26E-02</b> | 1.89E-03 | 2.76E-10 |
|                                                  | IVW fixed effects - tophits     | <b>-2.26E-02</b> | 1.89E-03 | 2.76E-10 |
|                                                  | IVW random effects - steiger    | <b>-2.26E-02</b> | 1.18E-02 | 6.92E-02 |
|                                                  | IVW random effects - tophits    | <b>-2.26E-02</b> | 1.18E-02 | 6.92E-02 |
|                                                  | Penalised median - steiger      | <b>-2.43E-02</b> | 8.06E-03 | 2.57E-03 |
|                                                  | Penalised median - tophits      | <b>-2.43E-02</b> | 8.03E-03 | 2.48E-03 |
|                                                  | Rucker mean (JK) - steiger      | <b>-9.39E-03</b> | 2.92E-02 | 7.52E-01 |
|                                                  | Rucker mean (JK) - tophits      | <b>-1.07E-02</b> | 3.00E-02 | 7.26E-01 |
|                                                  | Rucker median (JK) - steiger    | <b>-1.53E-02</b> | 2.27E-02 | 5.10E-01 |

|                                                                                                  |                                 |           |          |          |
|--------------------------------------------------------------------------------------------------|---------------------------------|-----------|----------|----------|
|                                                                                                  | Rucker median (JK) - tophits    | -1.65E-02 | 2.29E-02 | 4.79E-01 |
|                                                                                                  | Rucker point estimate - steiger | -2.26E-02 | 1.18E-02 | 6.92E-02 |
|                                                                                                  | Rucker point estimate - tophits | -2.26E-02 | 1.18E-02 | 6.92E-02 |
|                                                                                                  | Simple median - steiger         | -8.41E-03 | 8.57E-03 | 3.27E-01 |
|                                                                                                  | Simple median - tophits         | -8.41E-03 | 8.65E-03 | 3.31E-01 |
|                                                                                                  | Simple mode - steiger           | -7.74E-03 | 1.50E-02 | 6.11E-01 |
|                                                                                                  | Simple mode - tophits           | -7.74E-03 | 1.52E-02 | 6.16E-01 |
|                                                                                                  | Simple mode (NOME) - steiger    | -7.74E-03 | 1.45E-02 | 6.00E-01 |
|                                                                                                  | Simple mode (NOME) - tophits    | -7.74E-03 | 1.51E-02 | 6.13E-01 |
|                                                                                                  | Weighted median - steiger       | -2.31E-02 | 7.80E-03 | 3.04E-03 |
|                                                                                                  | Weighted median - tophits       | -2.31E-02 | 8.21E-03 | 4.88E-03 |
|                                                                                                  | Weighted mode - steiger         | -2.62E-02 | 8.85E-03 | 8.00E-03 |
|                                                                                                  | Weighted mode - tophits         | -2.62E-02 | 9.28E-03 | 1.08E-02 |
|                                                                                                  | Weighted mode (NOME) - steiger  | -2.71E-02 | 9.24E-03 | 8.65E-03 |
|                                                                                                  | Weighted mode (NOME) - tophits  | -2.71E-02 | 9.07E-03 | 7.67E-03 |
| <b><u>Treatment/medication code: levothyroxine sodium</u></b><br><b><u>(0.000347, 0.564)</u></b> | Egger fixed effects - steiger   | 1.32E-02  | 2.04E-03 | 7.56E-06 |
|                                                                                                  | Egger fixed effects - tophits   | 1.32E-02  | 2.04E-03 | 7.56E-06 |
|                                                                                                  | Egger random effects - steiger  | 1.32E-02  | 6.50E-03 | 5.94E-02 |
|                                                                                                  | Egger random effects - tophits  | 1.32E-02  | 6.50E-03 | 5.94E-02 |
|                                                                                                  | IVW fixed effects - steiger     | 1.67E-02  | 8.25E-04 | 2.41E-13 |
|                                                                                                  | IVW fixed effects - tophits     | 1.67E-02  | 8.25E-04 | 2.41E-13 |
|                                                                                                  | IVW random effects - steiger    | 1.67E-02  | 2.53E-03 | 4.51E-06 |
|                                                                                                  | IVW random effects - tophits    | 1.67E-02  | 2.53E-03 | 4.51E-06 |
|                                                                                                  | Penalised median - steiger      | 1.08E-02  | 2.31E-03 | 2.88E-06 |
|                                                                                                  | Penalised median - tophits      | 1.08E-02  | 2.40E-03 | 6.62E-06 |
|                                                                                                  | Rucker mean (JK) - steiger      | 1.27E-02  | 8.43E-03 | 1.49E-01 |
|                                                                                                  | Rucker mean (JK) - tophits      | 1.29E-02  | 8.30E-03 | 1.39E-01 |
|                                                                                                  | Rucker median (JK) - steiger    | 1.51E-02  | 6.08E-03 | 2.41E-02 |
|                                                                                                  | Rucker median (JK) - tophits    | 1.48E-02  | 6.95E-03 | 4.78E-02 |
|                                                                                                  | Rucker point estimate - steiger | 1.67E-02  | 2.53E-03 | 4.51E-06 |

|                                                                               |                                 |                         |                 |          |
|-------------------------------------------------------------------------------|---------------------------------|-------------------------|-----------------|----------|
|                                                                               | Rucker point estimate - tophits | <b>1.67E-02</b>         | 2.53E-03        | 4.51E-06 |
|                                                                               | Simple median - steiger         | <b>1.41E-02</b>         | 2.61E-03        | 6.90E-08 |
|                                                                               | Simple median - tophits         | <b>1.41E-02</b>         | 2.47E-03        | 1.18E-08 |
|                                                                               | Simple mode - steiger           | <b>1.09E-02</b>         | 3.67E-03        | 8.86E-03 |
|                                                                               | Simple mode - tophits           | <b>1.09E-02</b>         | 3.65E-03        | 8.56E-03 |
|                                                                               | Simple mode (NOME) - steiger    | <b>1.09E-02</b>         | 3.84E-03        | 1.17E-02 |
|                                                                               | Simple mode (NOME) - tophits    | <b>1.09E-02</b>         | 3.66E-03        | 8.70E-03 |
|                                                                               | Weighted median - steiger       | <b>1.35E-02</b>         | 2.49E-03        | 5.75E-08 |
|                                                                               | Weighted median - tophits       | <b>1.35E-02</b>         | 2.46E-03        | 4.28E-08 |
|                                                                               | Weighted mode - steiger         | <b>1.07E-02</b>         | 2.97E-03        | 2.23E-03 |
|                                                                               | Weighted mode - tophits         | <b>1.07E-02</b>         | 2.94E-03        | 2.03E-03 |
|                                                                               | Weighted mode (NOME) - steiger  | <b>1.09E-02</b>         | 3.25E-03        | 3.85E-03 |
|                                                                               | Weighted mode (NOME) - tophits  | <b>1.09E-02</b>         | 2.87E-03        | 1.47E-03 |
| <b><u>Treatment/medication code: thyroxine product (-0.000155, 0.604)</u></b> | Egger fixed effects - steiger   | <b>6.24E-03</b>         | 1.21E-03        | 9.69E-05 |
|                                                                               | Egger fixed effects - tophits   | <b>6.24E-03</b>         | 1.21E-03        | 9.69E-05 |
|                                                                               | Egger random effects - steiger  | <b>6.24E-03</b>         | 3.24E-03        | 7.22E-02 |
|                                                                               | Egger random effects - tophits  | <b>6.24E-03</b>         | 3.24E-03        | 7.22E-02 |
|                                                                               | IVW fixed effects - steiger     | <b>4.67E-03</b>         | 4.92E-04        | 3.34E-08 |
|                                                                               | IVW fixed effects - tophits     | <b>4.67E-03</b>         | 4.92E-04        | 3.34E-08 |
|                                                                               | IVW random effects - steiger    | <b>4.67E-03</b>         | 1.26E-03        | 1.77E-03 |
|                                                                               | IVW random effects - tophits    | <b>4.67E-03</b>         | 1.26E-03        | 1.77E-03 |
|                                                                               | Penalised median - steiger      | <b>3.19E-03</b>         | 1.29E-03        | 1.35E-02 |
|                                                                               | Penalised median - tophits      | <b>3.19E-03</b>         | 1.31E-03        | 1.47E-02 |
|                                                                               | Rucker mean (JK) - steiger      | <b>5.27E-03</b>         | 3.40E-03        | 1.40E-01 |
|                                                                               | Rucker mean (JK) - tophits      | <b>5.10E-03</b>         | 3.37E-03        | 1.49E-01 |
|                                                                               | Rucker median (JK) - steiger    | <b>4.82E-03</b>         | 2.28E-03        | 4.95E-02 |
|                                                                               | Rucker median (JK) - tophits    | <b>4.70E-03</b>         | 2.18E-03        | 4.57E-02 |
|                                                                               | Rucker point estimate - steiger | <b>4.67E-03</b>         | 1.26E-03        | 1.77E-03 |
|                                                                               | Rucker point estimate - tophits | <b>4.67E-03</b>         | 1.26E-03        | 1.77E-03 |
|                                                                               |                                 | Simple median - steiger | <b>2.41E-03</b> | 1.30E-03 |

|                                               |                                 |           |          |          |
|-----------------------------------------------|---------------------------------|-----------|----------|----------|
|                                               | Simple median - tophits         | 2.41E-03  | 1.30E-03 | 6.46E-02 |
|                                               | Simple mode - steiger           | 2.55E-04  | 2.45E-03 | 9.18E-01 |
|                                               | Simple mode - tophits           | 2.55E-04  | 2.24E-03 | 9.11E-01 |
|                                               | Simple mode (NOME) - steiger    | 2.55E-04  | 2.21E-03 | 9.09E-01 |
|                                               | Simple mode (NOME) - tophits    | 2.55E-04  | 2.16E-03 | 9.07E-01 |
|                                               | Weighted median - steiger       | 4.53E-03  | 1.28E-03 | 4.04E-04 |
|                                               | Weighted median - tophits       | 4.53E-03  | 1.26E-03 | 3.12E-04 |
|                                               | Weighted mode - steiger         | 4.01E-03  | 2.05E-03 | 6.77E-02 |
|                                               | Weighted mode - tophits         | 4.01E-03  | 2.03E-03 | 6.51E-02 |
|                                               | Weighted mode (NOME) - steiger  | 4.15E-03  | 2.12E-03 | 6.62E-02 |
|                                               | Weighted mode (NOME) - tophits  | 4.15E-03  | 2.10E-03 | 6.48E-02 |
| <u>Trunk fat percentage (0.003114, 0.242)</u> | Egger fixed effects - steiger   | -4.83E-02 | 8.65E-03 | 2.23E-05 |
|                                               | Egger fixed effects - tophits   | -4.83E-02 | 8.65E-03 | 2.23E-05 |
|                                               | Egger random effects - steiger  | -4.83E-02 | 2.72E-02 | 9.17E-02 |
|                                               | Egger random effects - tophits  | -4.83E-02 | 2.72E-02 | 9.17E-02 |
|                                               | IVW fixed effects - steiger     | -1.80E-02 | 3.31E-03 | 2.48E-05 |
|                                               | IVW fixed effects - tophits     | -1.80E-02 | 3.31E-03 | 2.48E-05 |
|                                               | IVW random effects - steiger    | -1.80E-02 | 1.06E-02 | 1.05E-01 |
|                                               | IVW random effects - tophits    | -1.80E-02 | 1.06E-02 | 1.05E-01 |
|                                               | Penalised median - steiger      | -3.14E-02 | 9.17E-03 | 6.07E-04 |
|                                               | Penalised median - tophits      | -3.14E-02 | 9.03E-03 | 5.01E-04 |
|                                               | Rucker mean (JK) - steiger      | -4.03E-02 | 2.80E-02 | 1.67E-01 |
|                                               | Rucker mean (JK) - tophits      | -4.18E-02 | 2.83E-02 | 1.55E-01 |
|                                               | Rucker median (JK) - steiger    | -3.16E-02 | 2.90E-02 | 2.89E-01 |
|                                               | Rucker median (JK) - tophits    | -3.42E-02 | 2.95E-02 | 2.60E-01 |
|                                               | Rucker point estimate - steiger | -4.83E-02 | 2.72E-02 | 9.17E-02 |
|                                               | Rucker point estimate - tophits | -4.83E-02 | 2.72E-02 | 9.17E-02 |
|                                               | Simple median - steiger         | -1.57E-02 | 1.12E-02 | 1.62E-01 |
|                                               | Simple median - tophits         | -1.57E-02 | 1.13E-02 | 1.65E-01 |
|                                               | Simple mode - steiger           | -2.93E-02 | 1.57E-02 | 7.61E-02 |

|                                        |                                 |                  |          |          |
|----------------------------------------|---------------------------------|------------------|----------|----------|
|                                        | Simple mode - tophits           | <b>-2.93E-02</b> | 1.44E-02 | 5.48E-02 |
|                                        | Simple mode (NOME) - steiger    | <b>-2.93E-02</b> | 1.64E-02 | 8.88E-02 |
|                                        | Simple mode (NOME) - tophits    | <b>-2.93E-02</b> | 1.53E-02 | 6.90E-02 |
|                                        | Weighted median - steiger       | <b>-3.13E-02</b> | 9.13E-03 | 6.05E-04 |
|                                        | Weighted median - tophits       | <b>-3.13E-02</b> | 8.87E-03 | 4.17E-04 |
|                                        | Weighted mode - steiger         | <b>-3.98E-02</b> | 1.09E-02 | 1.56E-03 |
|                                        | Weighted mode - tophits         | <b>-3.98E-02</b> | 1.01E-02 | 8.29E-04 |
|                                        | Weighted mode (NOME) - steiger  | <b>-3.98E-02</b> | 9.86E-03 | 6.39E-04 |
|                                        | Weighted mode (NOME) - tophits  | <b>-3.98E-02</b> | 1.08E-02 | 1.47E-03 |
| Trunk fat-free mass (-0.003005, 0.173) | Egger fixed effects - steiger   | <b>3.15E-02</b>  | 4.94E-03 | 4.07E-06 |
|                                        | Egger fixed effects - tophits   | <b>3.15E-02</b>  | 4.94E-03 | 4.07E-06 |
|                                        | Egger random effects - steiger  | <b>3.15E-02</b>  | 2.24E-02 | 1.75E-01 |
|                                        | Egger random effects - tophits  | <b>3.15E-02</b>  | 2.24E-02 | 1.75E-01 |
|                                        | IVW fixed effects - steiger     | <b>2.33E-03</b>  | 1.86E-03 | 2.26E-01 |
|                                        | IVW fixed effects - tophits     | <b>2.33E-03</b>  | 1.86E-03 | 2.26E-01 |
|                                        | IVW random effects - steiger    | <b>2.33E-03</b>  | 8.86E-03 | 7.95E-01 |
|                                        | IVW random effects - tophits    | <b>2.33E-03</b>  | 8.86E-03 | 7.95E-01 |
|                                        | Penalised median - steiger      | <b>-7.18E-03</b> | 6.60E-03 | 2.77E-01 |
|                                        | Penalised median - tophits      | <b>-7.18E-03</b> | 6.37E-03 | 2.59E-01 |
|                                        | Rucker mean (JK) - steiger      | <b>3.21E-02</b>  | 2.44E-02 | 2.04E-01 |
|                                        | Rucker mean (JK) - tophits      | <b>3.21E-02</b>  | 2.50E-02 | 2.13E-01 |
|                                        | Rucker median (JK) - steiger    | <b>3.14E-02</b>  | 2.67E-02 | 2.54E-01 |
|                                        | Rucker median (JK) - tophits    | <b>3.16E-02</b>  | 2.76E-02 | 2.66E-01 |
|                                        | Rucker point estimate - steiger | <b>3.15E-02</b>  | 2.24E-02 | 1.75E-01 |
|                                        | Rucker point estimate - tophits | <b>3.15E-02</b>  | 2.24E-02 | 1.75E-01 |
|                                        | Simple median - steiger         | <b>3.97E-03</b>  | 7.34E-03 | 5.89E-01 |
|                                        | Simple median - tophits         | <b>3.97E-03</b>  | 7.43E-03 | 5.93E-01 |
|                                        | Simple mode - steiger           | <b>-1.72E-04</b> | 1.29E-02 | 9.90E-01 |
|                                        | Simple mode - tophits           | <b>-1.72E-04</b> | 1.31E-02 | 9.90E-01 |
| Simple mode (NOME) - steiger           | <b>-1.72E-04</b>                | 1.32E-02         | 9.90E-01 |          |

|                                         |                                 |                  |          |          |
|-----------------------------------------|---------------------------------|------------------|----------|----------|
|                                         | Simple mode (NOME) - tophits    | <b>-1.72E-04</b> | 1.32E-02 | 9.90E-01 |
|                                         | Weighted median - steiger       | <b>-2.58E-03</b> | 6.80E-03 | 7.05E-01 |
|                                         | Weighted median - tophits       | <b>-2.58E-03</b> | 6.77E-03 | 7.03E-01 |
|                                         | Weighted mode - steiger         | <b>-6.47E-03</b> | 7.42E-03 | 3.94E-01 |
|                                         | Weighted mode - tophits         | <b>-6.47E-03</b> | 7.18E-03 | 3.78E-01 |
|                                         | Weighted mode (NOME) - steiger  | <b>-6.47E-03</b> | 8.11E-03 | 4.35E-01 |
|                                         | Weighted mode (NOME) - tophits  | <b>-6.47E-03</b> | 7.03E-03 | 3.69E-01 |
| Trunk predicted mass (-0.003006, 0.170) | Egger fixed effects - steiger   | <b>3.17E-02</b>  | 4.95E-03 | 3.89E-06 |
|                                         | Egger fixed effects - tophits   | <b>3.17E-02</b>  | 4.95E-03 | 3.89E-06 |
|                                         | Egger random effects - steiger  | <b>3.17E-02</b>  | 2.22E-02 | 1.69E-01 |
|                                         | Egger random effects - tophits  | <b>3.17E-02</b>  | 2.22E-02 | 1.69E-01 |
|                                         | IVW fixed effects - steiger     | <b>2.50E-03</b>  | 1.87E-03 | 1.95E-01 |
|                                         | IVW fixed effects - tophits     | <b>2.50E-03</b>  | 1.87E-03 | 1.95E-01 |
|                                         | IVW random effects - steiger    | <b>2.50E-03</b>  | 8.79E-03 | 7.79E-01 |
|                                         | IVW random effects - tophits    | <b>2.50E-03</b>  | 8.79E-03 | 7.79E-01 |
|                                         | Penalised median - steiger      | <b>-6.11E-03</b> | 6.52E-03 | 3.49E-01 |
|                                         | Penalised median - tophits      | <b>-6.11E-03</b> | 6.62E-03 | 3.56E-01 |
|                                         | Rucker mean (JK) - steiger      | <b>3.14E-02</b>  | 2.39E-02 | 2.03E-01 |
|                                         | Rucker mean (JK) - tophits      | <b>3.27E-02</b>  | 2.48E-02 | 2.02E-01 |
|                                         | Rucker median (JK) - steiger    | <b>3.20E-02</b>  | 2.59E-02 | 2.30E-01 |
|                                         | Rucker median (JK) - tophits    | <b>3.17E-02</b>  | 2.72E-02 | 2.58E-01 |
|                                         | Rucker point estimate - steiger | <b>3.17E-02</b>  | 2.22E-02 | 1.69E-01 |
|                                         | Rucker point estimate - tophits | <b>3.17E-02</b>  | 2.22E-02 | 1.69E-01 |
|                                         | Simple median - steiger         | <b>6.77E-03</b>  | 7.58E-03 | 3.72E-01 |
|                                         | Simple median - tophits         | <b>6.77E-03</b>  | 7.53E-03 | 3.69E-01 |
|                                         | Simple mode - steiger           | <b>1.96E-03</b>  | 1.24E-02 | 8.76E-01 |
|                                         | Simple mode - tophits           | <b>1.96E-03</b>  | 1.22E-02 | 8.74E-01 |
| Simple mode (NOME) - steiger            | <b>1.96E-03</b>                 | 1.35E-02         | 8.86E-01 |          |
| Simple mode (NOME) - tophits            | <b>1.96E-03</b>                 | 1.35E-02         | 8.86E-01 |          |
|                                         | Weighted median - steiger       | <b>-1.72E-03</b> | 6.67E-03 | 7.97E-01 |



|  |                                |                  |          |          |
|--|--------------------------------|------------------|----------|----------|
|  | Weighted median - tophits      | <b>-1.72E-03</b> | 6.88E-03 | 8.03E-01 |
|  | Weighted mode - steiger        | <b>-6.02E-03</b> | 7.34E-03 | 4.22E-01 |
|  | Weighted mode - tophits        | <b>-6.02E-03</b> | 7.53E-03 | 4.34E-01 |
|  | Weighted mode (NOME) - steiger | <b>-6.02E-03</b> | 8.54E-03 | 4.89E-01 |
|  | Weighted mode (NOME) - tophits | <b>-6.02E-03</b> | 7.27E-03 | 4.18E-01 |

**Table S6:** Genomic risk loci and independent variants (LD  $r^2 < 0.1$ ) identified in hyperthyroidism GWAS.

| Genomic Risk Locus | rsID       | CHR | BP        | Alleles | P        | Consequence               | SYMBOL           | Region Biotype           |
|--------------------|------------|-----|-----------|---------|----------|---------------------------|------------------|--------------------------|
| 1                  | rs2476601  | 1   | 114377568 | A/G     | 3.15E-14 | missense_variant          | <i>PTPN22</i>    | protein_coding           |
| 2                  | rs3087243  | 2   | 204738919 | A/G     | 3.80E-21 | downstream_gene_variant   | <i>CTLA4</i>     | protein_coding           |
| 3                  | rs34158769 | 6   | 26336572  | A/G     | 4.60E-19 | regulatory_region_variant | -                | promoter_flanking_region |
| 3                  | rs1796518  | 6   | 26388672  | C/T     | 9.38E-09 | intron_variant            | <i>BTN2A2</i>    | protein_coding           |
| 3                  | rs13217620 | 6   | 27653120  | C/T     | 7.75E-27 | intergenic_variant        | -                | -                        |
| 3                  | rs238883   | 6   | 29346226  | A/G     | 1.22E-08 | intron_variant            | <i>OR5V1</i>     | protein_coding           |
| 3                  | rs969931   | 6   | 29494897  | G/T     | 4.30E-13 | upstream_gene_variant     | <i>LINC01015</i> | antisense                |
| 3                  | rs1233396  | 6   | 29546799  | A/G     | 1.78E-36 | intron_variant            | <i>GABBR1</i>    | protein_coding           |
| 3                  | rs29232    | 6   | 29611431  | C/T     | 4.53E-08 | intergenic_variant        | -                | -                        |
| 4                  | rs34859217 | 6   | 33196397  | A/C     | 4.15E-35 | intergenic_variant        | -                | -                        |
| 4                  | rs80031348 | 6   | 33956364  | A/G     | 3.09E-11 | regulatory_region_variant | -                | TF_binding_site          |
| 5                  | rs2160215  | 14  | 81461472  | C/T     | 8.90E-31 | intron_variant            | <i>TSHR</i>      | protein_coding           |

**Table S7:** Genomic risk loci and independent variants (LD  $r^2 < 0.1$ ) identified in hypothyroidism GWAS.

| Genomic Risk Locus | rsID        | CHR | BP        | Alleles | P         | Consequence                                  | Gene              | Region Biotype          |
|--------------------|-------------|-----|-----------|---------|-----------|----------------------------------------------|-------------------|-------------------------|
| 1                  | rs4081335   | 1   | 1140504   | C/T     | 3.55E-08  | intron_variant                               | <i>TNFRSF18</i>   | protein_coding          |
| 2                  | rs12089835  | 1   | 19771438  | C/T     | 8.87E-09  | intron_variant                               | <i>CAPZB</i>      | protein_coding          |
| 2                  | rs6426808   | 1   | 19835415  | A/G     | 3.13E-10  | upstream_gene_variant                        | <i>RNU4-28P</i>   | snRNA                   |
| 3                  | rs17484960  | 1   | 108337108 | A/G     | 5.99E-10  | intron_variant                               | <i>VAV3</i>       | protein_coding          |
| 3                  | rs17020149  | 1   | 108375289 | A/G     | 1.35E-36  | intron_variant                               | <i>VAV3</i>       | protein_coding          |
| 4                  | rs12061333  | 1   | 113860779 | A/C     | 8.68E-14  | intergenic_variant                           | -                 | -                       |
| 4                  | rs72685697  | 1   | 113869057 | C/T     | 2.71E-09  | intergenic_variant                           | -                 | -                       |
| 4                  | rs12128454  | 1   | 113910209 | C/T     | 3.11E-16  | intergenic_variant                           | -                 | -                       |
| 4                  | rs4839324   | 1   | 114071617 | A/G     | 2.30E-09  | intron_variant                               | <i>MAGI3</i>      | protein_coding          |
| 4                  | rs115985944 | 1   | 114154300 | C/T     | 6.22E-17  | intron_variant                               | <i>MAGI3</i>      | protein_coding          |
| 4                  | rs3789599   | 1   | 114323318 | C/T     | 9.58E-10  | intron_variant                               | <i>RSBN1</i>      | protein_coding          |
| 4                  | rs2476601   | 1   | 114377568 | A/G     | 3.49E-124 | missense_variant                             | <i>PTPN22</i>     | protein_coding          |
| 4                  | rs1310183   | 1   | 114439522 | C/T     | 3.49E-18  | intron_variant                               | <i>AP4B1</i>      | protein_coding          |
| 4                  | rs36064592  | 1   | 114462662 | A/G     | 6.87E-19  | downstream_gene_variant                      | <i>HIPK1-AS1</i>  | retained_intron         |
| 4                  | rs139269023 | 1   | 114559407 | A/T     | 6.49E-11  | intron_variant,non_coding_transcript_variant | <i>OLFML3</i>     | processed_transcript    |
| 4                  | rs61819212  | 1   | 114589211 | A/G     | 1.37E-10  | intergenic_variant                           | -                 | -                       |
| 4                  | rs138244061 | 1   | 114610124 | C/T     | 1.38E-10  | intergenic_variant                           | -                 | -                       |
| 5                  | rs926103    | 1   | 156784982 | C/T     | 4.92E-08  | missense_variant                             | <i>SH2D2A</i>     | protein_coding          |
| 6                  | rs12117927  | 1   | 236629134 | A/C     | 8.18E-10  | intron_variant                               | <i>EDARADD</i>    | protein_coding          |
| 7                  | rs11675342  | 2   | 1407628   | C/T     | 1.67E-18  | intron_variant,non_coding_transcript_variant | <i>TPO</i>        | processed_transcript    |
| 8                  | rs1534430   | 2   | 12644736  | C/T     | 3.99E-14  | intron_variant,non_coding_transcript_variant | <i>MIR3681HG</i>  | lincRNA                 |
| 9                  | rs13399762  | 2   | 55880308  | A/G     | 4.25E-09  | intron_variant,NMD_transcript_variant        | <i>PNPT1</i>      | nonsense_mediated_decay |
| 10                 | rs41368446  | 2   | 162998113 | G/T     | 3.82E-09  | downstream_gene_variant                      | <i>GCG</i>        | protein_coding          |
| 10                 | rs2111485   | 2   | 163110536 | A/G     | 7.84E-13  | intergenic_variant                           | -                 | -                       |
| 10                 | rs78456138  | 2   | 163132346 | C/T     | 1.46E-08  | intron_variant                               | <i>IFIH1</i>      | protein_coding          |
| 11                 | rs1155061   | 2   | 191566381 | A/G     | 5.67E-10  | intron_variant,non_coding_transcript_variant | <i>AC006460.1</i> | antisense               |
| 11                 | rs149218447 | 2   | 191963305 | A/G     | 1.09E-08  | intron_variant                               | <i>STAT4</i>      | protein_coding          |

|    |             |   |           |     |          |                                              |                   |                          |
|----|-------------|---|-----------|-----|----------|----------------------------------------------|-------------------|--------------------------|
| 11 | rs7582694   | 2 | 191970120 | C/G | 2.61E-29 | intron_variant                               | <i>STAT4</i>      | protein_coding           |
| 12 | rs2160316   | 2 | 202885167 | C/T | 4.14E-08 | intergenic_variant                           | -                 | -                        |
| 13 | rs11678714  | 2 | 204633514 | A/T | 7.43E-12 | upstream_gene_variant                        | <i>KRT18P39</i>   | processed_pseudogene     |
| 13 | rs11571297  | 2 | 204745003 | C/T | 5.34E-61 | intergenic_variant                           | -                 | -                        |
| 13 | rs79570815  | 2 | 204748650 | A/G | 1.76E-09 | intergenic_variant                           | -                 | -                        |
| 13 | rs77130284  | 2 | 204805211 | C/T | 3.86E-17 | intron_variant                               | <i>ICOS</i>       | protein_coding           |
| 13 | rs11673985  | 2 | 204986334 | C/T | 2.64E-10 | intergenic_variant                           | -                 | -                        |
| 14 | rs7649344   | 3 | 37006396  | C/T | 1.23E-08 | downstream_gene_variant                      | <i>RNU6ATAC4P</i> | snRNA                    |
| 15 | rs11706511  | 3 | 39344438  | A/G | 2.47E-09 | regulatory_region_variant                    | -                 | CTCF_binding_site        |
| 16 | rs13090803  | 3 | 105934953 | G/T | 2.09E-15 | intergenic_variant                           | -                 | -                        |
| 17 | rs1599795   | 3 | 119243855 | A/T | 8.17E-09 | downstream_gene_variant                      | <i>TIMMDC1</i>    | nonsense_mediated_decay  |
| 18 | rs113229608 | 3 | 121743159 | A/C | 1.17E-09 | upstream_gene_variant                        | <i>ILDR1</i>      | protein_coding           |
| 19 | rs9815073   | 3 | 188115682 | A/C | 1.94E-35 | intron_variant                               | <i>LPP</i>        | protein_coding           |
| 20 | rs4276275   | 4 | 10723685  | C/T | 5.84E-11 | intergenic_variant                           | -                 | -                        |
| 21 | rs7441808   | 4 | 26090375  | A/G | 3.53E-10 | intron_variant,non_coding_transcript_variant | <i>LINC02357</i>  | lincRNA                  |
| 22 | rs4444866   | 4 | 40307533  | C/T | 2.85E-08 | regulatory_region_variant                    | -                 | promoter_flanking_region |
| 23 | rs6833591   | 4 | 123546282 | A/G | 6.10E-09 | upstream_gene_variant                        | <i>IL21</i>       | protein_coding           |
| 24 | rs13145888  | 4 | 149634572 | C/T | 2.45E-21 | intergenic_variant                           | -                 | -                        |
| 25 | rs35782497  | 4 | 187001230 | A/G | 5.77E-12 | intron_variant                               | <i>TLR3</i>       | protein_coding           |
| 26 | rs10036386  | 5 | 76543603  | C/T | 1.75E-09 | intron_variant                               | <i>PDE8B</i>      | protein_coding           |
| 27 | rs28157     | 5 | 102595837 | G/T | 4.16E-10 | intron_variant                               | <i>C5orf30</i>    | protein_coding           |
| 28 | rs114378220 | 5 | 110566360 | C/T | 2.58E-08 | intron_variant                               | <i>CAMK4</i>      | protein_coding           |
| 29 | rs244672    | 5 | 133419283 | C/T | 4.84E-09 | upstream_gene_variant                        | <i>AC008608.1</i> | processed_pseudogene     |
| 30 | rs4263621   | 6 | 435471    | A/G | 1.48E-08 | intergenic_variant                           | -                 | -                        |
| 31 | rs72834698  | 6 | 26176517  | A/G | 4.27E-08 | downstream_gene_variant                      | <i>HIST1H2BD</i>  | protein_coding           |
| 31 | rs6939978   | 6 | 26328462  | C/G | 5.81E-12 | regulatory_region_variant                    | -                 | promoter_flanking_region |
| 31 | rs200949    | 6 | 27835435  | A/G | 2.95E-12 | upstream_gene_variant                        | <i>HIST1H1B</i>   | protein_coding           |
| 31 | rs17404424  | 6 | 29275298  | A/G | 4.99E-08 | missense_variant                             | <i>OR14J1</i>     | protein_coding           |
| 31 | rs17184142  | 6 | 29475761  | C/T | 2.52E-11 | intron_variant,non_coding_transcript_variant | <i>AL662860.1</i> | lincRNA                  |
| 31 | rs1233478   | 6 | 29477821  | G/T | 1.57E-15 | intron_variant,non_coding_transcript_variant | <i>AL662860.1</i> | lincRNA                  |

|    |             |   |           |     |          |                                              |                   |                      |
|----|-------------|---|-----------|-----|----------|----------------------------------------------|-------------------|----------------------|
| 31 | rs1233410   | 6 | 29515494  | C/T | 2.37E-15 | upstream_gene_variant                        | <i>OR2I1P</i>     | protein_coding       |
| 31 | rs362520    | 6 | 29558364  | A/G | 4.71E-08 | intron_variant                               | <i>GABBR1</i>     | protein_coding       |
| 31 | rs29232     | 6 | 29611431  | C/T | 8.38E-09 | intergenic_variant                           | -                 | -                    |
| 32 | rs2854027   | 6 | 33180045  | C/T | 7.06E-10 | downstream_gene_variant                      | <i>MIR219A1</i>   | miRNA                |
| 32 | rs213211    | 6 | 33187355  | C/T | 1.94E-20 | downstream_gene_variant                      | <i>ZNF70P1</i>    | processed_pseudogene |
| 32 | rs1704995   | 6 | 33187688  | C/T | 1.03E-31 | downstream_gene_variant                      | <i>ZNF70P1</i>    | processed_pseudogene |
| 32 | rs147497774 | 6 | 33596031  | C/G | 1.30E-08 | intron_variant                               | <i>ITPR3</i>      | protein_coding       |
| 33 | rs9380522   | 6 | 35537964  | C/T | 5.12E-09 | downstream_gene_variant                      | <i>FKBP5</i>      | protein_coding       |
| 34 | rs654537    | 6 | 90990050  | A/G | 2.13E-29 | intron_variant                               | <i>BACH2</i>      | protein_coding       |
| 34 | rs755178    | 6 | 90999463  | A/G | 3.76E-16 | intron_variant                               | <i>BACH2</i>      | protein_coding       |
| 34 | rs911409    | 6 | 91022755  | C/G | 3.70E-08 | downstream_gene_variant                      | <i>MIR4464</i>    | miRNA                |
| 35 | rs761357    | 6 | 135902599 | A/T | 6.81E-10 | intron_variant,non_coding_transcript_variant | <i>LINC00271</i>  | lincRNA              |
| 36 | rs9497965   | 6 | 148521292 | C/T | 5.19E-12 | intergenic_variant                           | -                 | -                    |
| 37 | rs9295378   | 6 | 167334067 | C/G | 1.30E-08 | intron_variant                               | <i>AL159163.1</i> | protein_coding       |
| 37 | rs933243    | 6 | 167403873 | A/C | 3.90E-24 | intron_variant,non_coding_transcript_variant | <i>Z94721.1</i>   | antisense            |
| 38 | rs60600003  | 7 | 37382465  | G/T | 7.19E-09 | intron_variant                               | <i>ELMO1</i>      | protein_coding       |
| 39 | rs221786    | 7 | 100266081 | C/T | 1.53E-09 | intergenic_variant                           | -                 | -                    |
| 40 | rs2921053   | 8 | 8319963   | C/G | 3.34E-19 | upstream_gene_variant                        | <i>AC103957.2</i> | lincRNA              |
| 40 | rs11786541  | 8 | 9789549   | G/T | 9.26E-10 | intergenic_variant                           | -                 | -                    |
| 41 | rs1531576   | 8 | 11338146  | A/G | 2.90E-12 | intron_variant,non_coding_transcript_variant | <i>AF131216.5</i> | lincRNA              |
| 42 | rs6992869   | 8 | 61395832  | C/T | 2.56E-08 | intron_variant,non_coding_transcript_variant | <i>LINC01301</i>  | lincRNA              |
| 43 | rs1032129   | 8 | 119951900 | A/C | 2.67E-08 | intron_variant                               | <i>TNFRSF11B</i>  | protein_coding       |
| 44 | rs2445610   | 8 | 128197088 | A/G | 3.55E-11 | downstream_gene_variant                      | <i>CASC19</i>     | retained_intron      |
| 45 | rs10956412  | 8 | 129162497 | A/C | 5.84E-13 | downstream_gene_variant                      | <i>MIR1208</i>    | miRNA                |
| 46 | rs1561924   | 8 | 129569371 | A/G | 9.68E-10 | downstream_gene_variant                      | <i>LINC00824</i>  | lincRNA              |
| 47 | rs853303    | 8 | 133932818 | A/G | 2.30E-12 | intron_variant                               | <i>TG</i>         | protein_coding       |
| 47 | rs7006080   | 8 | 134214224 | G/T | 1.66E-09 | intron_variant                               | <i>WISP1</i>      | protein_coding       |
| 48 | rs11783023  | 8 | 141639262 | C/T | 1.06E-08 | intron_variant                               | <i>AGO2</i>       | protein_coding       |
| 49 | rs911760    | 9 | 5438435   | A/C | 5.10E-10 | upstream_gene_variant                        | <i>PLGRKT</i>     | protein_coding       |
| 50 | rs2123340   | 9 | 21589041  | A/G | 7.76E-12 | intergenic_variant                           | -                 | -                    |

|    |             |    |           |     |          |                           |                   |                       |
|----|-------------|----|-----------|-----|----------|---------------------------|-------------------|-----------------------|
| 50 | rs13285496  | 9  | 21654957  | C/G | 6.34E-09 | intergenic_variant        | -                 | -                     |
| 51 | rs10817778  | 9  | 100330004 | A/G | 9.94E-13 | intron_variant            | <i>TMOD1</i>      | protein_coding        |
| 51 | rs2805791   | 9  | 100354298 | A/T | 3.62E-12 | intron_variant            | <i>TMOD1</i>      | protein_coding        |
| 51 | rs2808667   | 9  | 100442806 | C/T | 7.64E-11 | intron_variant            | <i>XPA</i>        | protein_coding        |
| 51 | rs12552830  | 9  | 100517724 | C/G | 1.98E-10 | intergenic_variant        | -                 | -                     |
| 51 | rs62573972  | 9  | 100532265 | A/G | 2.46E-11 | intergenic_variant        | -                 | -                     |
| 51 | rs925489    | 9  | 100546600 | C/T | 1.52E-71 | intergenic_variant        | -                 | -                     |
| 51 | rs76293252  | 9  | 100550482 | A/G | 6.63E-11 | intergenic_variant        | -                 | -                     |
| 51 | rs7870125   | 9  | 100650737 | C/G | 2.21E-20 | intergenic_variant        | -                 | -                     |
| 51 | rs7044744   | 9  | 100769276 | A/C | 7.97E-12 | intron_variant            | <i>ANP32B</i>     | protein_coding        |
| 51 | rs7849424   | 9  | 100876668 | C/T | 2.00E-09 | intron_variant            | <i>TRIM14</i>     | protein_coding        |
| 52 | rs11256442  | 10 | 6079344   | C/T | 3.84E-11 | intron_variant            | <i>IL2RA</i>      | protein_coding        |
| 52 | rs7090530   | 10 | 6110875   | A/C | 2.94E-15 | downstream_gene_variant   | <i>RPL32P23</i>   | processed_pseudogene  |
| 52 | rs41295121  | 10 | 6129643   | C/T | 2.97E-13 | upstream_gene_variant     | <i>RBM17</i>      | protein_coding        |
| 52 | rs11258303  | 10 | 6405534   | A/C | 5.59E-10 | regulatory_region_variant | -                 | open_chromatin_region |
| 53 | rs71508903  | 10 | 63779871  | C/T | 3.21E-21 | intron_variant            | <i>ARID5B</i>     | protein_coding        |
| 53 | rs74654624  | 10 | 63906102  | C/G | 8.86E-09 | intergenic_variant        | -                 | -                     |
| 53 | rs148672683 | 10 | 63910344  | C/T | 3.53E-08 | intergenic_variant        | -                 | -                     |
| 53 | rs7905731   | 10 | 64018472  | C/T | 2.66E-09 | intron_variant            | <i>RTKN2</i>      | protein_coding        |
| 54 | rs534182    | 10 | 89810979  | C/T | 2.70E-08 | upstream_gene_variant     | <i>MED6P1</i>     | processed_pseudogene  |
| 55 | rs10748781  | 10 | 101283330 | A/C | 5.62E-11 | upstream_gene_variant     | <i>AL513542.1</i> | lincRNA               |
| 56 | rs3850765   | 10 | 124139910 | C/T | 2.76E-09 | intron_variant            | <i>PLEKHA1</i>    | protein_coding        |
| 57 | rs11033031  | 11 | 35244643  | A/C | 2.40E-09 | intron_variant            | <i>CD44</i>       | protein_coding        |
| 57 | rs736374    | 11 | 35266944  | A/G | 2.48E-14 | intergenic_variant        | -                 | -                     |
| 58 | rs4409785   | 11 | 95311422  | C/T | 4.31E-21 | intergenic_variant        | -                 | -                     |
| 59 | rs11052877  | 12 | 9905690   | A/G | 9.31E-27 | 3_prime_UTR_variant       | <i>CD69</i>       | protein_coding        |
| 60 | rs705702    | 12 | 56390636  | A/G | 1.96E-11 | upstream_gene_variant     | <i>SUOX</i>       | protein_coding        |
| 61 | rs12578952  | 12 | 103755097 | A/G | 2.03E-08 | intron_variant            | <i>C12orf42</i>   | protein_coding        |
| 61 | rs12582330  | 12 | 103892941 | G/T | 1.10E-12 | upstream_gene_variant     | <i>C12orf42</i>   | protein_coding        |
| 62 | rs12184466  | 12 | 111281636 | C/T | 3.55E-09 | upstream_gene_variant     | <i>CCDC63</i>     | protein_coding        |

|    |             |    |           |     |          |                                              |                   |                      |
|----|-------------|----|-----------|-----|----------|----------------------------------------------|-------------------|----------------------|
| 62 | rs10082818  | 12 | 111663177 | C/G | 1.14E-09 | intron_variant                               | <i>CUX2</i>       | protein_coding       |
| 62 | rs79065604  | 12 | 111877979 | A/T | 1.03E-10 | intron_variant                               | <i>SH2B3</i>      | protein_coding       |
| 62 | rs3184504   | 12 | 111884608 | C/T | 1.10E-81 | missense_variant                             | <i>SH2B3</i>      | protein_coding       |
| 62 | rs615134    | 12 | 112003695 | A/T | 1.29E-11 | intron_variant                               | <i>ATXN2</i>      | protein_coding       |
| 62 | rs117532831 | 12 | 112037450 | A/G | 2.10E-10 | 5_prime_UTR_variant                          | <i>ATXN2</i>      | protein_coding       |
| 62 | rs6490291   | 12 | 112177775 | A/T | 2.82E-08 | intron_variant                               | <i>ACAD10</i>     | protein_coding       |
| 62 | rs11066320  | 12 | 112906415 | A/G | 4.60E-53 | intron_variant                               | <i>PTPN11</i>     | protein_coding       |
| 62 | rs232935    | 12 | 113115628 | C/T | 4.84E-08 | intron_variant                               | <i>RPH3A</i>      | protein_coding       |
| 62 | rs6489855   | 12 | 113164767 | A/G | 2.55E-09 | intron_variant                               | <i>RPH3A</i>      | protein_coding       |
| 63 | rs7318364   | 13 | 24772892  | C/T | 4.68E-14 | intron_variant                               | <i>SPATA13</i>    | protein_coding       |
| 63 | rs9511151   | 13 | 24786576  | A/G | 3.38E-27 | intron_variant                               | <i>SPATA13</i>    | protein_coding       |
| 64 | rs76428106  | 13 | 28604007  | C/T | 4.25E-30 | intron_variant                               | <i>FLT3</i>       | protein_coding       |
| 65 | rs66749983  | 13 | 43063831  | A/T | 1.39E-10 | downstream_gene_variant                      | <i>LINC02341</i>  | lincRNA              |
| 65 | rs116926994 | 13 | 43077245  | A/G | 4.81E-08 | intergenic_variant                           | -                 | -                    |
| 66 | rs8008961   | 14 | 68752643  | C/T | 5.54E-09 | intron_variant,non_coding_transcript_variant | <i>RAD51B</i>     | processed_transcript |
| 67 | rs1045853   | 14 | 106208086 | A/C | 1.10E-09 | missense_variant                             | <i>IGHG1</i>      | IG_C_gene            |
| 68 | rs8043085   | 15 | 38828140  | G/T | 4.47E-12 | intron_variant                               | <i>RASGRP1</i>    | protein_coding       |
| 69 | rs142997491 | 16 | 50729820  | A/G | 2.81E-10 | upstream_gene_variant                        | <i>NOD2</i>       | protein_coding       |
| 70 | rs13333582  | 16 | 67549547  | C/T | 1.80E-08 | upstream_gene_variant                        | <i>RIPOR1</i>     | protein_coding       |
| 71 | rs8054578   | 16 | 79316815  | A/G | 8.95E-09 | intergenic_variant                           | -                 | -                    |
| 72 | rs35703946  | 16 | 86021505  | A/G | 4.89E-08 | downstream_gene_variant                      | <i>AC092723.1</i> | lincRNA              |
| 73 | rs61759532  | 17 | 7240391   | C/T | 1.26E-11 | intron_variant                               | <i>ACAP1</i>      | protein_coding       |
| 74 | rs1088898   | 17 | 8876505   | G/T | 4.22E-08 | intron_variant,non_coding_transcript_variant | <i>AC002091.1</i> | lincRNA              |
| 75 | rs12325861  | 17 | 40289412  | C/T | 3.08E-12 | intron_variant                               | <i>RAB5C</i>      | protein_coding       |
| 76 | rs62076510  | 17 | 45518583  | G/T | 3.46E-13 | 3_prime_UTR_variant                          | <i>EFCAB13</i>    | protein_coding       |
| 77 | rs28665408  | 18 | 67516846  | A/C | 7.63E-11 | downstream_gene_variant                      | <i>CD226</i>      | protein_coding       |
| 78 | rs10424978  | 19 | 4837557   | A/C | 7.21E-15 | downstream_gene_variant                      | <i>PLIN3</i>      | protein_coding       |
| 79 | rs7248104   | 19 | 7224431   | A/G | 1.14E-09 | intron_variant                               | <i>INSR</i>       | protein_coding       |
| 80 | rs34536443  | 19 | 10463118  | C/G | 6.69E-11 | missense_variant                             | <i>TYK2</i>       | protein_coding       |
| 81 | rs1549142   | 19 | 18383794  | C/T | 3.90E-11 | intron_variant                               | <i>IQCN</i>       | protein_coding       |

|    |            |    |          |     |          |                                              |                   |                      |
|----|------------|----|----------|-----|----------|----------------------------------------------|-------------------|----------------------|
| 82 | rs17272847 | 19 | 49979398 | A/G | 1.61E-08 | splice_region_variant,intron_variant         | <i>FLT3LG</i>     | protein_coding       |
| 82 | rs12980063 | 19 | 50196992 | A/G | 1.74E-10 | intron_variant,non_coding_transcript_variant | <i>CPT1C</i>      | retained_intron      |
| 83 | rs2745803  | 20 | 17859706 | A/G | 9.31E-09 | regulatory_region_variant                    | -                 | CTCF_binding_site    |
| 84 | rs2242830  | 21 | 16801277 | C/G | 6.60E-10 | intron_variant,non_coding_transcript_variant | <i>AJ009632.2</i> | lincRNA              |
| 85 | rs2412973  | 22 | 30529631 | A/C | 9.80E-11 | intron_variant                               | <i>HORMAD2</i>    | protein_coding       |
| 86 | rs229540   | 22 | 37591290 | G/T | 8.83E-22 | intron_variant,non_coding_transcript_variant | <i>C1QTNF6</i>    | processed_transcript |
| 86 | rs6000632  | 22 | 37644115 | C/T | 3.88E-08 | upstream_gene_variant                        | <i>RAC2</i>       | protein_coding       |



**Table S8:** Genetic correlation of hyperthyroidism and hypothyroidism calculated with respect to 1578 phenotypic traits.

| Description                                                                                    | Hyperthyroidism |          | Hypothyroidism |           | Difference |          |
|------------------------------------------------------------------------------------------------|-----------------|----------|----------------|-----------|------------|----------|
|                                                                                                | <i>rg</i>       | <i>p</i> | <i>rg</i>      | <i>p</i>  | <i>z</i>   | <i>p</i> |
| Treatment/medication code: levothyroxine sodium                                                | 0.49            | 5.72E-07 | 1.00           | 4.50E-308 | -5.24      | 1.64E-07 |
| Taking other prescription medications                                                          | 0.16            | 0.015    | 0.49           | 5.09E-52  | -4.38      | 1.18E-05 |
| Types of physical activity in last 4 weeks: Walking for pleasure (not as a means of transport) | 0.18            | 0.014    | -0.12          | 0.003     | 3.57       | 3.61E-04 |
| Mouth/teeth dental problems: Mouth ulcers                                                      | -0.29           | 6.00E-04 | 0.03           | 0.513     | -3.31      | 9.17E-04 |
| Long-standing illness, disability or infirmity                                                 | 0.14            | 0.026    | 0.36           | 8.63E-30  | -3.21      | 0.001    |
| Pulse rate                                                                                     | 0.19            | 0.006    | -0.05          | 0.121     | 3.16       | 0.002    |
| Pulse rate, automated reading                                                                  | 0.11            | 0.024    | -0.06          | 0.015     | 3.10       | 0.002    |
| Diagnoses - main ICD10: R07 Pain in throat and chest                                           | -0.13           | 0.228    | 0.23           | 1.10E-06  | -3.06      | 0.002    |
| Treatment/medication code: thyroxine product                                                   | 0.51            | 0.002    | 1.03           | 2.15E-52  | -2.96      | 0.003    |
| Fed-up feelings                                                                                | -0.06           | 0.417    | 0.18           | 1.66E-05  | -2.92      | 0.004    |
| Illness, injury, bereavement, stress in last 2 years: None of the above                        | 0.06            | 0.488    | -0.21          | 1.42E-07  | 2.89       | 0.004    |
| Non-cancer illness code, self-reported: acne/acne vulgaris                                     | 0.49            | 0.091    | -0.47          | 0.011     | 2.81       | 0.005    |
| Number of self-reported non-cancer illnesses                                                   | 0.17            | 0.008    | 0.36           | 2.53E-36  | -2.78      | 0.005    |
| Mood swings                                                                                    | -0.03           | 0.585    | 0.16           | 2.80E-05  | -2.68      | 0.007    |
| Medication for pain relief, constipation, heartburn: Laxatives (e.g. Dulcolax, Senokot)        | -0.17           | 0.143    | 0.17           | 0.002     | -2.67      | 0.008    |
| Number of depression episodes                                                                  | -0.32           | 0.120    | 0.30           | 0.008     | -2.65      | 0.008    |
| Age at first live birth                                                                        | 0.07            | 0.254    | -0.12          | 0.002     | 2.63       | 0.008    |
| Body fat percentage                                                                            | 0.01            | 0.841    | 0.14           | 3.28E-08  | -2.54      | 0.011    |
| Leg fat percentage (right)                                                                     | 0.00            | 0.970    | 0.13           | 8.15E-07  | -2.53      | 0.011    |
| Age completed full time education                                                              | 0.07            | 0.242    | -0.11          | 0.002     | 2.52       | 0.012    |
| Leg fat percentage (left)                                                                      | 0.01            | 0.904    | 0.14           | 2.68E-07  | -2.49      | 0.013    |
| Diagnoses - main ICD10: R35 Polyuria                                                           | -0.42           | 0.109    | 0.33           | 0.032     | -2.47      | 0.014    |
| Non-cancer illness code, self-reported: urinary tract infection/kidney infection               | -0.39           | 0.051    | 0.15           | 0.088     | -2.47      | 0.014    |
| Sleeplessness / insomnia                                                                       | -0.06           | 0.294    | 0.11           | 0.001     | -2.46      | 0.014    |
| Arm fat percentage (right)                                                                     | 0.01            | 0.737    | 0.14           | 1.81E-07  | -2.44      | 0.015    |
| Leg fat mass (right)                                                                           | 0.01            | 0.794    | 0.14           | 8.55E-07  | -2.43      | 0.015    |

|                                                                                                        |       |       |       |          |       |       |
|--------------------------------------------------------------------------------------------------------|-------|-------|-------|----------|-------|-------|
| Waist circumference                                                                                    | 0.04  | 0.381 | 0.17  | 6.94E-11 | -2.42 | 0.015 |
| Trunk fat percentage                                                                                   | 0.01  | 0.771 | 0.14  | 1.94E-08 | -2.42 | 0.016 |
| Treatment/medication code: tramadol                                                                    | -0.16 | 0.209 | 0.19  | 0.009    | -2.41 | 0.016 |
| Leg fat mass (left)                                                                                    | 0.02  | 0.744 | 0.15  | 4.90E-07 | -2.41 | 0.016 |
| Arm fat percentage (left)                                                                              | 0.01  | 0.770 | 0.14  | 4.23E-07 | -2.40 | 0.016 |
| Whole body fat mass                                                                                    | 0.02  | 0.653 | 0.15  | 9.32E-08 | -2.39 | 0.017 |
| Non-cancer illness code, self-reported: irritable bowel syndrome                                       | -0.20 | 0.248 | 0.27  | 0.004    | -2.39 | 0.017 |
| Body mass index (BMI)                                                                                  | 0.01  | 0.816 | 0.14  | 9.77E-06 | -2.37 | 0.018 |
| Overall health rating                                                                                  | 0.07  | 0.166 | 0.21  | 8.86E-10 | -2.36 | 0.018 |
| Types of physical activity in last 4 weeks: Other exercises (eg: swimming, cycling, keep fit, bowling) | 0.02  | 0.760 | -0.15 | 1.42E-05 | 2.35  | 0.019 |
| Arm fat mass (right)                                                                                   | 0.02  | 0.619 | 0.15  | 5.56E-07 | -2.35 | 0.019 |
| Time spent watching television (TV)                                                                    | -0.05 | 0.345 | 0.09  | 8.00E-04 | -2.35 | 0.019 |
| Frequency of tiredness / lethargy in last 2 weeks                                                      | 0.07  | 0.278 | 0.24  | 1.25E-14 | -2.31 | 0.021 |
| Diagnoses - main ICD10: F10 Mental and behavioural disorders due to use of alcohol                     | -0.57 | 0.049 | 0.15  | 0.205    | -2.30 | 0.022 |
| Alcohol usually taken with meals                                                                       | 0.11  | 0.113 | -0.07 | 0.058    | 2.28  | 0.022 |
| Non-cancer illness code, self-reported: depression                                                     | -0.09 | 0.300 | 0.14  | 0.003    | -2.27 | 0.023 |
| Smoking/smokers in household                                                                           | -0.16 | 0.195 | 0.15  | 0.012    | -2.27 | 0.023 |
| Shortness of breath walking on level ground                                                            | -0.02 | 0.841 | 0.23  | 1.05E-05 | -2.23 | 0.026 |
| Number of treatments/medications taken                                                                 | 0.18  | 0.002 | 0.32  | 1.43E-22 | -2.23 | 0.026 |
| Seen doctor (GP) for nerves, anxiety, tension or depression                                            | 0.01  | 0.896 | 0.15  | 1.24E-07 | -2.21 | 0.027 |
| Neuroticism score                                                                                      | 0.00  | 0.971 | 0.17  | 7.49E-05 | -2.21 | 0.027 |
| Trunk fat mass                                                                                         | 0.03  | 0.516 | 0.14  | 3.00E-08 | -2.20 | 0.028 |
| Arm fat mass (left)                                                                                    | 0.03  | 0.548 | 0.15  | 7.97E-07 | -2.19 | 0.029 |
| Alcohol intake frequency.                                                                              | -0.02 | 0.719 | 0.12  | 8.46E-06 | -2.16 | 0.031 |
| Mouth/teeth dental problems: None of the above                                                         | 0.08  | 0.255 | -0.11 | 0.031    | 2.15  | 0.032 |
| Irritability                                                                                           | -0.05 | 0.533 | 0.14  | 0.004    | -2.13 | 0.033 |
| Treatment/medication code: migril tablet                                                               | -0.56 | 0.039 | 0.09  | 0.520    | -2.13 | 0.034 |
| Mouth/teeth dental problems: Painful gums                                                              | -0.16 | 0.248 | 0.17  | 0.020    | -2.10 | 0.035 |
| Treatment/medication code: fluoxetine                                                                  | -0.20 | 0.268 | 0.22  | 0.015    | -2.10 | 0.036 |

|                                                                            |       |       |       |          |       |       |
|----------------------------------------------------------------------------|-------|-------|-------|----------|-------|-------|
| Diagnoses - main ICD10: I80 Phlebitis and thrombophlebitis                 | 0.43  | 0.003 | 0.07  | 0.427    | 2.09  | 0.037 |
| Treatment/medication code: beclazone 50 inhaler                            | 0.58  | 0.013 | 0.06  | 0.565    | 2.04  | 0.041 |
| Average weekly red wine intake                                             | 0.06  | 0.417 | -0.11 | 0.002    | 2.04  | 0.042 |
| Treatment/medication code: co-codamol                                      | -0.04 | 0.759 | 0.23  | 1.00E-04 | -2.03 | 0.042 |
| Treatment/medication code: mebeverine                                      | -0.25 | 0.275 | 0.31  | 0.042    | -2.03 | 0.043 |
| Non-cancer illness code, self-reported: heart attack/myocardial infarction | -0.07 | 0.483 | 0.15  | 0.004    | -2.02 | 0.044 |
| Diagnoses - main ICD10: I26 Pulmonary embolism                             | -0.47 | 0.044 | 0.05  | 0.659    | -2.01 | 0.044 |
| Treatment/medication code: phenobarbital                                   | -0.42 | 0.063 | 0.08  | 0.445    | -2.00 | 0.045 |
| Sensitivity / hurt feelings                                                | 0.01  | 0.834 | 0.16  | 2.67E-05 | -2.00 | 0.045 |
| Diagnoses - main ICD10: L43 Lichen planus                                  | -0.37 | 0.236 | 0.39  | 0.070    | -2.00 | 0.045 |
| Diagnoses - main ICD10: K58 Irritable bowel syndrome                       | -0.13 | 0.584 | 0.47  | 0.008    | -1.99 | 0.047 |
| Treatment/medication code: indoramin                                       | -0.12 | 0.618 | 0.45  | 0.006    | -1.98 | 0.048 |
| Vascular/heart problems diagnosed by doctor: Heart attack                  | -0.05 | 0.576 | 0.16  | 0.002    | -1.98 | 0.048 |
| Non-cancer illness code, self-reported: prolapsed disc/slipped disc        | -0.16 | 0.312 | 0.19  | 0.020    | -1.98 | 0.048 |
| Falls in the last year                                                     | 0.02  | 0.824 | 0.18  | 1.34E-06 | -1.97 | 0.049 |
| Qualifications: College or University degree                               | 0.01  | 0.840 | -0.10 | 7.29E-05 | 1.97  | 0.049 |
| Types of physical activity in last 4 weeks: None of the above              | 0.03  | 0.768 | 0.22  | 3.58E-06 | -1.97 | 0.049 |
| Duration of heavy DIY                                                      | -0.15 | 0.189 | 0.10  | 0.083    | -1.96 | 0.050 |
| Diagnoses - main ICD10: R10 Abdominal and pelvic pain                      | -0.03 | 0.801 | 0.21  | 2.00E-04 | -1.96 | 0.050 |
| Non-cancer illness code, self-reported: gout                               | -0.06 | 0.554 | 0.16  | 0.004    | -1.95 | 0.051 |
| Treatment/medication code: ezetimibe                                       | 0.51  | 0.007 | 0.10  | 0.236    | 1.94  | 0.052 |
| Diagnoses - main ICD10: K85 Acute pancreatitis                             | -0.16 | 0.333 | 0.20  | 0.022    | -1.94 | 0.052 |
| Frequency of unenthusiasm / disinterest in last 2 weeks                    | 0.01  | 0.865 | 0.18  | 1.57E-05 | -1.92 | 0.055 |
| Treatment/medication code: chondroitin product                             | -0.36 | 0.064 | 0.05  | 0.573    | -1.92 | 0.055 |
| Diagnoses - main ICD10: K29 Gastritis and duodenitis                       | -0.14 | 0.332 | 0.17  | 0.029    | -1.90 | 0.057 |
| Diagnoses - main ICD10: M19 Other arthrosis                                | -0.29 | 0.208 | 0.24  | 0.126    | -1.90 | 0.057 |
| Diagnoses - main ICD10: N32 Other disorders of bladder                     | -0.16 | 0.319 | 0.19  | 0.039    | -1.89 | 0.058 |
| Treatment/medication code: nitrazepam                                      | -0.51 | 0.076 | 0.08  | 0.524    | -1.88 | 0.060 |
| Treatment/medication code: paroxetine                                      | -0.28 | 0.239 | 0.22  | 0.064    | -1.88 | 0.060 |
| Ever unenthusiastic/disinterested for a whole week                         | -0.02 | 0.869 | 0.19  | 1.00E-04 | -1.88 | 0.061 |

|                                                                            |       |       |       |          |       |       |
|----------------------------------------------------------------------------|-------|-------|-------|----------|-------|-------|
| Ever manic/hyper for 2 days                                                | -0.04 | 0.791 | 0.29  | 0.001    | -1.87 | 0.062 |
| Usual walking pace                                                         | 0.01  | 0.830 | -0.10 | 7.00E-04 | 1.86  | 0.062 |
| Average weekly champagne plus white wine intake                            | 0.14  | 0.121 | -0.05 | 0.281    | 1.86  | 0.062 |
| Diagnoses - main ICD10: M72 Fibroblastic disorders                         | 0.14  | 0.275 | -0.13 | 0.066    | 1.86  | 0.063 |
| Qualifications: None of the above                                          | -0.02 | 0.717 | 0.10  | 0.001    | -1.86 | 0.064 |
| Reason for reducing amount of alcohol drunk: Financial reasons             | -0.25 | 0.203 | 0.15  | 0.100    | -1.85 | 0.064 |
| Diagnoses - main ICD10: E04 Other non-toxic goitre                         | 0.16  | 0.320 | -0.20 | 0.073    | 1.84  | 0.066 |
| Exposure to tobacco smoke at home                                          | -0.11 | 0.374 | 0.14  | 0.021    | -1.83 | 0.067 |
| Target heart rate achieved                                                 | 0.22  | 0.164 | -0.10 | 0.231    | 1.79  | 0.073 |
| Leg pain on walking : action taken                                         | 0.17  | 0.297 | -0.16 | 0.063    | 1.79  | 0.073 |
| Illnesses of siblings: Prostate cancer                                     | 0.40  | 0.120 | -0.11 | 0.369    | 1.79  | 0.074 |
| Diagnoses - main ICD10: M54 Dorsalgia                                      | -0.12 | 0.329 | 0.14  | 0.078    | -1.78 | 0.076 |
| Treatment/medication code: allopurinol                                     | -0.06 | 0.565 | 0.14  | 0.011    | -1.77 | 0.076 |
| Non-cancer illness code, self-reported: back problem                       | -0.25 | 0.119 | 0.07  | 0.402    | -1.77 | 0.077 |
| Maternal smoking around birth                                              | -0.06 | 0.412 | 0.08  | 0.023    | -1.77 | 0.078 |
| Guilty feelings                                                            | 0.02  | 0.721 | 0.17  | 8.12E-05 | -1.76 | 0.078 |
| Diagnoses - main ICD10: J47 Bronchiectasis                                 | 0.58  | 0.028 | 0.05  | 0.700    | 1.76  | 0.078 |
| Diagnoses - main ICD10: O04 Medical abortion                               | -1.03 | 0.063 | -0.03 | 0.810    | -1.75 | 0.081 |
| Frequency of travelling from home to job workplace                         | -0.19 | 0.088 | 0.02  | 0.657    | -1.74 | 0.082 |
| Weight                                                                     | 0.04  | 0.413 | 0.13  | 2.18E-06 | -1.74 | 0.082 |
| Diagnoses - main ICD10: M75 Shoulder lesions                               | -0.09 | 0.543 | 0.21  | 0.009    | -1.73 | 0.084 |
| Mineral and other dietary supplements: Selenium                            | 0.32  | 0.040 | 0.00  | 0.989    | 1.73  | 0.084 |
| Hip circumference                                                          | 0.03  | 0.480 | 0.13  | 6.31E-06 | -1.73 | 0.084 |
| Treatment/medication code: ipratropium                                     | 0.68  | 0.050 | 0.00  | 0.983    | 1.72  | 0.085 |
| Why stopped smoking: Illness or ill health                                 | -0.19 | 0.308 | 0.16  | 0.048    | -1.72 | 0.086 |
| Diagnoses - main ICD10: K60 Fissure and fistula of anal and rectal regions | 0.47  | 0.005 | 0.15  | 0.085    | 1.71  | 0.087 |
| Treatment/medication code: diclofenac sodium+misoprostol                   | 0.73  | 0.008 | 0.21  | 0.124    | 1.71  | 0.088 |
| Mineral and other dietary supplements: Fish oil (including cod liver oil)  | 0.10  | 0.225 | -0.07 | 0.204    | 1.71  | 0.088 |
| Diagnoses - main ICD10: M17 Gonarthrosis [arthrosis of knee]               | -0.11 | 0.319 | 0.10  | 0.078    | -1.70 | 0.089 |
| Suffer from 'nerves'                                                       | -0.03 | 0.731 | 0.13  | 0.006    | -1.70 | 0.089 |

|                                                                                            |       |       |       |          |       |       |
|--------------------------------------------------------------------------------------------|-------|-------|-------|----------|-------|-------|
| Ever had prostate specific antigen (PSA) test                                              | 0.11  | 0.298 | -0.09 | 0.085    | 1.69  | 0.091 |
| Drive faster than motorway speed limit                                                     | 0.02  | 0.707 | -0.10 | 0.006    | 1.69  | 0.091 |
| Home area population density - urban or rural: England/Wales - Village - less sparse       | 0.24  | 0.351 | -0.25 | 0.055    | 1.69  | 0.091 |
| Qualifications: A levels/AS levels or equivalent                                           | 0.02  | 0.756 | -0.09 | 0.004    | 1.68  | 0.092 |
| Diagnoses - main ICD10: S83 Dislocation, sprain and strain of joints and ligaments of knee | -0.56 | 0.125 | 0.11  | 0.493    | -1.68 | 0.093 |
| Frequency of depressed mood in last 2 weeks                                                | 0.05  | 0.508 | 0.19  | 2.76E-06 | -1.68 | 0.094 |
| Noisy workplace                                                                            | -0.04 | 0.669 | 0.13  | 0.003    | -1.67 | 0.094 |
| Non-cancer illness code, self-reported: hayfever/allergic rhinitis                         | -0.07 | 0.435 | 0.10  | 0.053    | -1.66 | 0.097 |
| Treatment/medication code: tetralysal 300 capsule                                          | 0.38  | 0.114 | -0.11 | 0.531    | 1.65  | 0.098 |
| Diagnoses - main ICD10: N19 Unspecified renal failure                                      | 0.41  | 0.091 | -0.05 | 0.725    | 1.65  | 0.099 |
| Diagnoses - main ICD10: S56 Injury of muscle and tendon at forearm level                   | -0.36 | 0.316 | 0.42  | 0.174    | -1.65 | 0.099 |
| Diagnoses - main ICD10: K21 Gastro-oesophageal reflux disease                              | 0.27  | 0.104 | -0.03 | 0.684    | 1.65  | 0.100 |
| Treatment/medication code: atorvastatin                                                    | -0.01 | 0.933 | 0.19  | 7.00E-04 | -1.63 | 0.104 |
| Diagnoses - main ICD10: R05 Cough                                                          | -0.25 | 0.317 | 0.21  | 0.124    | -1.63 | 0.104 |
| Forced expiratory volume in 1-second (FEV1), predicted percentage                          | -0.14 | 0.031 | -0.02 | 0.625    | -1.62 | 0.104 |
| Age started oral contraceptive pill                                                        | 0.14  | 0.131 | -0.03 | 0.538    | 1.62  | 0.105 |
| Treatment/medication code: salazopyrin 500mg tablet                                        | 0.56  | 0.026 | 0.10  | 0.434    | 1.62  | 0.106 |
| Treatment/medication code: sumatriptan                                                     | -0.26 | 0.198 | 0.11  | 0.305    | -1.62 | 0.106 |
| Diagnoses - main ICD10: R69 Unknown and unspecified causes of morbidity                    | -0.15 | 0.420 | 0.18  | 0.028    | -1.62 | 0.106 |
| Treatment/medication code: monomax xl 60mg m/r tablet                                      | -0.58 | 0.220 | 0.27  | 0.236    | -1.62 | 0.106 |
| Number of children fathered                                                                | -0.17 | 0.102 | 0.02  | 0.713    | -1.61 | 0.107 |
| Diagnoses - main ICD10: R32 Unspecified urinary incontinence                               | -0.54 | 0.187 | 0.20  | 0.344    | -1.60 | 0.109 |
| Diagnoses - main ICD10: N97 Female infertility                                             | -0.39 | 0.170 | 0.10  | 0.365    | -1.60 | 0.109 |
| Non-cancer illness code, self-reported: retinal detachment                                 | 0.33  | 0.163 | -0.10 | 0.428    | 1.60  | 0.109 |
| Treatment/medication code: senokot 7.5mg tablet                                            | 0.49  | 0.120 | -0.05 | 0.670    | 1.60  | 0.109 |
| Diagnoses - main ICD10: M48 Other spondylopathies                                          | -0.33 | 0.163 | 0.08  | 0.414    | -1.60 | 0.109 |
| Frequency of tenseness / restlessness in last 2 weeks                                      | -0.02 | 0.781 | 0.11  | 0.002    | -1.60 | 0.109 |
| Surgery/amputation of toe or leg: Yes, toes                                                | 0.54  | 0.124 | -0.06 | 0.647    | 1.60  | 0.109 |
| Tobacco smoking: Occasionally                                                              | 0.21  | 0.399 | -0.25 | 0.083    | 1.60  | 0.110 |

|                                                                                                       |       |          |       |          |       |       |
|-------------------------------------------------------------------------------------------------------|-------|----------|-------|----------|-------|-------|
| Ever used hormone-replacement therapy (HRT)                                                           | -0.07 | 0.474    | 0.10  | 0.048    | -1.60 | 0.110 |
| Non-cancer illness code, self-reported: anxiety/panic attacks                                         | -0.18 | 0.292    | 0.12  | 0.122    | -1.60 | 0.110 |
| Duration of walks                                                                                     | -0.13 | 0.093    | 0.00  | 0.898    | -1.60 | 0.110 |
| Age at last live birth                                                                                | 0.06  | 0.401    | -0.09 | 0.123    | 1.59  | 0.111 |
| Qualifications: Other professional qualifications eg: nursing, teaching                               | 0.07  | 0.346    | -0.06 | 0.084    | 1.59  | 0.111 |
| Treatment/medication code: insulin product                                                            | 0.15  | 0.337    | 0.42  | 6.26E-07 | -1.59 | 0.112 |
| Pain type(s) experienced in last month: Facial pain                                                   | -0.02 | 0.902    | 0.25  | 0.005    | -1.59 | 0.113 |
| Treatment/medication code: tibolone                                                                   | 0.50  | 0.268    | -0.33 | 0.213    | 1.59  | 0.113 |
| Qualifications: CSEs or equivalent                                                                    | 0.00  | 0.988    | 0.17  | 1.00E-04 | -1.58 | 0.114 |
| Friendships satisfaction                                                                              | 0.21  | 0.016    | 0.06  | 0.214    | 1.58  | 0.115 |
| Non-cancer illness code, self-reported: nasal polyps                                                  | -0.24 | 0.231    | 0.10  | 0.219    | -1.58 | 0.115 |
| Handedness (chirality/laterality): Left-handed                                                        | 0.02  | 0.902    | -0.20 | 6.00E-04 | 1.57  | 0.116 |
| Ever highly irritable/argumentative for 2 days                                                        | -0.02 | 0.807    | 0.15  | 0.005    | -1.57 | 0.117 |
| Treatment/medication code: travatan 40micrograms/ml eye drops                                         | -0.67 | 0.186    | 0.18  | 0.359    | -1.57 | 0.117 |
| Medication for cholesterol, blood pressure or diabetes: Cholesterol lowering medication               | 0.03  | 0.690    | 0.17  | 3.65E-05 | -1.56 | 0.119 |
| Diagnoses - main ICD10: N05 Unspecified nephritic syndrome                                            | -0.37 | 0.284    | 0.22  | 0.156    | -1.56 | 0.119 |
| Diagnoses - main ICD10: H40 Glaucoma                                                                  | 0.55  | 0.148    | -0.08 | 0.566    | 1.56  | 0.120 |
| Treatment/medication code: movicol oral powder                                                        | -0.31 | 0.322    | 0.25  | 0.165    | -1.55 | 0.121 |
| Sleep duration                                                                                        | 0.04  | 0.466    | -0.07 | 0.094    | 1.55  | 0.122 |
| Other serious medical condition/disability diagnosed by doctor                                        | 0.32  | 8.65E-05 | 0.46  | 7.43E-38 | -1.54 | 0.122 |
| Treatment/medication code: betahistine                                                                | -0.44 | 0.196    | 0.15  | 0.392    | -1.54 | 0.123 |
| Illnesses of father: Severe depression                                                                | -0.21 | 0.158    | 0.04  | 0.536    | -1.54 | 0.123 |
| Diagnoses - main ICD10: K80 Cholelithiasis                                                            | -0.08 | 0.578    | 0.17  | 0.021    | -1.54 | 0.123 |
| Diagnoses - main ICD10: D48 Neoplasm of uncertain or unknown behaviour of other and unspecified sites | 0.18  | 0.439    | -0.23 | 0.079    | 1.54  | 0.125 |
| Cancer code, self-reported: prostate cancer                                                           | 0.25  | 0.116    | -0.02 | 0.793    | 1.54  | 0.125 |
| Non-cancer illness code, self-reported: abdominal hernia                                              | 0.61  | 0.274    | -0.36 | 0.223    | 1.53  | 0.125 |
| Treatment/medication code: tiotropium                                                                 | 0.47  | 0.040    | 0.05  | 0.733    | 1.52  | 0.128 |
| Illness, injury, bereavement, stress in last 2 years: Serious illness, injury or assault to yourself  | 0.11  | 0.345    | 0.30  | 1.99E-08 | -1.52 | 0.129 |
| Diagnoses - main ICD10: I20 Angina pectoris                                                           | 0.08  | 0.571    | 0.31  | 1.33E-05 | -1.52 | 0.129 |

|                                                                                                                       |       |       |       |          |       |       |
|-----------------------------------------------------------------------------------------------------------------------|-------|-------|-------|----------|-------|-------|
| Miserableness                                                                                                         | 0.03  | 0.694 | 0.15  | 6.00E-04 | -1.51 | 0.131 |
| Townsend deprivation index at recruitment                                                                             | -0.03 | 0.728 | 0.10  | 0.007    | -1.51 | 0.132 |
| Illness, injury, bereavement, stress in last 2 years: Financial difficulties                                          | 0.06  | 0.447 | 0.19  | 8.82E-07 | -1.50 | 0.134 |
| Treatment/medication code: half-inderal la 80mg m/r capsule                                                           | 0.58  | 0.195 | -0.14 | 0.430    | 1.50  | 0.134 |
| Non-cancer illness code, self-reported: diverticular disease/diverticulitis                                           | -0.14 | 0.218 | 0.05  | 0.393    | -1.49 | 0.137 |
| Diagnoses - main ICD10: K22 Other diseases of oesophagus                                                              | 0.28  | 0.149 | -0.07 | 0.595    | 1.49  | 0.137 |
| Non-cancer illness code, self-reported: breast fibroadenoma                                                           | 0.28  | 0.284 | -0.16 | 0.246    | 1.48  | 0.139 |
| Relative age voice broke                                                                                              | 0.02  | 0.840 | -0.11 | 0.008    | 1.48  | 0.139 |
| Treatment/medication code: venlafaxine                                                                                | -0.08 | 0.654 | 0.22  | 0.027    | -1.48 | 0.139 |
| Duration of light DIY                                                                                                 | -0.05 | 0.598 | 0.10  | 0.034    | -1.48 | 0.140 |
| Treatment/medication code: flecainide                                                                                 | 0.25  | 0.267 | -0.11 | 0.241    | 1.47  | 0.142 |
| Types of transport used (excluding work): Cycle                                                                       | 0.05  | 0.577 | -0.09 | 0.037    | 1.47  | 0.142 |
| Non-cancer illness code, self-reported: other renal/kidney problem                                                    | -0.40 | 0.341 | 0.37  | 0.242    | -1.46 | 0.144 |
| Non-cancer illness code, self-reported: tennis elbow / lateral epicondylitis                                          | -0.36 | 0.211 | 0.12  | 0.450    | -1.46 | 0.145 |
| Financial situation satisfaction                                                                                      | 0.00  | 0.987 | 0.15  | 0.002    | -1.45 | 0.146 |
| Treatment/medication code: cetirizine                                                                                 | -0.11 | 0.505 | 0.15  | 0.043    | -1.45 | 0.148 |
| Blood clot, DVT, bronchitis, emphysema, asthma, rhinitis, eczema, allergy diagnosed by doctor: Blood clot in the lung | -0.06 | 0.691 | 0.18  | 0.010    | -1.45 | 0.148 |
| Number of operations, self-reported                                                                                   | 0.05  | 0.483 | 0.18  | 3.45E-05 | -1.44 | 0.149 |
| Seen a psychiatrist for nerves, anxiety, tension or depression                                                        | 0.02  | 0.763 | 0.15  | 5.25E-05 | -1.44 | 0.149 |
| Underlying (primary) cause of death: ICD10: C64 Malignant neoplasm of kidney, except renal pelvis                     | -0.40 | 0.190 | 0.08  | 0.550    | -1.44 | 0.150 |
| Diagnoses - main ICD10: S69 Other and unspecified injuries of wrist and hand                                          | -0.36 | 0.226 | 0.10  | 0.430    | -1.43 | 0.153 |
| Diagnoses - main ICD10: Z48 Other surgical follow-up care                                                             | 0.53  | 0.070 | 0.08  | 0.530    | 1.42  | 0.155 |
| Treatment/medication code: liothyronine                                                                               | -0.27 | 0.508 | 0.62  | 0.194    | -1.42 | 0.156 |
| Treatment/medication code: ferrous salt product                                                                       | 0.57  | 0.180 | -0.07 | 0.647    | 1.42  | 0.156 |
| Non-cancer illness code, self-reported: acute infective polyneuritis/guillain-barre syndrome                          | 0.20  | 0.430 | -0.19 | 0.092    | 1.41  | 0.157 |
| Had major operations                                                                                                  | 0.01  | 0.919 | 0.19  | 2.00E-04 | -1.41 | 0.158 |
| Medication for cholesterol, blood pressure or diabetes: Insulin                                                       | 0.12  | 0.540 | 0.46  | 3.00E-04 | -1.41 | 0.158 |
| Treatment/medication code: acrivastine                                                                                | -0.44 | 0.258 | 0.16  | 0.384    | -1.39 | 0.164 |

|                                                                                                                 |       |       |       |          |       |       |
|-----------------------------------------------------------------------------------------------------------------|-------|-------|-------|----------|-------|-------|
| Home area population density - urban or rural: England/Wales - Hamlet and Isolated Dwelling - less sparse       | 0.16  | 0.343 | -0.10 | 0.225    | 1.39  | 0.164 |
| Non-cancer illness code, self-reported: blistering/desquamating skin disorder                                   | 0.15  | 0.487 | -0.18 | 0.092    | 1.39  | 0.164 |
| Fractured bone site(s): Other bones                                                                             | 0.32  | 0.029 | 0.10  | 0.110    | 1.39  | 0.165 |
| Treatment/medication code: prednisolone product                                                                 | 0.57  | 0.098 | 0.06  | 0.656    | 1.38  | 0.166 |
| Diagnoses - main ICD10: M46 Other inflammatory spondylopathies                                                  | 0.28  | 0.295 | -0.18 | 0.361    | 1.38  | 0.166 |
| Non-cancer illness code, self-reported: pancreatitis                                                            | -0.47 | 0.328 | 0.29  | 0.284    | -1.38 | 0.169 |
| Underlying (primary) cause of death: ICD10: C15.9 Oesophagus, unspecified                                       | 0.36  | 0.356 | -0.24 | 0.215    | 1.38  | 0.169 |
| Transport type for commuting to job workplace: Public transport                                                 | 0.16  | 0.121 | 0.00  | 0.987    | 1.37  | 0.169 |
| Diagnoses - main ICD10: O03 Spontaneous abortion                                                                | 0.30  | 0.282 | -0.14 | 0.379    | 1.37  | 0.170 |
| Maximum heart rate during fitness test                                                                          | 0.10  | 0.408 | -0.11 | 0.247    | 1.37  | 0.171 |
| Diagnoses - main ICD10: R26 Abnormalities of gait and mobility                                                  | -0.28 | 0.342 | 0.20  | 0.298    | -1.36 | 0.172 |
| Diagnoses - main ICD10: Z09 Follow-up examination after treatment for conditions other than malignant neoplasms | 0.30  | 0.181 | -0.03 | 0.738    | 1.36  | 0.173 |
| Started insulin within one year diagnosis of diabetes                                                           | 0.10  | 0.617 | 0.40  | 4.00E-04 | -1.36 | 0.174 |
| Treatment/medication code: iron product                                                                         | -0.13 | 0.691 | 0.41  | 0.079    | -1.36 | 0.175 |
| Peak expiratory flow (PEF)                                                                                      | -0.07 | 0.288 | 0.03  | 0.394    | -1.36 | 0.175 |
| Treatment/medication code: anastrozole                                                                          | -0.46 | 0.286 | 0.17  | 0.339    | -1.35 | 0.176 |
| Non-cancer illness code, self-reported: gastric/stomach ulcers                                                  | 0.65  | 0.132 | 0.02  | 0.903    | 1.35  | 0.176 |
| Diagnoses - main ICD10: K57 Diverticular disease of intestine                                                   | -0.15 | 0.155 | 0.02  | 0.798    | -1.35 | 0.177 |
| Underlying (primary) cause of death: ICD10: I71.0 Dissection of aorta [any part]                                | 0.86  | 0.187 | -0.06 | 0.773    | 1.35  | 0.178 |
| Diagnoses - main ICD10: T18 Foreign body in alimentary tract                                                    | -0.12 | 0.622 | 0.25  | 0.051    | -1.35 | 0.178 |
| Forced expiratory volume in 1-second (FEV1)                                                                     | -0.09 | 0.099 | -0.01 | 0.831    | -1.34 | 0.179 |
| Leg pain when walking normally                                                                                  | -0.13 | 0.630 | 0.29  | 0.071    | -1.34 | 0.180 |
| Diagnoses - main ICD10: M05 Seropositive rheumatoid arthritis                                                   | 0.54  | 0.073 | 0.08  | 0.593    | 1.34  | 0.180 |
| Diagnoses - main ICD10: N64 Other disorders of breast                                                           | -0.20 | 0.534 | 0.30  | 0.122    | -1.34 | 0.180 |
| Types of transport used (excluding work): Car/motor vehicle                                                     | -0.07 | 0.441 | 0.06  | 0.115    | -1.34 | 0.181 |
| Non-cancer illness code, self-reported: miscarriage                                                             | -0.43 | 0.242 | 0.12  | 0.518    | -1.34 | 0.181 |
| Treatment/medication code: nortriptyline                                                                        | 0.52  | 0.243 | -0.18 | 0.515    | 1.34  | 0.182 |
| Treatment/medication code: minocycline                                                                          | 0.39  | 0.213 | -0.08 | 0.619    | 1.33  | 0.182 |
| Nervous feelings                                                                                                | -0.03 | 0.673 | 0.09  | 0.080    | -1.32 | 0.186 |



|                                                                                                                                     |       |       |       |       |       |       |
|-------------------------------------------------------------------------------------------------------------------------------------|-------|-------|-------|-------|-------|-------|
| Mother still alive                                                                                                                  | 0.13  | 0.519 | -0.17 | 0.104 | 1.32  | 0.186 |
| Non-cancer illness code, self-reported: spine arthritis/spondylitis                                                                 | -0.12 | 0.533 | 0.16  | 0.067 | -1.32 | 0.187 |
| Non-cancer illness code, self-reported: bell's palsy/facial nerve palsy                                                             | 0.13  | 0.603 | -0.26 | 0.081 | 1.32  | 0.188 |
| Types of physical activity in last 4 weeks: Light DIY (eg: pruning, watering the lawn)                                              | 0.02  | 0.778 | -0.08 | 0.032 | 1.32  | 0.188 |
| Alcohol drinker status: Previous                                                                                                    | -0.09 | 0.406 | 0.07  | 0.205 | -1.32 | 0.188 |
| Diagnoses - main ICD10: O60 Preterm delivery                                                                                        | 0.18  | 0.643 | -0.46 | 0.120 | 1.32  | 0.188 |
| Mouth/teeth dental problems: Dentures                                                                                               | -0.03 | 0.664 | 0.08  | 0.088 | -1.32 | 0.189 |
| Diagnoses - main ICD10: Z71 Persons encountering health services for other counselling and medical advice, not elsewhere classified | 0.53  | 0.296 | -0.19 | 0.383 | 1.31  | 0.191 |
| Treatment/medication code: indivina 1mg/2.5mg tablet                                                                                | -0.34 | 0.213 | 0.05  | 0.679 | -1.31 | 0.191 |
| Diagnoses - main ICD10: C22 Malignant neoplasm of liver and intrahepatic bile ducts                                                 | -0.09 | 0.714 | 0.27  | 0.045 | -1.30 | 0.192 |
| Non-cancer illness code, self-reported: psoriasis                                                                                   | -0.03 | 0.854 | 0.21  | 0.022 | -1.30 | 0.193 |
| Ever had bowel cancer screening                                                                                                     | -0.04 | 0.666 | 0.10  | 0.042 | -1.30 | 0.194 |
| Vitamin and mineral supplements: Vitamin B                                                                                          | -0.10 | 0.481 | 0.11  | 0.142 | -1.30 | 0.194 |
| Illness, injury, bereavement, stress in last 2 years: Death of a close relative                                                     | -0.19 | 0.247 | 0.04  | 0.564 | -1.29 | 0.196 |
| Non-cancer illness code, self-reported: emphysema                                                                                   | -0.48 | 0.188 | 0.02  | 0.879 | -1.29 | 0.196 |
| Ever depressed for a whole week                                                                                                     | 0.00  | 0.988 | 0.14  | 0.006 | -1.29 | 0.198 |
| Non-cancer illness code, self-reported: enlarged prostate                                                                           | 0.15  | 0.376 | -0.09 | 0.243 | 1.29  | 0.198 |
| Treatment/medication code: merbentyl 10mg tablet                                                                                    | 0.51  | 0.365 | -0.40 | 0.351 | 1.29  | 0.198 |
| Tense / 'highly strung'                                                                                                             | 0.01  | 0.934 | 0.12  | 0.006 | -1.29 | 0.198 |
| Treatment/medication code: valsartan                                                                                                | -0.22 | 0.194 | 0.03  | 0.757 | -1.29 | 0.199 |
| Diagnoses - main ICD10: H25 Senile cataract                                                                                         | 0.06  | 0.779 | -0.25 | 0.057 | 1.29  | 0.199 |
| Able to walk or cycle unaided for 10 minutes                                                                                        | 0.04  | 0.892 | -0.35 | 0.022 | 1.28  | 0.200 |
| Diagnoses - main ICD10: H80 Otosclerosis                                                                                            | -0.33 | 0.104 | -0.03 | 0.768 | -1.28 | 0.200 |
| Illnesses of mother: Chronic bronchitis/emphysema                                                                                   | 0.00  | 0.966 | 0.15  | 0.002 | -1.27 | 0.202 |
| Treatment/medication code: betnovate cream                                                                                          | -1.05 | 0.271 | 0.30  | 0.519 | -1.27 | 0.203 |
| Diagnoses - main ICD10: L50 Urticaria                                                                                               | -0.33 | 0.231 | 0.06  | 0.660 | -1.27 | 0.204 |
| Treatment/medication code: amias 2mg tablet                                                                                         | 0.53  | 0.273 | -0.12 | 0.496 | 1.27  | 0.205 |
| Vitamin and mineral supplements: Folic acid or Folate (Vit B9)                                                                      | 0.08  | 0.728 | 0.44  | 0.005 | -1.27 | 0.205 |
| Non-cancer illness code, self-reported: kidney stone/ureter stone/bladder stone                                                     | -0.06 | 0.614 | 0.12  | 0.110 | -1.26 | 0.206 |

|                                                                                            |       |       |       |          |       |       |
|--------------------------------------------------------------------------------------------|-------|-------|-------|----------|-------|-------|
| Diagnoses - main ICD10: K90 Intestinal malabsorption                                       | -0.01 | 0.976 | 0.25  | 0.025    | -1.26 | 0.207 |
| Exposure to tobacco smoke outside home                                                     | -0.02 | 0.801 | 0.10  | 0.021    | -1.26 | 0.207 |
| Sodium in urine                                                                            | -0.06 | 0.353 | 0.03  | 0.361    | -1.26 | 0.208 |
| Cancer code, self-reported: tongue cancer                                                  | -0.11 | 0.611 | 0.21  | 0.088    | -1.26 | 0.209 |
| Diagnoses - main ICD10: N28 Other disorders of kidney and ureter, not elsewhere classified | -0.41 | 0.204 | 0.12  | 0.663    | -1.26 | 0.209 |
| Diagnoses - main ICD10: L85 Other epidermal thickening                                     | 0.65  | 0.164 | -0.02 | 0.926    | 1.26  | 0.209 |
| Non-cancer illness code, self-reported: cerebral aneurysm                                  | -0.38 | 0.139 | -0.03 | 0.814    | -1.26 | 0.209 |
| Fractured bone site(s): Arm                                                                | -0.08 | 0.683 | 0.20  | 0.060    | -1.25 | 0.210 |
| Cancer code, self-reported: rectal cancer                                                  | 0.34  | 0.173 | -0.01 | 0.925    | 1.25  | 0.210 |
| Doctor diagnosed bronchiectasis                                                            | 0.60  | 0.080 | 0.13  | 0.396    | 1.25  | 0.211 |
| Diagnoses - main ICD10: D24 Benign neoplasm of breast                                      | 0.56  | 0.265 | -0.12 | 0.562    | 1.25  | 0.212 |
| Treatment/medication code: indapamide                                                      | 0.57  | 0.109 | 0.09  | 0.534    | 1.25  | 0.213 |
| Why reduced smoking: Illness or ill health                                                 | 0.45  | 0.025 | 0.15  | 0.245    | 1.24  | 0.213 |
| Non-cancer illness code, self-reported: pulmonary embolism +/- dvt                         | -0.05 | 0.768 | 0.17  | 0.023    | -1.24 | 0.215 |
| Cancer code, self-reported: malignant melanoma                                             | -0.35 | 0.053 | -0.09 | 0.345    | -1.23 | 0.217 |
| Non-accidental death in close genetic family                                               | 0.31  | 0.057 | 0.07  | 0.447    | 1.23  | 0.217 |
| Number of days/week walked 10+ minutes                                                     | 0.02  | 0.747 | -0.07 | 0.046    | 1.23  | 0.217 |
| Treatment/medication code: strontium product                                               | -0.35 | 0.228 | 0.04  | 0.749    | -1.23 | 0.217 |
| Treatment/medication code: beclometasone                                                   | -0.06 | 0.745 | 0.19  | 0.057    | -1.23 | 0.218 |
| Health satisfaction                                                                        | 0.10  | 0.186 | 0.21  | 2.46E-05 | -1.23 | 0.219 |
| Non-cancer illness code, self-reported: post-natal depression                              | -0.53 | 0.358 | 0.28  | 0.384    | -1.23 | 0.220 |
| Treatment/medication code: clonidine                                                       | -0.04 | 0.848 | 0.26  | 0.029    | -1.22 | 0.222 |
| Diagnoses - main ICD10: Z42 Follow-up care involving plastic surgery                       | -0.33 | 0.220 | 0.04  | 0.777    | -1.22 | 0.222 |
| Diagnoses - main ICD10: S52 Fracture of forearm                                            | -0.15 | 0.369 | 0.09  | 0.389    | -1.22 | 0.223 |
| Duration of moderate activity                                                              | -0.10 | 0.277 | 0.02  | 0.574    | -1.22 | 0.223 |
| Mineral and other dietary supplements: Zinc                                                | -0.12 | 0.302 | 0.04  | 0.517    | -1.22 | 0.223 |
| Types of transport used (excluding work): None of the above                                | -0.11 | 0.507 | 0.11  | 0.151    | -1.21 | 0.224 |
| Number of unenthusiastic/disinterested episodes                                            | -0.09 | 0.700 | 0.22  | 0.053    | -1.21 | 0.225 |
| Forced expiratory volume in 1-second (FEV1), Best measure                                  | -0.08 | 0.135 | -0.01 | 0.815    | -1.21 | 0.226 |

|                                                                                                                                                            |       |       |       |          |       |       |
|------------------------------------------------------------------------------------------------------------------------------------------------------------|-------|-------|-------|----------|-------|-------|
| Pulse wave reflection index                                                                                                                                | -0.11 | 0.268 | 0.03  | 0.625    | -1.21 | 0.227 |
| Why stopped smoking: Health precaution                                                                                                                     | 0.08  | 0.462 | -0.07 | 0.207    | 1.21  | 0.227 |
| Diagnoses - main ICD10: N39 Other disorders of urinary system                                                                                              | 0.01  | 0.967 | 0.25  | 0.008    | -1.20 | 0.229 |
| Diagnoses - main ICD10: D70 Agranulocytosis                                                                                                                | -0.83 | 0.193 | -0.03 | 0.885    | -1.20 | 0.230 |
| Non-cancer illness code, self-reported: helicobacter pylori                                                                                                | -0.23 | 0.385 | 0.12  | 0.322    | -1.20 | 0.231 |
| Ever stopped smoking for 6+ months                                                                                                                         | -0.06 | 0.743 | 0.17  | 0.029    | -1.20 | 0.232 |
| Eye problems/disorders: Cataract                                                                                                                           | 0.16  | 0.213 | -0.01 | 0.851    | 1.19  | 0.232 |
| Diagnoses - main ICD10: R06 Abnormalities of breathing                                                                                                     | -0.30 | 0.246 | 0.04  | 0.734    | -1.19 | 0.235 |
| Medication for pain relief, constipation, heartburn: None of the above                                                                                     | -0.08 | 0.173 | -0.16 | 1.41E-07 | 1.19  | 0.235 |
| Reason for glasses/contact lenses: For long-sightedness, i.e. for distance and near, but particularly for near tasks like reading (called 'hypermetropia') | -0.02 | 0.843 | 0.14  | 0.027    | -1.18 | 0.236 |
| Diagnoses - main ICD10: K30 Dyspepsia                                                                                                                      | 0.29  | 0.165 | 0.02  | 0.844    | 1.18  | 0.236 |
| Treatment/medication code: felodipine                                                                                                                      | 0.19  | 0.352 | -0.09 | 0.459    | 1.18  | 0.237 |
| Treatment/medication code: tamoxifen                                                                                                                       | -0.36 | 0.264 | 0.06  | 0.689    | -1.18 | 0.237 |
| Non-cancer illness code, self-reported: ear/vestibular disorder                                                                                            | -0.01 | 0.963 | 0.38  | 0.043    | -1.17 | 0.241 |
| Treatment/medication code: capasal shampoo                                                                                                                 | -0.23 | 0.330 | 0.10  | 0.515    | -1.17 | 0.241 |
| Pain type(s) experienced in last month: Stomach or abdominal pain                                                                                          | 0.08  | 0.426 | 0.20  | 5.36E-06 | -1.17 | 0.243 |
| Treatment/medication code: isosorbide mononitrate                                                                                                          | -0.12 | 0.500 | 0.12  | 0.225    | -1.17 | 0.243 |
| Diagnoses - main ICD10: G62 Other polyneuropathies                                                                                                         | 0.23  | 0.395 | -0.13 | 0.382    | 1.17  | 0.244 |
| Treatment/medication code: amiloride                                                                                                                       | 0.60  | 0.065 | 0.18  | 0.204    | 1.16  | 0.244 |
| Treatment/medication code: trimethoprim                                                                                                                    | -0.17 | 0.656 | 0.43  | 0.221    | -1.16 | 0.245 |
| Diagnoses - main ICD10: R11 Nausea and vomiting                                                                                                            | 0.56  | 0.128 | 0.09  | 0.604    | 1.16  | 0.245 |
| Diagnoses - main ICD10: H65 Nonsuppurative otitis media                                                                                                    | 0.07  | 0.799 | 0.46  | 0.037    | -1.16 | 0.245 |
| Manic/hyper symptoms: I was more talkative than usual                                                                                                      | -0.46 | 0.177 | -0.03 | 0.820    | -1.16 | 0.245 |
| Treatment/medication code: olmesartan                                                                                                                      | 0.29  | 0.355 | -0.11 | 0.455    | 1.16  | 0.247 |
| Diagnoses - main ICD10: C50 Malignant neoplasm of breast                                                                                                   | -0.19 | 0.138 | -0.02 | 0.711    | -1.16 | 0.247 |
| Diagnoses - main ICD10: K35 Acute appendicitis                                                                                                             | -0.13 | 0.626 | 0.24  | 0.159    | -1.16 | 0.247 |
| Treatment/medication code: gaviscon liquid                                                                                                                 | 0.55  | 0.045 | 0.21  | 0.070    | 1.16  | 0.248 |
| Diagnoses - main ICD10: D36 Benign neoplasm of other and unspecified sites                                                                                 | -0.59 | 0.252 | 0.04  | 0.828    | -1.16 | 0.248 |
| Diagnoses - main ICD10: H59 Postprocedural disorders of eye and adnexa, not elsewhere classified                                                           | 0.27  | 0.453 | -0.21 | 0.325    | 1.15  | 0.250 |

|                                                                                              |       |       |       |       |       |       |
|----------------------------------------------------------------------------------------------|-------|-------|-------|-------|-------|-------|
| Diagnoses - main ICD10: G70 Myasthenia gravis and other myoneural disorders                  | 0.86  | 0.105 | 0.20  | 0.346 | 1.15  | 0.251 |
| Cancer code, self-reported: thyroid cancer                                                   | 0.21  | 0.363 | -0.10 | 0.490 | 1.14  | 0.255 |
| Treatment/medication code: trandolapril                                                      | -0.25 | 0.321 | 0.07  | 0.586 | -1.13 | 0.257 |
| Non-cancer illness code, self-reported: epilepsy                                             | -0.21 | 0.410 | 0.11  | 0.382 | -1.13 | 0.258 |
| Diagnoses - main ICD10: I31 Other diseases of pericardium                                    | -0.13 | 0.654 | 0.27  | 0.177 | -1.13 | 0.258 |
| Underlying (primary) cause of death: ICD10: C91.0 Acute lymphoblastic leukaemia              | 0.33  | 0.495 | -0.34 | 0.323 | 1.13  | 0.258 |
| Non-cancer illness code, self-reported: oesophageal disorder                                 | 0.30  | 0.235 | -0.01 | 0.925 | 1.13  | 0.259 |
| Diagnoses - main ICD10: C78 Secondary malignant neoplasm of respiratory and digestive organs | 0.42  | 0.259 | -0.03 | 0.831 | 1.13  | 0.259 |
| Treatment/medication code: terbinafine                                                       | 0.38  | 0.134 | 0.07  | 0.507 | 1.13  | 0.259 |
| Underlying (primary) cause of death: ICD10: C67.9 Bladder, unspecified                       | -0.29 | 0.346 | 0.09  | 0.508 | -1.13 | 0.259 |
| Treatment/medication code: etodolac                                                          | 0.46  | 0.160 | 0.05  | 0.737 | 1.12  | 0.261 |
| Number of trend entries                                                                      | 0.17  | 0.348 | -0.06 | 0.535 | 1.12  | 0.263 |
| Diagnoses - main ICD10: Z30 Contraceptive management                                         | -0.65 | 0.127 | -0.14 | 0.387 | -1.11 | 0.265 |
| Job involves mainly walking or standing                                                      | -0.04 | 0.572 | 0.05  | 0.142 | -1.11 | 0.267 |
| Treatment/medication code: rosiglitazone                                                     | 0.20  | 0.331 | -0.06 | 0.598 | 1.11  | 0.269 |
| Treatment/medication code: kapake tablet                                                     | 0.11  | 0.600 | -0.17 | 0.202 | 1.10  | 0.271 |
| Diagnoses - main ICD10: I47 Paroxysmal tachycardia                                           | 0.32  | 0.189 | 0.03  | 0.817 | 1.10  | 0.272 |
| Back pain for 3+ months                                                                      | 0.00  | 0.982 | 0.16  | 0.018 | -1.10 | 0.273 |
| Diagnoses - main ICD10: K42 Umbilical hernia                                                 | -0.03 | 0.866 | 0.21  | 0.073 | -1.09 | 0.274 |
| Treatment/medication code: doxazosin                                                         | 0.30  | 0.025 | 0.12  | 0.280 | 1.09  | 0.274 |
| Diagnoses - main ICD10: H26 Other cataract                                                   | 0.23  | 0.076 | 0.07  | 0.261 | 1.09  | 0.275 |
| Frequency of walking for pleasure in last 4 weeks                                            | -0.06 | 0.477 | 0.05  | 0.296 | -1.09 | 0.275 |
| Underlying (primary) cause of death: ICD10: J45.9 Asthma, unspecified                        | -0.31 | 0.196 | -0.02 | 0.902 | -1.09 | 0.277 |
| Number of spontaneous miscarriages                                                           | -0.25 | 0.251 | 0.01  | 0.928 | -1.09 | 0.277 |
| Diagnoses - main ICD10: J33 Nasal polyp                                                      | -0.17 | 0.455 | 0.10  | 0.350 | -1.09 | 0.278 |
| Diagnoses - main ICD10: M20 Acquired deformities of fingers and toes                         | -0.21 | 0.068 | -0.07 | 0.276 | -1.08 | 0.278 |
| Non-cancer illness code, self-reported: head injury                                          | -0.12 | 0.549 | 0.12  | 0.206 | -1.08 | 0.278 |
| Diagnoses - main ICD10: K08 Other disorders of teeth and supporting structures               | 0.24  | 0.259 | -0.02 | 0.880 | 1.08  | 0.279 |
| Illnesses of father: Chronic bronchitis/emphysema                                            | 0.02  | 0.872 | 0.15  | 0.011 | -1.08 | 0.279 |

|                                                                                                                            |       |       |       |          |       |       |
|----------------------------------------------------------------------------------------------------------------------------|-------|-------|-------|----------|-------|-------|
| Treatment/medication code: daktacort cream                                                                                 | -0.39 | 0.186 | -0.04 | 0.794    | -1.08 | 0.280 |
| Treatment/medication code: canesten 1% cream                                                                               | -0.18 | 0.617 | 0.27  | 0.209    | -1.08 | 0.282 |
| Light smokers, at least 100 smokes in lifetime                                                                             | 0.12  | 0.166 | 0.02  | 0.624    | 1.07  | 0.283 |
| Diagnoses - main ICD10: N34 Urethritis and urethral syndrome                                                               | -0.66 | 0.182 | -0.10 | 0.577    | -1.07 | 0.283 |
| Blood clot, DVT, bronchitis, emphysema, asthma, rhinitis, eczema, allergy diagnosed by doctor: None of the above           | 0.01  | 0.842 | -0.07 | 0.068    | 1.07  | 0.283 |
| Mineral and other dietary supplements: None of the above                                                                   | -0.06 | 0.425 | 0.04  | 0.453    | -1.07 | 0.283 |
| Non-cancer illness code, self-reported: spinal cord disorder                                                               | 0.17  | 0.632 | -0.30 | 0.233    | 1.07  | 0.285 |
| Diagnoses - main ICD10: G51 Facial nerve disorders                                                                         | 0.74  | 0.410 | -0.30 | 0.421    | 1.07  | 0.285 |
| Job involves heavy manual or physical work                                                                                 | -0.03 | 0.642 | 0.05  | 0.119    | -1.07 | 0.285 |
| Treatment/medication code: alendronate sodium                                                                              | 0.02  | 0.871 | 0.18  | 0.029    | -1.07 | 0.286 |
| Pain type(s) experienced in last month: Hip pain                                                                           | 0.11  | 0.183 | 0.21  | 4.94E-05 | -1.07 | 0.286 |
| Blood clot, DVT, bronchitis, emphysema, asthma, rhinitis, eczema, allergy diagnosed by doctor: Blood clot in the leg (DVT) | -0.04 | 0.738 | 0.12  | 0.147    | -1.06 | 0.287 |
| Diagnoses - main ICD10: S01 Open wound of head                                                                             | 0.79  | 0.251 | 0.04  | 0.828    | 1.06  | 0.287 |
| Fractured/broken bones in last 5 years                                                                                     | 0.27  | 0.011 | 0.14  | 0.002    | 1.06  | 0.290 |
| Treatment/medication code: nifedipine                                                                                      | 0.49  | 0.102 | 0.13  | 0.431    | 1.06  | 0.290 |
| Home area population density - urban or rural: Scotland - Large Urban Area                                                 | 0.06  | 0.657 | -0.11 | 0.176    | 1.06  | 0.291 |
| Diagnoses - main ICD10: Z03 Medical observation and evaluation for suspected diseases and conditions                       | 0.28  | 0.203 | 0.01  | 0.938    | 1.06  | 0.291 |
| Diagnoses - main ICD10: K76 Other diseases of liver                                                                        | -0.22 | 0.281 | 0.02  | 0.859    | -1.05 | 0.292 |
| Non-cancer illness code, self-reported: pulmonary fibrosis                                                                 | 0.54  | 0.223 | 0.05  | 0.773    | 1.05  | 0.293 |
| Treatment/medication code: multivitamin+mineral preparations                                                               | -0.05 | 0.800 | 0.17  | 0.071    | -1.05 | 0.294 |
| Diagnoses - main ICD10: C02 Malignant neoplasm of other and unspecified parts of tongue                                    | -0.07 | 0.703 | 0.15  | 0.132    | -1.05 | 0.294 |
| Diagnoses - main ICD10: K00 Disorders of tooth development and eruption                                                    | 0.57  | 0.208 | 0.07  | 0.653    | 1.05  | 0.295 |
| Diagnoses - main ICD10: D05 Carcinoma in situ of breast                                                                    | -0.28 | 0.513 | 0.25  | 0.348    | -1.05 | 0.295 |
| Non-cancer illness code, self-reported: spinal injury                                                                      | 0.20  | 0.402 | -0.13 | 0.527    | 1.05  | 0.295 |
| Reason for reducing amount of alcohol drunk: Illness or ill health                                                         | 0.07  | 0.737 | 0.30  | 0.002    | -1.04 | 0.299 |
| Treatment/medication code: beconase 50micrograms nasal spray                                                               | -0.10 | 0.690 | 0.21  | 0.190    | -1.04 | 0.299 |
| Treatment/medication code: gtn 400micrograms spray                                                                         | -0.16 | 0.405 | 0.06  | 0.523    | -1.03 | 0.302 |

|                                                                                       |       |       |       |          |       |       |
|---------------------------------------------------------------------------------------|-------|-------|-------|----------|-------|-------|
| Non-cancer illness code, self-reported: carpal tunnel syndrome                        | 0.37  | 0.104 | 0.09  | 0.502    | 1.03  | 0.303 |
| Forced vital capacity (FVC)                                                           | -0.08 | 0.107 | -0.02 | 0.382    | -1.03 | 0.304 |
| Diagnoses - main ICD10: D23 Other benign neoplasms of skin                            | -0.28 | 0.286 | 0.01  | 0.906    | -1.03 | 0.304 |
| Diagnoses - main ICD10: K41 Femoral hernia                                            | 0.64  | 0.226 | 0.03  | 0.909    | 1.03  | 0.305 |
| Treatment/medication code: telmisartan                                                | -0.11 | 0.635 | 0.16  | 0.220    | -1.03 | 0.305 |
| Number of unsuccessful stop-smoking attempts                                          | -0.09 | 0.450 | 0.05  | 0.473    | -1.02 | 0.306 |
| Non-cancer illness code, self-reported: gastrointestinal bleeding                     | -0.28 | 0.561 | 0.33  | 0.347    | -1.02 | 0.306 |
| Treatment/medication code: doxycycline                                                | 0.75  | 0.235 | 0.08  | 0.653    | 1.02  | 0.309 |
| Current employment status: Unable to work because of sickness or disability           | 0.07  | 0.367 | 0.17  | 6.00E-04 | -1.02 | 0.309 |
| Fractured bone site(s): Hip                                                           | 0.45  | 0.083 | 0.14  | 0.369    | 1.02  | 0.310 |
| Which eye(s) affected by myopia (short sight): Right eye                              | 0.13  | 0.528 | -0.10 | 0.299    | 1.01  | 0.310 |
| Cancer code, self-reported: brain cancer / primary malignant brain tumour             | -0.92 | 0.390 | 0.22  | 0.524    | -1.01 | 0.311 |
| Snoring                                                                               | 0.00  | 0.964 | -0.07 | 0.041    | 1.01  | 0.312 |
| Non-cancer illness code, self-reported: cataract                                      | -0.03 | 0.893 | 0.19  | 0.047    | -1.01 | 0.312 |
| Treatment/medication code: flucloxacillin                                             | 0.38  | 0.456 | -0.19 | 0.438    | 1.01  | 0.313 |
| Treatment/medication code: penicillin                                                 | 0.44  | 0.515 | -0.36 | 0.387    | 1.01  | 0.314 |
| Treatment/medication code: deep relief ibuprofen gel                                  | -0.15 | 0.437 | 0.07  | 0.489    | -1.01 | 0.314 |
| Diagnoses - main ICD10: D22 Melanocytic naevi                                         | -0.93 | 0.375 | 0.17  | 0.580    | -1.01 | 0.315 |
| Arm fat-free mass (left)                                                              | 0.05  | 0.321 | 0.11  | 2.00E-04 | -1.00 | 0.318 |
| Diagnoses - main ICD10: R40 Somnolence, stupor and coma                               | 0.21  | 0.514 | -0.16 | 0.390    | 1.00  | 0.318 |
| Diagnoses - main ICD10: R30 Pain associated with micturition                          | -0.24 | 0.378 | 0.06  | 0.638    | -1.00 | 0.319 |
| Ever taken oral contraceptive pill                                                    | -0.10 | 0.424 | 0.04  | 0.523    | -1.00 | 0.319 |
| Treatment/medication code: liquifilm tears 1.4% eye drops                             | -0.50 | 0.439 | 0.19  | 0.462    | -1.00 | 0.319 |
| Treatment/medication code: calcium carbonate+cholecalciferol 1.25g/5micrograms tablet | 0.01  | 0.960 | 0.26  | 0.036    | -1.00 | 0.319 |
| Treatment/medication code: citalopram                                                 | 0.04  | 0.808 | 0.22  | 0.015    | -1.00 | 0.320 |
| Treatment/medication code: loperamide                                                 | -0.16 | 0.597 | 0.19  | 0.277    | -1.00 | 0.320 |
| Non-cancer illness code, self-reported: hepatitis a                                   | -0.60 | 0.484 | 0.32  | 0.372    | -0.99 | 0.320 |
| Non-cancer illness code, self-reported: sciatica                                      | 0.49  | 0.119 | 0.15  | 0.295    | 0.99  | 0.320 |
| Treatment/medication code: clobetasol                                                 | 0.53  | 0.121 | 0.16  | 0.270    | 0.99  | 0.320 |

|                                                                                                                             |       |       |       |          |       |       |
|-----------------------------------------------------------------------------------------------------------------------------|-------|-------|-------|----------|-------|-------|
| Arm predicted mass (left)                                                                                                   | 0.05  | 0.321 | 0.11  | 2.00E-04 | -0.99 | 0.321 |
| Blood clot, DVT, bronchitis, emphysema, asthma, rhinitis, eczema, allergy diagnosed by doctor: Emphysema/chronic bronchitis | 0.32  | 0.003 | 0.18  | 0.051    | 0.99  | 0.321 |
| Non-cancer illness code, self-reported: fracture skull / head                                                               | -0.36 | 0.198 | -0.05 | 0.731    | -0.99 | 0.323 |
| Illnesses of father: Stroke                                                                                                 | -0.07 | 0.700 | 0.14  | 0.158    | -0.99 | 0.323 |
| Diagnoses - main ICD10: I10 Essential (primary) hypertension                                                                | 0.45  | 0.093 | 0.16  | 0.224    | 0.99  | 0.324 |
| Illnesses of father: Alzheimer's disease/dementia                                                                           | 0.62  | 0.449 | -0.27 | 0.479    | 0.99  | 0.324 |
| Diagnoses - main ICD10: A04 Other bacterial intestinal infections                                                           | 0.39  | 0.099 | 0.13  | 0.277    | 0.98  | 0.325 |
| Treatment/medication code: e45 cream                                                                                        | -0.56 | 0.341 | 0.04  | 0.804    | -0.98 | 0.325 |
| Diagnoses - main ICD10: D50 Iron deficiency anaemia                                                                         | 0.48  | 0.037 | 0.23  | 0.032    | 0.98  | 0.326 |
| Ever had cervical smear test                                                                                                | 0.30  | 0.192 | 0.05  | 0.610    | 0.98  | 0.327 |
| Underlying (primary) cause of death: ICD10: C45.9 Mesothelioma, unspecified                                                 | 0.29  | 0.286 | 0.00  | 0.976    | 0.98  | 0.327 |
| Why reduced smoking: Doctor's advice                                                                                        | 0.30  | 0.411 | -0.14 | 0.595    | 0.98  | 0.329 |
| Diagnoses - main ICD10: N70 Salpingitis and oophoritis                                                                      | -0.13 | 0.708 | 0.32  | 0.283    | -0.97 | 0.331 |
| Underlying (primary) cause of death: ICD10: A81.0 Creutzfeldt-Jakob disease                                                 | 0.25  | 0.287 | -0.02 | 0.880    | 0.97  | 0.331 |
| Leg pain in calf/calves                                                                                                     | -0.19 | 0.479 | 0.10  | 0.460    | -0.97 | 0.332 |
| Diagnoses - main ICD10: M06 Other rheumatoid arthritis                                                                      | 0.22  | 0.401 | 0.54  | 0.008    | -0.97 | 0.332 |
| Diagnoses - main ICD10: D18 Haemangioma and lymphangioma, any site                                                          | 0.26  | 0.480 | -0.14 | 0.456    | 0.97  | 0.333 |
| Diagnoses - main ICD10: L82 Seborrhoeic keratosis                                                                           | 0.13  | 0.777 | -0.57 | 0.311    | 0.97  | 0.333 |
| Diagnoses - main ICD10: O47 False labour                                                                                    | 0.36  | 0.346 | -0.04 | 0.807    | 0.97  | 0.334 |
| Why reduced smoking: None of the above                                                                                      | -0.27 | 0.493 | 0.18  | 0.469    | -0.97 | 0.334 |
| Pain type(s) experienced in last month: Knee pain                                                                           | 0.05  | 0.465 | 0.12  | 0.001    | -0.97 | 0.334 |
| Treatment/medication code: logynon tablet                                                                                   | -0.32 | 0.243 | -0.03 | 0.790    | -0.96 | 0.335 |
| Treatment/medication code: asacol mr 400mg e/c tablet                                                                       | -0.03 | 0.905 | 0.26  | 0.109    | -0.96 | 0.336 |
| Reported occurrences of cancer                                                                                              | -0.42 | 0.152 | -0.12 | 0.339    | -0.96 | 0.337 |
| Non-cancer illness code, self-reported: benign breast lump                                                                  | -0.22 | 0.346 | 0.03  | 0.803    | -0.96 | 0.338 |
| Treatment/medication code: meloxicam                                                                                        | 0.45  | 0.338 | -0.06 | 0.806    | 0.96  | 0.338 |
| Non-cancer illness code, self-reported: migraine                                                                            | -0.07 | 0.470 | 0.03  | 0.503    | -0.96 | 0.339 |
| Which eye(s) affected by astigmatism: Right eye                                                                             | -0.16 | 0.409 | 0.05  | 0.632    | -0.96 | 0.339 |
| Cancer code, self-reported: testicular cancer                                                                               | -0.25 | 0.235 | -0.02 | 0.835    | -0.95 | 0.340 |

|                                                                                                                                      |       |       |       |          |       |       |
|--------------------------------------------------------------------------------------------------------------------------------------|-------|-------|-------|----------|-------|-------|
| Non-cancer illness code, self-reported: deep venous thrombosis (dvt)                                                                 | -0.05 | 0.699 | 0.09  | 0.251    | -0.95 | 0.340 |
| Non-cancer illness code, self-reported: bronchiectasis                                                                               | 0.53  | 0.123 | 0.17  | 0.273    | 0.95  | 0.340 |
| Non-cancer illness code, self-reported: allergy or anaphylactic reaction to food                                                     | -0.10 | 0.714 | 0.21  | 0.220    | -0.95 | 0.341 |
| Treatment/medication code: enalapril maleate+hydrochlorothiazide 20mg/12.5mg tablet                                                  | -0.23 | 0.366 | 0.05  | 0.738    | -0.95 | 0.341 |
| Cancer code, self-reported: basal cell carcinoma                                                                                     | -0.07 | 0.557 | -0.19 | 7.00E-04 | 0.95  | 0.341 |
| Age when periods started (menarche)                                                                                                  | 0.01  | 0.927 | -0.06 | 0.051    | 0.95  | 0.341 |
| Diagnoses - main ICD10: M10 Gout                                                                                                     | 0.21  | 0.373 | -0.06 | 0.713    | 0.95  | 0.342 |
| Impedance of arm (left)                                                                                                              | -0.02 | 0.726 | -0.07 | 0.026    | 0.95  | 0.342 |
| Impedance of arm (right)                                                                                                             | -0.02 | 0.732 | -0.07 | 0.031    | 0.95  | 0.342 |
| Treatment/medication code: spironolactone                                                                                            | 0.33  | 0.273 | -0.02 | 0.912    | 0.95  | 0.342 |
| Diagnoses - main ICD10: C62 Malignant neoplasm of testis                                                                             | -0.32 | 0.461 | 0.14  | 0.523    | -0.95 | 0.342 |
| Why stopped smoking: Financial reasons                                                                                               | -0.08 | 0.663 | 0.12  | 0.237    | -0.95 | 0.343 |
| Reason for glasses/contact lenses: For a 'squint' or 'turn' in an eye since childhood (called 'strabismus')                          | -0.17 | 0.373 | 0.03  | 0.737    | -0.95 | 0.343 |
| Blood clot, DVT, bronchitis, emphysema, asthma, rhinitis, eczema, allergy diagnosed by doctor: Hayfever, allergic rhinitis or eczema | -0.04 | 0.596 | 0.04  | 0.318    | -0.95 | 0.344 |
| Leg pain when walking uphill or hurrying                                                                                             | 0.07  | 0.734 | 0.30  | 0.011    | -0.94 | 0.345 |
| Underlying (primary) cause of death: ICD10: E85.4 Organ-limited amyloidosis                                                          | -0.35 | 0.380 | 0.06  | 0.732    | -0.94 | 0.346 |
| Cancer code, self-reported: chronic myeloid                                                                                          | -0.23 | 0.553 | 0.19  | 0.396    | -0.94 | 0.346 |
| Treatment/medication code: rizatriptan                                                                                               | 0.16  | 0.556 | -0.13 | 0.375    | 0.94  | 0.348 |
| Non-cancer illness code, self-reported: osteoporosis                                                                                 | 0.01  | 0.948 | 0.13  | 0.076    | -0.94 | 0.348 |
| Vascular/heart problems diagnosed by doctor: Stroke                                                                                  | 0.00  | 0.997 | 0.21  | 0.050    | -0.94 | 0.349 |
| Diagnoses - main ICD10: T17 Foreign body in respiratory tract                                                                        | 0.54  | 0.190 | 0.13  | 0.405    | 0.94  | 0.350 |
| Underlying (primary) cause of death: ICD10: J84.1 Other interstitial pulmonary diseases with fibrosis                                | 0.29  | 0.346 | -0.02 | 0.869    | 0.93  | 0.350 |
| Manic/hyper symptoms: None of the above                                                                                              | 0.23  | 0.283 | 0.01  | 0.946    | 0.93  | 0.350 |
| Diagnoses - main ICD10: G47 Sleep disorders                                                                                          | -0.06 | 0.704 | 0.11  | 0.240    | -0.93 | 0.350 |
| Treatment/medication code: cipralex 5mg tablet                                                                                       | -0.05 | 0.853 | 0.24  | 0.117    | -0.93 | 0.351 |
| Fractured bone site(s): Spine                                                                                                        | -0.31 | 0.286 | -0.01 | 0.920    | -0.93 | 0.351 |
| Loneliness, isolation                                                                                                                | 0.11  | 0.128 | 0.19  | 1.82E-06 | -0.93 | 0.352 |



|                                                                                                  |       |       |       |          |       |       |
|--------------------------------------------------------------------------------------------------|-------|-------|-------|----------|-------|-------|
| Non-cancer illness code, self-reported: cholelithiasis/gall stones                               | 0.03  | 0.819 | 0.18  | 0.009    | -0.93 | 0.353 |
| Diagnoses - main ICD10: T43 Poisoning by psychotropic drugs, not elsewhere classified            | -0.13 | 0.679 | 0.20  | 0.218    | -0.93 | 0.353 |
| Diagnoses - main ICD10: R14 Flatulence and related conditions                                    | -0.18 | 0.384 | 0.04  | 0.734    | -0.93 | 0.354 |
| Hand grip strength (left)                                                                        | 0.04  | 0.543 | -0.02 | 0.356    | 0.92  | 0.355 |
| Diagnoses - main ICD10: O75 Other complications of labour and delivery, not elsewhere classified | 0.27  | 0.250 | 0.03  | 0.793    | 0.92  | 0.355 |
| Treatment/medication code: co-amoxiclav                                                          | -0.07 | 0.778 | 0.21  | 0.187    | -0.92 | 0.356 |
| Qualifications: NVQ or HND or HNC or equivalent                                                  | -0.03 | 0.791 | 0.08  | 0.117    | -0.92 | 0.357 |
| Longest period of depression                                                                     | -0.05 | 0.822 | 0.17  | 0.111    | -0.92 | 0.357 |
| Diagnoses - main ICD10: L73 Other follicular disorders                                           | -0.37 | 0.540 | 0.39  | 0.489    | -0.92 | 0.358 |
| Average weekly beer plus cider intake                                                            | -0.04 | 0.617 | 0.05  | 0.345    | -0.92 | 0.358 |
| Medication for cholesterol, blood pressure or diabetes: None of the above                        | -0.06 | 0.378 | -0.14 | 0.002    | 0.92  | 0.359 |
| Diagnoses - main ICD10: O70 Perineal laceration during delivery                                  | 0.39  | 0.248 | 0.06  | 0.657    | 0.92  | 0.359 |
| Diagnoses - main ICD10: M77 Other enthesopathies                                                 | 0.34  | 0.239 | 0.05  | 0.698    | 0.92  | 0.360 |
| Treatment/medication code: nitrofurantoin                                                        | -0.13 | 0.757 | 0.49  | 0.353    | -0.91 | 0.361 |
| Treatment/medication code: amiodarone                                                            | 0.30  | 0.272 | 0.02  | 0.856    | 0.91  | 0.361 |
| Diagnoses - main ICD10: R61 Hyperhidrosis                                                        | -0.70 | 0.299 | -0.06 | 0.779    | -0.91 | 0.361 |
| Time from waking to first cigarette                                                              | 0.04  | 0.781 | -0.11 | 0.100    | 0.91  | 0.362 |
| Diagnoses - main ICD10: I45 Other conduction disorders                                           | 0.44  | 0.405 | -0.08 | 0.711    | 0.91  | 0.362 |
| Non-cancer illness code, self-reported: glaucoma                                                 | -0.18 | 0.103 | -0.07 | 0.256    | -0.91 | 0.363 |
| Adopted as a child                                                                               | 0.17  | 0.280 | 0.00  | 1.000    | 0.91  | 0.363 |
| Diagnoses - main ICD10: M47 Spondylosis                                                          | -0.19 | 0.378 | 0.04  | 0.755    | -0.91 | 0.363 |
| Treatment/medication code: indometacin                                                           | -0.63 | 0.512 | 0.34  | 0.467    | -0.91 | 0.364 |
| Treatment/medication code: co-dydramol                                                           | 0.54  | 0.113 | 0.21  | 0.134    | 0.91  | 0.364 |
| Diagnoses - main ICD10: F20 Schizophrenia                                                        | 0.15  | 0.566 | -0.12 | 0.397    | 0.91  | 0.365 |
| Ever smoked                                                                                      | -0.02 | 0.687 | 0.04  | 0.218    | -0.90 | 0.367 |
| Basal metabolic rate                                                                             | 0.06  | 0.259 | 0.11  | 2.00E-04 | -0.90 | 0.368 |
| Treatment/medication code: senna product                                                         | -0.23 | 0.531 | 0.13  | 0.444    | -0.90 | 0.369 |
| Diagnoses - main ICD10: M25 Other joint disorders, not elsewhere classified                      | -0.30 | 0.518 | 0.16  | 0.455    | -0.90 | 0.370 |
| Treatment/medication code: zydol 50mg capsule                                                    | 0.38  | 0.396 | -0.05 | 0.777    | 0.89  | 0.371 |

|                                                                                                                       |       |       |       |          |       |       |
|-----------------------------------------------------------------------------------------------------------------------|-------|-------|-------|----------|-------|-------|
| Wheeze or whistling in the chest in last year                                                                         | 0.11  | 0.085 | 0.17  | 3.00E-05 | -0.89 | 0.372 |
| Non-cancer illness code, self-reported: emphysema/chronic bronchitis                                                  | 0.34  | 0.005 | 0.20  | 0.068    | 0.89  | 0.372 |
| Leg pain when walking ever disappears while walking                                                                   | 0.16  | 0.512 | -0.09 | 0.505    | 0.89  | 0.373 |
| Headaches for 3+ months                                                                                               | 0.13  | 0.255 | 0.02  | 0.741    | 0.89  | 0.374 |
| Illnesses of mother: Heart disease                                                                                    | 0.14  | 0.172 | 0.24  | 1.33E-05 | -0.89 | 0.374 |
| Diagnoses - main ICD10: N23 Unspecified renal colic                                                                   | -0.28 | 0.501 | 0.12  | 0.484    | -0.89 | 0.376 |
| Treatment/medication code: rhinocort 50micrograms nasal spray                                                         | 0.32  | 0.117 | 0.11  | 0.281    | 0.88  | 0.377 |
| Fractured bone site(s): Ankle                                                                                         | 0.33  | 0.051 | 0.17  | 0.010    | 0.88  | 0.377 |
| Non-cancer illness code, self-reported: chronic obstructive airways disease/copd                                      | 0.18  | 0.263 | 0.02  | 0.820    | 0.88  | 0.379 |
| Diagnoses - main ICD10: N92 Excessive, frequent and irregular menstruation                                            | 0.26  | 0.133 | 0.08  | 0.467    | 0.88  | 0.379 |
| Treatment/medication code: simvastatin                                                                                | 0.07  | 0.392 | 0.15  | 6.00E-04 | -0.88 | 0.380 |
| Blood clot, DVT, bronchitis, emphysema, asthma, rhinitis, eczema, allergy diagnosed by doctor: Asthma                 | -0.01 | 0.938 | 0.07  | 0.101    | -0.88 | 0.380 |
| Treatment/medication code: sildenafil                                                                                 | -0.14 | 0.688 | 0.23  | 0.339    | -0.88 | 0.381 |
| Diagnoses - main ICD10: N76 Other inflammation of vagina and vulva                                                    | -0.09 | 0.792 | 0.31  | 0.317    | -0.88 | 0.381 |
| Diagnoses - main ICD10: I65 Occlusion and stenosis of precerebral arteries, not resulting in cerebral infarction      | -0.03 | 0.926 | 0.37  | 0.201    | -0.88 | 0.381 |
| Underlying (primary) cause of death: ICD10: C10.9 Oropharynx, unspecified                                             | 0.12  | 0.781 | -0.51 | 0.379    | 0.88  | 0.381 |
| Medication for cholesterol, blood pressure, diabetes, or take exogenous hormones: Oral contraceptive pill or minipill | -0.16 | 0.415 | 0.04  | 0.725    | -0.88 | 0.381 |
| Treatment/medication code: cozaar 25mg tablet                                                                         | -0.44 | 0.144 | -0.14 | 0.400    | -0.87 | 0.382 |
| Treatment/medication code: carbimazole                                                                                | 0.61  | 0.116 | 0.20  | 0.430    | 0.87  | 0.382 |
| Non-cancer illness code, self-reported: ulcerative colitis                                                            | 0.23  | 0.155 | 0.07  | 0.370    | 0.87  | 0.382 |
| Treatment/medication code: vitamin a                                                                                  | 0.36  | 0.251 | 0.07  | 0.573    | 0.87  | 0.383 |
| Diagnoses - main ICD10: O16 Unspecified maternal hypertension                                                         | 0.84  | 0.545 | -0.66 | 0.514    | 0.87  | 0.383 |
| Diagnoses - main ICD10: O00 Ectopic pregnancy                                                                         | 0.46  | 0.497 | -0.17 | 0.498    | 0.87  | 0.383 |
| Diagnoses - main ICD10: Z12 Special screening examination for neoplasms                                               | 0.26  | 0.403 | -0.04 | 0.790    | 0.87  | 0.383 |
| Diagnoses - main ICD10: M65 Synovitis and tenosynovitis                                                               | -0.12 | 0.523 | 0.06  | 0.509    | -0.87 | 0.384 |
| Non-cancer illness code, self-reported: renal failure requiring dialysis                                              | -0.03 | 0.909 | 0.25  | 0.142    | -0.87 | 0.384 |
| Non-cancer illness code, self-reported: venous thromboembolic disease                                                 | -0.13 | 0.706 | 0.22  | 0.294    | -0.87 | 0.385 |
| Average weekly spirits intake                                                                                         | -0.01 | 0.944 | 0.09  | 0.063    | -0.87 | 0.385 |

|                                                                                                                              |       |       |       |          |       |       |
|------------------------------------------------------------------------------------------------------------------------------|-------|-------|-------|----------|-------|-------|
| Treatment/medication code: dovonex 50micrograms/g cream                                                                      | -0.12 | 0.801 | 0.47  | 0.337    | -0.87 | 0.385 |
| Non-cancer illness code, self-reported: polycystic ovaries/polycystic ovarian syndrome                                       | -0.02 | 0.927 | 0.22  | 0.125    | -0.87 | 0.386 |
| Types of physical activity in last 4 weeks: Strenuous sports                                                                 | 0.04  | 0.613 | -0.04 | 0.360    | 0.87  | 0.386 |
| Diagnoses - main ICD10: S92 Fracture of foot, except ankle                                                                   | 0.85  | 0.374 | 0.00  | 0.993    | 0.87  | 0.387 |
| Treatment/medication code: pizotifen                                                                                         | 0.50  | 0.219 | 0.12  | 0.495    | 0.86  | 0.387 |
| Diagnoses - main ICD10: Z47 Other orthopaedic follow-up care                                                                 | -0.15 | 0.423 | 0.03  | 0.745    | -0.86 | 0.387 |
| Diagnoses - main ICD10: N49 Inflammatory disorders of male genital organs, not elsewhere classified                          | -0.30 | 0.535 | 0.17  | 0.494    | -0.86 | 0.389 |
| Diagnoses - main ICD10: E10 Insulin-dependent diabetes mellitus                                                              | 0.72  | 0.045 | 0.37  | 0.036    | 0.86  | 0.389 |
| Knee pain for 3+ months                                                                                                      | 0.02  | 0.912 | 0.16  | 0.054    | -0.86 | 0.389 |
| Home area population density - urban or rural: Scotland - Other Urban Area                                                   | -0.01 | 0.963 | 0.21  | 0.089    | -0.86 | 0.390 |
| Worry too long after embarrassment                                                                                           | 0.02  | 0.803 | 0.09  | 0.057    | -0.86 | 0.390 |
| Diagnoses - main ICD10: Z01 Other special examinations and investigations of persons without complaint or reported diagnosis | 0.54  | 0.103 | 0.23  | 0.135    | 0.86  | 0.390 |
| Treatment/medication code: codeine                                                                                           | 0.14  | 0.392 | -0.02 | 0.834    | 0.86  | 0.390 |
| Treatment/medication code: elleste-solo 1mg tablet                                                                           | 0.13  | 0.658 | -0.16 | 0.348    | 0.86  | 0.391 |
| Treatment/medication code: priadel 200mg m/r tablet                                                                          | -0.31 | 0.240 | -0.06 | 0.663    | -0.86 | 0.391 |
| Treatment/medication code: vitamin k product                                                                                 | -0.15 | 0.620 | 0.15  | 0.399    | -0.85 | 0.393 |
| Frequency of stair climbing in last 4 weeks                                                                                  | 0.09  | 0.257 | 0.02  | 0.666    | 0.85  | 0.393 |
| Non-cancer illness code, self-reported: muscle or soft tissue injuries                                                       | -0.18 | 0.485 | 0.09  | 0.623    | -0.85 | 0.393 |
| Non-cancer illness code, self-reported: polycystic kidney                                                                    | -0.36 | 0.574 | 0.33  | 0.504    | -0.85 | 0.394 |
| Arm fat-free mass (right)                                                                                                    | 0.05  | 0.323 | 0.10  | 6.00E-04 | -0.85 | 0.394 |
| Cancer code, self-reported: uterine/endometrial cancer                                                                       | -0.42 | 0.321 | -0.03 | 0.858    | -0.85 | 0.395 |
| Diagnoses - main ICD10: M24 Other specific joint derangements                                                                | -0.11 | 0.602 | 0.10  | 0.441    | -0.85 | 0.395 |
| Non-cancer illness code, self-reported: interstitial lung disease                                                            | 0.30  | 0.179 | 0.09  | 0.396    | 0.85  | 0.396 |
| Diagnoses - main ICD10: D27 Benign neoplasm of ovary                                                                         | 0.01  | 0.959 | -0.19 | 0.061    | 0.85  | 0.396 |
| Treatment/medication code: mometasone                                                                                        | -0.07 | 0.813 | 0.21  | 0.199    | -0.85 | 0.397 |
| Treatment/medication code: thyroxine sodium                                                                                  | 0.55  | 0.169 | 1.14  | 0.046    | -0.85 | 0.397 |
| Non-cancer illness code, self-reported: appendicitis                                                                         | -0.04 | 0.866 | 0.18  | 0.160    | -0.85 | 0.398 |
| Leg pain on walking                                                                                                          | 0.12  | 0.179 | 0.21  | 1.00E-04 | -0.84 | 0.400 |
| Treatment/medication code: thiamine preparation                                                                              | -0.11 | 0.600 | 0.10  | 0.447    | -0.84 | 0.401 |

|                                                                                                                      |       |       |       |          |       |       |
|----------------------------------------------------------------------------------------------------------------------|-------|-------|-------|----------|-------|-------|
| Length of longest manic/irritable episode                                                                            | 0.24  | 0.473 | -0.06 | 0.644    | 0.84  | 0.401 |
| Treatment/medication code: amitriptyline                                                                             | 0.06  | 0.634 | 0.17  | 0.012    | -0.84 | 0.402 |
| Cancer code, self-reported: breast cancer                                                                            | -0.12 | 0.344 | 0.00  | 0.948    | -0.84 | 0.403 |
| Type of tobacco currently smoked: Cigars or pipes                                                                    | -0.28 | 0.570 | 0.18  | 0.468    | -0.84 | 0.403 |
| Diagnoses - main ICD10: S61 Open wound of wrist and hand                                                             | 0.58  | 0.283 | 0.07  | 0.802    | 0.83  | 0.405 |
| Non-cancer illness code, self-reported: pericardial problem                                                          | -0.39 | 0.447 | 0.07  | 0.737    | -0.83 | 0.406 |
| Treatment/medication code: sustanon 100 oily injection                                                               | 0.35  | 0.422 | -0.04 | 0.816    | 0.83  | 0.407 |
| Diagnoses - main ICD10: C92 Myeloid leukaemia                                                                        | -0.27 | 0.510 | 0.10  | 0.559    | -0.83 | 0.407 |
| Treatment/medication code: salmeterol product                                                                        | 0.42  | 0.049 | 0.22  | 0.061    | 0.83  | 0.409 |
| Diagnoses - main ICD10: N50 Other disorders of male genital organs                                                   | 0.26  | 0.288 | 0.03  | 0.828    | 0.82  | 0.410 |
| Vitamin and mineral supplements: Vitamin E                                                                           | 0.00  | 0.994 | 0.14  | 0.076    | -0.82 | 0.410 |
| Non-cancer illness code, self-reported: iritis                                                                       | 0.19  | 0.497 | -0.07 | 0.628    | 0.82  | 0.410 |
| Illnesses of father: Prostate cancer                                                                                 | -0.06 | 0.658 | -0.19 | 0.010    | 0.82  | 0.413 |
| Reproducibility of spirometry measurement using ERS/ATS criteria                                                     | -0.01 | 0.953 | 0.11  | 0.155    | -0.81 | 0.415 |
| Treatment/medication code: cymalon cranberry 1.5g/5ml liquid                                                         | 0.33  | 0.301 | 0.05  | 0.744    | 0.81  | 0.416 |
| Past tobacco smoking                                                                                                 | 0.02  | 0.769 | -0.04 | 0.247    | 0.81  | 0.417 |
| Medication for cholesterol, blood pressure, diabetes, or take exogenous hormones:<br>Cholesterol lowering medication | 0.11  | 0.198 | 0.19  | 2.05E-05 | -0.81 | 0.418 |
| Vitamin and mineral supplements: None of the above                                                                   | -0.11 | 0.165 | -0.04 | 0.383    | -0.81 | 0.418 |
| Diagnoses - main ICD10: J35 Chronic diseases of tonsils and adenoids                                                 | 0.33  | 0.458 | -0.09 | 0.738    | 0.81  | 0.418 |
| Diagnoses - main ICD10: J18 Pneumonia, organism unspecified                                                          | -0.05 | 0.840 | 0.18  | 0.166    | -0.81 | 0.419 |
| Doctor diagnosed emphysema                                                                                           | 0.27  | 0.259 | 0.06  | 0.551    | 0.81  | 0.419 |
| Treatment/medication code: naproxen                                                                                  | 0.05  | 0.842 | 0.28  | 0.048    | -0.81 | 0.419 |
| Doctor diagnosed sarcoidosis                                                                                         | 0.70  | 0.023 | 0.41  | 0.032    | 0.81  | 0.420 |
| Diagnoses - main ICD10: L03 Cellulitis                                                                               | 0.40  | 0.058 | 0.20  | 0.143    | 0.81  | 0.420 |
| Treatment/medication code: food supplement/plant/herbal extract                                                      | 0.42  | 0.130 | 0.16  | 0.316    | 0.81  | 0.420 |
| Treatment/medication code: imigran 50mg tablet                                                                       | 0.26  | 0.198 | 0.08  | 0.459    | 0.80  | 0.421 |
| Non-cancer illness code, self-reported: fracture vertebra / crush fracture / vertebral collapse                      | -0.40 | 0.562 | 0.20  | 0.483    | -0.80 | 0.422 |
| Medication for pain relief, constipation, heartburn: Omeprazole (e.g. Zanprol)                                       | 0.08  | 0.395 | 0.16  | 2.00E-04 | -0.80 | 0.423 |
| Reason for reducing amount of alcohol drunk: Doctor's advice                                                         | -0.17 | 0.497 | 0.05  | 0.662    | -0.80 | 0.423 |

|                                                                                             |       |       |       |          |       |       |
|---------------------------------------------------------------------------------------------|-------|-------|-------|----------|-------|-------|
| Arm predicted mass (right)                                                                  | 0.05  | 0.318 | 0.10  | 7.00E-04 | -0.80 | 0.424 |
| Treatment/medication code: dovobet ointment                                                 | -0.02 | 0.953 | 0.30  | 0.181    | -0.80 | 0.424 |
| Frequency of strenuous sports in last 4 weeks                                               | 0.12  | 0.489 | -0.04 | 0.691    | 0.80  | 0.425 |
| Years of cough on most days                                                                 | -0.43 | 0.178 | -0.14 | 0.386    | -0.80 | 0.425 |
| Treatment/medication code: diclomax sr 75mg m/r capsule                                     | 0.31  | 0.255 | 0.06  | 0.666    | 0.80  | 0.426 |
| Non-cancer illness code, self-reported: iron deficiency anaemia                             | 0.00  | 0.984 | 0.17  | 0.085    | -0.79 | 0.427 |
| Treatment/medication code: celiprolol                                                       | 0.39  | 0.399 | -0.01 | 0.976    | 0.79  | 0.428 |
| Diagnoses - main ICD10: J46 Status asthmaticus                                              | -0.12 | 0.697 | 0.16  | 0.353    | -0.79 | 0.428 |
| Diagnoses - main ICD10: C15 Malignant neoplasm of oesophagus                                | 0.23  | 0.387 | 0.00  | 0.993    | 0.79  | 0.429 |
| Treatment/medication code: timolol 0.25% eye drops                                          | 1.20  | 0.452 | -0.08 | 0.784    | 0.79  | 0.430 |
| Diagnoses - main ICD10: O69 Labour and delivery complicated by umbilical cord complications | 0.54  | 0.371 | 0.04  | 0.835    | 0.79  | 0.430 |
| Diagnoses - main ICD10: K51 Ulcerative colitis                                              | 0.26  | 0.139 | 0.11  | 0.185    | 0.79  | 0.432 |
| Smoking status: Previous                                                                    | -0.02 | 0.748 | 0.04  | 0.276    | -0.78 | 0.433 |
| Treatment/medication code: isosorbide dinitrate                                             | -0.26 | 0.330 | -0.03 | 0.834    | -0.78 | 0.433 |
| Age of primiparous women at birth of child                                                  | -0.05 | 0.725 | -0.18 | 0.006    | 0.78  | 0.433 |
| Treatment/medication code: diprosalic ointment                                              | -0.19 | 0.455 | 0.03  | 0.808    | -0.78 | 0.436 |
| Diagnoses - main ICD10: C80 Malignant neoplasm without specification of site                | -0.13 | 0.622 | 0.10  | 0.483    | -0.78 | 0.436 |
| Forced vital capacity (FVC), Best measure                                                   | -0.07 | 0.165 | -0.03 | 0.282    | -0.78 | 0.437 |
| Illnesses of siblings: Parkinson's disease                                                  | -0.91 | 0.375 | -0.08 | 0.790    | -0.78 | 0.437 |
| Non-cancer illness code, self-reported: measles / morbillivirus                             | 0.07  | 0.809 | -0.20 | 0.256    | 0.78  | 0.437 |
| Diagnoses - main ICD10: N36 Other disorders of urethra                                      | -0.30 | 0.492 | 0.07  | 0.715    | -0.78 | 0.438 |
| Non-cancer illness code, self-reported: asthma                                              | 0.01  | 0.906 | 0.07  | 0.077    | -0.78 | 0.438 |
| Treatment/medication code: amantadine                                                       | 0.04  | 0.929 | -0.41 | 0.319    | 0.78  | 0.438 |
| Treatment/medication code: celecoxib                                                        | 0.04  | 0.928 | 0.60  | 0.305    | -0.78 | 0.438 |
| Illnesses of father: Parkinson's disease                                                    | 0.15  | 0.569 | -0.08 | 0.554    | 0.77  | 0.439 |
| Illnesses of mother: High blood pressure                                                    | 0.16  | 0.077 | 0.08  | 0.099    | 0.77  | 0.441 |
| Underlying (primary) cause of death: ICD10: I73.9 Peripheral vascular disease, unspecified  | 0.59  | 0.218 | 0.19  | 0.361    | 0.77  | 0.441 |
| Illnesses of mother: Severe depression                                                      | 0.04  | 0.787 | 0.16  | 0.019    | -0.77 | 0.442 |
| Treatment/medication code: xalacom 0.005%/0.5% eye drops                                    | -0.16 | 0.406 | 0.01  | 0.956    | -0.77 | 0.443 |

|                                                                                                 |       |       |       |          |       |       |
|-------------------------------------------------------------------------------------------------|-------|-------|-------|----------|-------|-------|
| Diagnoses - main ICD10: J90 Pleural effusion, not elsewhere classified                          | -0.70 | 0.396 | -0.05 | 0.798    | -0.77 | 0.443 |
| Diagnoses - main ICD10: S62 Fracture at wrist and hand level                                    | -0.01 | 0.960 | 0.23  | 0.121    | -0.77 | 0.444 |
| Treatment/medication code: lisinopril                                                           | 0.12  | 0.258 | 0.02  | 0.726    | 0.77  | 0.444 |
| Non-cancer illness code, self-reported: hypopituitarism                                         | 0.14  | 0.710 | 0.49  | 0.080    | -0.76 | 0.444 |
| Diagnoses - main ICD10: J86 Pyothorax                                                           | 0.36  | 0.370 | 0.02  | 0.934    | 0.76  | 0.445 |
| Diagnoses - main ICD10: R19 Other symptoms and signs involving the digestive system and abdomen | -0.18 | 0.715 | 0.26  | 0.393    | -0.76 | 0.445 |
| Non-cancer illness code, self-reported: hepatitis b                                             | -0.41 | 0.192 | -0.14 | 0.378    | -0.76 | 0.445 |
| Treatment/medication code: glyceryl trinitrate                                                  | 0.08  | 0.811 | 0.40  | 0.100    | -0.76 | 0.446 |
| Treatment/medication code: atenolol                                                             | 0.23  | 0.030 | 0.13  | 0.069    | 0.76  | 0.446 |
| Treatment/medication code: mirapexin 0.088mg tablet                                             | 0.63  | 0.183 | 0.19  | 0.590    | 0.76  | 0.449 |
| Diagnoses - main ICD10: Z35 Supervision of high-risk pregnancy                                  | 0.28  | 0.269 | 0.06  | 0.696    | 0.76  | 0.449 |
| Underlying (primary) cause of death: ICD10: C66 Malignant neoplasm of ureter                    | 0.19  | 0.525 | -0.06 | 0.660    | 0.76  | 0.449 |
| Diabetes diagnosed by doctor                                                                    | 0.12  | 0.104 | 0.18  | 1.61E-05 | -0.76 | 0.450 |
| Worrier / anxious feelings                                                                      | 0.03  | 0.653 | 0.10  | 0.051    | -0.75 | 0.451 |
| Diagnoses - main ICD10: G24 Dystonia                                                            | 0.44  | 0.508 | -0.11 | 0.717    | 0.75  | 0.451 |
| Diagnoses - main ICD10: L90 Atrophic disorders of skin                                          | -0.52 | 0.506 | 0.10  | 0.698    | -0.75 | 0.451 |
| Mineral and other dietary supplements: Calcium                                                  | -0.01 | 0.917 | 0.07  | 0.149    | -0.75 | 0.451 |
| Non-cancer illness code, self-reported: ovarian cyst or cysts                                   | -0.09 | 0.796 | 0.25  | 0.362    | -0.75 | 0.452 |
| Non-cancer illness code, self-reported: liver failure/cirrhosis                                 | 0.32  | 0.263 | 0.08  | 0.545    | 0.75  | 0.453 |
| Treatment/medication code: beclomethasone                                                       | -0.26 | 0.503 | 0.10  | 0.723    | -0.75 | 0.453 |
| Non-cancer illness code, self-reported: high cholesterol                                        | 0.10  | 0.194 | 0.16  | 1.00E-04 | -0.75 | 0.453 |
| Vascular/heart problems diagnosed by doctor: Angina                                             | 0.11  | 0.225 | 0.18  | 4.45E-05 | -0.75 | 0.454 |
| Diagnoses - main ICD10: A87 Viral meningitis                                                    | 0.25  | 0.535 | -0.09 | 0.669    | 0.75  | 0.454 |
| Illnesses of mother: Lung cancer                                                                | -0.12 | 0.530 | 0.04  | 0.677    | -0.75 | 0.455 |
| Non-cancer illness code, self-reported: fracture upper arm / humerus / elbow                    | -0.07 | 0.787 | 0.15  | 0.255    | -0.75 | 0.455 |
| Cancer code, self-reported: oesophageal cancer                                                  | 0.21  | 0.576 | -0.10 | 0.570    | 0.74  | 0.457 |
| Treatment/medication code: estradot 25micrograms patch                                          | -0.24 | 0.671 | 0.28  | 0.495    | -0.74 | 0.457 |
| Number of full brothers                                                                         | -0.02 | 0.831 | 0.06  | 0.272    | -0.74 | 0.458 |
| Diagnoses - main ICD10: H81 Disorders of vestibular function                                    | -0.30 | 0.673 | 0.32  | 0.466    | -0.74 | 0.458 |

|                                                                                                                |       |       |       |          |       |       |
|----------------------------------------------------------------------------------------------------------------|-------|-------|-------|----------|-------|-------|
| Medication for cholesterol, blood pressure, diabetes, or take exogenous hormones:<br>Blood pressure medication | 0.17  | 0.024 | 0.10  | 0.068    | 0.74  | 0.458 |
| Diagnoses - main ICD10: S30 Superficial injury of abdomen, lower back and pelvis                               | -0.24 | 0.507 | 0.06  | 0.740    | -0.74 | 0.458 |
| Diagnoses - main ICD10: N83 Noninflammatory disorders of ovary, Fallopian tube and<br>broad ligament           | 0.43  | 0.328 | 0.04  | 0.900    | 0.74  | 0.459 |
| Cancer diagnosed by doctor                                                                                     | -0.01 | 0.933 | -0.14 | 0.088    | 0.74  | 0.460 |
| Non-cancer illness code, self-reported: bowel / intestinal obstruction                                         | 0.35  | 0.509 | -0.08 | 0.738    | 0.74  | 0.460 |
| Standing height                                                                                                | 0.04  | 0.331 | 0.01  | 0.775    | 0.74  | 0.461 |
| Diagnoses - main ICD10: I63 Cerebral infarction                                                                | -0.01 | 0.983 | 0.24  | 0.113    | -0.74 | 0.461 |
| Diagnoses - main ICD10: O68 Labour and delivery complicated by foetal stress<br>[distress]                     | 0.10  | 0.724 | -0.13 | 0.365    | 0.74  | 0.462 |
| Underlying (primary) cause of death: ICD10: C23 Malignant neoplasm of gallbladder                              | -0.20 | 0.375 | -0.01 | 0.951    | -0.74 | 0.462 |
| Non-cancer illness code, self-reported: diabetes                                                               | 0.12  | 0.116 | 0.18  | 2.35E-05 | -0.74 | 0.462 |
| Diagnoses - main ICD10: J44 Other chronic obstructive pulmonary disease                                        | 0.32  | 0.064 | 0.18  | 0.073    | 0.73  | 0.466 |
| Treatment/medication code: ventolin 100micrograms inhaler                                                      | -0.07 | 0.500 | 0.01  | 0.781    | -0.73 | 0.467 |
| Current employment status: Unemployed                                                                          | 0.01  | 0.937 | 0.15  | 0.091    | -0.73 | 0.467 |
| Diagnoses - main ICD10: K86 Other diseases of pancreas                                                         | -0.07 | 0.791 | 0.13  | 0.246    | -0.72 | 0.471 |
| Treatment/medication code: viagra 50mg tablet                                                                  | -0.31 | 0.658 | 0.35  | 0.555    | -0.72 | 0.472 |
| Treatment/medication code: metronidazole product                                                               | 0.00  | 0.993 | 0.30  | 0.266    | -0.72 | 0.472 |
| Diagnoses - main ICD10: K40 Inguinal hernia                                                                    | -0.04 | 0.705 | 0.05  | 0.468    | -0.72 | 0.473 |
| Likelihood of resuming smoking                                                                                 | 0.17  | 0.418 | 0.00  | 0.995    | 0.72  | 0.473 |
| Diagnoses - main ICD10: C43 Malignant melanoma of skin                                                         | 0.12  | 0.722 | -0.16 | 0.393    | 0.72  | 0.473 |
| Treatment/medication code: zimovane ls 3.75mg tablet                                                           | -0.20 | 0.663 | 0.16  | 0.446    | -0.72 | 0.473 |
| Treatment/medication code: aminophylline                                                                       | -0.20 | 0.370 | -0.02 | 0.820    | -0.72 | 0.473 |
| Treatment/medication code: norgeston tablet                                                                    | -0.23 | 0.612 | 0.14  | 0.559    | -0.72 | 0.473 |
| Treatment/medication code: leflunomide                                                                         | -0.38 | 0.314 | -0.08 | 0.677    | -0.72 | 0.474 |
| Treatment/medication code: serevent 25mcg inhaler                                                              | 0.31  | 0.159 | 0.14  | 0.177    | 0.71  | 0.475 |
| Treatment/medication code: paracetamol                                                                         | 0.12  | 0.108 | 0.18  | 1.21E-06 | -0.71 | 0.477 |
| Non-cancer illness code, self-reported: leg claudication/ intermittent claudication                            | -0.05 | 0.806 | 0.12  | 0.298    | -0.71 | 0.478 |
| Treatment/medication code: furosemide                                                                          | 0.06  | 0.785 | 0.25  | 0.135    | -0.71 | 0.478 |
| Treatment/medication code: vitamin b6 preparation                                                              | 0.03  | 0.906 | -0.17 | 0.172    | 0.71  | 0.478 |

|                                                                                                                 |       |       |       |          |       |       |
|-----------------------------------------------------------------------------------------------------------------|-------|-------|-------|----------|-------|-------|
| Eye problems/disorders: Glaucoma                                                                                | -0.16 | 0.166 | -0.07 | 0.240    | -0.71 | 0.479 |
| Hearing difficulty/problems with background noise                                                               | 0.06  | 0.398 | 0.11  | 5.00E-04 | -0.71 | 0.480 |
| Non-cancer illness code, self-reported: anal problem                                                            | 0.81  | 0.399 | 0.11  | 0.592    | 0.71  | 0.480 |
| Treatment/medication code: perindopril+indapamide                                                               | -0.14 | 0.794 | 0.33  | 0.401    | -0.71 | 0.481 |
| Treatment/medication code: sodium cromoglicate                                                                  | 0.26  | 0.295 | 0.07  | 0.564    | 0.71  | 0.481 |
| Treatment/medication code: atrovent 20micrograms inhaler                                                        | 0.34  | 0.214 | 0.13  | 0.285    | 0.70  | 0.481 |
| Non-cancer illness code, self-reported: inguinal hernia                                                         | -0.14 | 0.616 | 0.09  | 0.603    | -0.70 | 0.483 |
| Non-cancer illness code, self-reported: liver/biliary/pancreas problem                                          | 0.07  | 0.785 | 0.27  | 0.078    | -0.70 | 0.483 |
| Treatment/medication code: climaval 1mg tablet                                                                  | 0.06  | 0.847 | -0.20 | 0.277    | 0.70  | 0.483 |
| Diagnoses - main ICD10: I50 Heart failure                                                                       | -0.12 | 0.650 | 0.09  | 0.499    | -0.70 | 0.483 |
| Treatment/medication code: lactulose product                                                                    | 0.11  | 0.712 | 0.34  | 0.048    | -0.70 | 0.483 |
| Vitamin and mineral supplements: Vitamin A                                                                      | 0.41  | 0.064 | 0.22  | 0.131    | 0.70  | 0.484 |
| Treatment/medication code: warfarin                                                                             | 0.36  | 0.060 | 0.21  | 0.021    | 0.70  | 0.484 |
| Reason former drinker stopped drinking alcohol: Doctor's advice                                                 | -0.03 | 0.931 | 0.28  | 0.247    | -0.70 | 0.485 |
| Doctor diagnosed tuberculosis                                                                                   | 0.45  | 0.208 | 0.17  | 0.321    | 0.70  | 0.486 |
| Diagnoses - main ICD10: N20 Calculus of kidney and ureter                                                       | -0.11 | 0.423 | 0.00  | 0.980    | -0.70 | 0.486 |
| Treatment/medication code: lansoprazole                                                                         | 0.08  | 0.510 | 0.16  | 0.002    | -0.70 | 0.486 |
| Bilateral oophorectomy (both ovaries removed)                                                                   | -0.09 | 0.434 | 0.00  | 0.988    | -0.70 | 0.487 |
| Treatment/medication code: nexium 20mg tablet                                                                   | 0.28  | 0.369 | 0.05  | 0.712    | 0.69  | 0.489 |
| Treatment/medication code: nasonex 0.05% aqueous nasal spray                                                    | -0.09 | 0.728 | 0.10  | 0.402    | -0.69 | 0.490 |
| Diagnoses - main ICD10: N94 Pain and other conditions associated with female genital organs and menstrual cycle | 0.57  | 0.559 | -0.17 | 0.705    | 0.69  | 0.491 |
| Illness, injury, bereavement, stress in last 2 years: Death of a spouse or partner                              | -0.03 | 0.904 | 0.17  | 0.174    | -0.69 | 0.492 |
| Diagnoses - main ICD10: M50 Cervical disk disorders                                                             | -0.23 | 0.454 | 0.01  | 0.950    | -0.69 | 0.492 |
| Non-cancer illness code, self-reported: testicular problems (not cancer)                                        | 0.47  | 0.169 | 0.20  | 0.252    | 0.69  | 0.493 |
| Non-cancer illness code, self-reported: peritonitis                                                             | 0.37  | 0.090 | 0.20  | 0.068    | 0.69  | 0.493 |
| Underlying (primary) cause of death: ICD10: K63.1 Perforation of intestine (nontraumatic)                       | 0.16  | 0.693 | -0.15 | 0.454    | 0.68  | 0.494 |
| Pain type(s) experienced in last month: Neck or shoulder pain                                                   | 0.11  | 0.116 | 0.17  | 6.22E-07 | -0.68 | 0.495 |
| Treatment/medication code: qvar 50 inhaler                                                                      | 0.16  | 0.701 | -0.18 | 0.514    | 0.68  | 0.497 |
| Manic/hyper symptoms: All of the above                                                                          | 0.20  | 0.466 | -0.01 | 0.935    | 0.68  | 0.497 |



|                                                                                                           |       |       |       |          |       |       |
|-----------------------------------------------------------------------------------------------------------|-------|-------|-------|----------|-------|-------|
| Treatment/medication code: phenytoin                                                                      | -0.14 | 0.491 | 0.01  | 0.898    | -0.68 | 0.498 |
| Treatment/medication code: depakote 250mg e/c tablet                                                      | 0.99  | 0.409 | 0.15  | 0.611    | 0.68  | 0.498 |
| Mother's age at death                                                                                     | -0.03 | 0.800 | -0.12 | 0.116    | 0.68  | 0.499 |
| Illnesses of father: Diabetes                                                                             | 0.16  | 0.130 | 0.08  | 0.242    | 0.68  | 0.499 |
| Treatment/medication code: dipyridamole                                                                   | 0.23  | 0.355 | 0.04  | 0.749    | 0.68  | 0.499 |
| Fluid intelligence score                                                                                  | -0.02 | 0.738 | -0.06 | 0.046    | 0.68  | 0.499 |
| Non-cancer illness code, self-reported: pernicious anaemia                                                | 0.54  | 0.025 | 0.36  | 0.007    | 0.68  | 0.500 |
| Leg fat-free mass (left)                                                                                  | 0.06  | 0.201 | 0.10  | 5.00E-04 | -0.68 | 0.500 |
| Home area population density - urban or rural: England/Wales - Town and Fringe - less sparse              | 0.56  | 0.611 | -0.37 | 0.655    | 0.67  | 0.500 |
| Treatment/medication code: spasmonal 60mg capsule                                                         | 0.39  | 0.374 | 0.07  | 0.687    | 0.67  | 0.500 |
| Non-cancer illness code, self-reported: cervical polyps                                                   | -0.42 | 0.491 | 0.01  | 0.964    | -0.67 | 0.501 |
| Distance between home and job workplace                                                                   | 0.11  | 0.480 | -0.01 | 0.889    | 0.67  | 0.501 |
| Treatment/medication code: ginkgo forte tablet                                                            | -0.13 | 0.606 | 0.06  | 0.637    | -0.67 | 0.503 |
| Diagnoses - main ICD10: I42 Cardiomyopathy                                                                | -0.05 | 0.835 | 0.12  | 0.270    | -0.67 | 0.504 |
| Treatment/medication code: iron sulphate                                                                  | 0.35  | 0.361 | 0.07  | 0.702    | 0.67  | 0.505 |
| Diagnoses - main ICD10: J02 Acute pharyngitis                                                             | -0.20 | 0.718 | 0.37  | 0.570    | -0.67 | 0.505 |
| Non-cancer illness code, self-reported: stomach disorder                                                  | 0.54  | 0.260 | 0.20  | 0.269    | 0.67  | 0.505 |
| Medication for cholesterol, blood pressure, diabetes, or take exogenous hormones: Insulin                 | 0.28  | 0.089 | 0.41  | 2.99E-05 | -0.67 | 0.506 |
| Non-cancer illness code, self-reported: pituitary adenoma/tumour                                          | 0.31  | 0.597 | -0.13 | 0.664    | 0.67  | 0.506 |
| Impedance of whole body                                                                                   | -0.04 | 0.437 | -0.08 | 0.024    | 0.66  | 0.506 |
| Non-cancer illness code, self-reported: labyrinthitis                                                     | 0.22  | 0.709 | -0.32 | 0.570    | 0.66  | 0.507 |
| Why stopped smoking: Doctor's advice                                                                      | 0.24  | 0.212 | 0.10  | 0.247    | 0.66  | 0.507 |
| Diagnoses - main ICD10: N47 Redundant prepuce, phimosis and paraphimosis                                  | 0.51  | 0.289 | 0.16  | 0.413    | 0.66  | 0.509 |
| Underlying (primary) cause of death: ICD10: G31.8 Other specified degenerative diseases of nervous system | -0.13 | 0.775 | -0.75 | 0.362    | 0.66  | 0.509 |
| Diagnoses - main ICD10: O36 Maternal care for other known or suspected foetal problems                    | 0.10  | 0.733 | -0.12 | 0.427    | 0.66  | 0.511 |
| Treatment/medication code: letrozole                                                                      | 0.38  | 0.102 | 0.21  | 0.080    | 0.66  | 0.512 |
| Treatment/medication code: pariet 10mg e/c tablet                                                         | -0.10 | 0.781 | 0.17  | 0.372    | -0.66 | 0.512 |

|                                                                                                              |       |       |       |       |       |       |
|--------------------------------------------------------------------------------------------------------------|-------|-------|-------|-------|-------|-------|
| Treatment/medication code: adcal 600mg chewable tablet                                                       | 0.07  | 0.818 | -0.16 | 0.345 | 0.66  | 0.512 |
| Treatment/medication code: synalar 1:10 cream                                                                | -0.25 | 0.665 | 0.19  | 0.576 | -0.66 | 0.512 |
| Manic/hyper symptoms: I was more active than usual                                                           | -0.21 | 0.409 | -0.03 | 0.769 | -0.65 | 0.513 |
| Treatment/medication code: adizem-xl plus m/r capsule                                                        | 0.42  | 0.357 | 0.10  | 0.639 | 0.65  | 0.513 |
| Non-cancer illness code, self-reported: hypertrophic cardiomyopathy (hcm / hocm)                             | 0.08  | 0.793 | -0.14 | 0.329 | 0.65  | 0.514 |
| Doctor diagnosed COPD (chronic obstructive pulmonary disease)                                                | 0.33  | 0.223 | 0.13  | 0.298 | 0.65  | 0.514 |
| Diagnoses - main ICD10: Z80 Family history of malignant neoplasm                                             | 0.23  | 0.516 | -0.03 | 0.878 | 0.65  | 0.514 |
| Diagnoses - main ICD10: S76 Injury of muscle and tendon at hip and thigh level                               | -0.35 | 0.279 | -0.12 | 0.400 | -0.65 | 0.514 |
| Treatment/medication code: cardura 1mg tablet                                                                | -0.21 | 0.409 | -0.02 | 0.857 | -0.65 | 0.515 |
| Diagnoses - main ICD10: R54 Senility                                                                         | -0.37 | 0.425 | -0.02 | 0.924 | -0.65 | 0.516 |
| Diagnoses - main ICD10: J13 Pneumonia due to Streptococcus pneumoniae                                        | -0.43 | 0.530 | 0.05  | 0.856 | -0.65 | 0.516 |
| Treatment/medication code: hyoscine butylbromide                                                             | 0.05  | 0.797 | 0.21  | 0.064 | -0.65 | 0.516 |
| Non-cancer illness code, self-reported: abnormal smear (cervix)                                              | 0.45  | 0.559 | -0.09 | 0.775 | 0.65  | 0.517 |
| Diagnoses - main ICD10: K59 Other functional intestinal disorders                                            | 0.06  | 0.849 | 0.33  | 0.161 | -0.65 | 0.517 |
| Non-cancer illness code, self-reported: gestational hypertension/pre-eclampsia                               | 0.30  | 0.213 | 0.13  | 0.264 | 0.65  | 0.518 |
| Diagnoses - main ICD10: M53 Other dorsopathies, not elsewhere classified                                     | 0.20  | 0.386 | 0.03  | 0.744 | 0.65  | 0.518 |
| Hearing aid user                                                                                             | 0.03  | 0.783 | 0.12  | 0.038 | -0.65 | 0.518 |
| Current employment status: Doing unpaid or voluntary work                                                    | 0.06  | 0.627 | -0.03 | 0.645 | 0.65  | 0.518 |
| Non-cancer illness code, self-reported: fracture lower leg / ankle                                           | -0.57 | 0.627 | 0.25  | 0.604 | -0.65 | 0.519 |
| Treatment/medication code: brimonidine tartrate                                                              | -0.09 | 0.832 | 0.26  | 0.438 | -0.64 | 0.519 |
| Non-cancer illness code, self-reported: pyloric stenosis                                                     | 0.17  | 0.413 | 0.02  | 0.879 | 0.64  | 0.519 |
| Non-cancer illness code, self-reported: fibrosing alveolitis/unspecified alveolitis                          | 0.42  | 0.345 | 0.11  | 0.552 | 0.64  | 0.520 |
| Diagnoses - main ICD10: M51 Other intervertebral disk disorders                                              | 0.06  | 0.717 | 0.19  | 0.041 | -0.64 | 0.521 |
| Treatment/medication code: bisoprolol                                                                        | 0.04  | 0.786 | 0.15  | 0.042 | -0.64 | 0.522 |
| Diagnoses - main ICD10: M18 Arthrosis of first carpometacarpal joint                                         | -0.03 | 0.894 | 0.15  | 0.243 | -0.64 | 0.522 |
| Tinnitus: Yes, but not now, but have in the past                                                             | 0.26  | 0.088 | 0.15  | 0.099 | 0.64  | 0.522 |
| Fractured bone site(s): Leg                                                                                  | 0.33  | 0.159 | 0.17  | 0.116 | 0.64  | 0.522 |
| Underlying (primary) cause of death: ICD10: I11.0 Hypertensive heart disease with (congestive) heart failure | -0.25 | 0.512 | 0.01  | 0.941 | -0.64 | 0.522 |
| Diagnoses - main ICD10: F33 Recurrent depressive disorder                                                    | 0.58  | 0.500 | 0.00  | 0.985 | 0.64  | 0.522 |

|                                                                                                                  |       |       |       |          |       |       |
|------------------------------------------------------------------------------------------------------------------|-------|-------|-------|----------|-------|-------|
| Treatment/medication code: pilocarpine                                                                           | -0.18 | 0.357 | -0.04 | 0.654    | -0.64 | 0.522 |
| Diagnoses - main ICD10: R50 Fever of unknown origin                                                              | 0.01  | 0.979 | 0.17  | 0.129    | -0.64 | 0.522 |
| Illnesses of mother: Stroke                                                                                      | 0.22  | 0.206 | 0.09  | 0.351    | 0.64  | 0.523 |
| Treatment/medication code: calcium+ergocalciferol tablet                                                         | 0.12  | 0.774 | -0.21 | 0.488    | 0.64  | 0.524 |
| Diagnoses - main ICD10: C67 Malignant neoplasm of bladder                                                        | 0.06  | 0.794 | -0.11 | 0.410    | 0.64  | 0.525 |
| Non-cancer illness code, self-reported: spontaneous pneumothorax/recurrent pneumothorax                          | -0.09 | 0.735 | 0.10  | 0.468    | -0.63 | 0.526 |
| Diagnoses - main ICD10: C61 Malignant neoplasm of prostate                                                       | 0.18  | 0.283 | 0.06  | 0.436    | 0.63  | 0.526 |
| Number of days/week of vigorous physical activity 10+ minutes                                                    | 0.03  | 0.748 | -0.03 | 0.436    | 0.63  | 0.527 |
| Bipolar disorder status                                                                                          | -0.01 | 0.967 | 0.20  | 0.256    | -0.63 | 0.527 |
| Non-cancer illness code, self-reported: femoral hernia                                                           | 0.47  | 0.303 | 0.16  | 0.398    | 0.63  | 0.527 |
| Diagnoses - main ICD10: O32 Maternal care for known or suspected malpresentation of foetus                       | 0.07  | 0.812 | -0.16 | 0.403    | 0.63  | 0.528 |
| Doctor diagnosed asthma                                                                                          | -0.07 | 0.473 | 0.00  | 0.987    | -0.63 | 0.529 |
| Diagnoses - main ICD10: G50 Disorders of trigeminal nerve                                                        | -0.62 | 0.526 | 0.01  | 0.953    | -0.63 | 0.529 |
| Leg predicted mass (left)                                                                                        | 0.06  | 0.184 | 0.10  | 5.00E-04 | -0.63 | 0.529 |
| Treatment/medication code: climagest 1mg tablet                                                                  | -0.99 | 0.562 | 0.10  | 0.743    | -0.63 | 0.530 |
| Cancer code, self-reported: eye and/or adnexal cancer                                                            | -0.09 | 0.729 | 0.10  | 0.467    | -0.63 | 0.531 |
| Non-cancer illness code, self-reported: atrial fibrillation                                                      | 0.08  | 0.620 | -0.03 | 0.684    | 0.62  | 0.533 |
| Treatment/medication code: budesonide                                                                            | 0.20  | 0.485 | 0.00  | 0.981    | 0.62  | 0.533 |
| Treatment/medication code: bimatoprost                                                                           | -0.44 | 0.273 | -0.17 | 0.307    | -0.62 | 0.534 |
| Treatment/medication code: co-tenidone                                                                           | 0.28  | 0.317 | 0.09  | 0.516    | 0.62  | 0.534 |
| Cancer code, self-reported: skin cancer                                                                          | 0.31  | 0.573 | -0.05 | 0.786    | 0.62  | 0.534 |
| Treatment/medication code: chlorphenamine                                                                        | -0.34 | 0.115 | -0.19 | 0.047    | -0.62 | 0.536 |
| Underlying (primary) cause of death: ICD10: C78.6 Secondary malignant neoplasm of retroperitoneum and peritoneum | -0.24 | 0.359 | -0.06 | 0.682    | -0.62 | 0.536 |
| Underlying (primary) cause of death: ICD10: N39.0 Urinary tract infection, site not specified                    | -0.32 | 0.448 | -0.03 | 0.888    | -0.62 | 0.536 |
| Treatment/medication code: rabeprazole sodium                                                                    | 0.32  | 0.488 | 0.01  | 0.950    | 0.62  | 0.536 |
| Diagnoses - main ICD10: N40 Hyperplasia of prostate                                                              | 0.15  | 0.385 | 0.03  | 0.728    | 0.62  | 0.536 |
| Diagnoses - main ICD10: Z44 Fitting and adjustment of external prosthetic device                                 | 1.09  | 0.478 | 0.12  | 0.666    | 0.62  | 0.537 |

|                                                                                                                                                  |       |       |       |          |       |       |
|--------------------------------------------------------------------------------------------------------------------------------------------------|-------|-------|-------|----------|-------|-------|
| Reason for glasses/contact lenses: For short-sightedness, i.e. only or mainly for distance viewing such as driving, cinema etc (called 'myopia') | 0.02  | 0.800 | -0.04 | 0.411    | 0.62  | 0.538 |
| Maximum workload during fitness test                                                                                                             | 0.02  | 0.915 | -0.09 | 0.252    | 0.62  | 0.538 |
| Illnesses of mother: None of the above (group 1)                                                                                                 | -0.24 | 0.020 | -0.17 | 8.00E-04 | -0.61 | 0.539 |
| Non-cancer illness code, self-reported: hereditary/genetic haematological disorder                                                               | -0.02 | 0.948 | 0.21  | 0.242    | -0.61 | 0.541 |
| Diagnoses - main ICD10: H53 Visual disturbances                                                                                                  | 0.07  | 0.693 | 0.20  | 0.047    | -0.61 | 0.542 |
| Diagnoses - main ICD10: G56 Mononeuropathies of upper limb                                                                                       | 0.09  | 0.388 | 0.16  | 7.00E-04 | -0.61 | 0.542 |
| Illnesses of siblings: Diabetes                                                                                                                  | 0.07  | 0.475 | 0.15  | 0.015    | -0.61 | 0.542 |
| Treatment/medication code: protopic 0.03% ointment                                                                                               | -0.25 | 0.746 | 0.38  | 0.585    | -0.61 | 0.543 |
| Non-cancer illness code, self-reported: varicose veins                                                                                           | -0.08 | 0.646 | 0.04  | 0.647    | -0.61 | 0.544 |
| Treatment/medication code: omacor 1g capsule                                                                                                     | 0.37  | 0.601 | -0.10 | 0.751    | 0.61  | 0.545 |
| Diagnoses - main ICD10: K09 Cysts of oral region, not elsewhere classified                                                                       | -0.10 | 0.857 | 0.34  | 0.472    | -0.60 | 0.546 |
| Gestational diabetes only                                                                                                                        | -0.37 | 0.436 | -0.06 | 0.759    | -0.60 | 0.546 |
| Treatment/medication code: phenoxymethylpenicillin                                                                                               | -0.42 | 0.561 | 0.05  | 0.863    | -0.60 | 0.546 |
| Part of a multiple birth                                                                                                                         | 0.05  | 0.854 | -0.14 | 0.371    | 0.60  | 0.546 |
| Cochlear implant                                                                                                                                 | 0.16  | 0.622 | 0.40  | 0.089    | -0.60 | 0.547 |
| Non-cancer illness code, self-reported: eczema/dermatitis                                                                                        | -0.02 | 0.906 | 0.08  | 0.325    | -0.60 | 0.548 |
| Reason for glasses/contact lenses: Other eye condition                                                                                           | 0.11  | 0.759 | -0.14 | 0.504    | 0.60  | 0.548 |
| Diagnoses - main ICD10: G58 Other mononeuropathies                                                                                               | 0.45  | 0.521 | 0.01  | 0.982    | 0.60  | 0.548 |
| Treatment/medication code: buscopan 10mg tablet                                                                                                  | 0.01  | 0.977 | 0.28  | 0.298    | -0.60 | 0.548 |
| Current tobacco smoking                                                                                                                          | 0.01  | 0.882 | 0.06  | 0.180    | -0.60 | 0.549 |
| Treatment/medication code: diazepam                                                                                                              | 0.02  | 0.913 | 0.17  | 0.150    | -0.60 | 0.549 |
| Diagnoses - main ICD10: N81 Female genital prolapse                                                                                              | 0.17  | 0.222 | 0.08  | 0.275    | 0.60  | 0.549 |
| Treatment/medication code: colchicine                                                                                                            | -0.14 | 0.543 | 0.01  | 0.904    | -0.60 | 0.550 |
| Whole body fat-free mass                                                                                                                         | 0.06  | 0.225 | 0.09  | 6.00E-04 | -0.60 | 0.550 |
| Former alcohol drinker                                                                                                                           | -0.11 | 0.412 | -0.02 | 0.773    | -0.60 | 0.550 |
| Diagnoses - main ICD10: N30 Cystitis                                                                                                             | 0.42  | 0.393 | 0.10  | 0.607    | 0.60  | 0.550 |
| Treatment/medication code: minims artificial tears single-use eye drops                                                                          | 0.42  | 0.332 | 0.14  | 0.451    | 0.60  | 0.551 |
| Diagnoses - main ICD10: S00 Superficial injury of head                                                                                           | 0.36  | 0.559 | -0.03 | 0.894    | 0.60  | 0.552 |
| Diagnoses - main ICD10: Z46 Fitting and adjustment of other devices                                                                              | 0.00  | 0.985 | 0.13  | 0.221    | -0.60 | 0.552 |

|                                                                                         |       |       |       |          |       |       |
|-----------------------------------------------------------------------------------------|-------|-------|-------|----------|-------|-------|
| Non-cancer illness code, self-reported: osteoarthritis                                  | 0.11  | 0.301 | 0.17  | 4.00E-04 | -0.59 | 0.553 |
| Treatment/medication code: amitriptyline hydrochloride+perphenazine 10mg/2mg tablet     | -0.12 | 0.717 | 0.10  | 0.518    | -0.59 | 0.554 |
| Non-cancer illness code, self-reported: angina                                          | 0.12  | 0.170 | 0.18  | 7.37E-05 | -0.59 | 0.554 |
| Treatment/medication code: bendrofluazide                                               | 0.18  | 0.253 | 0.07  | 0.509    | 0.59  | 0.556 |
| Treatment/medication code: prempak 0.625 tablet                                         | 0.53  | 0.343 | 0.18  | 0.396    | 0.59  | 0.556 |
| Non-cancer illness code, self-reported: pericarditis                                    | 0.01  | 0.970 | 0.19  | 0.217    | -0.59 | 0.557 |
| Diagnoses - main ICD10: Z34 Supervision of normal pregnancy                             | 0.20  | 0.568 | -0.03 | 0.872    | 0.59  | 0.558 |
| Hair/balding pattern: Pattern 4                                                         | 0.08  | 0.124 | 0.05  | 0.089    | 0.58  | 0.559 |
| Non-cancer illness code, self-reported: pneumonia                                       | 0.21  | 0.321 | 0.07  | 0.453    | 0.58  | 0.559 |
| Treatment/medication code: fentanyl                                                     | -0.05 | 0.871 | 0.16  | 0.309    | -0.58 | 0.560 |
| Heel bone mineral density (BMD) T-score, automated                                      | 0.01  | 0.884 | -0.03 | 0.456    | 0.58  | 0.560 |
| Treatment/medication code: morphine                                                     | 0.11  | 0.779 | -0.14 | 0.474    | 0.58  | 0.560 |
| Non-cancer illness code, self-reported: polio / poliomyelitis                           | 0.10  | 0.654 | 0.26  | 0.072    | -0.58 | 0.560 |
| Treatment/medication code: oxytetracycline                                              | 0.25  | 0.621 | -0.09 | 0.757    | 0.58  | 0.560 |
| Non-cancer illness code, self-reported: bladder problem (not cancer)                    | -0.09 | 0.721 | 0.08  | 0.579    | -0.58 | 0.561 |
| Diagnoses - main ICD10: K13 Other diseases of lip and oral mucosa                       | 0.38  | 0.439 | 0.07  | 0.778    | 0.58  | 0.561 |
| Chest pain or discomfort                                                                | 0.19  | 0.014 | 0.24  | 2.58E-11 | -0.58 | 0.561 |
| Diagnoses - main ICD10: J45 Asthma                                                      | 0.20  | 0.516 | 0.43  | 0.092    | -0.58 | 0.562 |
| Treatment/medication code: procyclidine                                                 | -0.34 | 0.470 | -0.05 | 0.788    | -0.58 | 0.562 |
| Treatment/medication code: piroxicam                                                    | 0.29  | 0.448 | 0.05  | 0.788    | 0.58  | 0.562 |
| Diagnoses - main ICD10: I73 Other peripheral vascular diseases                          | 0.43  | 0.239 | 0.19  | 0.326    | 0.58  | 0.563 |
| Whole body water mass                                                                   | 0.06  | 0.223 | 0.09  | 7.00E-04 | -0.58 | 0.563 |
| Leg predicted mass (right)                                                              | 0.06  | 0.185 | 0.10  | 6.00E-04 | -0.58 | 0.563 |
| Underlying (primary) cause of death: ICD10: C02.9 Tongue, unspecified                   | -0.83 | 0.556 | -0.01 | 0.980    | -0.57 | 0.565 |
| Diagnoses - main ICD10: T40 Poisoning by narcotics and psychodysleptics [hallucinogens] | -0.03 | 0.901 | 0.14  | 0.315    | -0.57 | 0.565 |
| Treatment/medication code: adalat 5mg capsule                                           | 0.22  | 0.536 | 0.48  | 0.105    | -0.57 | 0.566 |
| Current employment status: Retired                                                      | 0.08  | 0.591 | -0.02 | 0.831    | 0.57  | 0.566 |
| Treatment/medication code: salmeterol+fluticasone propionate                            | -0.13 | 0.725 | 0.14  | 0.631    | -0.57 | 0.567 |

|                                                                                                              |       |       |       |          |       |       |
|--------------------------------------------------------------------------------------------------------------|-------|-------|-------|----------|-------|-------|
| Diagnoses - main ICD10: I51 Complications and ill-defined descriptions of heart disease                      | 0.18  | 0.540 | -0.01 | 0.965    | 0.57  | 0.568 |
| Illnesses of mother: None of the above (group 2)                                                             | 0.09  | 0.492 | 0.01  | 0.919    | 0.57  | 0.568 |
| Chest pain felt outside physical activity                                                                    | -0.12 | 0.808 | 0.33  | 0.594    | -0.57 | 0.569 |
| Treatment/medication code: mesalazine                                                                        | 0.10  | 0.742 | 0.32  | 0.150    | -0.57 | 0.569 |
| Chest pain or discomfort when walking uphill or hurrying                                                     | 0.01  | 0.954 | 0.13  | 0.129    | -0.57 | 0.570 |
| Underlying (primary) cause of death: ICD10: C26.0 Intestinal tract, part unspecified                         | -0.28 | 0.420 | -0.06 | 0.686    | -0.57 | 0.570 |
| Vitamin and mineral supplements: Vitamin C                                                                   | 0.10  | 0.368 | 0.03  | 0.688    | 0.57  | 0.571 |
| Underlying (primary) cause of death: ICD10: C14.0 Pharynx, unspecified                                       | 0.16  | 0.719 | -0.13 | 0.610    | 0.57  | 0.571 |
| Treatment/medication code: Free-text entry, unable to be coded                                               | 0.15  | 0.478 | 0.30  | 0.041    | -0.57 | 0.571 |
| Illness, injury, bereavement, stress in last 2 years: Serious illness, injury or assault of a close relative | 0.03  | 0.820 | 0.11  | 0.156    | -0.56 | 0.572 |
| Diagnoses - main ICD10: R13 Dysphagia                                                                        | -0.33 | 0.704 | 0.22  | 0.622    | -0.56 | 0.573 |
| Non-cancer illness code, self-reported: parkinsons disease                                                   | 0.14  | 0.680 | -0.08 | 0.679    | 0.56  | 0.573 |
| Diagnoses - main ICD10: E11 Non-insulin-dependent diabetes mellitus                                          | 0.37  | 0.113 | 0.21  | 0.155    | 0.56  | 0.574 |
| Chest pain felt during physical activity                                                                     | 0.24  | 0.296 | 0.10  | 0.379    | 0.56  | 0.575 |
| Treatment/medication code: risedronate sodium                                                                | 0.59  | 0.219 | 0.29  | 0.249    | 0.56  | 0.575 |
| Treatment/medication code: bezafibrate                                                                       | 0.05  | 0.886 | 0.29  | 0.224    | -0.56 | 0.576 |
| Diagnoses - main ICD10: N17 Acute renal failure                                                              | 0.39  | 0.460 | 0.06  | 0.797    | 0.56  | 0.576 |
| Non-cancer illness code, self-reported: brain haemorrhage                                                    | -0.16 | 0.766 | 0.19  | 0.572    | -0.56 | 0.576 |
| Treatment/medication code: latanoprost                                                                       | 0.09  | 0.656 | -0.04 | 0.734    | 0.56  | 0.576 |
| Diagnoses - main ICD10: C25 Malignant neoplasm of pancreas                                                   | -0.17 | 0.378 | -0.05 | 0.599    | -0.56 | 0.576 |
| Difficulty not smoking for 1 day                                                                             | 0.02  | 0.882 | 0.11  | 0.100    | -0.56 | 0.576 |
| Leg fat-free mass (right)                                                                                    | 0.07  | 0.171 | 0.10  | 6.00E-04 | -0.56 | 0.578 |
| Non-cancer illness code, self-reported: multiple sclerosis                                                   | -0.07 | 0.711 | 0.05  | 0.629    | -0.56 | 0.578 |
| Non-cancer illness code, self-reported: fracture finger                                                      | -0.14 | 0.704 | 0.11  | 0.667    | -0.56 | 0.579 |
| Non-cancer illness code, self-reported: arthritis (nos)                                                      | -0.02 | 0.946 | 0.15  | 0.326    | -0.55 | 0.579 |
| Diagnoses - main ICD10: N93 Other abnormal uterine and vaginal bleeding                                      | 0.50  | 0.602 | -0.06 | 0.854    | 0.55  | 0.580 |
| Treatment/medication code: zapain caplet                                                                     | 0.34  | 0.612 | -0.08 | 0.824    | 0.55  | 0.581 |
| Qualifications: O levels/GCSEs or equivalent                                                                 | 0.01  | 0.838 | -0.03 | 0.466    | 0.55  | 0.581 |
| Diagnoses - main ICD10: N41 Inflammatory diseases of prostate                                                | 0.02  | 0.965 | -0.26 | 0.387    | 0.55  | 0.582 |

|                                                                                                                      |       |       |       |          |       |       |
|----------------------------------------------------------------------------------------------------------------------|-------|-------|-------|----------|-------|-------|
| Diagnoses - main ICD10: S72 Fracture of femur                                                                        | 0.26  | 0.298 | 0.10  | 0.512    | 0.55  | 0.582 |
| Diagnoses - main ICD10: N84 Polyp of female genital tract                                                            | 0.00  | 0.989 | 0.14  | 0.281    | -0.55 | 0.583 |
| Potassium in urine                                                                                                   | 0.03  | 0.717 | -0.02 | 0.635    | 0.55  | 0.583 |
| Non-cancer illness code, self-reported: ankylosing spondylitis                                                       | 0.28  | 0.405 | 0.07  | 0.671    | 0.55  | 0.584 |
| Non-cancer illness code, self-reported: nephritis                                                                    | 0.18  | 0.567 | -0.01 | 0.958    | 0.55  | 0.585 |
| Treatment/medication code: prednisolone                                                                              | 0.29  | 0.176 | 0.43  | 5.00E-04 | -0.55 | 0.585 |
| Diagnoses - main ICD10: K05 Gingivitis and periodontal diseases                                                      | -0.10 | 0.752 | 0.09  | 0.550    | -0.55 | 0.585 |
| Length of working week for main job                                                                                  | 0.03  | 0.818 | -0.05 | 0.496    | 0.55  | 0.585 |
| Diagnoses - main ICD10: M23 Internal derangement of knee                                                             | -0.08 | 0.575 | 0.01  | 0.919    | -0.55 | 0.585 |
| Diagnoses - main ICD10: M13 Other arthritis                                                                          | 0.07  | 0.800 | 0.25  | 0.166    | -0.55 | 0.586 |
| Non-cancer illness code, self-reported: vertigo                                                                      | -0.28 | 0.608 | 0.04  | 0.857    | -0.54 | 0.587 |
| Non-cancer illness code, self-reported: trigeminal neuralgia                                                         | -0.59 | 0.700 | 0.39  | 0.682    | -0.54 | 0.587 |
| Reason for glasses/contact lenses: For just reading/near work as you are getting older (called 'presbyopia')         | 0.27  | 0.239 | 0.13  | 0.241    | 0.54  | 0.587 |
| Treatment/medication code: crestor 10mg tablet                                                                       | -0.09 | 0.742 | 0.07  | 0.587    | -0.54 | 0.588 |
| Treatment/medication code: opticrom allergy eye drops                                                                | -0.60 | 0.392 | -0.19 | 0.510    | -0.54 | 0.588 |
| Diagnoses - main ICD10: H71 Cholesteatoma of middle ear                                                              | -0.20 | 0.445 | -0.04 | 0.767    | -0.54 | 0.588 |
| Diagnoses - main ICD10: M62 Other disorders of muscle                                                                | 0.61  | 0.461 | 0.14  | 0.574    | 0.54  | 0.589 |
| Treatment/medication code: reductil 10mg capsule                                                                     | -0.06 | 0.822 | 0.10  | 0.468    | -0.54 | 0.589 |
| Treatment/medication code: zinc product                                                                              | -0.42 | 0.508 | -0.04 | 0.892    | -0.54 | 0.590 |
| Diagnoses - main ICD10: T83 Complications of genito-urinary prosthetic devices, implants and grafts                  | 0.12  | 0.771 | -0.13 | 0.550    | 0.54  | 0.590 |
| Diagnoses - main ICD10: Z00 General examination and investigation of persons without complaint or reported diagnosis | 0.01  | 0.976 | -0.22 | 0.357    | 0.54  | 0.591 |
| Creatinine (enzymatic) in urine                                                                                      | 0.01  | 0.892 | 0.05  | 0.163    | -0.54 | 0.591 |
| Treatment/medication code: tamsulosin                                                                                | -0.02 | 0.957 | -0.20 | 0.222    | 0.54  | 0.591 |
| Diagnoses - main ICD10: Z36 Antenatal screening                                                                      | 0.15  | 0.464 | 0.03  | 0.807    | 0.54  | 0.592 |
| Treatment/medication code: escitalopram                                                                              | 0.27  | 0.207 | 0.14  | 0.139    | 0.54  | 0.592 |
| Treatment/medication code: diclofenac                                                                                | 0.04  | 0.780 | 0.12  | 0.192    | -0.54 | 0.593 |
| Treatment/medication code: fenofibrate                                                                               | -0.79 | 0.697 | 0.52  | 0.704    | -0.54 | 0.593 |
| Home area population density - urban or rural: Scotland - Remote Rural                                               | 0.26  | 0.123 | 0.16  | 0.084    | 0.53  | 0.593 |

|                                                                                                      |       |       |       |       |       |       |
|------------------------------------------------------------------------------------------------------|-------|-------|-------|-------|-------|-------|
| Treatment/medication code: duloxetine                                                                | 0.32  | 0.652 | -0.09 | 0.767 | 0.53  | 0.594 |
| Diagnoses - main ICD10: M15 Polyarthrosis                                                            | -0.14 | 0.658 | 0.05  | 0.766 | -0.53 | 0.594 |
| Treatment/medication code: oilatum cream                                                             | 0.42  | 0.247 | 0.20  | 0.274 | 0.53  | 0.595 |
| Diagnoses - main ICD10: H43 Disorders of vitreous body                                               | 0.50  | 0.548 | 0.03  | 0.918 | 0.53  | 0.595 |
| Non-cancer illness code, self-reported: breast cysts                                                 | 0.49  | 0.302 | 0.21  | 0.345 | 0.53  | 0.595 |
| Diagnoses - main ICD10: D16 Benign neoplasm of bone and articular cartilage                          | 0.01  | 0.953 | -0.11 | 0.321 | 0.53  | 0.596 |
| Non-cancer illness code, self-reported: psoriatic arthropathy                                        | 0.51  | 0.262 | 0.24  | 0.247 | 0.53  | 0.596 |
| Underlying (primary) cause of death: ICD10: J43.9 Emphysema, unspecified                             | 0.41  | 0.747 | -0.51 | 0.666 | 0.53  | 0.596 |
| Diagnoses - main ICD10: S46 Injury of muscle and tendon at shoulder and upper arm level              | -0.06 | 0.791 | 0.08  | 0.511 | -0.53 | 0.598 |
| Eye problems/disorders: Other serious eye condition                                                  | 0.30  | 0.359 | 0.11  | 0.478 | 0.53  | 0.598 |
| Treatment/medication code: diovan 40mg capsule                                                       | 0.10  | 0.668 | 0.24  | 0.038 | -0.53 | 0.598 |
| Treatment/medication code: epilim 100mg crushable tablet                                             | -0.04 | 0.882 | 0.11  | 0.414 | -0.52 | 0.600 |
| Non-cancer illness code, self-reported: bph / benign prostatic hypertrophy                           | 0.08  | 0.894 | -0.52 | 0.592 | 0.52  | 0.600 |
| Had menopause                                                                                        | -0.05 | 0.714 | 0.03  | 0.654 | -0.52 | 0.601 |
| Medication for pain relief, constipation, heartburn: Ibuprofen (e.g. Nurofen)                        | 0.10  | 0.273 | 0.04  | 0.396 | 0.52  | 0.601 |
| Risk taking                                                                                          | -0.03 | 0.670 | 0.01  | 0.759 | -0.52 | 0.601 |
| Illnesses of siblings: High blood pressure                                                           | 0.15  | 0.083 | 0.10  | 0.032 | 0.52  | 0.602 |
| Treatment/medication code: captopril                                                                 | 0.24  | 0.614 | -0.03 | 0.889 | 0.52  | 0.602 |
| Illnesses of mother: Breast cancer                                                                   | -0.10 | 0.436 | -0.03 | 0.654 | -0.52 | 0.602 |
| Treatment/medication code: arthrotec 50 tablet                                                       | -0.09 | 0.743 | 0.08  | 0.632 | -0.52 | 0.603 |
| Underlying (primary) cause of death: ICD10: J44.9 Chronic obstructive pulmonary disease, unspecified | 0.23  | 0.736 | -0.18 | 0.651 | 0.52  | 0.604 |
| Non-cancer illness code, self-reported: haemorrhoids / piles                                         | 0.05  | 0.823 | 0.19  | 0.142 | -0.52 | 0.605 |
| Underlying (primary) cause of death: ICD10: C22.1 Intrahepatic bile duct carcinoma                   | 0.52  | 0.539 | 0.06  | 0.802 | 0.52  | 0.605 |
| Underlying (primary) cause of death: ICD10: C32.9 Larynx, unspecified                                | 0.04  | 0.893 | 0.21  | 0.190 | -0.51 | 0.608 |
| Non-cancer illness code, self-reported: stroke                                                       | 0.06  | 0.754 | 0.18  | 0.096 | -0.51 | 0.608 |
| Diagnoses - main ICD10: G43 Migraine                                                                 | -0.14 | 0.603 | 0.01  | 0.926 | -0.51 | 0.609 |
| Treatment/medication code: ortho-gynest 500micrograms pessary                                        | -0.34 | 0.656 | 0.07  | 0.783 | -0.51 | 0.610 |
| Number of cigarettes previously smoked daily                                                         | 0.08  | 0.340 | 0.03  | 0.463 | 0.51  | 0.610 |
| Treatment/medication code: azopt 10mg/ml eye drops                                                   | 0.64  | 0.540 | 0.09  | 0.726 | 0.51  | 0.610 |



|                                                                                                           |       |       |       |       |       |       |
|-----------------------------------------------------------------------------------------------------------|-------|-------|-------|-------|-------|-------|
| Underlying (primary) cause of death: ICD10: I42.9 Cardiomyopathy, unspecified                             | 0.22  | 0.506 | 0.03  | 0.827 | 0.51  | 0.611 |
| Diagnoses - main ICD10: T84 Complications of internal orthopaedic prosthetic devices, implants and grafts | 0.11  | 0.567 | -0.01 | 0.967 | 0.51  | 0.612 |
| Treatment/medication code: paracetamol + codeine                                                          | 0.84  | 0.605 | 0.01  | 0.976 | 0.51  | 0.613 |
| Treatment/medication code: humira 40mg injection solution 0.8ml prefilled syringe                         | 0.12  | 0.627 | 0.27  | 0.036 | -0.51 | 0.613 |
| Frequency of other exercises in last 4 weeks                                                              | 0.05  | 0.721 | -0.03 | 0.680 | 0.50  | 0.614 |
| Treatment/medication code: flixonase 50micrograms aqueous nasal spray                                     | 0.14  | 0.527 | 0.02  | 0.843 | 0.50  | 0.614 |
| Cancer code, self-reported: cervical cancer                                                               | 0.10  | 0.572 | -0.01 | 0.950 | 0.50  | 0.615 |
| Birth weight of first child                                                                               | -0.01 | 0.928 | -0.05 | 0.238 | 0.50  | 0.617 |
| Treatment/medication code: implanon 68mg subdermal implant                                                | 0.50  | 0.559 | 0.05  | 0.841 | 0.50  | 0.618 |
| Sitting height                                                                                            | 0.04  | 0.330 | 0.02  | 0.398 | 0.50  | 0.618 |
| Non-cancer illness code, self-reported: urinary frequency / incontinence                                  | 0.01  | 0.981 | 0.15  | 0.306 | -0.50 | 0.618 |
| Underlying (primary) cause of death: ICD10: X70.8 Other specified place                                   | 0.07  | 0.770 | -0.07 | 0.584 | 0.50  | 0.618 |
| Diagnoses - main ICD10: J38 Diseases of vocal cords and larynx, not elsewhere classified                  | 0.84  | 0.215 | 0.46  | 0.224 | 0.50  | 0.618 |
| Diagnoses - main ICD10: R25 Abnormal involuntary movements                                                | 0.21  | 0.549 | 0.02  | 0.932 | 0.50  | 0.619 |
| Non-cancer illness code, self-reported: cellulitis                                                        | 0.08  | 0.795 | -0.09 | 0.558 | 0.50  | 0.619 |
| Underlying (primary) cause of death: ICD10: I62.9 Intracranial haemorrhage (nontraumatic), unspecified    | 0.10  | 0.844 | -0.19 | 0.523 | 0.50  | 0.620 |
| Treatment/medication code: levocetirizine                                                                 | -0.07 | 0.903 | 0.29  | 0.526 | -0.50 | 0.620 |
| Diagnoses - main ICD10: K02 Dental caries                                                                 | 0.04  | 0.888 | 0.20  | 0.281 | -0.50 | 0.620 |
| Which eye(s) affected by hypermetropia (long sight): Right eye                                            | -0.02 | 0.939 | 0.11  | 0.378 | -0.50 | 0.620 |
| Alcohol drinker status: Never                                                                             | 0.02  | 0.886 | 0.08  | 0.180 | -0.49 | 0.621 |
| Underlying (primary) cause of death: ICD10: J18.1 Lobar pneumonia, unspecified                            | -0.52 | 0.224 | -0.28 | 0.201 | -0.49 | 0.622 |
| Average weekly fortified wine intake                                                                      | 0.05  | 0.715 | -0.03 | 0.730 | 0.49  | 0.622 |
| Diagnoses - main ICD10: L72 Follicular cysts of skin and subcutaneous tissue                              | -0.17 | 0.431 | -0.05 | 0.677 | -0.49 | 0.623 |
| Non-cancer illness code, self-reported: tendonitis / tendinitis / tenosynovitis                           | 0.33  | 0.421 | 0.11  | 0.572 | 0.49  | 0.623 |
| Treatment/medication code: omega-3/fish oil supplement                                                    | 0.01  | 0.957 | -0.09 | 0.312 | 0.49  | 0.623 |
| Average weekly intake of other alcoholic drinks                                                           | 0.16  | 0.600 | 0.00  | 0.983 | 0.49  | 0.624 |
| Diagnoses - main ICD10: M70 Soft tissue disorders related to use, overuse and pressure                    | -0.07 | 0.707 | 0.03  | 0.738 | -0.49 | 0.624 |
| Non-cancer illness code, self-reported: fracture shaft of femur                                           | 0.20  | 0.447 | 0.06  | 0.626 | 0.49  | 0.626 |

|                                                                                     |       |       |       |          |       |       |
|-------------------------------------------------------------------------------------|-------|-------|-------|----------|-------|-------|
| Diagnoses - main ICD10: G37 Other demyelinating diseases of central nervous system  | -0.09 | 0.697 | 0.04  | 0.754    | -0.49 | 0.627 |
| Underlying (primary) cause of death: ICD10: C91.1 Chronic lymphocytic leukaemia     | -0.03 | 0.952 | 0.28  | 0.430    | -0.49 | 0.627 |
| Cough on most days                                                                  | 0.12  | 0.311 | 0.19  | 0.004    | -0.49 | 0.627 |
| Had other major operations                                                          | 0.17  | 0.116 | 0.23  | 6.00E-04 | -0.48 | 0.628 |
| Treatment/medication code: ranitidine                                               | 0.18  | 0.270 | 0.27  | 0.004    | -0.48 | 0.628 |
| Diagnoses - main ICD10: R31 Unspecified haematuria                                  | -0.11 | 0.612 | 0.01  | 0.931    | -0.48 | 0.628 |
| Treatment/medication code: fluticasone                                              | 0.11  | 0.707 | 0.27  | 0.096    | -0.48 | 0.629 |
| Treatment/medication code: clomipramine                                             | 0.01  | 0.989 | -0.21 | 0.344    | 0.48  | 0.630 |
| Treatment/medication code: conjugated oestrogens                                    | -0.06 | 0.823 | 0.09  | 0.529    | -0.48 | 0.630 |
| Surgery on leg arteries (other than for varicose veins)                             | -0.16 | 0.648 | 0.03  | 0.871    | -0.48 | 0.631 |
| Diagnoses - main ICD10: L27 Dermatitis due to substances taken internally           | -0.88 | 0.648 | 0.06  | 0.850    | -0.48 | 0.631 |
| Mouth/teeth dental problems: Loose teeth                                            | 0.09  | 0.412 | 0.03  | 0.683    | 0.48  | 0.631 |
| Diagnoses - main ICD10: K81 Cholecystitis                                           | 0.01  | 0.968 | 0.13  | 0.312    | -0.48 | 0.632 |
| Treatment/medication code: nasobec aqueous 50micrograms nasal spray                 | 0.31  | 0.675 | -0.07 | 0.810    | 0.48  | 0.632 |
| Diagnoses - main ICD10: R79 Other abnormal findings of blood chemistry              | 0.24  | 0.320 | 0.11  | 0.323    | 0.47  | 0.635 |
| Underlying (primary) cause of death: ICD10: M06.9 Rheumatoid arthritis, unspecified | 0.86  | 0.709 | -0.31 | 0.731    | 0.47  | 0.636 |
| Medication for cholesterol, blood pressure or diabetes: Blood pressure medication   | 0.05  | 0.507 | 0.09  | 0.057    | -0.47 | 0.637 |
| Illnesses of siblings: Bowel cancer                                                 | -0.16 | 0.382 | -0.06 | 0.552    | -0.47 | 0.637 |
| Manic/hyper symptoms: I needed less sleep than usual                                | 0.26  | 0.699 | -0.10 | 0.781    | 0.47  | 0.637 |
| Non-cancer illness code, self-reported: encephalitis                                | 0.39  | 0.308 | 0.18  | 0.368    | 0.47  | 0.638 |
| Non-cancer illness code, self-reported: mania/bipolar disorder/manic depression     | 0.17  | 0.343 | 0.08  | 0.402    | 0.47  | 0.638 |
| Treatment/medication code: telfast 30 tablet                                        | 0.36  | 0.454 | 0.10  | 0.716    | 0.47  | 0.638 |
| Treatment/medication code: perindopril                                              | 0.33  | 0.027 | 0.25  | 4.00E-04 | 0.47  | 0.638 |
| Non-cancer illness code, self-reported: urticaria                                   | -0.33 | 0.539 | -0.06 | 0.772    | -0.47 | 0.639 |
| Diagnoses - main ICD10: C53 Malignant neoplasm of cervix uteri                      | -0.69 | 0.557 | -0.13 | 0.657    | -0.47 | 0.640 |
| Underlying (primary) cause of death: ICD10: F03 Unspecified dementia                | -0.27 | 0.514 | -0.05 | 0.791    | -0.47 | 0.640 |
| Trunk fat-free mass                                                                 | 0.06  | 0.263 | 0.08  | 0.002    | -0.47 | 0.641 |
| Transport type for commuting to job workplace: Car/motor vehicle                    | 0.06  | 0.595 | 0.11  | 0.038    | -0.47 | 0.641 |
| Non-cancer illness code, self-reported: trapped nerve/compressed nerve              | -0.36 | 0.351 | -0.16 | 0.390    | -0.47 | 0.641 |
| Diagnoses - main ICD10: I21 Acute myocardial infarction                             | 0.03  | 0.793 | 0.10  | 0.174    | -0.47 | 0.641 |

|                                                                                                           |       |       |       |       |       |       |
|-----------------------------------------------------------------------------------------------------------|-------|-------|-------|-------|-------|-------|
| Illnesses of mother: Diabetes                                                                             | 0.06  | 0.531 | 0.11  | 0.020 | -0.46 | 0.642 |
| Mean time to correctly identify matches                                                                   | -0.02 | 0.770 | 0.01  | 0.656 | -0.46 | 0.642 |
| Non-cancer illness code, self-reported: menorrhagia (unknown cause)                                       | 0.17  | 0.529 | 0.32  | 0.074 | -0.46 | 0.642 |
| Average monthly spirits intake                                                                            | -0.01 | 0.976 | 0.09  | 0.271 | -0.46 | 0.643 |
| Non-cancer illness code, self-reported: ureteric obstruction/hydronephrosis                               | 0.66  | 0.397 | 0.26  | 0.467 | 0.46  | 0.643 |
| Trunk predicted mass                                                                                      | 0.06  | 0.261 | 0.08  | 0.002 | -0.46 | 0.643 |
| Treatment/medication code: prozac 20mg capsule                                                            | -0.26 | 0.511 | -0.03 | 0.909 | -0.46 | 0.644 |
| Treatment/medication code: co-careldopa                                                                   | -0.06 | 0.876 | 0.14  | 0.461 | -0.46 | 0.645 |
| Duration of vigorous activity                                                                             | 0.02  | 0.826 | 0.07  | 0.253 | -0.46 | 0.645 |
| Treatment/medication code: mycophenolate                                                                  | 0.21  | 0.428 | 0.07  | 0.643 | 0.46  | 0.646 |
| Non-cancer illness code, self-reported: fracture forearm / wrist                                          | -0.32 | 0.700 | 0.09  | 0.795 | -0.46 | 0.649 |
| Non-cancer illness code, self-reported: alcohol dependency                                                | -0.02 | 0.907 | 0.07  | 0.480 | -0.45 | 0.649 |
| Treatment/medication code: flixotide 25micrograms inhaler                                                 | 0.40  | 0.324 | 0.19  | 0.311 | 0.45  | 0.649 |
| Diagnoses - main ICD10: F31 Bipolar affective disorder                                                    | 0.06  | 0.737 | -0.03 | 0.738 | 0.45  | 0.650 |
| Treatment/medication code: adalate 10mg capsule                                                           | -0.07 | 0.833 | 0.10  | 0.574 | -0.45 | 0.650 |
| Treatment/medication code: neoclarityn 5mg tablet                                                         | 0.17  | 0.512 | 0.04  | 0.690 | 0.45  | 0.651 |
| Illnesses of father: Heart disease                                                                        | 0.08  | 0.334 | 0.13  | 0.004 | -0.45 | 0.651 |
| Diagnoses - main ICD10: L60 Nail disorders                                                                | -0.18 | 0.349 | -0.08 | 0.416 | -0.45 | 0.652 |
| Diagnoses - main ICD10: Z52 Donors of organs and tissues                                                  | 0.09  | 0.760 | 0.26  | 0.212 | -0.45 | 0.652 |
| Non-cancer illness code, self-reported: clotting disorder/excessive bleeding                              | 0.09  | 0.795 | -0.09 | 0.661 | 0.45  | 0.653 |
| Treatment/medication code: salamol 100micrograms inhaler                                                  | -0.02 | 0.944 | 0.11  | 0.383 | -0.45 | 0.654 |
| Treatment/medication code: glucosamine product                                                            | -0.12 | 0.352 | -0.06 | 0.359 | -0.45 | 0.654 |
| Treatment/medication code: zirtek 10mg tablet                                                             | -0.95 | 0.680 | 0.10  | 0.816 | -0.45 | 0.654 |
| Non-cancer illness code, self-reported: fracture foot                                                     | -0.10 | 0.769 | 0.07  | 0.663 | -0.45 | 0.654 |
| Type of tobacco previously smoked: Cigars or pipes                                                        | 0.02  | 0.926 | 0.12  | 0.286 | -0.45 | 0.655 |
| Mineral and other dietary supplements: Iron                                                               | 0.21  | 0.176 | 0.13  | 0.116 | 0.45  | 0.655 |
| Treatment/medication code: lisinopril+hydrochlorothiazide 10mg/12.5mg tablet                              | -0.12 | 0.640 | 0.01  | 0.931 | -0.45 | 0.655 |
| Diagnoses - main ICD10: Z53 Persons encountering health services for specific procedures, not carried out | 0.10  | 0.739 | -0.05 | 0.754 | 0.44  | 0.657 |
| Non-cancer illness code, self-reported: heart failure/pulmonary odema                                     | 0.24  | 0.414 | 0.08  | 0.720 | 0.44  | 0.657 |

|                                                                                  |       |       |       |       |       |       |
|----------------------------------------------------------------------------------|-------|-------|-------|-------|-------|-------|
| Nap during day                                                                   | 0.05  | 0.366 | 0.08  | 0.002 | -0.44 | 0.657 |
| Underlying (primary) cause of death: ICD10: C22.0 Liver cell carcinoma           | -0.37 | 0.407 | -0.15 | 0.417 | -0.44 | 0.657 |
| Treatment/medication code: enalapril                                             | 0.22  | 0.187 | 0.13  | 0.237 | 0.44  | 0.660 |
| Diagnoses - main ICD10: D86 Sarcoidosis                                          | -0.57 | 0.731 | 0.20  | 0.718 | -0.44 | 0.660 |
| Treatment/medication code: dixerit 25mcg tablet                                  | -0.49 | 0.503 | -0.14 | 0.623 | -0.44 | 0.661 |
| Illnesses of siblings: None of the above (group 1)                               | -0.18 | 0.024 | -0.14 | 0.002 | -0.44 | 0.661 |
| Non-cancer illness code, self-reported: chickenpox                               | 0.58  | 0.567 | 0.11  | 0.741 | 0.44  | 0.661 |
| Morning/evening person (chronotype)                                              | 0.03  | 0.582 | 0.06  | 0.085 | -0.44 | 0.661 |
| Treatment/medication code: multivitamins                                         | -0.31 | 0.438 | -0.11 | 0.565 | -0.44 | 0.662 |
| Diagnoses - main ICD10: S86 Injury of muscle and tendon at lower leg level       | 0.17  | 0.593 | 0.01  | 0.946 | 0.44  | 0.662 |
| Which eye(s) affected by presbyopia: Right eye                                   | -0.26 | 0.520 | -0.07 | 0.694 | -0.44 | 0.663 |
| Non-cancer illness code, self-reported: other joint disorder                     | -0.06 | 0.896 | 0.17  | 0.553 | -0.44 | 0.663 |
| Diagnoses - main ICD10: R04 Haemorrhage from respiratory passages                | -0.22 | 0.417 | -0.09 | 0.532 | -0.43 | 0.665 |
| Diagnoses - main ICD10: F43 Reaction to severe stress, and adjustment disorders  | 0.63  | 0.363 | 0.30  | 0.357 | 0.43  | 0.666 |
| Diagnoses - main ICD10: S22 Fracture of rib(s), sternum and thoracic spine       | 0.12  | 0.695 | -0.03 | 0.857 | 0.43  | 0.666 |
| Diagnoses - main ICD10: C82 Follicular [nodular] non-Hodgkin's lymphoma          | 0.23  | 0.689 | -0.04 | 0.875 | 0.43  | 0.668 |
| Illness, injury, bereavement, stress in last 2 years: Marital separation/divorce | -0.05 | 0.781 | 0.04  | 0.673 | -0.43 | 0.668 |
| Number of incorrect matches in round                                             | 0.04  | 0.544 | 0.01  | 0.757 | 0.43  | 0.670 |
| Diagnoses - main ICD10: N82 Fistulae involving female genital tract              | -0.20 | 0.651 | 0.00  | 0.985 | -0.42 | 0.671 |
| Treatment/medication code: berocca effervescent tablet                           | 0.19  | 0.586 | 0.39  | 0.202 | -0.42 | 0.672 |
| Pulse wave Arterial Stiffness index                                              | 0.07  | 0.542 | 0.01  | 0.826 | 0.42  | 0.672 |
| Treatment/medication code: vitamin c product                                     | -0.10 | 0.749 | 0.05  | 0.761 | -0.42 | 0.672 |
| Ever tried to stop smoking                                                       | 0.22  | 0.616 | 0.02  | 0.940 | 0.42  | 0.672 |
| Treatment/medication code: vitamin b compound tablet                             | 0.01  | 0.966 | -0.09 | 0.450 | 0.42  | 0.673 |
| Chest pain or discomfort walking normally                                        | 0.17  | 0.153 | 0.11  | 0.085 | 0.42  | 0.673 |
| Diagnoses - main ICD10: R20 Disturbances of skin sensation                       | 0.39  | 0.731 | -0.12 | 0.780 | 0.42  | 0.673 |
| Hip pain for 3+ months                                                           | 0.38  | 0.569 | 0.07  | 0.839 | 0.42  | 0.674 |
| Treatment/medication code: spiriva 18micrograms inhalation capsule               | 0.08  | 0.610 | 0.00  | 0.980 | 0.42  | 0.675 |
| Diagnoses - main ICD10: G44 Other headache syndromes                             | 0.04  | 0.835 | -0.06 | 0.612 | 0.42  | 0.677 |
| Treatment/medication code: cyclizine                                             | 0.06  | 0.886 | 0.30  | 0.417 | -0.42 | 0.678 |

|                                                                                             |       |       |       |          |       |       |
|---------------------------------------------------------------------------------------------|-------|-------|-------|----------|-------|-------|
| Non-cancer illness code, self-reported: retinal artery/vein occlusion                       | 0.90  | 0.558 | 0.23  | 0.603    | 0.42  | 0.678 |
| Non-cancer illness code, self-reported: transient ischaemic attack (tia)                    | 0.26  | 0.316 | 0.14  | 0.326    | 0.41  | 0.679 |
| Treatment/medication code: salbutamol                                                       | 0.26  | 0.085 | 0.19  | 0.028    | 0.41  | 0.679 |
| Illnesses of mother: Alzheimer's disease/dementia                                           | 0.12  | 0.535 | 0.03  | 0.705    | 0.41  | 0.679 |
| Treatment/medication code: isotard 25xl m/r tablet                                          | 0.34  | 0.363 | 0.17  | 0.311    | 0.41  | 0.680 |
| Treatment/medication code: cozaar-comp 50mg/12.5mg tablet                                   | 0.03  | 0.901 | 0.15  | 0.278    | -0.41 | 0.681 |
| Underlying (primary) cause of death: ICD10: C90.0 Multiple myeloma                          | -0.61 | 0.397 | -0.29 | 0.317    | -0.41 | 0.681 |
| Pace-maker                                                                                  | 0.32  | 0.353 | 0.16  | 0.308    | 0.41  | 0.682 |
| Illnesses of siblings: Severe depression                                                    | 0.11  | 0.310 | 0.17  | 0.004    | -0.41 | 0.682 |
| Neck/shoulder pain for 3+ months                                                            | 0.03  | 0.881 | 0.11  | 0.326    | -0.41 | 0.683 |
| Treatment/medication code: adipine mr 10 m/r tablet                                         | -0.67 | 0.657 | -0.04 | 0.884    | -0.41 | 0.683 |
| Treatment/medication code: imdur 60mg durule                                                | -0.02 | 0.963 | -0.21 | 0.441    | 0.41  | 0.684 |
| Hearing difficulty/problems: Yes                                                            | 0.07  | 0.350 | 0.10  | 0.002    | -0.41 | 0.685 |
| Diagnoses - main ICD10: I70 Atherosclerosis                                                 | -0.25 | 0.563 | -0.06 | 0.756    | -0.41 | 0.685 |
| Vitamin and mineral supplements: Multivitamins +/- minerals                                 | 0.06  | 0.493 | 0.02  | 0.651    | 0.41  | 0.685 |
| Diagnoses - main ICD10: I25 Chronic ischaemic heart disease                                 | 0.13  | 0.156 | 0.17  | 4.00E-04 | -0.41 | 0.685 |
| Heel bone mineral density (BMD) T-score, automated (left)                                   | 0.01  | 0.861 | -0.02 | 0.662    | 0.40  | 0.686 |
| Diagnoses - main ICD10: M16 Coxarthrosis [arthrosis of hip]                                 | -0.14 | 0.288 | -0.08 | 0.358    | -0.40 | 0.686 |
| Diagnoses - main ICD10: F60 Specific personality disorders                                  | -0.08 | 0.722 | -0.18 | 0.141    | 0.40  | 0.686 |
| Diagnoses - main ICD10: T79 Certain early complications of trauma, not elsewhere classified | 0.49  | 0.405 | 0.23  | 0.451    | 0.40  | 0.687 |
| Diagnoses - main ICD10: C20 Malignant neoplasm of rectum                                    | 0.24  | 0.762 | -0.14 | 0.783    | 0.40  | 0.687 |
| Diagnoses - main ICD10: H00 Hordeolum and chalazion                                         | 0.43  | 0.732 | -0.09 | 0.803    | 0.40  | 0.689 |
| Treatment/medication code: prochlorperazine                                                 | -0.48 | 0.708 | 0.06  | 0.888    | -0.40 | 0.689 |
| Diagnoses - main ICD10: L05 Pilonidal cyst                                                  | 0.05  | 0.862 | -0.08 | 0.594    | 0.40  | 0.690 |
| Treatment/medication code: amlodipine                                                       | 0.13  | 0.176 | 0.09  | 0.110    | 0.40  | 0.690 |
| Non-cancer illness code, self-reported: eye/eyelid problem                                  | 0.34  | 0.378 | 0.17  | 0.420    | 0.40  | 0.690 |
| Treatment/medication code: evening primrose oil                                             | 0.24  | 0.324 | 0.13  | 0.329    | 0.40  | 0.690 |
| Underlying (primary) cause of death: ICD10: G90.3 Multisystem degeneration                  | 0.29  | 0.308 | 0.16  | 0.295    | 0.40  | 0.691 |
| Non-cancer illness code, self-reported: polycythaemia vera                                  | 0.08  | 0.781 | -0.05 | 0.752    | 0.40  | 0.691 |

|                                                                                           |       |       |       |          |       |       |
|-------------------------------------------------------------------------------------------|-------|-------|-------|----------|-------|-------|
| Diagnoses - main ICD10: E07 Other disorders of thyroid                                    | 0.50  | 0.330 | 0.27  | 0.342    | 0.40  | 0.692 |
| Treatment/medication code: dicloflex 25mg e/c tablet                                      | -0.31 | 0.737 | 0.13  | 0.833    | -0.40 | 0.692 |
| Treatment/medication code: calcichew 1.25g chewable tablet                                | -0.12 | 0.815 | 0.11  | 0.699    | -0.40 | 0.692 |
| Illnesses of siblings: Heart disease                                                      | 0.27  | 0.008 | 0.22  | 8.44E-06 | 0.40  | 0.693 |
| Treatment/medication code: pregabalin                                                     | 0.27  | 0.388 | 0.13  | 0.420    | 0.39  | 0.693 |
| Diagnoses - main ICD10: E03 Other hypothyroidism                                          | 0.31  | 0.542 | 0.64  | 0.318    | -0.39 | 0.693 |
| Treatment/medication code: arcoxia 90mg tablet                                            | 0.27  | 0.787 | -0.30 | 0.776    | 0.39  | 0.694 |
| Ever had breast cancer screening / mammogram                                              | 0.09  | 0.592 | 0.02  | 0.842    | 0.39  | 0.694 |
| Types of transport used (excluding work): Public transport                                | 0.08  | 0.394 | 0.04  | 0.524    | 0.39  | 0.695 |
| Leg pain when standing still or sitting                                                   | 0.19  | 0.516 | 0.06  | 0.679    | 0.39  | 0.695 |
| Cancer code, self-reported: unclassifiable                                                | 0.00  | 0.998 | 0.14  | 0.440    | -0.39 | 0.696 |
| Treatment/medication code: hepacon b12 1mg/1ml injection                                  | 0.24  | 0.646 | 0.54  | 0.333    | -0.39 | 0.696 |
| Alcohol intake versus 10 years previously                                                 | 0.06  | 0.423 | 0.09  | 0.011    | -0.39 | 0.696 |
| Time spent driving                                                                        | 0.04  | 0.650 | 0.00  | 0.992    | 0.39  | 0.696 |
| Non-cancer illness code, self-reported: chronic fatigue syndrome                          | -0.03 | 0.900 | 0.07  | 0.471    | -0.39 | 0.696 |
| Reason former drinker stopped drinking alcohol: Financial reasons                         | -0.96 | 0.609 | -0.20 | 0.689    | -0.39 | 0.697 |
| Diagnoses - main ICD10: K20 Oesophagitis                                                  | -0.05 | 0.855 | 0.06  | 0.608    | -0.39 | 0.697 |
| Non-cancer illness code, self-reported: allergy or anaphylactic reaction to drug          | 0.47  | 0.229 | 0.30  | 0.175    | 0.39  | 0.697 |
| Underlying (primary) cause of death: ICD10: K70.1 Alcoholic hepatitis                     | -0.21 | 0.632 | -0.02 | 0.903    | -0.39 | 0.698 |
| Diagnoses - main ICD10: H57 Other disorders of eye and adnexa                             | 0.03  | 0.922 | -0.11 | 0.500    | 0.39  | 0.698 |
| Reason for glasses/contact lenses: For 'astigmatism'                                      | -0.02 | 0.859 | 0.03  | 0.591    | -0.39 | 0.698 |
| Non-cancer illness code, self-reported: gastro-oesophageal reflux (gord) / gastric reflux | 0.12  | 0.290 | 0.07  | 0.231    | 0.39  | 0.699 |
| Treatment/medication code: vitamin b12 preparation                                        | 0.15  | 0.483 | 0.25  | 0.076    | -0.39 | 0.699 |
| Treatment/medication code: cialis 20mg tablet                                             | -0.20 | 0.606 | -0.03 | 0.886    | -0.39 | 0.700 |
| Manic/hyper symptoms: I was more creative or had more ideas than usual                    | 0.17  | 0.668 | 0.37  | 0.223    | -0.39 | 0.700 |
| Duration of other exercises                                                               | 0.03  | 0.826 | -0.03 | 0.667    | 0.38  | 0.701 |
| Non-cancer illness code, self-reported: heart valve problem/heart murmur                  | 0.35  | 0.449 | 0.15  | 0.493    | 0.38  | 0.701 |
| Treatment/medication code: vagifem 25mcg pessary                                          | 0.44  | 0.596 | 0.10  | 0.709    | 0.38  | 0.701 |
| Diagnoses - main ICD10: M80 Osteoporosis with pathological fracture                       | 0.03  | 0.948 | 0.27  | 0.528    | -0.38 | 0.703 |
| Diagnoses - main ICD10: H33 Retinal detachments and breaks                                | 0.08  | 0.621 | 0.01  | 0.891    | 0.38  | 0.703 |

|                                                                                                            |       |       |       |       |       |       |
|------------------------------------------------------------------------------------------------------------|-------|-------|-------|-------|-------|-------|
| Treatment/medication code: volsaid retard 75mg m/r tablet                                                  | 0.02  | 0.952 | 0.12  | 0.334 | -0.38 | 0.703 |
| Father's age at death                                                                                      | -0.06 | 0.536 | -0.11 | 0.121 | 0.38  | 0.703 |
| Diagnoses - main ICD10: D46 Myelodysplastic syndromes                                                      | 0.13  | 0.810 | -0.10 | 0.724 | 0.38  | 0.703 |
| Treatment/medication code: livial 2.5mg tablet                                                             | 0.18  | 0.557 | 0.05  | 0.803 | 0.38  | 0.705 |
| Treatment/medication code: rosuvastatin                                                                    | 0.19  | 0.412 | 0.09  | 0.361 | 0.38  | 0.705 |
| Treatment/medication code: adcal-d3 1.5g/10micrograms chewable tablet                                      | 0.25  | 0.125 | 0.18  | 0.055 | 0.38  | 0.705 |
| Treatment/medication code: creon e/c granules in capsule                                                   | -0.08 | 0.905 | 0.27  | 0.682 | -0.38 | 0.706 |
| Treatment/medication code: hypromellose                                                                    | -0.14 | 0.853 | 0.66  | 0.741 | -0.38 | 0.707 |
| Treatment/medication code: eumovate cream                                                                  | 0.32  | 0.271 | 0.20  | 0.237 | 0.37  | 0.708 |
| Underlying (primary) cause of death: ICD10: C73 Malignant neoplasm of thyroid gland                        | -0.08 | 0.752 | -0.18 | 0.114 | 0.37  | 0.708 |
| Non-cancer illness code, self-reported: disc problem                                                       | -0.14 | 0.797 | -0.45 | 0.441 | 0.37  | 0.708 |
| Treatment/medication code: movelat cream                                                                   | -0.15 | 0.693 | 0.01  | 0.954 | -0.37 | 0.708 |
| Diagnoses - main ICD10: R23 Other skin changes                                                             | -0.05 | 0.830 | 0.04  | 0.673 | -0.37 | 0.708 |
| Stomach/abdominal pain for 3+ months                                                                       | -0.06 | 0.816 | 0.04  | 0.717 | -0.37 | 0.710 |
| Duration walking for pleasure                                                                              | -0.09 | 0.389 | -0.05 | 0.289 | -0.37 | 0.711 |
| Underlying (primary) cause of death: ICD10: C25.9 Pancreas, unspecified                                    | -0.08 | 0.782 | 0.04  | 0.786 | -0.37 | 0.712 |
| Diagnoses - main ICD10: D37 Neoplasm of uncertain or unknown behaviour of oral cavity and digestive organs | -0.16 | 0.862 | 0.39  | 0.738 | -0.37 | 0.712 |
| Treatment/medication code: metoclopramide                                                                  | 0.12  | 0.579 | 0.03  | 0.834 | 0.37  | 0.713 |
| Longest period of unenthusiasm / disinterest                                                               | 0.12  | 0.682 | 0.00  | 0.995 | 0.37  | 0.713 |
| Treatment/medication code: sodium thyroxine                                                                | 0.06  | 0.927 | 0.83  | 0.679 | -0.37 | 0.714 |
| Treatment/medication code: magnesium citrate                                                               | 0.11  | 0.727 | -0.02 | 0.906 | 0.37  | 0.714 |
| Non-cancer illness code, self-reported: thyroid goitre                                                     | -0.04 | 0.880 | -0.15 | 0.347 | 0.37  | 0.715 |
| Diagnoses - main ICD10: N35 Urethral stricture                                                             | 0.08  | 0.738 | 0.19  | 0.172 | -0.36 | 0.716 |
| Non-cancer illness code, self-reported: gall bladder disease                                               | -0.13 | 0.604 | -0.03 | 0.805 | -0.36 | 0.716 |
| Cancer code, self-reported: liver/hepatocellular cancer                                                    | 0.22  | 0.445 | 0.11  | 0.463 | 0.36  | 0.719 |
| Diagnoses - main ICD10: T39 Poisoning by nonopioid analgesics, antipyretics and antirheumatics             | 0.22  | 0.497 | 0.09  | 0.527 | 0.36  | 0.719 |
| Impedance of leg (right)                                                                                   | -0.05 | 0.303 | -0.07 | 0.041 | 0.36  | 0.719 |
| Treatment/medication code: ismo - isosorbide mononitrate                                                   | -0.02 | 0.961 | -0.21 | 0.483 | 0.36  | 0.720 |
| Treatment/medication code: solifenacin                                                                     | 0.11  | 0.618 | 0.02  | 0.892 | 0.36  | 0.720 |

|                                                                                                                              |       |       |       |       |       |       |
|------------------------------------------------------------------------------------------------------------------------------|-------|-------|-------|-------|-------|-------|
| Underlying (primary) cause of death: ICD10: I51.7 Cardiomegaly                                                               | 0.26  | 0.390 | 0.14  | 0.366 | 0.36  | 0.722 |
| Underlying (primary) cause of death: ICD10: X42.0 Home                                                                       | -0.04 | 0.907 | 0.10  | 0.572 | -0.36 | 0.722 |
| Types of physical activity in last 4 weeks: Heavy DIY (eg: weeding, lawn mowing, carpentry, digging)                         | -0.01 | 0.869 | -0.04 | 0.279 | 0.36  | 0.722 |
| Forced expiratory volume in 1-second (FEV1), predicted                                                                       | 0.03  | 0.610 | 0.06  | 0.065 | -0.36 | 0.723 |
| Diagnoses - main ICD10: D47 Other neoplasms of uncertain or unknown behaviour of lymphoid, haematopoietic and related tissue | 0.09  | 0.777 | -0.03 | 0.808 | 0.35  | 0.723 |
| Wants to stop smoking                                                                                                        | -0.03 | 0.897 | 0.07  | 0.641 | -0.35 | 0.723 |
| Treatment/medication code: phenobarbitone                                                                                    | -0.11 | 0.860 | 0.14  | 0.685 | -0.35 | 0.724 |
| Treatment/medication code: dothiepin                                                                                         | -0.38 | 0.343 | -0.23 | 0.225 | -0.35 | 0.724 |
| Diagnoses - main ICD10: G35 Multiple sclerosis                                                                               | -0.08 | 0.898 | 0.21  | 0.698 | -0.35 | 0.726 |
| Non-cancer illness code, self-reported: anorexia/bulimia/other eating disorder                                               | -0.31 | 0.583 | -0.10 | 0.689 | -0.35 | 0.726 |
| Treatment/medication code: salbutamol 100micrograms spacehaler                                                               | 0.28  | 0.088 | 0.21  | 0.097 | 0.35  | 0.727 |
| Eye problems/disorders: Injury or trauma resulting in loss of vision                                                         | -0.40 | 0.600 | -0.11 | 0.717 | -0.35 | 0.727 |
| Treatment/medication code: lofepramine                                                                                       | -0.06 | 0.921 | -0.39 | 0.595 | 0.35  | 0.727 |
| Treatment/medication code: temazepam                                                                                         | 0.18  | 0.500 | 0.07  | 0.626 | 0.35  | 0.727 |
| Non-cancer illness code, self-reported: burns                                                                                | 0.00  | 0.991 | 0.16  | 0.501 | -0.35 | 0.728 |
| Eye problems/disorders: None of the above                                                                                    | -0.06 | 0.609 | -0.01 | 0.827 | -0.35 | 0.728 |
| Diagnoses - main ICD10: O20 Haemorrhage in early pregnancy                                                                   | 0.23  | 0.657 | 0.04  | 0.865 | 0.34  | 0.731 |
| Treatment/medication code: zomig 2.5mg tablet                                                                                | 0.04  | 0.835 | 0.12  | 0.244 | -0.34 | 0.731 |
| Treatment/medication code: travoprost                                                                                        | -0.24 | 0.647 | -0.04 | 0.862 | -0.34 | 0.731 |
| Diagnoses - main ICD10: H72 Perforation of tympanic membrane                                                                 | 0.09  | 0.885 | 0.48  | 0.615 | -0.34 | 0.733 |
| Treatment/medication code: prednisone                                                                                        | 0.29  | 0.615 | 0.07  | 0.808 | 0.34  | 0.733 |
| Treatment/medication code: carbomers                                                                                         | 0.04  | 0.913 | 0.17  | 0.396 | -0.34 | 0.734 |
| Diagnoses - main ICD10: D17 Benign lipomatous neoplasm                                                                       | -0.17 | 0.458 | -0.09 | 0.431 | -0.34 | 0.734 |
| Diagnoses - main ICD10: O23 Infections of genito-urinary tract in pregnancy                                                  | 0.05  | 0.904 | -0.11 | 0.601 | 0.34  | 0.735 |
| Treatment/medication code: oxybutynin                                                                                        | -0.10 | 0.661 | -0.01 | 0.900 | -0.34 | 0.735 |
| Pulse wave peak to peak time                                                                                                 | -0.05 | 0.657 | -0.01 | 0.936 | -0.34 | 0.735 |
| Treatment/medication code: dihydrocodeine                                                                                    | 0.23  | 0.263 | 0.15  | 0.213 | 0.34  | 0.735 |
| Non-cancer illness code, self-reported: malaria                                                                              | 0.39  | 0.544 | 0.15  | 0.602 | 0.34  | 0.735 |
| Mouth/teeth dental problems: Toothache                                                                                       | 0.22  | 0.092 | 0.17  | 0.013 | 0.34  | 0.736 |



|                                                                                            |       |       |       |          |       |       |
|--------------------------------------------------------------------------------------------|-------|-------|-------|----------|-------|-------|
| Diagnoses - main ICD10: J84 Other interstitial pulmonary diseases                          | 0.43  | 0.356 | 0.25  | 0.373    | 0.34  | 0.737 |
| Non-cancer illness code, self-reported: peptic ulcer                                       | 0.17  | 0.682 | 0.02  | 0.906    | 0.34  | 0.737 |
| Treatment/medication code: evorel 25 patch                                                 | 0.11  | 0.728 | -0.01 | 0.956    | 0.34  | 0.737 |
| Cancer code, self-reported: bladder cancer                                                 | 0.09  | 0.898 | -0.38 | 0.754    | 0.33  | 0.738 |
| Diagnoses - main ICD10: L30 Other dermatitis                                               | -0.05 | 0.898 | 0.10  | 0.641    | -0.33 | 0.739 |
| Underlying (primary) cause of death: ICD10: K74.6 Other and unspecified cirrhosis of liver | -0.25 | 0.772 | 0.05  | 0.866    | -0.33 | 0.741 |
| Tobacco smoking: Ex-smoker                                                                 | 0.07  | 0.504 | 0.03  | 0.638    | 0.33  | 0.741 |
| Treatment/medication code: premarin 625micrograms tablet                                   | -0.12 | 0.699 | -0.25 | 0.169    | 0.33  | 0.742 |
| Bring up phlegm/sputum/mucus on most days                                                  | 0.05  | 0.735 | 0.11  | 0.123    | -0.33 | 0.742 |
| Treatment/medication code: st john's wort/hypericum [ctsu]                                 | -0.06 | 0.908 | 0.71  | 0.756    | -0.33 | 0.743 |
| Tinnitus severity/nuisance                                                                 | 0.22  | 0.419 | 0.12  | 0.393    | 0.33  | 0.743 |
| Treatment/medication code: tranexamic acid                                                 | 0.39  | 0.763 | -0.06 | 0.895    | 0.33  | 0.743 |
| Treatment/medication code: arcoxia 60mg tablet                                             | -0.12 | 0.687 | -0.01 | 0.931    | -0.33 | 0.743 |
| Diagnoses - main ICD10: I22 Subsequent myocardial infarction                               | 0.15  | 0.686 | 0.31  | 0.256    | -0.33 | 0.743 |
| Treatment/medication code: bendroflumethiazide                                             | 0.03  | 0.789 | 0.06  | 0.374    | -0.33 | 0.744 |
| Non-cancer illness code, self-reported: erectile dysfunction / impotence                   | -0.04 | 0.946 | 0.20  | 0.685    | -0.33 | 0.744 |
| Comparative height size at age 10                                                          | 0.04  | 0.378 | 0.03  | 0.289    | 0.33  | 0.744 |
| Non-cancer illness code, self-reported: type 2 diabetes                                    | 0.09  | 0.584 | 0.15  | 0.098    | -0.33 | 0.745 |
| Treatment/medication code: alfacalcidol                                                    | 0.57  | 0.332 | 0.34  | 0.335    | 0.33  | 0.745 |
| Getting up in morning                                                                      | -0.08 | 0.235 | -0.10 | 5.00E-04 | 0.33  | 0.745 |
| Treatment/medication code: erythromycin                                                    | 0.35  | 0.300 | 0.23  | 0.253    | 0.32  | 0.746 |
| Non-cancer illness code, self-reported: dupuytren's contracture                            | -0.01 | 0.967 | 0.09  | 0.542    | -0.32 | 0.747 |
| Non-cancer illness code, self-reported: cervical erosion                                   | 0.74  | 0.710 | 0.09  | 0.769    | 0.32  | 0.748 |
| Treatment/medication code: omeprazole                                                      | 0.16  | 0.111 | 0.20  | 1.00E-04 | -0.32 | 0.749 |
| Treatment/medication code: premique 0.625mg/5mg tablet                                     | -0.03 | 0.921 | -0.13 | 0.358    | 0.32  | 0.749 |
| Breastfed as a baby                                                                        | -0.06 | 0.496 | -0.03 | 0.573    | -0.32 | 0.750 |
| Tobacco smoking: Smokes on most or all days                                                | 0.11  | 0.664 | 0.02  | 0.875    | 0.32  | 0.750 |
| Treatment/medication code: testogel 50mg gel 5g sachet                                     | 0.03  | 0.868 | 0.10  | 0.257    | -0.32 | 0.750 |
| Prospective memory result                                                                  | 0.00  | 0.975 | 0.04  | 0.399    | -0.32 | 0.751 |

|                                                                                                                     |       |       |       |       |       |       |
|---------------------------------------------------------------------------------------------------------------------|-------|-------|-------|-------|-------|-------|
| Diagnoses - main ICD10: F45 Somatoform disorders                                                                    | 0.24  | 0.497 | 0.12  | 0.473 | 0.32  | 0.752 |
| Treatment/medication code: clarithromycin                                                                           | 0.22  | 0.693 | 0.01  | 0.970 | 0.32  | 0.752 |
| Diagnoses - main ICD10: M79 Other soft tissue disorders, not elsewhere classified                                   | 0.14  | 0.496 | 0.07  | 0.579 | 0.31  | 0.753 |
| Treatment/medication code: xalatan 0.005% eye drops                                                                 | -0.08 | 0.539 | -0.03 | 0.622 | -0.31 | 0.753 |
| Vitamin and mineral supplements: Vitamin D                                                                          | 0.08  | 0.592 | 0.13  | 0.106 | -0.31 | 0.754 |
| Treatment/medication code: slozem 120mg m/r capsule                                                                 | 0.26  | 0.497 | 0.41  | 0.146 | -0.31 | 0.755 |
| Illnesses of father: None of the above (group 2)                                                                    | 0.06  | 0.635 | 0.11  | 0.196 | -0.31 | 0.755 |
| Treatment/medication code: estraderm mx 25 patch                                                                    | 0.04  | 0.919 | 0.19  | 0.422 | -0.31 | 0.755 |
| Illnesses of siblings: Lung cancer                                                                                  | -0.16 | 0.537 | -0.06 | 0.740 | -0.31 | 0.756 |
| Average monthly intake of other alcoholic drinks                                                                    | 0.14  | 0.592 | 0.05  | 0.711 | 0.31  | 0.756 |
| Diagnoses - main ICD10: O02 Other abnormal products of conception                                                   | -0.13 | 0.676 | -0.25 | 0.209 | 0.31  | 0.758 |
| Diagnoses - main ICD10: K14 Diseases of tongue                                                                      | 0.10  | 0.727 | 0.19  | 0.216 | -0.31 | 0.759 |
| Diagnoses - main ICD10: Z08 Follow-up examination after treatment for malignant neoplasm                            | 0.35  | 0.809 | -0.19 | 0.851 | 0.31  | 0.760 |
| Non-cancer illness code, self-reported: endometriosis                                                               | 0.02  | 0.947 | -0.06 | 0.547 | 0.31  | 0.760 |
| Job involves shift work                                                                                             | 0.05  | 0.588 | 0.08  | 0.048 | -0.30 | 0.761 |
| Treatment/medication code: fybogel mebeverine sachet                                                                | -0.01 | 0.973 | -0.15 | 0.499 | 0.30  | 0.762 |
| Non-cancer illness code, self-reported: hiatus hernia                                                               | 0.10  | 0.409 | 0.15  | 0.032 | -0.30 | 0.763 |
| Average monthly beer plus cider intake                                                                              | -0.01 | 0.953 | 0.06  | 0.586 | -0.30 | 0.767 |
| Type of tobacco previously smoked: Hand-rolled cigarettes                                                           | 0.09  | 0.697 | 0.16  | 0.155 | -0.30 | 0.768 |
| Diagnoses - main ICD10: H34 Retinal vascular occlusions                                                             | 0.28  | 0.567 | 0.12  | 0.582 | 0.30  | 0.768 |
| Reason for glasses/contact lenses: For a 'lazy' eye or an eye with poor vision since childhood (called 'amblyopia') | 0.07  | 0.693 | 0.13  | 0.143 | -0.30 | 0.768 |
| Treatment/medication code: azathioprine                                                                             | 0.21  | 0.688 | 0.48  | 0.515 | -0.29 | 0.768 |
| Illnesses of father: High blood pressure                                                                            | 0.07  | 0.439 | 0.11  | 0.053 | -0.29 | 0.769 |
| Non-cancer illness code, self-reported: pneumothorax                                                                | 0.06  | 0.813 | -0.02 | 0.854 | 0.29  | 0.770 |
| Other eye problems                                                                                                  | 0.28  | 0.042 | 0.24  | 0.001 | 0.29  | 0.770 |
| Treatment/medication code: carbamazepine                                                                            | 0.06  | 0.911 | 0.32  | 0.659 | -0.29 | 0.771 |
| Treatment/medication code: irbesartan                                                                               | 0.09  | 0.684 | 0.17  | 0.144 | -0.29 | 0.771 |
| Treatment/medication code: symbicort 100/6 turbohaler                                                               | 0.03  | 0.874 | 0.10  | 0.380 | -0.29 | 0.772 |
| Diagnoses - main ICD10: I24 Other acute ischaemic heart diseases                                                    | 0.09  | 0.754 | 0.18  | 0.211 | -0.29 | 0.773 |

|                                                                                       |       |       |       |       |       |       |
|---------------------------------------------------------------------------------------|-------|-------|-------|-------|-------|-------|
| Treatment/medication code: epaderm ointment                                           | 0.01  | 0.985 | 0.10  | 0.453 | -0.29 | 0.773 |
| Non-cancer illness code, self-reported: vitiligo                                      | 0.30  | 0.317 | 0.41  | 0.079 | -0.29 | 0.775 |
| Illnesses of father: Lung cancer                                                      | 0.05  | 0.648 | 0.01  | 0.822 | 0.29  | 0.775 |
| Diagnoses - main ICD10: J01 Acute sinusitis                                           | 0.38  | 0.602 | 0.16  | 0.562 | 0.29  | 0.775 |
| Eye problems/disorders: Diabetes related eye disease                                  | 0.20  | 0.190 | 0.25  | 0.003 | -0.29 | 0.775 |
| Number of older siblings                                                              | 0.18  | 0.498 | 0.09  | 0.579 | 0.28  | 0.776 |
| Treatment/medication code: trazodone                                                  | 0.05  | 0.897 | -0.08 | 0.739 | 0.28  | 0.777 |
| Diagnoses - main ICD10: L08 Other local infections of skin and subcutaneous tissue    | -0.09 | 0.687 | -0.02 | 0.876 | -0.28 | 0.777 |
| Diagnoses - main ICD10: M84 Disorders of continuity of bone                           | 0.15  | 0.512 | 0.22  | 0.054 | -0.28 | 0.777 |
| Current employment status: In paid employment or self-employed                        | -0.06 | 0.676 | -0.10 | 0.084 | 0.28  | 0.777 |
| Treatment/medication code: gliclazide                                                 | 0.11  | 0.367 | 0.15  | 0.025 | -0.28 | 0.779 |
| Diagnoses - main ICD10: J22 Unspecified acute lower respiratory infection             | 0.11  | 0.605 | 0.04  | 0.774 | 0.28  | 0.779 |
| Non-cancer illness code, self-reported: osteopenia                                    | 0.05  | 0.918 | -0.10 | 0.717 | 0.28  | 0.780 |
| Non-cancer illness code, self-reported: fracture neck of femur / hip                  | 0.17  | 0.713 | 0.35  | 0.400 | -0.28 | 0.780 |
| Diagnoses - main ICD10: D45 Polycythaemia vera                                        | -0.17 | 0.527 | -0.08 | 0.628 | -0.28 | 0.780 |
| Diagnoses - main ICD10: E66 Obesity                                                   | 0.19  | 0.366 | 0.13  | 0.171 | 0.28  | 0.780 |
| Diagnoses - main ICD10: O90 Complications of the puerperium, not elsewhere classified | 0.56  | 0.567 | 0.26  | 0.590 | 0.28  | 0.781 |
| Medication for pain relief, constipation, heartburn: Aspirin                          | 0.13  | 0.190 | 0.16  | 0.009 | -0.28 | 0.781 |
| Diagnoses - main ICD10: M60 Myositis                                                  | 0.50  | 0.533 | 0.25  | 0.516 | 0.28  | 0.782 |
| Comparative body size at age 10                                                       | 0.06  | 0.237 | 0.04  | 0.211 | 0.28  | 0.782 |
| Treatment/medication code: salbutamol+ipratropium 100micrograms/20micrograms inhaler  | 0.47  | 0.665 | 0.15  | 0.744 | 0.28  | 0.783 |
| Work/job satisfaction                                                                 | -0.04 | 0.704 | -0.01 | 0.868 | -0.27 | 0.784 |
| Treatment/medication code: microgynon 30 tablet                                       | 0.07  | 0.843 | 0.19  | 0.331 | -0.27 | 0.784 |
| Treatment/medication code: angitil sr 90 m/r capsule                                  | -0.01 | 0.968 | 0.07  | 0.583 | -0.27 | 0.785 |
| Diagnoses - main ICD10: O80 Single spontaneous delivery                               | -0.15 | 0.824 | -0.54 | 0.670 | 0.27  | 0.786 |
| Underlying (primary) cause of death: ICD10: K70.3 Alcoholic cirrhosis of liver        | -0.08 | 0.801 | 0.01  | 0.922 | -0.27 | 0.787 |
| Treatment/medication code: protelos 2g sachets                                        | -0.07 | 0.767 | -0.14 | 0.253 | 0.27  | 0.787 |
| Treatment/medication code: lumigan 0.3mg/ml eye drops                                 | -0.20 | 0.491 | -0.11 | 0.295 | -0.27 | 0.787 |
| Frequency of light DIY in last 4 weeks                                                | 0.05  | 0.654 | 0.02  | 0.766 | 0.27  | 0.788 |

|                                                                                                       |       |       |       |       |       |       |
|-------------------------------------------------------------------------------------------------------|-------|-------|-------|-------|-------|-------|
| Diagnoses - main ICD10: T86 Failure and rejection of transplanted organs and tissues                  | -0.11 | 0.625 | -0.04 | 0.763 | -0.27 | 0.788 |
| Treatment/medication code: carvedilol                                                                 | -0.10 | 0.742 | -0.01 | 0.944 | -0.27 | 0.788 |
| Diagnoses - main ICD10: K43 Ventral hernia                                                            | 0.16  | 0.321 | 0.11  | 0.133 | 0.27  | 0.789 |
| Treatment/medication code: dermol 500 lotion                                                          | 0.25  | 0.749 | 0.49  | 0.226 | -0.27 | 0.789 |
| Diagnoses - main ICD10: H91 Other hearing loss                                                        | 0.00  | 0.996 | -0.14 | 0.574 | 0.27  | 0.790 |
| Diagnoses - main ICD10: I05 Rheumatic mitral valve diseases                                           | 0.29  | 0.690 | 0.08  | 0.793 | 0.27  | 0.790 |
| Treatment/medication code: calcium carbonate+cholecalciferol 1.25g/200iu tablet                       | 0.31  | 0.407 | 0.44  | 0.115 | -0.27 | 0.791 |
| Treatment/medication code: clopidogrel                                                                | 0.11  | 0.540 | 0.17  | 0.087 | -0.26 | 0.791 |
| Treatment/medication code: securon 40mg tablet                                                        | 0.23  | 0.548 | 0.11  | 0.620 | 0.26  | 0.791 |
| Illnesses of father: None of the above (group 1)                                                      | -0.13 | 0.228 | -0.17 | 0.023 | 0.26  | 0.792 |
| Treatment/medication code: quetiapine                                                                 | -0.06 | 0.841 | -0.15 | 0.374 | 0.26  | 0.792 |
| Diagnoses - main ICD10: N60 Benign mammary dysplasia                                                  | 0.06  | 0.739 | 0.11  | 0.216 | -0.26 | 0.793 |
| Diagnoses - main ICD10: S42 Fracture of shoulder and upper arm                                        | -0.19 | 0.677 | -0.06 | 0.793 | -0.26 | 0.793 |
| Non-cancer illness code, self-reported: polymyalgia rheumatica                                        | 0.15  | 0.358 | 0.19  | 0.024 | -0.26 | 0.793 |
| Treatment/medication code: asacol 400mg e/c tablet                                                    | -0.02 | 0.937 | 0.05  | 0.647 | -0.26 | 0.794 |
| Diagnoses - main ICD10: I49 Other cardiac arrhythmias                                                 | -0.56 | 0.827 | 0.13  | 0.845 | -0.26 | 0.794 |
| Treatment/medication code: mercilon tablet                                                            | 0.33  | 0.360 | 0.23  | 0.215 | 0.26  | 0.794 |
| Treatment/medication code: losartan                                                                   | 0.12  | 0.349 | 0.08  | 0.507 | 0.26  | 0.795 |
| Diagnoses - main ICD10: C34 Malignant neoplasm of bronchus and lung                                   | 0.20  | 0.550 | 0.11  | 0.506 | 0.26  | 0.795 |
| Treatment/medication code: quinine                                                                    | 0.14  | 0.393 | 0.09  | 0.352 | 0.26  | 0.796 |
| Underlying (primary) cause of death: ICD10: C92.0 Acute myeloid leukaemia                             | -0.21 | 0.607 | -0.09 | 0.624 | -0.25 | 0.799 |
| Treatment/medication code: calcichew d3 tablet                                                        | 0.21  | 0.199 | 0.25  | 0.008 | -0.25 | 0.800 |
| Non-cancer illness code, self-reported: cervical spondylosis                                          | 0.19  | 0.304 | 0.13  | 0.154 | 0.25  | 0.801 |
| Diagnoses - main ICD10: J39 Other diseases of upper respiratory tract                                 | 0.12  | 0.674 | 0.20  | 0.251 | -0.25 | 0.801 |
| Number of self-reported cancers                                                                       | -0.09 | 0.582 | -0.13 | 0.105 | 0.25  | 0.802 |
| Cancer code, self-reported: sarcoma/fibrosarcoma                                                      | -0.36 | 0.361 | -0.24 | 0.308 | -0.25 | 0.803 |
| Underlying (primary) cause of death: ICD10: G20 Parkinson's disease                                   | -0.60 | 0.635 | -0.26 | 0.649 | -0.25 | 0.803 |
| Diagnoses - main ICD10: L98 Other disorders of skin and subcutaneous tissue, not elsewhere classified | -0.11 | 0.545 | -0.06 | 0.522 | -0.25 | 0.804 |
| Underlying (primary) cause of death: ICD10: C16.0 Cardia                                              | 0.06  | 0.800 | 0.13  | 0.261 | -0.25 | 0.805 |

|                                                                              |       |       |       |          |       |       |
|------------------------------------------------------------------------------|-------|-------|-------|----------|-------|-------|
| Diagnoses - main ICD10: J36 Peritonsillar abscess                            | -0.75 | 0.631 | -0.34 | 0.572    | -0.24 | 0.806 |
| Non-cancer illness code, self-reported: vaginal prolapse/uterine prolapse    | -0.05 | 0.746 | -0.01 | 0.944    | -0.24 | 0.808 |
| Leg pain on walking : effect of standing still                               | -0.19 | 0.474 | -0.12 | 0.440    | -0.24 | 0.810 |
| Treatment/medication code: hydroxocobalamin                                  | 0.17  | 0.603 | 0.08  | 0.592    | 0.24  | 0.810 |
| Pain type(s) experienced in last month: Headache                             | 0.11  | 0.107 | 0.09  | 0.016    | 0.24  | 0.810 |
| Smoking status: Current                                                      | 0.03  | 0.686 | 0.05  | 0.287    | -0.24 | 0.811 |
| Diagnoses - main ICD10: I12 Hypertensive renal disease                       | 0.01  | 0.980 | 0.08  | 0.536    | -0.24 | 0.811 |
| Underlying (primary) cause of death: ICD10: C45.0 Mesothelioma of pleura     | -0.21 | 0.447 | -0.13 | 0.391    | -0.24 | 0.811 |
| Non-cancer illness code, self-reported: headaches (not migraine)             | 0.11  | 0.713 | 0.03  | 0.825    | 0.24  | 0.812 |
| Diagnoses - main ICD10: R42 Dizziness and giddiness                          | 0.45  | 0.216 | 0.35  | 0.093    | 0.24  | 0.812 |
| Medication for pain relief, constipation, heartburn: Paracetamol             | 0.14  | 0.050 | 0.16  | 7.60E-06 | -0.24 | 0.812 |
| Why reduced smoking: Health precaution                                       | -0.08 | 0.726 | -0.15 | 0.217    | 0.24  | 0.813 |
| Diagnoses - main ICD10: C69 Malignant neoplasm of eye and adnexa             | 0.18  | 0.604 | 0.28  | 0.233    | -0.24 | 0.813 |
| Impedance of leg (left)                                                      | -0.05 | 0.308 | -0.06 | 0.070    | 0.24  | 0.813 |
| Why stopped smoking: None of the above                                       | 0.03  | 0.809 | 0.06  | 0.301    | -0.24 | 0.814 |
| Loud music exposure frequency                                                | 0.10  | 0.424 | 0.13  | 0.018    | -0.23 | 0.814 |
| Non-cancer illness code, self-reported: sleep apnoea                         | 0.23  | 0.263 | 0.28  | 0.013    | -0.23 | 0.815 |
| Diagnoses - main ICD10: G93 Other disorders of brain                         | 0.06  | 0.937 | 0.31  | 0.697    | -0.23 | 0.816 |
| Treatment/medication code: clonazepam                                        | -0.12 | 0.838 | 0.03  | 0.910    | -0.23 | 0.816 |
| Treatment/medication code: co-enzyme q10/ubiquinone/bio-quinone/coenzyme q10 | -0.05 | 0.937 | -0.28 | 0.687    | 0.23  | 0.816 |
| Diagnoses - main ICD10: L91 Hypertrophic disorders of skin                   | 0.01  | 0.972 | 0.10  | 0.564    | -0.23 | 0.816 |
| Current employment status: Looking after home and/or family                  | 0.07  | 0.665 | 0.03  | 0.697    | 0.23  | 0.817 |
| Treatment/medication code: aqueous cream bp                                  | -0.02 | 0.936 | -0.09 | 0.537    | 0.23  | 0.819 |
| Treatment/medication code: nitromin 400micrograms cfc-free spray             | 0.10  | 0.784 | 0.20  | 0.405    | -0.23 | 0.820 |
| Time spent using computer                                                    | 0.02  | 0.796 | 0.00  | 0.972    | 0.23  | 0.820 |
| Weight change compared with 1 year ago                                       | 0.14  | 0.273 | 0.17  | 0.005    | -0.23 | 0.820 |
| Non-cancer illness code, self-reported: cardiomyopathy                       | 0.27  | 0.380 | 0.19  | 0.183    | 0.23  | 0.821 |
| Diagnoses - main ICD10: Z51 Other medical care                               | -0.01 | 0.978 | 0.06  | 0.664    | -0.22 | 0.822 |
| Non-cancer illness code, self-reported: meniere's disease                    | 0.19  | 0.447 | 0.25  | 0.115    | -0.22 | 0.823 |
| Treatment/medication code: macrogol ointment                                 | 0.15  | 0.741 | 0.28  | 0.397    | -0.22 | 0.824 |

|                                                                                     |       |       |       |       |       |       |
|-------------------------------------------------------------------------------------|-------|-------|-------|-------|-------|-------|
| Treatment/medication code: metronidazole                                            | 0.16  | 0.734 | 0.31  | 0.503 | -0.22 | 0.824 |
| Non-cancer illness code, self-reported: bursitis                                    | -0.26 | 0.632 | -0.09 | 0.871 | -0.22 | 0.825 |
| Diagnoses - main ICD10: M45 Ankylosing spondylitis                                  | 0.05  | 0.844 | -0.02 | 0.920 | 0.22  | 0.826 |
| Underlying (primary) cause of death: ICD10: I50.9 Heart failure, unspecified        | 0.37  | 0.640 | 0.17  | 0.667 | 0.22  | 0.826 |
| Treatment/medication code: digoxin                                                  | 0.12  | 0.586 | 0.07  | 0.539 | 0.22  | 0.826 |
| Treatment/medication code: brinzolamide                                             | -0.18 | 0.676 | -0.08 | 0.643 | -0.22 | 0.827 |
| Diagnoses - main ICD10: S20 Superficial injury of thorax                            | 0.15  | 0.588 | 0.22  | 0.150 | -0.22 | 0.828 |
| Treatment/medication code: detrusitol 1mg tablet                                    | 0.10  | 0.692 | 0.04  | 0.762 | 0.22  | 0.828 |
| Treatment/medication code: metformin                                                | 0.11  | 0.195 | 0.13  | 0.005 | -0.22 | 0.829 |
| Diagnoses - main ICD10: R86 Abnormal findings in specimens from male genital organs | 0.48  | 0.769 | 0.12  | 0.787 | 0.21  | 0.831 |
| Wears glasses or contact lenses                                                     | 0.04  | 0.725 | 0.01  | 0.783 | 0.21  | 0.831 |
| Diagnoses - main ICD10: N75 Diseases of Bartholin's gland                           | -0.08 | 0.721 | -0.13 | 0.274 | 0.21  | 0.831 |
| Non-cancer illness code, self-reported: peripheral vascular disease                 | -0.04 | 0.826 | 0.00  | 0.977 | -0.21 | 0.833 |
| Doctor diagnosed hayfever or allergic rhinitis                                      | -0.01 | 0.881 | 0.01  | 0.870 | -0.21 | 0.834 |
| Illnesses of siblings: Chronic bronchitis/emphysema                                 | 0.19  | 0.229 | 0.23  | 0.009 | -0.21 | 0.834 |
| Heel bone mineral density (BMD) T-score, automated (right)                          | 0.00  | 0.991 | -0.02 | 0.739 | 0.21  | 0.834 |
| Happiness                                                                           | 0.10  | 0.259 | 0.08  | 0.068 | 0.21  | 0.834 |
| Underlying (primary) cause of death: ICD10: C53.9 Cervix uteri, unspecified         | -0.55 | 0.880 | 0.27  | 0.852 | -0.21 | 0.835 |
| Treatment/medication code: nurofen 200mg tablet                                     | 0.22  | 0.824 | 0.00  | 0.997 | 0.21  | 0.835 |
| Diagnoses - main ICD10: N86 Erosion and ectropion of cervix uteri                   | 0.05  | 0.823 | 0.00  | 0.987 | 0.21  | 0.835 |
| Average monthly red wine intake                                                     | -0.06 | 0.744 | -0.02 | 0.834 | -0.21 | 0.835 |
| Cancer code, self-reported: small intestine/small bowel cancer                      | 0.10  | 0.838 | -0.01 | 0.959 | 0.20  | 0.838 |
| Treatment/medication code: pioglitazone                                             | 0.21  | 0.254 | 0.17  | 0.052 | 0.20  | 0.838 |
| Non-cancer illness code, self-reported: renal failure not requiring dialysis        | 0.78  | 0.759 | 0.25  | 0.749 | 0.20  | 0.840 |
| Tinnitus: Yes, now some of the time                                                 | 0.06  | 0.785 | 0.11  | 0.299 | -0.20 | 0.841 |
| Diagnoses - main ICD10: N18 Chronic renal failure                                   | 0.23  | 0.835 | 0.90  | 0.776 | -0.20 | 0.841 |
| Non-cancer illness code, self-reported: bronchitis                                  | 0.05  | 0.902 | 0.13  | 0.460 | -0.20 | 0.843 |
| Diagnoses - main ICD10: R51 Headache                                                | 0.01  | 0.982 | 0.06  | 0.674 | -0.20 | 0.843 |
| Treatment/medication code: progynova 1mg tablet                                     | -0.20 | 0.412 | -0.14 | 0.269 | -0.20 | 0.843 |

|                                                                                                    |       |       |       |          |       |       |
|----------------------------------------------------------------------------------------------------|-------|-------|-------|----------|-------|-------|
| Diagnoses - main ICD10: R47 Speech disturbances, not elsewhere classified                          | -0.19 | 0.661 | -0.31 | 0.408    | 0.20  | 0.844 |
| Fractured bone site(s): Wrist                                                                      | 0.11  | 0.441 | 0.15  | 0.071    | -0.20 | 0.844 |
| Diagnoses - main ICD10: J03 Acute tonsillitis                                                      | 0.02  | 0.925 | -0.03 | 0.816    | 0.20  | 0.845 |
| Treatment/medication code: coversyl plus 4mg/1.25mg tablet                                         | -0.12 | 0.724 | -0.05 | 0.791    | -0.19 | 0.847 |
| Diagnoses - main ICD10: K61 Abscess of anal and rectal regions                                     | 0.25  | 0.417 | 0.19  | 0.207    | 0.19  | 0.847 |
| Treatment/medication code: eprosartan                                                              | -0.20 | 0.729 | -0.08 | 0.766    | -0.19 | 0.848 |
| Vascular/heart problems diagnosed by doctor: High blood pressure                                   | 0.10  | 0.090 | 0.09  | 0.031    | 0.19  | 0.848 |
| Treatment/medication code: viazem xl 120mg m/r capsule                                             | 0.01  | 0.961 | -0.04 | 0.722    | 0.19  | 0.849 |
| Diagnoses - main ICD10: K63 Other diseases of intestine                                            | -0.03 | 0.910 | 0.03  | 0.849    | -0.19 | 0.851 |
| Diagnoses - main ICD10: C44 Other malignant neoplasms of skin                                      | -0.21 | 0.096 | -0.24 | 2.00E-04 | 0.19  | 0.851 |
| Diagnoses - main ICD10: S66 Injury of muscle and tendon at wrist and hand level                    | 0.12  | 0.590 | 0.07  | 0.514    | 0.19  | 0.851 |
| Pain type(s) experienced in last month: None of the above                                          | -0.13 | 0.024 | -0.14 | 5.19E-06 | 0.19  | 0.851 |
| Treatment/medication code: hydroxocobalamin product                                                | 0.05  | 0.850 | 0.00  | 0.972    | 0.19  | 0.852 |
| Diagnoses - main ICD10: K52 Other non-infective gastro-enteritis and colitis                       | 0.24  | 0.162 | 0.20  | 0.024    | 0.19  | 0.853 |
| Diagnoses - main ICD10: K01 Embedded and impacted teeth                                            | 0.10  | 0.708 | 0.04  | 0.782    | 0.19  | 0.853 |
| Treatment/medication code: anadin tablet                                                           | 0.03  | 0.925 | -0.03 | 0.831    | 0.19  | 0.853 |
| Diagnoses - main ICD10: I48 Atrial fibrillation and flutter                                        | 0.01  | 0.899 | 0.04  | 0.479    | -0.19 | 0.853 |
| Diagnoses - main ICD10: K91 Postprocedural disorders of digestive system, not elsewhere classified | -0.07 | 0.720 | -0.03 | 0.736    | -0.18 | 0.855 |
| Treatment/medication code: zolmitriptan                                                            | -0.09 | 0.731 | -0.04 | 0.787    | -0.18 | 0.856 |
| Diagnoses - main ICD10: H60 Otitis externa                                                         | 0.19  | 0.600 | 0.27  | 0.227    | -0.18 | 0.856 |
| Treatment/medication code: aspirin                                                                 | 0.15  | 0.131 | 0.17  | 0.005    | -0.18 | 0.856 |
| Ever had hysterectomy (womb removed)                                                               | -0.11 | 0.399 | -0.09 | 0.275    | -0.18 | 0.858 |
| Non-cancer illness code, self-reported: raynaud's phenomenon/disease                               | -0.10 | 0.680 | -0.05 | 0.716    | -0.17 | 0.861 |
| Treatment/medication code: ramipril                                                                | 0.13  | 0.250 | 0.11  | 0.103    | 0.17  | 0.862 |
| Non-cancer illness code, self-reported: peripheral nerve disorder                                  | -0.07 | 0.846 | -0.15 | 0.452    | 0.17  | 0.863 |
| Which eye(s) affected by astigmatism: Left eye                                                     | -0.59 | 0.493 | -0.41 | 0.463    | -0.17 | 0.863 |
| Diagnoses - main ICD10: C19 Malignant neoplasm of rectosigmoid junction                            | 0.04  | 0.953 | -0.11 | 0.849    | 0.17  | 0.863 |
| Diagnoses - main ICD10: D12 Benign neoplasm of colon, rectum, anus and anal canal                  | 0.01  | 0.956 | 0.03  | 0.633    | -0.17 | 0.864 |
| Pack years of smoking PREVIEW ONLY                                                                 | 0.10  | 0.187 | 0.08  | 0.047    | 0.17  | 0.864 |

|                                                                             |       |       |       |       |       |       |
|-----------------------------------------------------------------------------|-------|-------|-------|-------|-------|-------|
| Diagnoses - main ICD10: H11 Other disorders of conjunctiva                  | -0.13 | 0.638 | -0.19 | 0.216 | 0.17  | 0.865 |
| Diagnoses - main ICD10: R55 Syncope and collapse                            | -0.03 | 0.868 | 0.00  | 0.966 | -0.17 | 0.867 |
| Treatment/medication code: nicorandil                                       | 0.22  | 0.289 | 0.18  | 0.096 | 0.17  | 0.867 |
| Non-cancer illness code, self-reported: joint disorder                      | 0.12  | 0.595 | 0.08  | 0.480 | 0.17  | 0.867 |
| Illnesses of siblings: Breast cancer                                        | -0.08 | 0.711 | -0.12 | 0.248 | 0.17  | 0.867 |
| Treatment/medication code: klioavance 1mg/0.5mg tablet                      | -0.40 | 0.898 | 0.14  | 0.872 | -0.17 | 0.868 |
| Diagnoses - main ICD10: R53 Malaise and fatigue                             | 0.10  | 0.736 | 0.05  | 0.705 | 0.17  | 0.868 |
| Diagnoses - main ICD10: K25 Gastric ulcer                                   | 0.33  | 0.701 | 0.56  | 0.606 | -0.17 | 0.868 |
| Treatment/medication code: pantoprazole                                     | 0.02  | 0.937 | 0.05  | 0.591 | -0.17 | 0.868 |
| Cancer code, self-reported: chronic lymphocytic                             | 0.01  | 0.970 | -0.04 | 0.795 | 0.17  | 0.869 |
| Non-cancer illness code, self-reported: bone disorder                       | 0.15  | 0.647 | 0.21  | 0.214 | -0.17 | 0.869 |
| Systolic blood pressure, automated reading                                  | -0.01 | 0.915 | 0.01  | 0.894 | -0.16 | 0.870 |
| Treatment/medication code: voltarol emulgel                                 | 0.05  | 0.946 | 0.25  | 0.786 | -0.16 | 0.870 |
| Treatment/medication code: ibuprofen                                        | 0.09  | 0.413 | 0.07  | 0.232 | 0.16  | 0.870 |
| Non-cancer illness code, self-reported: obsessive compulsive disorder (ocd) | 0.06  | 0.889 | 0.13  | 0.536 | -0.16 | 0.871 |
| Smoked cigarette or pipe within last hour                                   | -0.28 | 0.789 | -0.10 | 0.818 | -0.16 | 0.872 |
| Treatment/medication code: esomeprazole                                     | -0.05 | 0.861 | -0.09 | 0.454 | 0.16  | 0.872 |
| Treatment/medication code: iodine 200mg tablet                              | 0.18  | 0.522 | 0.13  | 0.389 | 0.16  | 0.872 |
| Treatment/medication code: chlorpheniramine                                 | -0.03 | 0.966 | 0.49  | 0.877 | -0.16 | 0.873 |
| Treatment/medication code: aciclovir                                        | -0.41 | 0.588 | -0.59 | 0.480 | 0.16  | 0.873 |
| Diagnoses - main ICD10: G57 Mononeuropathies of lower limb                  | 0.08  | 0.907 | 0.35  | 0.821 | -0.16 | 0.874 |
| Treatment/medication code: fucibet cream                                    | -0.05 | 0.878 | -0.11 | 0.569 | 0.16  | 0.874 |
| Treatment/medication code: rhumalgan 25mg e/c tablet                        | -0.34 | 0.497 | -0.25 | 0.425 | -0.16 | 0.875 |
| Father still alive                                                          | -0.02 | 0.887 | -0.05 | 0.552 | 0.16  | 0.875 |
| Treatment/medication code: verapamil                                        | 0.05  | 0.863 | 0.00  | 0.997 | 0.16  | 0.875 |
| Treatment/medication code: calcium salts                                    | -0.06 | 0.848 | -0.11 | 0.479 | 0.16  | 0.875 |
| Treatment/medication code: anusol cream                                     | 0.17  | 0.483 | 0.13  | 0.288 | 0.16  | 0.876 |
| Diagnoses - main ICD10: I95 Hypotension                                     | 0.45  | 0.722 | 0.22  | 0.747 | 0.16  | 0.876 |
| Eye problems/disorders: Macular degeneration                                | -0.05 | 0.881 | 0.01  | 0.963 | -0.16 | 0.876 |
| Non-cancer illness code, self-reported: diabetic eye disease                | 0.50  | 0.288 | 0.60  | 0.129 | -0.15 | 0.877 |



|                                                                                               |       |       |       |       |       |       |
|-----------------------------------------------------------------------------------------------|-------|-------|-------|-------|-------|-------|
| Treatment/medication code: garlic product                                                     | 0.05  | 0.816 | 0.09  | 0.400 | -0.15 | 0.877 |
| Diagnoses - main ICD10: C18 Malignant neoplasm of colon                                       | -0.09 | 0.632 | -0.05 | 0.539 | -0.15 | 0.878 |
| Underlying (primary) cause of death: ICD10: I42.0 Dilated cardiomyopathy                      | 0.00  | 0.999 | 0.06  | 0.713 | -0.15 | 0.878 |
| Transport type for commuting to job workplace: Walk                                           | -0.10 | 0.426 | -0.08 | 0.190 | -0.15 | 0.879 |
| Cancer code, self-reported: lung cancer                                                       | 0.45  | 0.732 | 0.23  | 0.751 | 0.15  | 0.879 |
| Treatment/medication code: calcium+vitamin d 500units tablet                                  | -0.54 | 0.664 | -0.32 | 0.688 | -0.15 | 0.880 |
| Treatment/medication code: losartan potassium+hydrochlorothiazide 50mg/12.5mg tablet          | -0.18 | 0.587 | -0.12 | 0.509 | -0.15 | 0.880 |
| Treatment/medication code: kalms tablet                                                       | 0.14  | 0.581 | 0.10  | 0.437 | 0.15  | 0.880 |
| Ever had stillbirth, spontaneous miscarriage or termination                                   | 0.03  | 0.819 | 0.01  | 0.940 | 0.15  | 0.882 |
| Pain type(s) experienced in last month: Pain all over the body                                | 0.20  | 0.121 | 0.18  | 0.004 | 0.15  | 0.883 |
| Non-cancer illness code, self-reported: rheumatoid arthritis                                  | 0.24  | 0.147 | 0.27  | 0.009 | -0.15 | 0.884 |
| Non-cancer illness code, self-reported: uterine fibroids                                      | 0.17  | 0.248 | 0.15  | 0.046 | 0.15  | 0.884 |
| Treatment/medication code: sulphasalazine                                                     | -0.17 | 0.745 | -0.26 | 0.444 | 0.15  | 0.884 |
| Non-cancer illness code, self-reported: dry eyes                                              | 0.36  | 0.419 | 0.28  | 0.202 | 0.14  | 0.885 |
| Treatment/medication code: femoston 1/10 tablet                                               | 0.03  | 0.936 | -0.03 | 0.863 | 0.14  | 0.885 |
| Years since last cervical smear test                                                          | -0.03 | 0.872 | 0.00  | 0.998 | -0.14 | 0.886 |
| No-wear time bias adjusted acceleration standard deviation                                    | -0.12 | 0.212 | -0.10 | 0.019 | -0.14 | 0.888 |
| Underlying (primary) cause of death: ICD10: C80.9 Malignant neoplasm, unspecified             | 0.06  | 0.873 | 0.00  | 0.996 | 0.14  | 0.888 |
| Diagnoses - main ICD10: Q38 Other congenital malformations of tongue, mouth and pharynx       | 0.14  | 0.628 | 0.10  | 0.520 | 0.14  | 0.889 |
| Average monthly fortified wine intake                                                         | 0.01  | 0.976 | -0.04 | 0.802 | 0.14  | 0.889 |
| Diagnoses - main ICD10: O42 Premature rupture of membranes                                    | 0.04  | 0.917 | -0.02 | 0.919 | 0.14  | 0.890 |
| Treatment/medication code: cod liver oil capsule                                              | -0.06 | 0.740 | -0.03 | 0.717 | -0.14 | 0.892 |
| Cancer code, self-reported: rodent ulcer                                                      | -0.05 | 0.825 | -0.09 | 0.564 | 0.13  | 0.893 |
| Diagnoses - main ICD10: J34 Other disorders of nose and nasal sinuses                         | 0.06  | 0.790 | 0.09  | 0.443 | -0.13 | 0.893 |
| Treatment/medication code: simvador 10mg tablet                                               | 0.34  | 0.431 | 0.41  | 0.164 | -0.13 | 0.893 |
| Transport type for commuting to job workplace: Cycle                                          | -0.09 | 0.395 | -0.07 | 0.094 | -0.13 | 0.894 |
| Treatment/medication code: tildiem 60mg m/r tablet                                            | -0.05 | 0.815 | -0.02 | 0.899 | -0.13 | 0.895 |
| Underlying (primary) cause of death: ICD10: K55.9 Vascular disorder of intestine, unspecified | 0.01  | 0.971 | -0.04 | 0.806 | 0.13  | 0.895 |

|                                                                                         |       |       |       |       |       |       |
|-----------------------------------------------------------------------------------------|-------|-------|-------|-------|-------|-------|
| Treatment/medication code: becotide 50 inhaler                                          | 0.01  | 0.971 | -0.02 | 0.833 | 0.13  | 0.896 |
| Hand grip strength (right)                                                              | -0.01 | 0.843 | 0.00  | 0.894 | -0.13 | 0.896 |
| Treatment/medication code: colestyramine                                                | 0.43  | 0.574 | 0.56  | 0.438 | -0.13 | 0.897 |
| Treatment/medication code: oestrogen product                                            | -0.17 | 0.711 | -0.10 | 0.678 | -0.13 | 0.897 |
| Hair/balding pattern: Pattern 3                                                         | -0.01 | 0.941 | 0.01  | 0.892 | -0.13 | 0.898 |
| Diagnoses - main ICD10: E87 Other disorders of fluid, electrolyte and acid-base balance | 0.10  | 0.813 | 0.16  | 0.514 | -0.13 | 0.898 |
| Number of live births                                                                   | 0.08  | 0.296 | 0.07  | 0.043 | 0.13  | 0.899 |
| Non-cancer illness code, self-reported: umbilical hernia                                | 0.17  | 0.468 | 0.14  | 0.256 | 0.13  | 0.899 |
| Non-cancer illness code, self-reported: muscle/soft tissue problem                      | 0.12  | 0.603 | 0.15  | 0.234 | -0.13 | 0.900 |
| Number of pregnancy terminations                                                        | -0.05 | 0.701 | -0.03 | 0.658 | -0.12 | 0.902 |
| Treatment/medication code: selenium product                                             | -0.05 | 0.856 | -0.01 | 0.926 | -0.12 | 0.903 |
| Fracture resulting from simple fall                                                     | 0.01  | 0.940 | -0.01 | 0.905 | 0.12  | 0.906 |
| Treatment/medication code: sotalol                                                      | -0.04 | 0.886 | 0.00  | 0.982 | -0.12 | 0.907 |
| Treatment/medication code: loratadine                                                   | 0.32  | 0.137 | 0.29  | 0.013 | 0.12  | 0.908 |
| Treatment/medication code: singulair 10mg tablet                                        | 0.15  | 0.762 | 0.08  | 0.717 | 0.12  | 0.908 |
| Why reduced smoking: Financial reasons                                                  | 0.25  | 0.630 | 0.18  | 0.468 | 0.12  | 0.908 |
| Treatment/medication code: polyvinyl alcohol 1% eye drops                               | -0.10 | 0.774 | -0.14 | 0.406 | 0.11  | 0.909 |
| Diagnoses - main ICD10: I83 Varicose veins of lower extremities                         | -0.07 | 0.485 | -0.05 | 0.357 | -0.11 | 0.909 |
| Illnesses of siblings: None of the above (group 2)                                      | -0.02 | 0.861 | -0.04 | 0.582 | 0.11  | 0.910 |
| Treatment/medication code: propranolol                                                  | 0.09  | 0.606 | 0.11  | 0.223 | -0.11 | 0.910 |
| Current employment status: Full or part-time student                                    | 0.21  | 0.367 | 0.18  | 0.281 | 0.11  | 0.911 |
| Non-cancer illness code, self-reported: crohns disease                                  | -0.01 | 0.952 | 0.01  | 0.905 | -0.11 | 0.911 |
| Diagnoses - main ICD10: N80 Endometriosis                                               | -0.02 | 0.913 | -0.04 | 0.622 | 0.11  | 0.911 |
| Treatment/medication code: senna                                                        | 0.20  | 0.466 | 0.24  | 0.099 | -0.11 | 0.912 |
| Family relationship satisfaction                                                        | 0.09  | 0.325 | 0.08  | 0.074 | 0.11  | 0.914 |
| Cancer code, self-reported: kidney/renal cell cancer                                    | 0.24  | 0.404 | 0.28  | 0.124 | -0.11 | 0.914 |
| Frequency of heavy DIY in last 4 weeks                                                  | 0.05  | 0.692 | 0.06  | 0.368 | -0.11 | 0.915 |
| Diagnoses - main ICD10: L40 Psoriasis                                                   | 0.03  | 0.909 | 0.00  | 1.000 | 0.11  | 0.916 |
| Treatment/medication code: cosopt 2%/0.5% eye drops                                     | -0.03 | 0.878 | -0.01 | 0.948 | -0.11 | 0.916 |

|                                                                                                     |       |       |       |       |       |       |
|-----------------------------------------------------------------------------------------------------|-------|-------|-------|-------|-------|-------|
| Diagnoses - main ICD10: L57 Skin changes due to chronic exposure to nonionising radiation           | -0.22 | 0.524 | -0.18 | 0.319 | -0.10 | 0.917 |
| Diagnoses - main ICD10: R12 Heartburn                                                               | 0.26  | 0.707 | 0.36  | 0.605 | -0.10 | 0.917 |
| Diagnoses - main ICD10: G61 Inflammatory polyneuropathy                                             | 0.10  | 0.694 | 0.07  | 0.635 | 0.10  | 0.918 |
| Diagnoses - main ICD10: K65 Peritonitis                                                             | -0.52 | 0.852 | -0.22 | 0.843 | -0.10 | 0.919 |
| Non-cancer illness code, self-reported: duodenal ulcer                                              | 0.67  | 0.828 | 0.32  | 0.847 | 0.10  | 0.920 |
| Mineral and other dietary supplements: Glucosamine                                                  | -0.05 | 0.502 | -0.06 | 0.130 | 0.10  | 0.921 |
| Non-cancer illness code, self-reported: scarlet fever / scarlatina                                  | -0.20 | 0.627 | -0.15 | 0.452 | -0.10 | 0.921 |
| Treatment/medication code: uniphyllin continus 200mg m/r tablet                                     | 0.59  | 0.710 | 0.41  | 0.678 | 0.10  | 0.922 |
| Treatment/medication code: mirtazapine                                                              | -0.04 | 0.940 | 0.03  | 0.950 | -0.10 | 0.922 |
| Number of days/week of moderate physical activity 10+ minutes                                       | -0.03 | 0.712 | -0.02 | 0.624 | -0.10 | 0.923 |
| Duration of strenuous sports                                                                        | -0.07 | 0.750 | -0.04 | 0.691 | -0.10 | 0.924 |
| Used an inhaler for chest within last hour                                                          | 0.12  | 0.570 | 0.15  | 0.141 | -0.10 | 0.924 |
| Treatment/medication code: fludrocortisone                                                          | 0.19  | 0.531 | 0.22  | 0.222 | -0.10 | 0.924 |
| Diagnoses - main ICD10: I86 Varicose veins of other sites                                           | 0.16  | 0.556 | 0.13  | 0.320 | 0.09  | 0.924 |
| Diagnoses - main ICD10: D28 Benign neoplasm of other and unspecified female genital organs          | -0.16 | 0.513 | -0.14 | 0.335 | -0.09 | 0.925 |
| Medication for cholesterol, blood pressure, diabetes, or take exogenous hormones: None of the above | -0.14 | 0.080 | -0.15 | 0.006 | 0.09  | 0.925 |
| Diagnoses - main ICD10: E16 Other disorders of pancreatic internal secretion                        | 0.20  | 0.366 | 0.18  | 0.130 | 0.09  | 0.926 |
| Treatment/medication code: fosinopril                                                               | 0.15  | 0.571 | 0.18  | 0.216 | -0.09 | 0.926 |
| Underlying (primary) cause of death: ICD10: C16.9 Stomach, unspecified                              | 0.05  | 0.865 | 0.02  | 0.888 | 0.09  | 0.927 |
| Medication for pain relief, constipation, heartburn: Ranitidine (e.g. Zantac)                       | 0.20  | 0.222 | 0.22  | 0.019 | -0.09 | 0.927 |
| Treatment/medication code: nitrolingual 400micrograms spray                                         | 0.08  | 0.744 | 0.05  | 0.727 | 0.09  | 0.927 |
| Non-cancer illness code, self-reported: benign neuroma                                              | 0.18  | 0.472 | 0.16  | 0.217 | 0.09  | 0.928 |
| Diagnoses - main ICD10: K50 Crohn's disease [regional enteritis]                                    | 0.11  | 0.487 | 0.10  | 0.340 | 0.09  | 0.929 |
| Diagnoses - main ICD10: Z45 Adjustment and management of implanted device                           | 0.07  | 0.849 | 0.11  | 0.518 | -0.09 | 0.929 |
| Diagnoses - main ICD10: D21 Other benign neoplasms of connective and other soft tissue              | -0.19 | 0.485 | -0.17 | 0.202 | -0.09 | 0.931 |
| Treatment/medication code: sandrena 0.5mg gel                                                       | -0.10 | 0.698 | -0.13 | 0.345 | 0.09  | 0.931 |
| Diagnoses - main ICD10: T81 Complications of procedures, not elsewhere classified                   | 0.33  | 0.108 | 0.35  | 0.003 | -0.09 | 0.931 |

|                                                                                                               |       |       |       |       |       |       |
|---------------------------------------------------------------------------------------------------------------|-------|-------|-------|-------|-------|-------|
| Tinnitus: Yes, now a lot of the time                                                                          | 0.09  | 0.662 | 0.11  | 0.391 | -0.08 | 0.932 |
| Most recent bowel cancer screening                                                                            | 0.02  | 0.916 | 0.04  | 0.684 | -0.08 | 0.933 |
| Diagnoses - main ICD10: R33 Retention of urine                                                                | 0.65  | 0.721 | 0.47  | 0.722 | 0.08  | 0.933 |
| Illnesses of siblings: Stroke                                                                                 | -0.01 | 0.974 | 0.01  | 0.910 | -0.08 | 0.933 |
| Treatment/medication code: orlistat                                                                           | 0.37  | 0.628 | 0.46  | 0.502 | -0.08 | 0.934 |
| Diagnoses - main ICD10: S12 Fracture of neck                                                                  | -0.03 | 0.931 | -0.07 | 0.742 | 0.08  | 0.935 |
| Length of menstrual cycle                                                                                     | 0.04  | 0.749 | 0.03  | 0.601 | 0.08  | 0.935 |
| Diagnoses - main ICD10: M67 Other disorders of synovium and tendon                                            | 0.23  | 0.389 | 0.21  | 0.168 | 0.08  | 0.935 |
| Non-cancer illness code, self-reported: fracture shoulder / scapula                                           | -0.07 | 0.878 | -0.03 | 0.901 | -0.08 | 0.936 |
| Non-cancer illness code, self-reported: hiv/aids                                                              | -0.35 | 0.349 | -0.32 | 0.220 | -0.08 | 0.937 |
| Treatment/medication code: rino clenil 50micrograms nasal spray                                               | 0.17  | 0.463 | 0.15  | 0.178 | 0.08  | 0.937 |
| Non-cancer illness code, self-reported: hypertension                                                          | 0.10  | 0.107 | 0.09  | 0.026 | 0.08  | 0.937 |
| Treatment/medication code: moxonidine                                                                         | 0.26  | 0.640 | 0.31  | 0.462 | -0.08 | 0.937 |
| Diagnoses - main ICD10: I84 Haemorrhoids                                                                      | 0.11  | 0.380 | 0.10  | 0.100 | 0.08  | 0.938 |
| Diagnoses - main ICD10: D64 Other anaemias                                                                    | 0.31  | 0.918 | 1.10  | 0.910 | -0.08 | 0.938 |
| Cancer code, self-reported: colon cancer/sigmoid cancer                                                       | 0.06  | 0.865 | 0.03  | 0.886 | 0.08  | 0.940 |
| Hair/balding pattern: Pattern 2                                                                               | -0.06 | 0.435 | -0.07 | 0.093 | 0.07  | 0.941 |
| Reason for reducing amount of alcohol drunk: Health precaution                                                | -0.04 | 0.627 | -0.04 | 0.481 | -0.07 | 0.942 |
| Diagnoses - main ICD10: I30 Acute pericarditis                                                                | -0.07 | 0.792 | -0.05 | 0.723 | -0.07 | 0.944 |
| Duration of fitness test                                                                                      | -0.05 | 0.816 | -0.03 | 0.769 | -0.07 | 0.944 |
| Treatment/medication code: flax oil tablet                                                                    | 0.13  | 0.431 | 0.14  | 0.087 | -0.07 | 0.945 |
| Handedness (chirality/laterality): Use both right and left hands equally                                      | 0.17  | 0.330 | 0.15  | 0.096 | 0.07  | 0.946 |
| Non-cancer illness code, self-reported: infectious mononucleosis / glandular fever / epstein barr virus (ebv) | 0.00  | 0.994 | 0.02  | 0.886 | -0.07 | 0.946 |
| Non-cancer illness code, self-reported: unclassifiable                                                        | 0.08  | 0.739 | 0.06  | 0.635 | 0.07  | 0.946 |
| Treatment/medication code: lipantil micro 67mg capsule                                                        | -0.22 | 0.752 | -0.17 | 0.648 | -0.07 | 0.947 |
| Treatment/medication code: antihistamine 60mg tablet                                                          | 0.19  | 0.638 | 0.16  | 0.427 | 0.06  | 0.948 |
| Treatment/medication code: cerazette 75micrograms tablet                                                      | 0.15  | 0.613 | 0.13  | 0.413 | 0.06  | 0.949 |
| Treatment/medication code: piriton 4mg tablet                                                                 | 0.14  | 0.648 | 0.11  | 0.519 | 0.06  | 0.949 |
| Diagnoses - main ICD10: E23 Hypofunction and other disorders of pituitary gland                               | -0.02 | 0.961 | 0.01  | 0.965 | -0.06 | 0.949 |

|                                                                                                        |       |       |       |          |       |       |
|--------------------------------------------------------------------------------------------------------|-------|-------|-------|----------|-------|-------|
| Diagnoses - main ICD10: S82 Fracture of lower leg, including ankle                                     | 0.37  | 0.779 | 0.50  | 0.747    | -0.06 | 0.949 |
| Number of full sisters                                                                                 | 0.09  | 0.402 | 0.10  | 0.122    | -0.06 | 0.951 |
| Treatment/medication code: gabapentin                                                                  | 0.02  | 0.917 | 0.01  | 0.928    | 0.06  | 0.951 |
| Birth weight                                                                                           | -0.08 | 0.264 | -0.08 | 0.034    | 0.06  | 0.952 |
| Illnesses of mother: Bowel cancer                                                                      | -0.14 | 0.389 | -0.15 | 0.098    | 0.06  | 0.952 |
| Diagnoses - main ICD10: F30 Manic episode                                                              | 0.01  | 0.988 | 0.04  | 0.890    | -0.06 | 0.954 |
| Types of transport used (excluding work): Walk                                                         | -0.03 | 0.725 | -0.02 | 0.650    | -0.06 | 0.955 |
| Underlying (primary) cause of death: ICD10: G35 Multiple sclerosis                                     | 0.12  | 0.908 | 0.05  | 0.923    | 0.06  | 0.955 |
| Treatment/medication code: seretide 50 evohaler                                                        | 0.10  | 0.411 | 0.09  | 0.109    | 0.06  | 0.955 |
| Cancer code, self-reported: cin/pre-cancer cells cervix                                                | 0.02  | 0.925 | 0.04  | 0.776    | -0.06 | 0.956 |
| Treatment/medication code: peptac liquid                                                               | 0.01  | 0.990 | -0.03 | 0.944    | 0.05  | 0.956 |
| Diagnoses - main ICD10: B34 Viral infection of unspecified site                                        | 0.21  | 0.755 | 0.25  | 0.572    | -0.05 | 0.957 |
| Vascular/heart problems diagnosed by doctor: None of the above                                         | -0.10 | 0.121 | -0.10 | 0.014    | 0.05  | 0.959 |
| Diagnoses - main ICD10: J43 Emphysema                                                                  | 0.01  | 0.965 | 0.03  | 0.801    | -0.05 | 0.959 |
| Time employed in main current job                                                                      | -0.09 | 0.511 | -0.08 | 0.425    | -0.05 | 0.959 |
| Diagnoses - main ICD10: D25 Leiomyoma of uterus                                                        | 0.10  | 0.508 | 0.10  | 0.166    | -0.05 | 0.960 |
| Non-cancer illness code, self-reported: oesophagitis/barretts oesophagus                               | -0.19 | 0.524 | -0.17 | 0.319    | -0.05 | 0.961 |
| Number of cigarettes currently smoked daily (current cigarette smokers)                                | 0.06  | 0.649 | 0.06  | 0.436    | 0.05  | 0.963 |
| Underlying (primary) cause of death: ICD10: K70.4 Alcoholic hepatic failure                            | 0.13  | 0.695 | 0.11  | 0.519    | 0.05  | 0.963 |
| Treatment/medication code: b12 - cyanocobalamin prep                                                   | 0.00  | 0.993 | 0.03  | 0.928    | -0.05 | 0.964 |
| Treatment/medication code: tolterodine l-tartrate                                                      | 0.25  | 0.388 | 0.27  | 0.085    | -0.05 | 0.964 |
| Diagnoses - main ICD10: N63 Unspecified lump in breast                                                 | -0.10 | 0.732 | -0.11 | 0.473    | 0.04  | 0.965 |
| Treatment/medication code: lacidipine                                                                  | -0.12 | 0.770 | -0.14 | 0.501    | 0.04  | 0.965 |
| Diagnoses - main ICD10: M95 Other acquired deformities of musculoskeletal system and connective tissue | -0.01 | 0.975 | -0.02 | 0.867    | 0.04  | 0.965 |
| Daytime dozing / sleeping (narcolepsy)                                                                 | 0.10  | 0.097 | 0.10  | 7.00E-04 | -0.04 | 0.966 |
| Diagnoses - main ICD10: S13 Dislocation, sprain and strain of joints and ligaments at neck level       | 0.20  | 0.578 | 0.18  | 0.283    | 0.04  | 0.967 |
| Diagnoses - main ICD10: S09 Other and unspecified injuries of head                                     | 0.14  | 0.368 | 0.14  | 0.194    | 0.04  | 0.968 |
| Non-cancer illness code, self-reported: peripheral nerve injury                                        | -0.20 | 0.580 | -0.22 | 0.300    | 0.04  | 0.968 |
| Underlying (primary) cause of death: ICD10: C83.3 Large cell (diffuse)                                 | -0.53 | 0.502 | -0.49 | 0.503    | -0.04 | 0.968 |

|                                                                                                                           |       |       |       |       |       |       |
|---------------------------------------------------------------------------------------------------------------------------|-------|-------|-------|-------|-------|-------|
| Cancer code, self-reported: squamous cell carcinoma                                                                       | -0.13 | 0.637 | -0.12 | 0.392 | -0.04 | 0.970 |
| Treatment/medication code: salmeterol                                                                                     | 0.12  | 0.571 | 0.12  | 0.294 | -0.04 | 0.970 |
| Non-cancer illness code, self-reported: rosacea                                                                           | 0.21  | 0.563 | 0.19  | 0.373 | 0.04  | 0.971 |
| Diagnoses - main ICD10: N13 Obstructive and reflux uropathy                                                               | 0.11  | 0.693 | 0.10  | 0.532 | 0.04  | 0.971 |
| Diastolic blood pressure, automated reading                                                                               | 0.03  | 0.579 | 0.04  | 0.391 | -0.04 | 0.971 |
| Treatment/medication code: almotriptan                                                                                    | -0.05 | 0.812 | -0.05 | 0.699 | -0.03 | 0.972 |
| Pack years adult smoking as proportion of life span exposed to smoking PREVIEW ONLY                                       | 0.08  | 0.240 | 0.08  | 0.063 | 0.03  | 0.973 |
| Illnesses of mother: Parkinson's disease                                                                                  | -0.30 | 0.553 | -0.33 | 0.427 | 0.03  | 0.974 |
| Diagnoses - main ICD10: H02 Other disorders of eyelid                                                                     | 0.40  | 0.585 | 0.43  | 0.499 | -0.03 | 0.974 |
| Treatment/medication code: glucophage 500mg tablet                                                                        | 0.05  | 0.903 | 0.06  | 0.754 | -0.03 | 0.974 |
| Diagnoses - main ICD10: N43 Hydrocele and spermatocele                                                                    | 0.00  | 0.994 | 0.00  | 0.955 | -0.03 | 0.974 |
| Non-cancer illness code, self-reported: systemic lupus erythematosus/sle                                                  | 0.45  | 0.426 | 0.43  | 0.261 | 0.03  | 0.975 |
| Diagnoses - main ICD10: I62 Other nontraumatic intracranial haemorrhage                                                   | 0.21  | 0.582 | 0.20  | 0.375 | 0.03  | 0.975 |
| Relative age of first facial hair                                                                                         | -0.04 | 0.493 | -0.05 | 0.189 | 0.03  | 0.975 |
| Treatment/medication code: lipitor 10mg tablet                                                                            | 0.27  | 0.437 | 0.25  | 0.278 | 0.03  | 0.975 |
| Diagnoses - main ICD10: K92 Other diseases of digestive system                                                            | 0.16  | 0.510 | 0.15  | 0.215 | 0.03  | 0.978 |
| Non-cancer illness code, self-reported: pleurisy                                                                          | 0.25  | 0.410 | 0.24  | 0.102 | 0.03  | 0.978 |
| Treatment/medication code: co-proxamol                                                                                    | 0.03  | 0.914 | 0.02  | 0.895 | 0.03  | 0.979 |
| Chest pain due to walking ceases when standing still                                                                      | 0.12  | 0.754 | 0.13  | 0.466 | -0.03 | 0.979 |
| Diagnoses - main ICD10: T50 Poisoning by diuretics and other and unspecified drugs, medicaments and biological substances | 0.04  | 0.863 | 0.04  | 0.700 | -0.03 | 0.979 |
| Illnesses of father: Bowel cancer                                                                                         | -0.08 | 0.763 | -0.07 | 0.618 | -0.03 | 0.979 |
| Diagnoses - main ICD10: K62 Other diseases of anus and rectum                                                             | 0.20  | 0.179 | 0.21  | 0.013 | -0.03 | 0.980 |
| Non-cancer illness code, self-reported: malabsorption/coeliac disease                                                     | 0.23  | 0.165 | 0.22  | 0.033 | 0.03  | 0.980 |
| Treatment/medication code: cinnarizine                                                                                    | 0.15  | 0.553 | 0.15  | 0.245 | 0.02  | 0.980 |
| Underlying (primary) cause of death: ICD10: K76.0 Fatty (change of) liver, not elsewhere classified                       | -0.19 | 0.550 | -0.20 | 0.278 | 0.02  | 0.980 |
| Home area population density - urban or rural: Scotland - Accessible Rural                                                | -0.16 | 0.688 | -0.17 | 0.479 | 0.02  | 0.981 |
| Doctor diagnosed idiopathic pulmonary fibrosis                                                                            | 0.50  | 0.467 | 0.48  | 0.387 | 0.02  | 0.981 |
| Non-cancer illness code, self-reported: rheumatic fever                                                                   | 0.11  | 0.761 | 0.10  | 0.586 | 0.02  | 0.982 |

|                                                                                                               |       |       |       |          |       |       |
|---------------------------------------------------------------------------------------------------------------|-------|-------|-------|----------|-------|-------|
| Treatment/medication code: candesartan cilexetil                                                              | 0.15  | 0.290 | 0.16  | 0.021    | -0.02 | 0.983 |
| Underlying (primary) cause of death: ICD10: I61.9 Intracerebral haemorrhage, unspecified                      | -0.50 | 0.908 | -0.39 | 0.903    | -0.02 | 0.983 |
| Treatment/medication code: solpadol caplet                                                                    | -0.19 | 0.674 | -0.18 | 0.520    | -0.02 | 0.984 |
| Non-cancer illness code, self-reported: inflammatory bowel disease                                            | 0.14  | 0.696 | 0.14  | 0.470    | -0.02 | 0.984 |
| Years since last breast cancer screening / mammogram                                                          | -0.10 | 0.655 | -0.11 | 0.408    | 0.02  | 0.984 |
| Non-cancer illness code, self-reported: sarcoidosis                                                           | 0.19  | 0.263 | 0.19  | 0.050    | 0.02  | 0.985 |
| Diagnoses - main ICD10: N21 Calculus of lower urinary tract                                                   | -0.16 | 0.800 | -0.17 | 0.727    | 0.02  | 0.987 |
| Underlying (primary) cause of death: ICD10: C71.0 Cerebrum, except lobes and ventricles                       | 0.19  | 0.656 | 0.20  | 0.479    | -0.01 | 0.989 |
| Diagnoses - main ICD10: R59 Enlarged lymph nodes                                                              | 0.01  | 0.985 | 0.01  | 0.938    | -0.01 | 0.991 |
| Diagnoses - main ICD10: F32 Depressive episode                                                                | 0.15  | 0.610 | 0.15  | 0.271    | -0.01 | 0.991 |
| Average monthly champagne plus white wine intake                                                              | 0.06  | 0.811 | 0.06  | 0.608    | 0.01  | 0.992 |
| Diagnoses - main ICD10: C09 Malignant neoplasm of tonsil                                                      | 0.31  | 0.849 | 0.33  | 0.805    | -0.01 | 0.993 |
| Mouth/teeth dental problems: Bleeding gums                                                                    | 0.07  | 0.443 | 0.07  | 0.243    | -0.01 | 0.993 |
| Tinnitus: Yes, now most or all of the time                                                                    | 0.22  | 0.090 | 0.22  | 9.00E-04 | -0.01 | 0.993 |
| Non-cancer illness code, self-reported: other abdominal problem                                               | 0.08  | 0.780 | 0.09  | 0.620    | -0.01 | 0.994 |
| Diagnoses - main ICD10: K44 Diaphragmatic hernia                                                              | 0.14  | 0.399 | 0.14  | 0.130    | -0.01 | 0.994 |
| Treatment/medication code: tacrolimus                                                                         | 0.27  | 0.527 | 0.27  | 0.288    | -0.01 | 0.995 |
| Medication for cholesterol, blood pressure, diabetes, or take exogenous hormones: Hormone replacement therapy | -0.01 | 0.936 | -0.01 | 0.895    | -0.01 | 0.995 |
| Treatment/medication code: solpadeine capsule                                                                 | 0.37  | 0.963 | 0.31  | 0.961    | 0.01  | 0.995 |
| Treatment/medication code: kelp+garlic product                                                                | 0.21  | 0.399 | 0.21  | 0.145    | 0.00  | 0.996 |
| Diagnoses - main ICD10: O64 Obstructed labour due to malposition and malpresentation of foetus                | 0.08  | 0.788 | 0.08  | 0.566    | 0.00  | 0.996 |
| Non-cancer illness code, self-reported: otosclerosis                                                          | 0.44  | 0.855 | 0.45  | 0.552    | 0.00  | 0.997 |
| Pain type(s) experienced in last month: Back pain                                                             | 0.13  | 0.062 | 0.13  | 8.00E-04 | 0.00  | 0.998 |
| Diagnoses - main ICD10: D69 Purpura and other haemorrhagic conditions                                         | 0.40  | 0.458 | 0.40  | 0.210    | 0.00  | 0.999 |
| Type of tobacco currently smoked: Hand-rolled cigarettes                                                      | -0.06 | 0.827 | -0.06 | 0.596    | 0.00  | 0.999 |
| Diagnoses - main ICD10: C21 Malignant neoplasm of anus and anal canal                                         | -0.04 | 0.959 | -0.04 | 0.928    | 0.00  | 0.999 |

**Table S9:** Results from enrichment analysis conducted with respect to hyperthyroidism and hypothyroidism.

| Enrichment                                        | Genes, N | Hyperthyroidism |                 | Hypothyroidism |                 | Difference |          |
|---------------------------------------------------|----------|-----------------|-----------------|----------------|-----------------|------------|----------|
|                                                   |          | $\beta$         | $p$             | $\beta$        | $p$             | $z$        | $p$      |
| GO~mhc_class_ii_protein_complex                   | 14       | 3.33            | <b>4.58E-30</b> | 3.18           | <b>2.08E-18</b> | 0.320      | 7.49E-01 |
| KEGG~autoimmune_thyroid_disease                   | 49       | 1.5             | <b>4.41E-21</b> | 1.9            | <b>6.00E-22</b> | -1.567     | 1.17E-01 |
| GO~mhc_protein_complex                            | 24       | 1.66            | <b>3.42E-19</b> | 1.32           | <b>7.16E-09</b> | 1.138      | 2.55E-01 |
| GO~mhc_class_ii_receptor_activity                 | 10       | 2.34            | <b>3.60E-17</b> | 2.06           | <b>1.91E-09</b> | 0.626      | 5.31E-01 |
| KEGG~allograft_rejection                          | 34       | 1.36            | <b>9.42E-16</b> | 1.6            | <b>2.06E-14</b> | -0.883     | 3.77E-01 |
| KEGG~type_i_diabetes_mellitus                     | 41       | 1.09            | <b>2.29E-14</b> | 1.08           | <b>9.20E-10</b> | 0.044      | 9.65E-01 |
| KEGG~asthma                                       | 27       | 1.27            | <b>2.51E-14</b> | 1.32           | <b>1.32E-10</b> | -0.186     | 8.52E-01 |
| KEGG~graft_versus_host_disease                    | 37       | 1.03            | <b>8.75E-12</b> | 1.21           | <b>1.44E-10</b> | -0.734     | 4.63E-01 |
| KEGG~intestinal_immune_network_for_iga_production | 43       | 0.989           | <b>3.31E-11</b> | 1.16           | <b>3.34E-10</b> | -0.709     | 4.78E-01 |
| GO~mhc_class_ii_protein_complex_binding           | 16       | 1.39            | <b>8.41E-10</b> | 0.689          | 8.11E-03        | 1.906      | 5.67E-02 |
| KEGG~viral_myocarditis                            | 66       | 0.626           | <b>3.48E-08</b> | 0.558          | 5.60E-05        | 0.368      | 7.13E-01 |
| GO~regulation_of_immune_response                  | 780      | 0.171           | <b>7.93E-08</b> | 0.316          | <b>3.53E-15</b> | -2.789     | 5.29E-03 |
| GO~antigen_binding                                | 79       | 0.546           | <b>1.69E-07</b> | 0.434          | 5.59E-04        | 0.656      | 5.12E-01 |
| KEGG~systemic_lupus_erythematosus                 | 124      | 0.49            | <b>5.01E-07</b> | 0.488          | <b>4.58E-05</b> | 0.012      | 9.90E-01 |
| Gaurnier~psmd4_targets                            | 66       | 0.528           | <b>6.21E-07</b> | 0.553          | <b>2.27E-05</b> | -0.144     | 8.85E-01 |
| GO~mhc_protein_complex_binding                    | 19       | 0.978           | <b>6.62E-07</b> | 0.454          | 3.57E-02        | 1.622      | 1.05E-01 |
| GO~positive_regulation_of_cell_activation         | 275      | 0.262           | <b>8.44E-07</b> | 0.539          | <b>1.32E-15</b> | -3.169     | 1.53E-03 |
| KEGG~leishmania_infection                         | 66       | 0.559           | <b>9.05E-07</b> | 0.656          | <b>3.34E-06</b> | -0.518     | 6.04E-01 |
| GO~positive_regulation_of_immune_response         | 505      | 0.187           | <b>1.02E-06</b> | 0.342          | <b>1.44E-12</b> | -2.465     | 1.37E-02 |
| KEGG~antigen_processing_and_presentation          | 82       | 0.512           | <b>1.76E-06</b> | 0.675          | <b>4.44E-07</b> | -0.928     | 3.54E-01 |
| GO~interferon_gamma_mediated_signaling_pathway    | 66       | 0.53            | <b>1.96E-06</b> | 0.863          | <b>7.38E-10</b> | -1.815     | 6.96E-02 |
| GO~peptide_antigen_binding                        | 26       | 0.861           | <b>2.01E-06</b> | 1.16           | <b>2.89E-07</b> | -1.003     | 3.16E-01 |
| GO~positive_regulation_of_cell_cell_adhesion      | 229      | 0.283           | <b>2.02E-06</b> | 0.475          | <b>2.71E-10</b> | -1.956     | 5.05E-02 |
| GO~luminal_side_of_membrane                       | 28       | 0.8             | <b>4.23E-06</b> | 1.29           | <b>3.47E-09</b> | -1.710     | 8.73E-02 |
| GO~positive_regulation_of_cytokine_production     | 356      | 0.209           | <b>4.55E-06</b> | 0.228          | 5.08E-05        | -0.253     | 8.00E-01 |
| GO~positive_regulation_of_immune_system_process   | 797      | 0.141           | 4.76E-06        | 0.301          | <b>1.38E-14</b> | -3.150     | 1.63E-03 |



|                                                           |      |        |          |       |                 |        |          |
|-----------------------------------------------------------|------|--------|----------|-------|-----------------|--------|----------|
| GO~antigen_receptor_mediated_signaling_pathway            | 167  | 0.299  | 9.03E-06 | 0.547 | <b>1.40E-10</b> | -2.232 | 2.56E-02 |
| GO~immune_response                                        | 1003 | 0.127  | 1.36E-05 | 0.272 | <b>2.42E-13</b> | -3.007 | 2.64E-03 |
| GO~positive_regulation_of_t_cell_proliferation            | 90   | 0.391  | 3.18E-05 | 0.671 | <b>1.77E-08</b> | -1.791 | 7.33E-02 |
| GO~innate_immune_response                                 | 551  | 0.162  | 3.61E-05 | 0.29  | <b>5.46E-09</b> | -1.969 | 4.90E-02 |
| GO~regulation_of_cell_activation                          | 448  | 0.17   | 5.08E-05 | 0.405 | <b>4.27E-14</b> | -3.372 | 7.47E-04 |
| GO~regulation_of_b_cell_activation                        | 97   | 0.356  | 8.83E-05 | 0.656 | <b>1.34E-08</b> | -1.982 | 4.75E-02 |
| GO~cellular_response_to_cytokine_stimulus                 | 585  | 0.147  | 9.28E-05 | 0.243 | <b>3.45E-07</b> | -1.530 | 1.26E-01 |
| GO~activation_of_immune_response                          | 374  | 0.171  | 9.76E-05 | 0.359 | <b>1.83E-10</b> | -2.561 | 1.04E-02 |
| Reactome~phosphorylation_of_cd3_and_tcr_zeta_chains       | 15   | 0.951  | 9.80E-05 | 2.03  | <b>8.33E-11</b> | -2.652 | 8.00E-03 |
| GO~regulation_of_t_cell_proliferation                     | 139  | 0.29   | 1.36E-04 | 0.521 | <b>7.42E-08</b> | -1.818 | 6.90E-02 |
| GO~regulation_of_homotypic_cell_cell_adhesion             | 293  | 0.196  | 1.52E-04 | 0.425 | <b>1.54E-10</b> | -2.648 | 8.10E-03 |
| GO~positive_regulation_of_leukocyte_proliferation         | 131  | 0.287  | 1.55E-04 | 0.578 | <b>2.75E-09</b> | -2.289 | 2.21E-02 |
| GO~positive_regulation_of_b_cell_activation               | 64   | 0.396  | 1.62E-04 | 0.642 | <b>1.42E-06</b> | -1.400 | 1.61E-01 |
| GO~macrophage_activation_involved_in_immune_response      | 11   | 1.08   | 1.68E-04 | 1.98  | <b>7.02E-08</b> | -1.866 | 6.20E-02 |
| GO~regulation_of_immune_system_process                    | 1312 | 0.0913 | 1.88E-04 | 0.232 | <b>1.96E-13</b> | -3.435 | 5.93E-04 |
| GO~cellular_response_to_interferon_gamma                  | 117  | 0.309  | 2.47E-04 | 0.677 | <b>4.14E-10</b> | -2.605 | 9.18E-03 |
| GO~regulation_of_lymphocyte_differentiation               | 126  | 0.279  | 2.48E-04 | 0.5   | <b>2.63E-07</b> | -1.728 | 8.40E-02 |
| GO~t_cell_receptor_signaling_pathway                      | 139  | 0.264  | 2.74E-04 | 0.5   | <b>6.97E-08</b> | -1.938 | 5.26E-02 |
| GO~regulation_of_leukocyte_proliferation                  | 198  | 0.226  | 3.01E-04 | 0.537 | <b>2.83E-11</b> | -2.958 | 3.09E-03 |
| GO~regulation_of_cell_cell_adhesion                       | 366  | 0.165  | 3.61E-04 | 0.355 | <b>2.51E-09</b> | -2.442 | 1.46E-02 |
| GO~cytokine_mediated_signaling_pathway                    | 431  | 0.154  | 4.04E-04 | 0.299 | <b>8.05E-08</b> | -1.981 | 4.76E-02 |
| GO~positive_regulation_of_interferon_gamma_production     | 63   | 0.397  | 4.20E-04 | 0.721 | <b>5.60E-07</b> | -1.706 | 8.80E-02 |
| Biocarta~ctla4_pathway                                    | 19   | 0.782  | 5.34E-04 | 1.85  | <b>2.37E-10</b> | -2.802 | 5.09E-03 |
| GO~adaptive_immune_response                               | 239  | 0.198  | 5.40E-04 | 0.399 | <b>6.02E-08</b> | -2.081 | 3.74E-02 |
| GO~regulation_of_innate_immune_response                   | 337  | 0.162  | 5.53E-04 | 0.316 | <b>1.62E-07</b> | -1.945 | 5.17E-02 |
| Reactome~interferon_gamma_signaling                       | 58   | 0.413  | 6.04E-04 | 1.11  | <b>1.59E-12</b> | -3.438 | 5.85E-04 |
| Reactome~pd1_signaling                                    | 16   | 0.711  | 8.02E-04 | 2.03  | <b>2.02E-13</b> | -3.672 | 2.41E-04 |
| GO~response_to_cytokine                                   | 686  | 0.107  | 1.30E-03 | 0.226 | <b>1.72E-07</b> | -2.089 | 3.67E-02 |
| Reactome~translocation_of_zap_70_to_immunological_synapse | 13   | 0.795  | 1.35E-03 | 2.26  | <b>3.76E-12</b> | -3.468 | 5.25E-04 |
| GO~response_to_interferon_gamma                           | 138  | 0.237  | 1.58E-03 | 0.61  | <b>5.26E-10</b> | -2.910 | 3.61E-03 |

|                                                                       |      |        |          |       |                 |        |          |
|-----------------------------------------------------------------------|------|--------|----------|-------|-----------------|--------|----------|
| GO~immune_system_process                                              | 1854 | 0.0648 | 1.64E-03 | 0.211 | <b>7.32E-15</b> | -4.161 | 3.17E-05 |
| GO~lymphocyte_costimulation                                           | 67   | 0.338  | 1.70E-03 | 0.813 | <b>7.25E-09</b> | -2.588 | 9.64E-03 |
| GO~immune_response_regulating_cell_surface_receptor_signaling_pathway | 277  | 0.155  | 1.83E-03 | 0.394 | <b>1.26E-09</b> | -2.817 | 4.85E-03 |
| GO~regulation_of_leukocyte_differentiation                            | 223  | 0.172  | 2.66E-03 | 0.369 | <b>8.13E-07</b> | -1.998 | 4.57E-02 |
| GO~regulation_of_t_cell_differentiation                               | 104  | 0.243  | 3.03E-03 | 0.557 | <b>2.01E-07</b> | -2.225 | 2.61E-02 |
| Basso~cd40_signaling_up                                               | 99   | 0.237  | 3.46E-03 | 0.511 | <b>1.37E-06</b> | -1.959 | 5.01E-02 |
| Biocarta~th1th2_pathway                                               | 18   | 0.625  | 3.70E-03 | 1.4   | <b>7.77E-07</b> | -2.083 | 3.72E-02 |
| GO~t_cell_differentiation                                             | 117  | 0.219  | 3.79E-03 | 0.476 | <b>1.53E-06</b> | -1.965 | 4.95E-02 |
| GO~positive_regulation_of_response_to_stimulus                        | 1820 | 0.0577 | 4.59E-03 | 0.139 | <b>2.32E-07</b> | -2.299 | 2.15E-02 |
| GO~immune_effector_process                                            | 440  | 0.114  | 4.84E-03 | 0.257 | <b>1.54E-06</b> | -2.027 | 4.27E-02 |
| GO~positive_regulation_of_cell_adhesion                               | 357  | 0.121  | 6.17E-03 | 0.32  | <b>5.31E-08</b> | -2.581 | 9.85E-03 |
| GO~leukocyte_activation                                               | 395  | 0.111  | 7.19E-03 | 0.366 | <b>4.43E-11</b> | -3.522 | 4.28E-04 |
| Reactome~tcr_signaling                                                | 50   | 0.326  | 7.65E-03 | 0.856 | <b>1.58E-07</b> | -2.468 | 1.36E-02 |
| GO~defense_response                                                   | 1139 | 0.0667 | 9.30E-03 | 0.173 | <b>4.81E-07</b> | -2.354 | 1.86E-02 |
| Reactome~generation_of_second_messenger_molecules                     | 25   | 0.43   | 1.05E-02 | 1.24  | <b>3.81E-08</b> | -2.731 | 6.31E-03 |
| GO~immune_system_development                                          | 560  | 0.0854 | 1.16E-02 | 0.268 | <b>5.09E-09</b> | -3.042 | 2.35E-03 |
| Zheng~foxp3_targets_up                                                | 26   | 0.408  | 1.19E-02 | 1.03  | <b>2.36E-06</b> | -2.154 | 3.12E-02 |
| Reactome~immune_system                                                | 857  | 0.0679 | 1.50E-02 | 0.22  | <b>7.90E-09</b> | -3.046 | 2.32E-03 |
| Reactome~adaptive_immune_system                                       | 496  | 0.0853 | 1.54E-02 | 0.231 | <b>1.25E-06</b> | -2.312 | 2.08E-02 |
| Reactome~downstream_tcr_signaling                                     | 34   | 0.355  | 1.55E-02 | 1.08  | <b>7.17E-08</b> | -2.762 | 5.75E-03 |
| PID~nfat_tfpathway                                                    | 44   | 0.297  | 1.79E-02 | 1.15  | <b>3.45E-11</b> | -3.772 | 1.62E-04 |
| GO~positive_regulation_of_lymphocyte_differentiation                  | 75   | 0.218  | 1.81E-02 | 0.576 | <b>4.24E-06</b> | -2.161 | 3.07E-02 |
| GO~lymphocyte_activation                                              | 324  | 0.0963 | 2.59E-02 | 0.35  | <b>6.35E-09</b> | -3.210 | 1.33E-03 |
| Reactome~costimulation_by_the_cd28_family                             | 60   | 0.235  | 2.64E-02 | 0.921 | <b>5.42E-10</b> | -3.545 | 3.92E-04 |
| GO~regulation_of_cell_adhesion                                        | 604  | 0.0716 | 2.76E-02 | 0.247 | <b>5.39E-08</b> | -2.939 | 3.29E-03 |
| KEGG~t_cell_receptor_signaling_pathway                                | 104  | 0.155  | 4.51E-02 | 0.574 | <b>2.31E-07</b> | -2.865 | 4.17E-03 |
| PID~il12_2pathway                                                     | 62   | 0.192  | 4.71E-02 | 0.676 | <b>1.10E-06</b> | -2.638 | 8.35E-03 |
| GO~regulation_of_response_to_stress                                   | 1414 | 0.0405 | 4.82E-02 | 0.139 | <b>2.38E-06</b> | -2.532 | 1.13E-02 |
| GO~leukocyte_differentiation                                          | 279  | 0.0891 | 4.95E-02 | 0.393 | <b>2.43E-09</b> | -3.528 | 4.18E-04 |
| GO~lymphocyte_differentiation                                         | 200  | 0.104  | 5.00E-02 | 0.424 | <b>3.67E-08</b> | -3.164 | 1.56E-03 |

|                                                         |     |         |          |       |                 |        |                 |
|---------------------------------------------------------|-----|---------|----------|-------|-----------------|--------|-----------------|
| PID~il12_stat4_pathway                                  | 33  | 0.27    | 6.32E-02 | 1.15  | <b>9.37E-08</b> | -3.117 | 1.83E-03        |
| GO~cell_activation                                      | 542 | 0.0569  | 7.24E-02 | 0.28  | <b>4.05E-09</b> | -3.585 | 3.37E-04        |
| GO~regulation_of_b_cell_proliferation                   | 54  | 0.163   | 1.03E-01 | 0.744 | <b>1.73E-06</b> | -2.827 | 4.70E-03        |
| Reactome~interferon_alpha_beta_signaling                | 61  | 0.137   | 1.51E-01 | 0.766 | <b>1.82E-06</b> | -2.968 | 3.00E-03        |
| GO~positive_regulation_of_cytokine_biosynthetic_process | 57  | 0.0729  | 2.75E-01 | 0.789 | <b>1.06E-07</b> | -3.674 | 2.39E-04        |
| Zheng~bound_by_foxp3                                    | 475 | 0.0234  | 2.91E-01 | 0.277 | <b>8.29E-08</b> | -3.742 | 1.83E-04        |
| GO~regulation_of_cytokine_biosynthetic_process          | 91  | 0.0394  | 3.47E-01 | 0.628 | <b>2.32E-07</b> | -3.695 | 2.20E-04        |
| Osman~bladder_cancer_dn                                 | 361 | 0.0137  | 3.82E-01 | 0.266 | <b>1.29E-06</b> | -3.467 | 5.25E-04        |
| Lu~il4_signaling                                        | 92  | 0.0216  | 4.10E-01 | 0.639 | <b>2.94E-08</b> | -4.079 | 4.52E-05        |
| PID~il27_pathway                                        | 26  | 0.0235  | 4.51E-01 | 1.27  | <b>4.66E-08</b> | -4.095 | 4.22E-05        |
| Reactome~regulation_of_ifng_signaling                   | 12  | -0.03   | 5.45E-01 | 1.67  | <b>1.89E-07</b> | -4.030 | 5.58E-05        |
| KEGG~jak_stat_signaling_pathway                         | 147 | -0.0137 | 5.67E-01 | 0.582 | <b>4.41E-09</b> | -4.592 | <b>4.39E-06</b> |
| GO~rac_guanyl_nucleotide_exchange_factor_activity       | 13  | -0.36   | 9.00E-01 | 1.83  | <b>8.01E-08</b> | -4.888 | <b>1.02E-06</b> |
